# Supplementary material
Source: publisher figshare collection journal article supplement (https://gsajournals.figshare.com/ndownloader/files/20137718)
Supplement: Supplementary file 1 [file 20137718]

## Sheet: genesWg4
list of genes containing pG4 structures wihin their gene body and 1,000 bp upstream
Functional annotation data were retrieved from data (iwgsc_refseqv1.0_FunctionalAnnotation_v1__HCgenes_v1.0.TAB) avaliable through ehat-URGI database
Gene-ID	is_repr	AHRD-Quality-Code	Blast-Hit-Accession	Human-Readable-Description	Pfam-IDs-(Description)	Interpro-IDs-(Description)	GO-IDs-(Description)-via-Interpro	Gene-or-TE-TE?-U (via-function)	Pfam-IDs	Interpro-IDs	GO-IDs-via-Interpro
TraesCS1B02G365900.2	0	***	tr|G7J2P5|G7J2P5_MEDTR	Acyl-coenzyme A thioesterase-like protein	PF03061: Thioesterase superfamily	IPR006683: Thioesterase domain; IPR029069: HotDog domain		G	PF03061	IPR006683; IPR029069
TraesCS1B02G365900.1	1	***	tr|A0A0K9PWM4|A0A0K9PWM4_ZOSMR	Thioesterase family protein	PF03061: Thioesterase superfamily	IPR003736: Phenylacetic acid degradation-related domain; IPR006683: Thioesterase domain; IPR029069: HotDog domain		G	PF03061	IPR003736; IPR006683; IPR029069
TraesCS4B02G003200.1	1	***	tr|M7ZLW5|M7ZLW5_TRIUA	Poly(A) RNA polymerase GLD2-A				G
TraesCS5B02G099400.1	1	*-*	tr|A0A061EW44|A0A061EW44_THECC	Uveal autoantigen with coiled-coil domains and ankyrin repeats isoform 1				G
TraesCS1B02G316600.1	1	***	tr|B9RSW4|B9RSW4_RICCO	Prolyl 4-hydroxylase alpha subunit, putative	PF13640: 2OG-Fe(II) oxygenase superfamily; PF01549: ShK domain-like	IPR003582: ShKT domain; IPR005123: Oxoglutarate/iron-dependent dioxygenase; IPR006620: Prolyl 4-hydroxylase, alpha subunit	GO:0005506 MF: iron ion binding;GO:0016491 MF: oxidoreductase activity;GO:0016705 MF: oxidoreductase activity, acting on paired donors, with incorporation or reduction of molecular oxygen;GO:0031418 MF: L-ascorbic acid binding;GO:0055114 BP: oxidation-reduction process	G	PF13640; PF01549	IPR003582; IPR005123; IPR006620	GO:0005506; GO:0016491; GO:0016705; GO:0031418; GO:0055114
TraesCS3D02G205300.1	1	***	tr|M8AWI9|M8AWI9_AEGTA	Condensin complex subunit 2	PF05786: Condensin complex subunit 2	IPR022816: Condensin complex subunit 2/barren	GO:0000796 CC: condensin complex;GO:0007076 BP: mitotic chromosome condensation	G	PF05786	IPR022816	GO:0000796; GO:0007076
TraesCS3D02G519000.1	1	***	tr|A0A1E5WDN9|A0A1E5WDN9_9POAL	MACPF domain-containing protein	PF01823: MAC/Perforin domain	IPR020864: Membrane attack complex component/perforin (MACPF) domain		G	PF01823	IPR020864
TraesCS2D02G142800.1	1	***	tr|A0A0K9P2C5|A0A0K9P2C5_ZOSMR	Mitochondrial inner membrane translocase subunit Tim44	PF04280: Tim44-like domain	IPR007379: Tim44-like domain; IPR032710: NTF2-like domain		G	PF04280	IPR007379; IPR032710
TraesCS2D02G496000.1	1	***	tr|B6TNU9|B6TNU9_MAIZE	BSD domain containing protein	PF03909: BSD domain	IPR005607: BSD domain		G	PF03909	IPR005607
TraesCS5B02G234400.1	1	***	tr|Q67UZ0|Q67UZ0_ORYSJ	Aminotransferase	PF00155: Aminotransferase class I and II	IPR004839: Aminotransferase, class I/classII; IPR015421: Pyridoxal phosphate-dependent transferase, major region, subdomain 1; IPR015422: Pyridoxal phosphate-dependent transferase, subdomain 2; IPR015424: Pyridoxal phosphate-dependent transferase	GO:0003824 MF: catalytic activity;GO:0009058 BP: biosynthetic process;GO:0030170 MF: pyridoxal phosphate binding	G	PF00155	IPR004839; IPR015421; IPR015422; IPR015424	GO:0003824; GO:0009058; GO:0030170
TraesCS5B02G062200.1	1	***	tr|B6TRQ5|B6TRQ5_MAIZE	Tesmin/TSO1-like CXC domain containing protein	PF03638: Tesmin/TSO1-like CXC domain, cysteine-rich domain	IPR005172: CRC domain; IPR033467: Tesmin/TSO1-like CXC domain		G	PF03638	IPR005172; IPR033467
TraesCS3A02G341400.1	1	***	tr|Q5QMK5|Q5QMK5_ORYSJ	Auxin efflux carrier family protein-like	PF03547: Membrane transport protein	IPR004776: Membrane transport protein	GO:0016021 CC: integral component of membrane;GO:0055085 BP: transmembrane transport	G	PF03547	IPR004776	GO:0016021; GO:0055085
TraesCS1D02G084000.1	1	***	tr|A0A097PLV5|A0A097PLV5_SORBI	Bushy growth protein	PF04855: SNF5 / SMARCB1 / INI1	IPR006939: SNF5/SMARCB1/INI1	GO:0000228 CC: nuclear chromosome;GO:0006338 BP: chromatin remodeling	G	PF04855	IPR006939	GO:0000228; GO:0006338
TraesCS4A02G106600.1	1	***	tr|A0A1D5XYZ8|A0A1D5XYZ8_WHEAT	Arogenate dehydratase	PF00800: Prephenate dehydratase	IPR001086: Prephenate dehydratase; IPR018528: Prephenate dehydratase, conserved site	GO:0004664 MF: prephenate dehydratase activity;GO:0009094 BP: L-phenylalanine biosynthetic process	G	PF00800	IPR001086; IPR018528	GO:0004664; GO:0009094
TraesCS4A02G110900.1	1	***	tr|Q8S4W9|Q8S4W9_MAIZE	Pyruvate decarboxylase	PF02776: Thiamine pyrophosphate enzyme, N-terminal TPP binding domain; PF00205: Thiamine pyrophosphate enzyme, central domain; PF02775: Thiamine pyrophosphate enzyme, C-terminal TPP binding domain	IPR011766: Thiamine pyrophosphate enzyme, C-terminal TPP-binding; IPR012000: Thiamine pyrophosphate enzyme, central domain; IPR012001: Thiamine pyrophosphate enzyme, N-terminal TPP-binding domain; IPR012110: Thiamine pyrophosphate (TPP)-dependent enzyme; IPR029035: DHS-like NAD/FAD-binding domain; IPR029061: Thiamin diphosphate-binding fold	GO:0000287 MF: magnesium ion binding;GO:0003824 MF: catalytic activity;GO:0016831 MF: carboxy-lyase activity;GO:0030976 MF: thiamine pyrophosphate binding	G	PF02776; PF00205; PF02775	IPR011766; IPR012000; IPR012001; IPR012110; IPR029035; IPR029061	GO:0000287; GO:0003824; GO:0016831; GO:0030976
TraesCS4A02G110900.2	0	***	tr|Q8S4W9|Q8S4W9_MAIZE	Pyruvate decarboxylase	PF02776: Thiamine pyrophosphate enzyme, N-terminal TPP binding domain; PF00205: Thiamine pyrophosphate enzyme, central domain; PF02775: Thiamine pyrophosphate enzyme, C-terminal TPP binding domain	IPR011766: Thiamine pyrophosphate enzyme, C-terminal TPP-binding; IPR012000: Thiamine pyrophosphate enzyme, central domain; IPR012001: Thiamine pyrophosphate enzyme, N-terminal TPP-binding domain; IPR012110: Thiamine pyrophosphate (TPP)-dependent enzyme; IPR029035: DHS-like NAD/FAD-binding domain; IPR029061: Thiamin diphosphate-binding fold	GO:0000287 MF: magnesium ion binding;GO:0003824 MF: catalytic activity;GO:0016831 MF: carboxy-lyase activity;GO:0030976 MF: thiamine pyrophosphate binding	G	PF02776; PF00205; PF02775	IPR011766; IPR012000; IPR012001; IPR012110; IPR029035; IPR029061	GO:0000287; GO:0003824; GO:0016831; GO:0030976
TraesCS7D02G460200.3	0	***	tr|A0A1D6C937|A0A1D6C937_WHEAT	Protein DETOXIFICATION	PF01554: MatE	IPR002528: Multi antimicrobial extrusion protein	GO:0006855 BP: drug transmembrane transport;GO:0015238 MF: drug transmembrane transporter activity;GO:0015297 MF: antiporter activity;GO:0016020 CC: membrane;GO:0055085 BP: transmembrane transport	G	PF01554	IPR002528	GO:0006855; GO:0015238; GO:0015297; GO:0016020; GO:0055085
TraesCS2D02G232900.1	0	***	AT4G28370.4	RING/U-box superfamily protein	PF13639: Ring finger domain	IPR001841: Zinc finger, RING-type; IPR013083: Zinc finger, RING/FYVE/PHD-type	GO:0005515 MF: protein binding;GO:0008270 MF: zinc ion binding	G	PF13639	IPR001841; IPR013083	GO:0005515; GO:0008270
TraesCS2D02G232900.2	0	***	AT4G28370.4	RING/U-box superfamily protein	PF13639: Ring finger domain	IPR001841: Zinc finger, RING-type; IPR013083: Zinc finger, RING/FYVE/PHD-type	GO:0005515 MF: protein binding;GO:0008270 MF: zinc ion binding	G	PF13639	IPR001841; IPR013083	GO:0005515; GO:0008270
TraesCS2D02G232900.3	1	***	AT4G28370.4	RING/U-box superfamily protein	PF13639: Ring finger domain	IPR001841: Zinc finger, RING-type; IPR013083: Zinc finger, RING/FYVE/PHD-type	GO:0005515 MF: protein binding;GO:0008270 MF: zinc ion binding	G	PF13639	IPR001841; IPR013083	GO:0005515; GO:0008270
TraesCS2D02G232900.4	0	***	AT4G28370.4	RING/U-box superfamily protein	PF13639: Ring finger domain	IPR001841: Zinc finger, RING-type; IPR013083: Zinc finger, RING/FYVE/PHD-type	GO:0005515 MF: protein binding;GO:0008270 MF: zinc ion binding	G	PF13639	IPR001841; IPR013083	GO:0005515; GO:0008270
TraesCS2D02G232900.5	0	***	AT4G28370.4	RING/U-box superfamily protein	PF13639: Ring finger domain	IPR001841: Zinc finger, RING-type; IPR013083: Zinc finger, RING/FYVE/PHD-type	GO:0005515 MF: protein binding;GO:0008270 MF: zinc ion binding	G	PF13639	IPR001841; IPR013083	GO:0005515; GO:0008270
TraesCS3B02G425400.1	1	***	tr|A0A0K9NPZ5|A0A0K9NPZ5_ZOSMR	Mitochondrial intermediate peptidase	PF01432: Peptidase family M3	IPR001567: Peptidase M3A/M3B catalytic domain; IPR024080: Neurolysin/Thimet oligopeptidase, N-terminal	GO:0004222 MF: metalloendopeptidase activity;GO:0006508 BP: proteolysis	G	PF01432	IPR001567; IPR024080	GO:0004222; GO:0006508
TraesCS2A02G229400.2	0	***	tr|G7JMT3|G7JMT3_MEDTR	Calmodulin-binding transcription activator	PF12796: Ankyrin repeats (3 copies); PF00612: IQ calmodulin-binding motif	IPR000048: IQ motif, EF-hand binding site; IPR002110: Ankyrin repeat; IPR013783: Immunoglobulin-like fold; IPR014756: Immunoglobulin E-set; IPR020683: Ankyrin repeat-containing domain; IPR027417: P-loop containing nucleoside triphosphate hydrolase	GO:0005515 MF: protein binding	G	PF12796; PF00612	IPR000048; IPR002110; IPR013783; IPR014756; IPR020683; IPR027417	GO:0005515
TraesCS6D02G380900.1	1	*-*	tr|A0A1J3CSB5|A0A1J3CSB5_NOCCA	Glutathione S-transferase T3	PF14303: No apical meristem-associated C-terminal domain	IPR029466: No apical meristem-associated, C-terminal domain		G	PF14303	IPR029466
TraesCS4D02G065700.1	1	***	tr|A0A0K9P0N2|A0A0K9P0N2_ZOSMR	Methyltransferase	PF03602: Conserved hypothetical protein 95	IPR029063: S-adenosyl-L-methionine-dependent methyltransferase		G	PF03602	IPR029063
TraesCS3A02G340500.1	1	***	tr|A0A0K9NPK0|A0A0K9NPK0_ZOSMR	Cation/H(+) antiporter	PF00999: Sodium/hydrogen exchanger family	IPR006153: Cation/H+ exchanger	GO:0006812 BP: cation transport;GO:0015299 MF: solute:proton antiporter activity;GO:0016021 CC: integral component of membrane;GO:0055085 BP: transmembrane transport	G	PF00999	IPR006153	GO:0006812; GO:0015299; GO:0016021; GO:0055085
TraesCS2B02G111700.2	1	*-*	AT3G04220.1	Disease resistance protein (TIR-NBS-LRR class) family		IPR011991: Winged helix-turn-helix DNA-binding domain; IPR032675: Leucine-rich repeat domain, L domain-like		G		IPR011991; IPR032675
TraesCS2B02G111700.1	0	*-*	AT5G38350.1	Disease resistance protein (NBS-LRR class) family		IPR032675: Leucine-rich repeat domain, L domain-like		G		IPR032675
TraesCS5D02G238500.1	1	***	tr|Q10SN3|Q10SN3_ORYSJ	COP9 signalosome complex subunit 1, putative, expressed	PF10602: 26S proteasome subunit RPN7	IPR019585: 26S proteasome regulatory subunit Rpn7/COP9 signalosome complex subunit 1		G	PF10602	IPR019585
TraesCS2D02G060100.2	0	***	tr|A0A1D1XMC9|A0A1D1XMC9_9ARAE	Cleavage and polyadenylation specificity factor subunit 1	PF10433: Mono-functional DNA-alkylating methyl methanesulfonate N-term; PF03178: CPSF A subunit region	IPR004871: Cleavage/polyadenylation specificity factor, A subunit, C-terminal; IPR015943: WD40/YVTN repeat-like-containing domain	GO:0003676 MF: nucleic acid binding;GO:0005515 MF: protein binding;GO:0005634 CC: nucleus	G	PF10433; PF03178	IPR004871; IPR015943	GO:0003676; GO:0005515; GO:0005634
TraesCS7A02G186800.1	1	--*	AT1G76280.5	Tetratricopeptide repeat (TPR)-like superfamily protein				G
TraesCS3D02G208700.2	0	***	tr|Q2V9B5|Q2V9B5_SOLTU	3'-5' exonuclease domain-containing protein-like	PF01612: 3'-5' exonuclease	IPR002562: 3'-5' exonuclease domain; IPR012337: Ribonuclease H-like domain	GO:0003676 MF: nucleic acid binding;GO:0006139 BP: nucleobase-containing compound metabolic process;GO:0008408 MF: 3'-5' exonuclease activity	G	PF01612	IPR002562; IPR012337	GO:0003676; GO:0006139; GO:0008408
TraesCS3D02G208700.1	1	***	tr|M8D7W2|M8D7W2_AEGTA	Exonuclease 3'-5' domain-containing protein 1	PF01612: 3'-5' exonuclease; PF00013: KH domain	IPR002562: 3'-5' exonuclease domain; IPR004087: K Homology domain; IPR004088: K Homology domain, type 1; IPR012337: Ribonuclease H-like domain	GO:0003676 MF: nucleic acid binding;GO:0003723 MF: RNA binding;GO:0006139 BP: nucleobase-containing compound metabolic process;GO:0008408 MF: 3'-5' exonuclease activity	G	PF01612; PF00013	IPR002562; IPR004087; IPR004088; IPR012337	GO:0003676; GO:0003723; GO:0006139; GO:0008408
TraesCS5D02G153900.3	0	***	tr|B9S842|B9S842_RICCO	Dual specificity protein phosphatase, putative	PF00782: Dual specificity phosphatase, catalytic domain	IPR000340: Dual specificity phosphatase, catalytic domain; IPR000387: Tyrosine specific protein phosphatases domain; IPR016130: Protein-tyrosine phosphatase, active site; IPR020422: Dual specificity protein phosphatase domain; IPR029021: Protein-tyrosine phosphatase-like	GO:0004725 MF: protein tyrosine phosphatase activity;GO:0006470 BP: protein dephosphorylation;GO:0008138 MF: protein tyrosine/serine/threonine phosphatase activity;GO:0016311 BP: dephosphorylation;GO:0016791 MF: phosphatase activity	G	PF00782	IPR000340; IPR000387; IPR016130; IPR020422; IPR029021	GO:0004725; GO:0006470; GO:0008138; GO:0016311; GO:0016791
TraesCS5D02G153900.2	0	***	tr|A0A103Y6I4|A0A103Y6I4_CYNCS	Dual specificity phosphatase	PF00782: Dual specificity phosphatase, catalytic domain	IPR000340: Dual specificity phosphatase, catalytic domain; IPR000387: Tyrosine specific protein phosphatases domain; IPR016130: Protein-tyrosine phosphatase, active site; IPR016278: Dual specificity protein phosphatase 12; IPR020422: Dual specificity protein phosphatase domain; IPR029021: Protein-tyrosine phosphatase-like	GO:0004725 MF: protein tyrosine phosphatase activity;GO:0006470 BP: protein dephosphorylation;GO:0008138 MF: protein tyrosine/serine/threonine phosphatase activity;GO:0016311 BP: dephosphorylation;GO:0016791 MF: phosphatase activity	G	PF00782	IPR000340; IPR000387; IPR016130; IPR016278; IPR020422; IPR029021	GO:0004725; GO:0006470; GO:0008138; GO:0016311; GO:0016791
TraesCS5D02G153900.1	1	***	tr|B9S842|B9S842_RICCO	Dual specificity protein phosphatase, putative	PF00782: Dual specificity phosphatase, catalytic domain	IPR000340: Dual specificity phosphatase, catalytic domain; IPR000387: Tyrosine specific protein phosphatases domain; IPR016130: Protein-tyrosine phosphatase, active site; IPR020422: Dual specificity protein phosphatase domain; IPR029021: Protein-tyrosine phosphatase-like	GO:0004725 MF: protein tyrosine phosphatase activity;GO:0006470 BP: protein dephosphorylation;GO:0008138 MF: protein tyrosine/serine/threonine phosphatase activity;GO:0016311 BP: dephosphorylation;GO:0016791 MF: phosphatase activity	G	PF00782	IPR000340; IPR000387; IPR016130; IPR020422; IPR029021	GO:0004725; GO:0006470; GO:0008138; GO:0016311; GO:0016791
TraesCS5B02G297800.1	1	***	tr|A0A1D1Z4P4|A0A1D1Z4P4_9ARAE	Histidine protein methyltransferase 1		IPR029063: S-adenosyl-L-methionine-dependent methyltransferase		G		IPR029063
TraesCS5D02G323100.2	1	***	tr|B9SVE1|B9SVE1_RICCO	Homeobox protein, putative	PF00046: Homeobox domain; PF02183: Homeobox associated leucine zipper	IPR000047: Helix-turn-helix motif; IPR001356: Homeobox domain; IPR003106: Leucine zipper, homeobox-associated; IPR009057: Homeobox domain-like; IPR017970: Homeobox, conserved site	GO:0003677 MF: DNA binding;GO:0003700 MF: transcription factor activity, sequence-specific DNA binding;GO:0006355 BP: regulation of transcription, DNA-templated;GO:0043565 MF: sequence-specific DNA binding	G	PF00046; PF02183	IPR000047; IPR001356; IPR003106; IPR009057; IPR017970	GO:0003677; GO:0003700; GO:0006355; GO:0043565
TraesCS3D02G494100.1	1	***	tr|A0A103XC62|A0A103XC62_CYNCS	Arf GTPase activating protein	PF01412: Putative GTPase activating protein for Arf; PF00168: C2 domain	IPR000008: C2 domain; IPR001164: Arf GTPase activating protein	GO:0005096 MF: GTPase activator activity;GO:0005515 MF: protein binding	G	PF01412; PF00168	IPR000008; IPR001164	GO:0005096; GO:0005515
TraesCS2A02G464300.3	1	--*	AT2G43410.4	RNA binding protein	PF00076: RNA recognition motif. (a.k.a. RRM, RBD, or RNP domain)	IPR000504: RNA recognition motif domain	GO:0003676 MF: nucleic acid binding	G	PF00076	IPR000504	GO:0003676
TraesCS6B02G175100.2	1	***	tr|A3FBF6|A3FBF6_WHEAT	WRKY transcription factor	PF03106: WRKY DNA -binding domain	IPR003657: WRKY domain	GO:0003700 MF: transcription factor activity, sequence-specific DNA binding;GO:0006355 BP: regulation of transcription, DNA-templated;GO:0043565 MF: sequence-specific DNA binding	G	PF03106	IPR003657	GO:0003700; GO:0006355; GO:0043565
TraesCS1A02G161000.1	1	--*	AT5G53150.6	DnaJ heat shock amino-terminal domain protein				G
TraesCS6B02G175100.1	0	***	tr|A3FBF6|A3FBF6_WHEAT	WRKY transcription factor	PF03106: WRKY DNA -binding domain	IPR003657: WRKY domain	GO:0003700 MF: transcription factor activity, sequence-specific DNA binding;GO:0006355 BP: regulation of transcription, DNA-templated;GO:0043565 MF: sequence-specific DNA binding	G	PF03106	IPR003657	GO:0003700; GO:0006355; GO:0043565
TraesCS5D02G323100.1	0	***	tr|B9SVE1|B9SVE1_RICCO	Homeobox protein, putative	PF00046: Homeobox domain; PF02183: Homeobox associated leucine zipper	IPR000047: Helix-turn-helix motif; IPR001356: Homeobox domain; IPR003106: Leucine zipper, homeobox-associated; IPR009057: Homeobox domain-like; IPR017970: Homeobox, conserved site	GO:0003677 MF: DNA binding;GO:0003700 MF: transcription factor activity, sequence-specific DNA binding;GO:0006355 BP: regulation of transcription, DNA-templated;GO:0043565 MF: sequence-specific DNA binding	G	PF00046; PF02183	IPR000047; IPR001356; IPR003106; IPR009057; IPR017970	GO:0003677; GO:0003700; GO:0006355; GO:0043565
TraesCS1B02G240900.1	1	***	tr|B6TS29|B6TS29_MAIZE	CAAX prenyl protease 2	PF02517: CAAX protease self-immunity	IPR003675: CAAX amino terminal protease	GO:0016020 CC: membrane	G	PF02517	IPR003675	GO:0016020
TraesCS2B02G133200.1	1	***	tr|B9I7I6|B9I7I6_POPTR	Rubber elongation factor family protein	PF05755: Rubber elongation factor protein (REF)	IPR008802: Rubber elongation factor		G	PF05755	IPR008802
TraesCS5D02G131100.1	1	***	tr|B3H6G9|B3H6G9_ARATH	S-adenosyl-L-methionine-dependent methyltransferases superfamily protein	PF04072: Leucine carboxyl methyltransferase	IPR007213: Methyltransferase Ppm1/Ppm2/Tcmp; IPR029063: S-adenosyl-L-methionine-dependent methyltransferase	GO:0008168 MF: methyltransferase activity;GO:0032259 BP: methylation	G	PF04072	IPR007213; IPR029063	GO:0008168; GO:0032259
TraesCS5A02G426100.1	1	***	tr|Q0PGF2|Q0PGF2_RICCO	Chaperone protein dnaJ, putative	PF00226: DnaJ domain; PF01556: DnaJ C terminal domain; PF00684: DnaJ central domain	IPR001305: Heat shock protein DnaJ, cysteine-rich domain; IPR001623: DnaJ domain; IPR002939: Chaperone DnaJ, C-terminal; IPR008971: HSP40/DnaJ peptide-binding; IPR012724: Chaperone DnaJ; IPR018253: DnaJ domain, conserved site	GO:0005524 MF: ATP binding;GO:0006457 BP: protein folding;GO:0009408 BP: response to heat;GO:0031072 MF: heat shock protein binding;GO:0051082 MF: unfolded protein binding	G	PF00226; PF01556; PF00684	IPR001305; IPR001623; IPR002939; IPR008971; IPR012724; IPR018253	GO:0005524; GO:0006457; GO:0009408; GO:0031072; GO:0051082
TraesCS4A02G423200.1	1	***	tr|B6TK80|B6TK80_MAIZE	F-box domain containing protein				TE?
TraesCS2A02G554000.1	1	***	tr|B9HWK9|B9HWK9_POPTR	Aspartyl protease family protein	PF14543: Xylanase inhibitor N-terminal; PF14541: Xylanase inhibitor C-terminal	IPR021109: Aspartic peptidase domain; IPR032799: Xylanase inhibitor, C-terminal; IPR032861: Xylanase inhibitor, N-terminal; IPR033121: Peptidase family A1 domain		G	PF14543; PF14541	IPR021109; IPR032799; IPR032861; IPR033121
TraesCS2D02G355200.2	1	*-*	tr|A0A1D1YV29|A0A1D1YV29_9ARAE	Sister chromatid cohesion protein PDS5 B-B		IPR011989: Armadillo-like helical; IPR016024: Armadillo-type fold	GO:0005488 MF: binding	G		IPR011989; IPR016024	GO:0005488
TraesCS2D02G355200.1	0	*-*	tr|A0A1D1YV29|A0A1D1YV29_9ARAE	Sister chromatid cohesion protein PDS5 B-B		IPR011989: Armadillo-like helical; IPR016024: Armadillo-type fold	GO:0005488 MF: binding	G		IPR011989; IPR016024	GO:0005488
TraesCS5B02G403800.1	1	***	tr|R7W2A5|R7W2A5_AEGTA	GDSL esterase/lipase	PF00657: GDSL-like Lipase/Acylhydrolase	IPR001087: GDSL lipase/esterase	GO:0016788 MF: hydrolase activity, acting on ester bonds	G	PF00657	IPR001087	GO:0016788
TraesCS6B02G096200.1	1	***	tr|K3YY95|K3YY95_SETIT	Phospholipase D	PF00168: C2 domain; PF00614: Phospholipase D Active site motif; PF12357: Phospholipase D C terminal	IPR000008: C2 domain; IPR001736: Phospholipase D/Transphosphatidylase; IPR011402: Phospholipase D, plant; IPR024632: Phospholipase D, C-terminal	GO:0003824 MF: catalytic activity;GO:0004630 MF: phospholipase D activity;GO:0005509 MF: calcium ion binding;GO:0005515 MF: protein binding;GO:0016020 CC: membrane;GO:0046470 BP: phosphatidylcholine metabolic process	G	PF00168; PF00614; PF12357	IPR000008; IPR001736; IPR011402; IPR024632	GO:0003824; GO:0004630; GO:0005509; GO:0005515; GO:0016020; GO:0046470
TraesCS6A02G264400.1	0	***	tr|C4JA06|C4JA06_MAIZE	PLATZ transcription factor	PF04640: PLATZ transcription factor	IPR006734: Protein of unknown function DUF597		G	PF04640	IPR006734
TraesCS1D02G114600.1	1	***	tr|A8CF52|A8CF52_BRACM	Glycerophosphodiester phosphodiesterase	PF03009: Glycerophosphoryl diester phosphodiesterase family	IPR017946: PLC-like phosphodiesterase, TIM beta/alpha-barrel domain; IPR030395: Glycerophosphodiester phosphodiesterase domain	GO:0006629 BP: lipid metabolic process;GO:0008081 MF: phosphoric diester hydrolase activity	G	PF03009	IPR017946; IPR030395	GO:0006629; GO:0008081
TraesCS6B02G051600.1	1	--*	tr|A0A199VQD6|A0A199VQD6_ANACO	Ribosomal RNA small subunit methyltransferase G				G
TraesCS2D02G444700.1	0	***	tr|M7ZFK0|M7ZFK0_TRIUA	E3 ubiquitin-protein ligase RNF14	PF05773: RWD domain; PF01485: IBR domain, a half RING-finger domain	IPR001841: Zinc finger, RING-type; IPR002867: IBR domain; IPR006575: RWD domain; IPR013083: Zinc finger, RING/FYVE/PHD-type; IPR016135: Ubiquitin-conjugating enzyme/RWD-like; IPR017907: Zinc finger, RING-type, conserved site	GO:0005515 MF: protein binding;GO:0008270 MF: zinc ion binding	G	PF05773; PF01485	IPR001841; IPR002867; IPR006575; IPR013083; IPR016135; IPR017907	GO:0005515; GO:0008270
TraesCS7A02G082800.1	1	*-*	tr|A0A199VPY9|A0A199VPY9_ANACO	U4/U6 small nuclear ribonucleoprotein Prp3	PF08572: pre-mRNA processing factor 3 (PRP3); PF06544: Protein of unknown function (DUF1115)	IPR010541: Domain of unknown function DUF1115; IPR013881: Pre-mRNA-splicing factor 3		G	PF08572; PF06544	IPR010541; IPR013881
TraesCS2D02G444700.2	1	***	tr|M7ZFK0|M7ZFK0_TRIUA	E3 ubiquitin-protein ligase RNF14	PF05773: RWD domain; PF01485: IBR domain, a half RING-finger domain	IPR001841: Zinc finger, RING-type; IPR002867: IBR domain; IPR006575: RWD domain; IPR013083: Zinc finger, RING/FYVE/PHD-type; IPR016135: Ubiquitin-conjugating enzyme/RWD-like; IPR017907: Zinc finger, RING-type, conserved site	GO:0005515 MF: protein binding;GO:0008270 MF: zinc ion binding	G	PF05773; PF01485	IPR001841; IPR002867; IPR006575; IPR013083; IPR016135; IPR017907	GO:0005515; GO:0008270
TraesCS3B02G197800.1	1	***	tr|M8BWP7|M8BWP7_AEGTA	50S ribosomal protein L27	PF01016: Ribosomal L27 protein	IPR001684: Ribosomal protein L27; IPR018261: Ribosomal protein L27, conserved site	GO:0003735 MF: structural constituent of ribosome;GO:0005622 CC: intracellular;GO:0005840 CC: ribosome;GO:0006412 BP: translation	G	PF01016	IPR001684; IPR018261	GO:0003735; GO:0005622; GO:0005840; GO:0006412
TraesCS5B02G069200.4	0	*-*	tr|D7KE69|D7KE69_ARALL	Kinase family protein	PF00564: PB1 domain; PF07714: Protein tyrosine kinase	IPR000270: PB1 domain; IPR000719: Protein kinase domain; IPR001245: Serine-threonine/tyrosine-protein kinase, catalytic domain; IPR011009: Protein kinase-like domain; IPR017441: Protein kinase, ATP binding site	GO:0004672 MF: protein kinase activity;GO:0005515 MF: protein binding;GO:0005524 MF: ATP binding;GO:0006468 BP: protein phosphorylation	G	PF00564; PF07714	IPR000270; IPR000719; IPR001245; IPR011009; IPR017441	GO:0004672; GO:0005515; GO:0005524; GO:0006468
TraesCS5D02G244100.1	1	*-*	tr|A0A1E5WFY4|A0A1E5WFY4_9POAL	UPF0396 protein	PF06047: Ras-induced vulval development antagonist	IPR009269: NF-kappa-B-activating protein	GO:0003682 MF: chromatin binding;GO:0007219 BP: Notch signaling pathway;GO:0045892 BP: negative regulation of transcription, DNA-templated	G	PF06047	IPR009269	GO:0003682; GO:0007219; GO:0045892
TraesCS6B02G161800.2	0	***	tr|B9N0I2|B9N0I2_POPTR	ATP-dependent RNA helicase family protein	PF00270: DEAD/DEAH box helicase; PF00271: Helicase conserved C-terminal domain; PF13234: rRNA-processing arch domain; PF08148: DSHCT (NUC185) domain	IPR001650: Helicase, C-terminal; IPR011545: DEAD/DEAH box helicase domain; IPR012961: ATP-dependent RNA helicase Ski2, C-terminal; IPR014001: Helicase superfamily 1/2, ATP-binding domain; IPR025696: rRNA-processing arch domain; IPR027417: P-loop containing nucleoside triphosphate hydrolase	GO:0003676 MF: nucleic acid binding;GO:0005524 MF: ATP binding	TE?	PF00270; PF00271; PF13234; PF08148	IPR001650; IPR011545; IPR012961; IPR014001; IPR025696; IPR027417	GO:0003676; GO:0005524
TraesCS4B02G214200.1	1	***	tr|A0A1E5UQ43|A0A1E5UQ43_9POAL	BTB/POZ domain-containing protein		IPR011044: Quinoprotein amine dehydrogenase, beta chain-like; IPR011333: SKP1/BTB/POZ domain; IPR015943: WD40/YVTN repeat-like-containing domain	GO:0005515 MF: protein binding	G		IPR011044; IPR011333; IPR015943	GO:0005515
TraesCS4D02G215500.1	1	***	tr|Q10NP2|Q10NP2_ORYSJ	Calcium-binding EF hand family protein, putative, expressed	PF13432: Tetratricopeptide repeat; PF14559: Tetratricopeptide repeat	IPR002048: EF-hand domain; IPR011990: Tetratricopeptide-like helical domain; IPR011992: EF-hand domain pair; IPR013026: Tetratricopeptide repeat-containing domain; IPR019734: Tetratricopeptide repeat	GO:0005509 MF: calcium ion binding;GO:0005515 MF: protein binding	G	PF13432; PF14559	IPR002048; IPR011990; IPR011992; IPR013026; IPR019734	GO:0005509; GO:0005515
TraesCS2A02G514300.1	1	***	tr|A0A0K9PHY5|A0A0K9PHY5_ZOSMR	Ethylene-responsive transcription factor	PF00847: AP2 domain	IPR001471: AP2/ERF domain; IPR016177: DNA-binding domain	GO:0003677 MF: DNA binding;GO:0003700 MF: transcription factor activity, sequence-specific DNA binding;GO:0006355 BP: regulation of transcription, DNA-templated	G	PF00847	IPR001471; IPR016177	GO:0003677; GO:0003700; GO:0006355
TraesCS6A02G344700.1	1	*-*	tr|A0A059PRT6|A0A059PRT6_SALMI	MYB-related transcription factor	PF00249: Myb-like DNA-binding domain	IPR001005: SANT/Myb domain; IPR009057: Homeobox domain-like; IPR017930: Myb domain	GO:0003677 MF: DNA binding	G	PF00249	IPR001005; IPR009057; IPR017930	GO:0003677
TraesCS3A02G186200.1	1	***	tr|A0A0K9P241|A0A0K9P241_ZOSMR	Glutamate--tRNA ligase	PF00043: Glutathione S-transferase, C-terminal domain; PF00749: tRNA synthetases class I (E and Q), catalytic domain; PF03950: tRNA synthetases class I (E and Q), anti-codon binding domain	IPR000924: Glutamyl/glutaminyl-tRNA synthetase; IPR001412: Aminoacyl-tRNA synthetase, class I, conserved site; IPR004046: Glutathione S-transferase, C-terminal; IPR004526: Glutamyl-tRNA synthetase, archaeal/eukaryotic cytosolic; IPR010987: Glutathione S-transferase, C-terminal-like; IPR011035: Ribosomal protein L25/Gln-tRNA synthetase, anti-codon-binding domain; IPR014729: Rossmann-like alpha/bet…	GO:0000166 MF: nucleotide binding;GO:0004812 MF: aminoacyl-tRNA ligase activity;GO:0004818 MF: glutamate-tRNA ligase activity;GO:0005524 MF: ATP binding;GO:0005737 CC: cytoplasm;GO:0006412 BP: translation;GO:0006418 BP: tRNA aminoacylation for protein translation;GO:0006424 BP: glutamyl-tRNA aminoacylation;GO:0016876 MF: ligase activity, forming aminoacyl-tRNA and related compounds;GO:0043039 BP:…	G	PF00043; PF00749; PF03950	IPR000924; IPR001412; IPR004046; IPR004526; IPR010987; IPR011035; IPR014729; IPR020056; IPR020058; IPR020059; IPR020061	GO:0000166; GO:0004812; GO:0004818; GO:0005524; GO:0005737; GO:0006412; GO:0006418; GO:0006424; GO:0016876; GO:0043039
TraesCS2A02G092400.1	1	***	tr|M7ZUU8|M7ZUU8_TRIUA	D-alanine--D-alanine ligase	PF01820: D-ala D-ala ligase N-terminus; PF07478: D-ala D-ala ligase C-terminus	IPR000291: D-alanine--D-alanine ligase/VANA/B/C, conserved site; IPR011095: D-alanine--D-alanine ligase, C-terminal; IPR011127: D-alanine--D-alanine ligase, N-terminal domain; IPR011761: ATP-grasp fold; IPR013815: ATP-grasp fold, subdomain 1; IPR016185: Pre-ATP-grasp domain	GO:0003824 MF: catalytic activity;GO:0005524 MF: ATP binding;GO:0008716 MF: D-alanine-D-alanine ligase activity;GO:0046872 MF: metal ion binding	G	PF01820; PF07478	IPR000291; IPR011095; IPR011127; IPR011761; IPR013815; IPR016185	GO:0003824; GO:0005524; GO:0008716; GO:0046872
TraesCS5A02G451500.1	1	***	tr|M7Z5U1|M7Z5U1_TRIUA	BTB/POZ and MATH domain-containing protein 2	PF00651: BTB/POZ domain	IPR000210: BTB/POZ domain; IPR002083: MATH/TRAF domain; IPR008974: TRAF-like; IPR011333: SKP1/BTB/POZ domain	GO:0005515 MF: protein binding	G	PF00651	IPR000210; IPR002083; IPR008974; IPR011333	GO:0005515
TraesCS3D02G509700.1	1	*-*	AT4G39790.1	bZIP transcription factor, putative (DUF630 and DUF632)	PF04783: Protein of unknown function (DUF630); PF04782: Protein of unknown function (DUF632)	IPR006867: Domain of unknown function DUF632; IPR006868: Domain of unknown function DUF630		G	PF04783; PF04782	IPR006867; IPR006868
TraesCS3D02G317900.1	1	***	tr|B6U5R9|B6U5R9_MAIZE	C2H2 zinc finger protein		IPR013087: Zinc finger C2H2-type	GO:0003676 MF: nucleic acid binding	TE?		IPR013087	GO:0003676
TraesCS6B02G222600.3	0	--*	AT5G22220.3	E2F transcription factor 1				G
TraesCS5B02G348700.1	1	***	tr|A0A061DZG6|A0A061DZG6_THECC	O-fucosyltransferase family protein	PF10250: GDP-fucose protein O-fucosyltransferase	IPR019378: GDP-fucose protein O-fucosyltransferase; IPR024709: O-fucosyltransferase, plant		G	PF10250	IPR019378; IPR024709
TraesCS4B02G325300.1	1	***	tr|Q10S86|Q10S86_ORYSJ	Bromodomain containing protein, expressed	PF00439: Bromodomain	IPR001487: Bromodomain; IPR018359: Bromodomain, conserved site	GO:0005515 MF: protein binding	G	PF00439	IPR001487; IPR018359	GO:0005515
TraesCS5B02G365700.1	1	***	tr|Q0WRV2|Q0WRV2_ARATH	Mitochondrial transcription termination factor family protein	PF02536: mTERF	IPR003690: Transcription termination factor, mitochondrial/chloroplastic	GO:0003690 MF: double-stranded DNA binding;GO:0006355 BP: regulation of transcription, DNA-templated	G	PF02536	IPR003690	GO:0003690; GO:0006355
TraesCS7A02G420000.1	1	***	sp|Q59998|ATZN_SYNY3	Zinc-transporting ATPase	PF00122: E1-E2 ATPase; PF00702: haloacid dehalogenase-like hydrolase	IPR001757: P-type ATPase; IPR006121: Heavy metal-associated domain, HMA; IPR008250: P-type ATPase, A domain; IPR018303: P-type ATPase, phosphorylation site; IPR023214: HAD-like domain; IPR023298: P-type ATPase, transmembrane domain; IPR023299: P-type ATPase, cytoplasmic domain N; IPR027256: P-type ATPase, subfamily IB	GO:0000166 MF: nucleotide binding;GO:0006812 BP: cation transport;GO:0016021 CC: integral component of membrane;GO:0019829 MF: cation-transporting ATPase activity;GO:0030001 BP: metal ion transport;GO:0046872 MF: metal ion binding	G	PF00122; PF00702	IPR001757; IPR006121; IPR008250; IPR018303; IPR023214; IPR023298; IPR023299; IPR027256	GO:0000166; GO:0006812; GO:0016021; GO:0019829; GO:0030001; GO:0046872
TraesCS2B02G114900.1	1	***	tr|C6ZRQ9|C6ZRQ9_SOYBN	Protein kinase	PF07714: Protein tyrosine kinase	IPR000719: Protein kinase domain; IPR001245: Serine-threonine/tyrosine-protein kinase, catalytic domain; IPR011009: Protein kinase-like domain	GO:0004672 MF: protein kinase activity;GO:0005524 MF: ATP binding;GO:0006468 BP: protein phosphorylation	G	PF07714	IPR000719; IPR001245; IPR011009	GO:0004672; GO:0005524; GO:0006468
TraesCS7A02G164500.1	1	--*	sp|Q98631|RDRP_RDVF	RNA-directed RNA polymerase P1				G
TraesCS2D02G516300.1	1	***	tr|A0A199UE74|A0A199UE74_ANACO	Crossover junction endonuclease EME1B	PF02732: ERCC4 domain	IPR006166: ERCC4 domain	GO:0003677 MF: DNA binding;GO:0004518 MF: nuclease activity	G	PF02732	IPR006166	GO:0003677; GO:0004518
TraesCS2D02G516300.2	0	*-*	tr|A0A199UE74|A0A199UE74_ANACO	Crossover junction endonuclease EME1B	PF02732: ERCC4 domain	IPR006166: ERCC4 domain	GO:0003677 MF: DNA binding;GO:0004518 MF: nuclease activity	G	PF02732	IPR006166	GO:0003677; GO:0004518
TraesCS5D02G290400.1	1	***	AT5G20400.1	2-oxoglutarate (2OG) and Fe(II)-dependent oxygenase superfamily protein	PF14226: non-haem dioxygenase in morphine synthesis N-terminal; PF03171: 2OG-Fe(II) oxygenase superfamily	IPR005123: Oxoglutarate/iron-dependent dioxygenase; IPR026992: Non-haem dioxygenase N-terminal domain; IPR027443: Isopenicillin N synthase-like	GO:0016491 MF: oxidoreductase activity;GO:0055114 BP: oxidation-reduction process	G	PF14226; PF03171	IPR005123; IPR026992; IPR027443	GO:0016491; GO:0055114
TraesCS5B02G351000.1	0	--*	AT2G28290.6	P-loop containing nucleoside triphosphate hydrolases superfamily protein				G
TraesCS5B02G351000.2	1	***	tr|B6U3T0|B6U3T0_MAIZE	RNA binding protein	PF00076: RNA recognition motif. (a.k.a. RRM, RBD, or RNP domain); PF00098: Zinc knuckle	IPR000504: RNA recognition motif domain; IPR001878: Zinc finger, CCHC-type; IPR003954: RNA recognition motif domain, eukaryote	GO:0003676 MF: nucleic acid binding;GO:0008270 MF: zinc ion binding	TE?	PF00076; PF00098	IPR000504; IPR001878; IPR003954	GO:0003676; GO:0008270
TraesCS2B02G441800.1	1	*-*	AT5G45540.1	transmembrane protein, putative (DUF594)	PF13968: Domain of unknown function (DUF4220); PF04578: Protein of unknown function, DUF594	IPR007658: Protein of unknown function DUF594; IPR025315: Domain of unknown function DUF4220		G	PF13968; PF04578	IPR007658; IPR025315
TraesCS7A02G452800.2	1	***	tr|W5H688|W5H688_WHEAT	DNA polymerase alpha subunit B	PF08418: DNA polymerase alpha subunit B N-terminal; PF04042: DNA polymerase alpha/epsilon subunit B	IPR007185: DNA polymerase alpha/epsilon, subunit B; IPR013627: DNA polymerase alpha, subunit B N-terminal; IPR016722: DNA polymerase alpha, subunit B	GO:0003677 MF: DNA binding;GO:0003887 MF: DNA-directed DNA polymerase activity;GO:0006260 BP: DNA replication	G	PF08418; PF04042	IPR007185; IPR013627; IPR016722	GO:0003677; GO:0003887; GO:0006260
TraesCS7A02G452800.1	0	***	tr|W5H688|W5H688_WHEAT	DNA polymerase alpha subunit B	PF08418: DNA polymerase alpha subunit B N-terminal; PF04042: DNA polymerase alpha/epsilon subunit B	IPR007185: DNA polymerase alpha/epsilon, subunit B; IPR013627: DNA polymerase alpha, subunit B N-terminal; IPR016722: DNA polymerase alpha, subunit B	GO:0003677 MF: DNA binding;GO:0003887 MF: DNA-directed DNA polymerase activity;GO:0006260 BP: DNA replication	G	PF08418; PF04042	IPR007185; IPR013627; IPR016722	GO:0003677; GO:0003887; GO:0006260
TraesCS2B02G022700.1	1	***	AT2G45980.1	mesoderm induction early response protein				G
TraesCS3D02G151500.1	1	***	tr|M8BVC0|M8BVC0_AEGTA	Non-specific serine/threonine protein kinase	PF00069: Protein kinase domain; PF03822: NAF domain	IPR000719: Protein kinase domain; IPR004041: NAF domain; IPR008271: Serine/threonine-protein kinase, active site; IPR011009: Protein kinase-like domain; IPR017441: Protein kinase, ATP binding site; IPR018451: NAF/FISL domain	GO:0004672 MF: protein kinase activity;GO:0005524 MF: ATP binding;GO:0006468 BP: protein phosphorylation;GO:0007165 BP: signal transduction	G	PF00069; PF03822	IPR000719; IPR004041; IPR008271; IPR011009; IPR017441; IPR018451	GO:0004672; GO:0005524; GO:0006468; GO:0007165
TraesCS5D02G274400.1	1	***	AT2G44430.1	DNA-binding bromodomain-containing protein	PF00249: Myb-like DNA-binding domain; PF00439: Bromodomain	IPR001005: SANT/Myb domain; IPR001487: Bromodomain	GO:0005515 MF: protein binding	G	PF00249; PF00439	IPR001005; IPR001487	GO:0005515
TraesCS7A02G239300.1	1	*-*	tr|B7F983|B7F983_ORYSJ	cDNA, clone: J075123K08, full insert sequence	PF07762: Protein of unknown function (DUF1618)	IPR011676: Domain of unknown function DUF1618		G	PF07762	IPR011676
TraesCS5A02G047200.1	1	*-*	tr|A0A199VQD7|A0A199VQD7_ANACO	BAG family molecular chaperone regulator 7				G
TraesCS7D02G123400.1	1	***	tr|A2Y9Y7|A2Y9Y7_ORYSI	Heparanase	PF03662: Glycosyl hydrolase family 79, N-terminal domain	IPR005199: Glycoside hydrolase, family 79; IPR017853: Glycoside hydrolase superfamily	GO:0016020 CC: membrane;GO:0016798 MF: hydrolase activity, acting on glycosyl bonds	G	PF03662	IPR005199; IPR017853	GO:0016020; GO:0016798
TraesCS7D02G379200.1	1	***	tr|A0A060D6F1|A0A060D6F1_MAIZE	GRAS transcription factor	PF03514: GRAS domain family	IPR005202: Transcription factor GRAS		G	PF03514	IPR005202
TraesCS6D02G029000.1	1	--*	AT2G14710.1	F-box family protein		IPR001810: F-box domain	GO:0005515 MF: protein binding	TE?		IPR001810	GO:0005515
TraesCS3B02G100000.1	1	***	tr|A0A061DTZ5|A0A061DTZ5_THECC	Cytochrome P450 family protein	PF00067: Cytochrome P450	IPR001128: Cytochrome P450; IPR002401: Cytochrome P450, E-class, group I	GO:0005506 MF: iron ion binding;GO:0016705 MF: oxidoreductase activity, acting on paired donors, with incorporation or reduction of molecular oxygen;GO:0020037 MF: heme binding;GO:0055114 BP: oxidation-reduction process	G	PF00067	IPR001128; IPR002401	GO:0005506; GO:0016705; GO:0020037; GO:0055114
TraesCS3B02G549400.1	1	***	tr|F4IY42|F4IY42_ARATH	Amidohydrolase family	PF07969: Amidohydrolase family	IPR011059: Metal-dependent hydrolase, composite domain; IPR013108: Amidohydrolase 3; IPR032466: Metal-dependent hydrolase	GO:0016810 MF: hydrolase activity, acting on carbon-nitrogen (but not peptide) bonds	G	PF07969	IPR011059; IPR013108; IPR032466	GO:0016810
TraesCS3B02G549400.2	0	***	tr|F4IY42|F4IY42_ARATH	Amidohydrolase family	PF07969: Amidohydrolase family	IPR011059: Metal-dependent hydrolase, composite domain; IPR013108: Amidohydrolase 3; IPR032466: Metal-dependent hydrolase	GO:0016810 MF: hydrolase activity, acting on carbon-nitrogen (but not peptide) bonds	G	PF07969	IPR011059; IPR013108; IPR032466	GO:0016810
TraesCS7A02G367600.1	1	***	tr|M7Z2S3|M7Z2S3_TRIUA	Protein RMD5-like protein A	PF10607: CTLH/CRA C-terminal to LisH motif domain; PF13445: RING-type zinc-finger	IPR006594: LIS1 homology motif; IPR006595: CTLH, C-terminal LisH motif; IPR013083: Zinc finger, RING/FYVE/PHD-type; IPR013144: CRA domain; IPR024964: CTLH/CRA C-terminal to LisH motif domain; IPR027370: RING-type zinc-finger, LisH dimerisation motif	GO:0005515 MF: protein binding	G	PF10607; PF13445	IPR006594; IPR006595; IPR013083; IPR013144; IPR024964; IPR027370	GO:0005515
TraesCS5D02G265600.1	1	***	tr|A0A199ULF6|A0A199ULF6_ANACO	WPP domain-interacting protein 1				G
TraesCS5B02G184100.1	1	***	sp|Q4UL77|ISCS_RICFE	Cysteine desulfurase IscS	PF00266: Aminotransferase class-V	IPR000192: Aminotransferase class V domain; IPR010240: Cysteine desulfurase IscS; IPR015421: Pyridoxal phosphate-dependent transferase, major region, subdomain 1; IPR015422: Pyridoxal phosphate-dependent transferase, subdomain 2; IPR015424: Pyridoxal phosphate-dependent transferase; IPR016454: Cysteine desulfurase; IPR020578: Aminotransferase class-V, pyridoxal-phosphate binding site	GO:0003824 MF: catalytic activity;GO:0030170 MF: pyridoxal phosphate binding;GO:0031071 MF: cysteine desulfurase activity;GO:0044571 BP: [2Fe-2S] cluster assembly	G	PF00266	IPR000192; IPR010240; IPR015421; IPR015422; IPR015424; IPR016454; IPR020578	GO:0003824; GO:0030170; GO:0031071; GO:0044571
TraesCS6B02G244000.3	0	***	tr|M8ANK7|M8ANK7_TRIUA	Transcription factor GTE9	PF00439: Bromodomain; PF17035: Bromodomain extra-terminal - transcription regulation	IPR001487: Bromodomain; IPR027353: NET domain	GO:0005515 MF: protein binding	G	PF00439; PF17035	IPR001487; IPR027353	GO:0005515
TraesCS2D02G422200.1	1	***	tr|A0A1E5WIY9|A0A1E5WIY9_9POAL	Pentatricopeptide repeat-containing protein	PF01535: PPR repeat; PF17177: Pentacotripeptide-repeat region of PROPR	IPR002625: Smr domain; IPR002885: Pentatricopeptide repeat; IPR011990: Tetratricopeptide-like helical domain; IPR033443: Pentacotripeptide-repeat region of PROPR	GO:0005515 MF: protein binding	G	PF01535; PF17177	IPR002625; IPR002885; IPR011990; IPR033443	GO:0005515
TraesCS6B02G244000.6	0	***	tr|M8ANK7|M8ANK7_TRIUA	Transcription factor GTE9	PF00439: Bromodomain; PF17035: Bromodomain extra-terminal - transcription regulation	IPR001487: Bromodomain; IPR027353: NET domain	GO:0005515 MF: protein binding	G	PF00439; PF17035	IPR001487; IPR027353	GO:0005515
TraesCS6B02G244000.4	0	***	tr|M8ANK7|M8ANK7_TRIUA	Transcription factor GTE9	PF00439: Bromodomain; PF17035: Bromodomain extra-terminal - transcription regulation	IPR001487: Bromodomain; IPR027353: NET domain	GO:0005515 MF: protein binding	G	PF00439; PF17035	IPR001487; IPR027353	GO:0005515
TraesCS6B02G244000.5	0	***	tr|M8ANK7|M8ANK7_TRIUA	Transcription factor GTE9	PF00439: Bromodomain; PF17035: Bromodomain extra-terminal - transcription regulation	IPR001487: Bromodomain; IPR027353: NET domain	GO:0005515 MF: protein binding	G	PF00439; PF17035	IPR001487; IPR027353	GO:0005515
TraesCS7D02G097300.1	1	***	tr|A0A1D6SFL1|A0A1D6SFL1_WHEAT	Xyloglucan endotransglucosylase/hydrolase	PF00722: Glycosyl hydrolases family 16; PF06955: Xyloglucan endo-transglycosylase (XET) C-terminus	IPR000757: Glycoside hydrolase family 16; IPR008264: Beta-glucanase; IPR010713: Xyloglucan endo-transglycosylase, C-terminal; IPR013320: Concanavalin A-like lectin/glucanase domain; IPR016455: Xyloglucan endotransglucosylase/hydrolase	GO:0004553 MF: hydrolase activity, hydrolyzing O-glycosyl compounds;GO:0005618 CC: cell wall;GO:0005975 BP: carbohydrate metabolic process;GO:0006073 BP: cellular glucan metabolic process;GO:0010411 BP: xyloglucan metabolic process;GO:0016762 MF: xyloglucan:xyloglucosyl transferase activity;GO:0042546 BP: cell wall biogenesis;GO:0048046 CC: apoplast	G	PF00722; PF06955	IPR000757; IPR008264; IPR010713; IPR013320; IPR016455	GO:0004553; GO:0005618; GO:0005975; GO:0006073; GO:0010411; GO:0016762; GO:0042546; GO:0048046
TraesCS1B02G142800.2	0	***	tr|W5AAH8|W5AAH8_WHEAT	Peroxidase	PF00141: Peroxidase	IPR000823: Plant peroxidase; IPR002016: Haem peroxidase, plant/fungal/bacterial; IPR010255: Haem peroxidase; IPR019793: Peroxidases heam-ligand binding site; IPR019794: Peroxidase, active site	GO:0004601 MF: peroxidase activity;GO:0006979 BP: response to oxidative stress;GO:0020037 MF: heme binding;GO:0055114 BP: oxidation-reduction process	G	PF00141	IPR000823; IPR002016; IPR010255; IPR019793; IPR019794	GO:0004601; GO:0006979; GO:0020037; GO:0055114
TraesCS1B02G142800.1	1	***	tr|A0A1D5SK37|A0A1D5SK37_WHEAT	Peroxidase	PF00141: Peroxidase	IPR000823: Plant peroxidase; IPR002016: Haem peroxidase, plant/fungal/bacterial; IPR010255: Haem peroxidase; IPR019793: Peroxidases heam-ligand binding site; IPR019794: Peroxidase, active site	GO:0004601 MF: peroxidase activity;GO:0006979 BP: response to oxidative stress;GO:0020037 MF: heme binding;GO:0055114 BP: oxidation-reduction process	G	PF00141	IPR000823; IPR002016; IPR010255; IPR019793; IPR019794	GO:0004601; GO:0006979; GO:0020037; GO:0055114
TraesCS2A02G289100.1	1	***	tr|A0A1E5VAQ6|A0A1E5VAQ6_9POAL	Pentatricopeptide repeat-containing protein	PF01535: PPR repeat; PF13041: PPR repeat family	IPR002885: Pentatricopeptide repeat; IPR011990: Tetratricopeptide-like helical domain	GO:0005515 MF: protein binding	G	PF01535; PF13041	IPR002885; IPR011990	GO:0005515
TraesCS1D02G011700.1	0	***	tr|A0A1D5T1L8|A0A1D5T1L8_WHEAT	Methionine S-methyltransferase	PF13847: Methyltransferase domain; PF00155: Aminotransferase class I and II	IPR004839: Aminotransferase, class I/classII; IPR015421: Pyridoxal phosphate-dependent transferase, major region, subdomain 1; IPR015422: Pyridoxal phosphate-dependent transferase, subdomain 2; IPR015424: Pyridoxal phosphate-dependent transferase; IPR025714: Methyltransferase domain; IPR025779: Methionine S-methyltransferase; IPR029063: S-adenosyl-L-methionine-dependent methyltransferase	GO:0003824 MF: catalytic activity;GO:0008168 MF: methyltransferase activity;GO:0009058 BP: biosynthetic process;GO:0030170 MF: pyridoxal phosphate binding	G	PF13847; PF00155	IPR004839; IPR015421; IPR015422; IPR015424; IPR025714; IPR025779; IPR029063	GO:0003824; GO:0008168; GO:0009058; GO:0030170
TraesCS1D02G011700.2	0	***	tr|A0A1D5T1L7|A0A1D5T1L7_WHEAT	Methionine S-methyltransferase	PF13847: Methyltransferase domain; PF00155: Aminotransferase class I and II	IPR004839: Aminotransferase, class I/classII; IPR015421: Pyridoxal phosphate-dependent transferase, major region, subdomain 1; IPR015422: Pyridoxal phosphate-dependent transferase, subdomain 2; IPR015424: Pyridoxal phosphate-dependent transferase; IPR025714: Methyltransferase domain; IPR025779: Methionine S-methyltransferase; IPR029063: S-adenosyl-L-methionine-dependent methyltransferase	GO:0003824 MF: catalytic activity;GO:0008168 MF: methyltransferase activity;GO:0009058 BP: biosynthetic process;GO:0030170 MF: pyridoxal phosphate binding	G	PF13847; PF00155	IPR004839; IPR015421; IPR015422; IPR015424; IPR025714; IPR025779; IPR029063	GO:0003824; GO:0008168; GO:0009058; GO:0030170
TraesCS1D02G011700.3	1	***	tr|A0A1D5T1L6|A0A1D5T1L6_WHEAT	Methionine S-methyltransferase	PF13847: Methyltransferase domain; PF00155: Aminotransferase class I and II	IPR004839: Aminotransferase, class I/classII; IPR015421: Pyridoxal phosphate-dependent transferase, major region, subdomain 1; IPR015422: Pyridoxal phosphate-dependent transferase, subdomain 2; IPR015424: Pyridoxal phosphate-dependent transferase; IPR025714: Methyltransferase domain; IPR025779: Methionine S-methyltransferase; IPR029063: S-adenosyl-L-methionine-dependent methyltransferase	GO:0003824 MF: catalytic activity;GO:0008168 MF: methyltransferase activity;GO:0009058 BP: biosynthetic process;GO:0030170 MF: pyridoxal phosphate binding	G	PF13847; PF00155	IPR004839; IPR015421; IPR015422; IPR015424; IPR025714; IPR025779; IPR029063	GO:0003824; GO:0008168; GO:0009058; GO:0030170
TraesCS3D02G180800.1	1	***	tr|E3W6T3|E3W6T3_SESPO	Late embryogenesis abundant protein	PF03242: Late embryogenesis abundant protein	IPR004926: Late embryogenesis abundant protein, LEA5-type	GO:0006950 BP: response to stress	G	PF03242	IPR004926	GO:0006950
TraesCS6A02G270800.5	0	***	tr|D7MHY5|D7MHY5_ARALL	Kinase family protein	PF00069: Protein kinase domain	IPR000719: Protein kinase domain; IPR008271: Serine/threonine-protein kinase, active site; IPR011009: Protein kinase-like domain; IPR017441: Protein kinase, ATP binding site	GO:0004672 MF: protein kinase activity;GO:0005524 MF: ATP binding;GO:0006468 BP: protein phosphorylation	G	PF00069	IPR000719; IPR008271; IPR011009; IPR017441	GO:0004672; GO:0005524; GO:0006468
TraesCS6B02G224800.4	0	***	tr|A0A0P7IRQ3|A0A0P7IRQ3_9MOLU	Elongation factor 4	PF00009: Elongation factor Tu GTP binding domain; PF00679: Elongation factor G C-terminus	IPR000640: Translation elongation factor EFG, V domain; IPR000795: Transcription factor, GTP-binding domain; IPR005225: Small GTP-binding protein domain; IPR009000: Translation protein, beta-barrel domain; IPR009022: Elongation factor G, III-V domain; IPR027417: P-loop containing nucleoside triphosphate hydrolase; IPR031157: Tr-type G domain, conserved site	GO:0003924 MF: GTPase activity;GO:0005525 MF: GTP binding	G	PF00009; PF00679	IPR000640; IPR000795; IPR005225; IPR009000; IPR009022; IPR027417; IPR031157	GO:0003924; GO:0005525
TraesCS3D02G348800.2	1	***	tr|R7WE07|R7WE07_AEGTA	Ankyrin repeat-containing protein	PF12796: Ankyrin repeats (3 copies); PF13962: Domain of unknown function	IPR002110: Ankyrin repeat; IPR020683: Ankyrin repeat-containing domain; IPR026961: PGG domain	GO:0005515 MF: protein binding	G	PF12796; PF13962	IPR002110; IPR020683; IPR026961	GO:0005515
TraesCS6A02G270800.6	1	***	tr|D7MHY5|D7MHY5_ARALL	Kinase family protein	PF00069: Protein kinase domain	IPR000719: Protein kinase domain; IPR008271: Serine/threonine-protein kinase, active site; IPR011009: Protein kinase-like domain; IPR017441: Protein kinase, ATP binding site	GO:0004672 MF: protein kinase activity;GO:0005524 MF: ATP binding;GO:0006468 BP: protein phosphorylation	G	PF00069	IPR000719; IPR008271; IPR011009; IPR017441	GO:0004672; GO:0005524; GO:0006468
TraesCS3D02G348800.1	0	***	tr|R7WE07|R7WE07_AEGTA	Ankyrin repeat-containing protein	PF12796: Ankyrin repeats (3 copies); PF13962: Domain of unknown function	IPR002110: Ankyrin repeat; IPR020683: Ankyrin repeat-containing domain; IPR026961: PGG domain	GO:0005515 MF: protein binding	G	PF12796; PF13962	IPR002110; IPR020683; IPR026961	GO:0005515
TraesCS6D02G303700.1	1	***	tr|Q851G2|Q851G2_ORYSJ	Cytochrome P450 family protein, expressed	PF00067: Cytochrome P450	IPR001128: Cytochrome P450; IPR002401: Cytochrome P450, E-class, group I; IPR017972: Cytochrome P450, conserved site	GO:0005506 MF: iron ion binding;GO:0016705 MF: oxidoreductase activity, acting on paired donors, with incorporation or reduction of molecular oxygen;GO:0020037 MF: heme binding;GO:0055114 BP: oxidation-reduction process	G	PF00067	IPR001128; IPR002401; IPR017972	GO:0005506; GO:0016705; GO:0020037; GO:0055114
TraesCS3D02G061900.1	1	***	tr|R4WM32|R4WM32_9POAL	Cytochrome P450	PF00067: Cytochrome P450	IPR001128: Cytochrome P450; IPR002401: Cytochrome P450, E-class, group I; IPR017972: Cytochrome P450, conserved site	GO:0005506 MF: iron ion binding;GO:0016705 MF: oxidoreductase activity, acting on paired donors, with incorporation or reduction of molecular oxygen;GO:0020037 MF: heme binding;GO:0055114 BP: oxidation-reduction process	G	PF00067	IPR001128; IPR002401; IPR017972	GO:0005506; GO:0016705; GO:0020037; GO:0055114
TraesCS6D02G303700.2	0	***	tr|Q851G2|Q851G2_ORYSJ	Cytochrome P450 family protein, expressed	PF00067: Cytochrome P450	IPR001128: Cytochrome P450	GO:0005506 MF: iron ion binding;GO:0016705 MF: oxidoreductase activity, acting on paired donors, with incorporation or reduction of molecular oxygen;GO:0020037 MF: heme binding;GO:0055114 BP: oxidation-reduction process	G	PF00067	IPR001128	GO:0005506; GO:0016705; GO:0020037; GO:0055114
TraesCS5A02G103900.1	0	***	tr|G7ITD0|G7ITD0_MEDTR	Cyclin T1		IPR013763: Cyclin-like		G		IPR013763
TraesCS4D02G231900.1	1	***	tr|H1ZN78|H1ZN78_9MAGN	GAGA-binding transcriptional activator	PF06217: GAGA binding protein-like family	IPR010409: GAGA-binding transcriptional activator; IPR015943: WD40/YVTN repeat-like-containing domain	GO:0005515 MF: protein binding	G	PF06217	IPR010409; IPR015943	GO:0005515
TraesCS5A02G103900.2	1	***	AT5G45190.1	Cyclin family protein	PF00134: Cyclin, N-terminal domain	IPR006671: Cyclin, N-terminal; IPR013763: Cyclin-like; IPR015429: Cyclin L/T	GO:0000079 BP: regulation of cyclin-dependent protein serine/threonine kinase activity;GO:0006355 BP: regulation of transcription, DNA-templated;GO:0019901 MF: protein kinase binding	G	PF00134	IPR006671; IPR013763; IPR015429	GO:0000079; GO:0006355; GO:0019901
TraesCS5A02G338500.1	1	***	tr|D8L9R1|D8L9R1_WHEAT	Receptor-like protein kinase, putative,expressed	PF01657: Salt stress response/antifungal; PF00069: Protein kinase domain	IPR000719: Protein kinase domain; IPR002902: Gnk2-homologous domain; IPR008271: Serine/threonine-protein kinase, active site; IPR011009: Protein kinase-like domain; IPR017441: Protein kinase, ATP binding site	GO:0004672 MF: protein kinase activity;GO:0005524 MF: ATP binding;GO:0006468 BP: protein phosphorylation	G	PF01657; PF00069	IPR000719; IPR002902; IPR008271; IPR011009; IPR017441	GO:0004672; GO:0005524; GO:0006468
TraesCS6B02G224800.1	0	***	tr|A0A0P7IRQ3|A0A0P7IRQ3_9MOLU	Elongation factor 4	PF00009: Elongation factor Tu GTP binding domain; PF03144: Elongation factor Tu domain 2; PF00679: Elongation factor G C-terminus	IPR000640: Translation elongation factor EFG, V domain; IPR000795: Transcription factor, GTP-binding domain; IPR004161: Translation elongation factor EFTu-like, domain 2; IPR005225: Small GTP-binding protein domain; IPR006298: GTP-binding protein TypA; IPR009000: Translation protein, beta-barrel domain; IPR009022: Elongation factor G, III-V domain; IPR027417: P-loop containing nucleoside triphosp…	GO:0003924 MF: GTPase activity;GO:0005525 MF: GTP binding	G	PF00009; PF03144; PF00679	IPR000640; IPR000795; IPR004161; IPR005225; IPR006298; IPR009000; IPR009022; IPR027417; IPR031157	GO:0003924; GO:0005525
TraesCS4D02G273200.4	1	***	tr|F4JDC3|F4JDC3_ARATH	Evolutionarily conserved C-terminal region 2	PF04146: YT521-B-like domain	IPR007275: YTH domain	GO:0003723 MF: RNA binding	G	PF04146	IPR007275	GO:0003723
TraesCS4D02G273200.5	0	***	AT3G13460.1	evolutionarily conserved C-terminal region 2	PF04146: YT521-B-like domain	IPR007275: YTH domain	GO:0003723 MF: RNA binding	G	PF04146	IPR007275	GO:0003723
TraesCS3B02G477100.2	1	***	sp|A7HMM1|BIOF_FERNB	8-amino-7-oxononanoate synthase	PF00155: Aminotransferase class I and II	IPR001917: Aminotransferase, class-II, pyridoxal-phosphate binding site; IPR004839: Aminotransferase, class I/classII; IPR015421: Pyridoxal phosphate-dependent transferase, major region, subdomain 1; IPR015422: Pyridoxal phosphate-dependent transferase, subdomain 2; IPR015424: Pyridoxal phosphate-dependent transferase	GO:0003824 MF: catalytic activity;GO:0008152 BP: metabolic process;GO:0009058 BP: biosynthetic process;GO:0016740 MF: transferase activity;GO:0030170 MF: pyridoxal phosphate binding	G	PF00155	IPR001917; IPR004839; IPR015421; IPR015422; IPR015424	GO:0003824; GO:0008152; GO:0009058; GO:0016740; GO:0030170
TraesCS4D02G213500.1	1	***	tr|X5IB44|X5IB44_ORYSJ	Enolase-like protein	PF03952: Enolase, N-terminal domain; PF00113: Enolase, C-terminal TIM barrel domain	IPR000941: Enolase; IPR020810: Enolase, C-terminal TIM barrel domain; IPR020811: Enolase, N-terminal; IPR029017: Enolase N-terminal domain-like; IPR029065: Enolase C-terminal domain-like	GO:0000015 CC: phosphopyruvate hydratase complex;GO:0000287 MF: magnesium ion binding;GO:0004634 MF: phosphopyruvate hydratase activity;GO:0006096 BP: glycolytic process	G	PF03952; PF00113	IPR000941; IPR020810; IPR020811; IPR029017; IPR029065	GO:0000015; GO:0000287; GO:0004634; GO:0006096
TraesCS1B02G298300.1	1	***	tr|A0A0K9Q4T7|A0A0K9Q4T7_ZOSMR	GPN-loop GTPase-like protein	PF03029: Conserved hypothetical ATP binding protein	IPR004130: GPN-loop GTPase; IPR027417: P-loop containing nucleoside triphosphate hydrolase		G	PF03029	IPR004130; IPR027417
TraesCS3B02G477100.1	0	***	sp|A7HMM1|BIOF_FERNB	8-amino-7-oxononanoate synthase	PF00155: Aminotransferase class I and II	IPR001917: Aminotransferase, class-II, pyridoxal-phosphate binding site; IPR004839: Aminotransferase, class I/classII; IPR015421: Pyridoxal phosphate-dependent transferase, major region, subdomain 1; IPR015422: Pyridoxal phosphate-dependent transferase, subdomain 2; IPR015424: Pyridoxal phosphate-dependent transferase	GO:0003824 MF: catalytic activity;GO:0008152 BP: metabolic process;GO:0009058 BP: biosynthetic process;GO:0016740 MF: transferase activity;GO:0030170 MF: pyridoxal phosphate binding	G	PF00155	IPR001917; IPR004839; IPR015421; IPR015422; IPR015424	GO:0003824; GO:0008152; GO:0009058; GO:0016740; GO:0030170
TraesCS4B02G357200.1	1	***	tr|M7YNT1|M7YNT1_TRIUA	KHG/KDPG aldolase	PF01081: KDPG and KHG aldolase	IPR000887: KDPG/KHG aldolase; IPR013785: Aldolase-type TIM barrel	GO:0003824 MF: catalytic activity;GO:0008152 BP: metabolic process;GO:0016829 MF: lyase activity	G	PF01081	IPR000887; IPR013785	GO:0003824; GO:0008152; GO:0016829
TraesCS3D02G495100.1	1	***	tr|F4IY42|F4IY42_ARATH	Amidohydrolase family	PF07969: Amidohydrolase family	IPR011059: Metal-dependent hydrolase, composite domain; IPR013108: Amidohydrolase 3; IPR032466: Metal-dependent hydrolase	GO:0016810 MF: hydrolase activity, acting on carbon-nitrogen (but not peptide) bonds	G	PF07969	IPR011059; IPR013108; IPR032466	GO:0016810
TraesCS3D02G495100.2	0	***	tr|F4IY42|F4IY42_ARATH	Amidohydrolase family	PF07969: Amidohydrolase family	IPR011059: Metal-dependent hydrolase, composite domain; IPR013108: Amidohydrolase 3; IPR032466: Metal-dependent hydrolase	GO:0016810 MF: hydrolase activity, acting on carbon-nitrogen (but not peptide) bonds	G	PF07969	IPR011059; IPR013108; IPR032466	GO:0016810
TraesCS4D02G275400.1	1	*-*	tr|A0A061DQM7|A0A061DQM7_THECC	Kinase interacting (KIP1-like) family protein, putative	PF07765: KIP1-like protein	IPR011684: Protein Networked (NET), actin-binding (NAB) domain	GO:0003779 MF: actin binding	G	PF07765	IPR011684	GO:0003779
TraesCS1B02G427900.1	1	***	tr|A0A1D5SAE3|A0A1D5SAE3_WHEAT	60S ribosomal protein L18a	PF01775: Ribosomal proteins 50S-L18Ae/60S-L20/60S-L18A	IPR021138: 60S ribosomal protein L18a/ L20, eukaryotes; IPR023573: Ribosomal protein 50S-L18Ae/60S-L20/60S-L18A; IPR028877: 50S ribosomal protein L18Ae/60S ribosomal protein L20 and L18a	GO:0003735 MF: structural constituent of ribosome;GO:0005840 CC: ribosome;GO:0006412 BP: translation	G	PF01775	IPR021138; IPR023573; IPR028877	GO:0003735; GO:0005840; GO:0006412
TraesCS4A02G139700.2	0	***	tr|A0A1D5XA77|A0A1D5XA77_WHEAT	ATP-dependent Clp protease proteolytic subunit	PF00574: Clp protease	IPR001907: ATP-dependent Clp protease proteolytic subunit; IPR023562: Clp protease proteolytic subunit /Translocation-enhancing protein TepA; IPR029045: ClpP/crotonase-like domain	GO:0004252 MF: serine-type endopeptidase activity;GO:0006508 BP: proteolysis	G	PF00574	IPR001907; IPR023562; IPR029045	GO:0004252; GO:0006508
TraesCS4A02G139700.1	0	***	tr|A0A1D5XA76|A0A1D5XA76_WHEAT	ATP-dependent Clp protease proteolytic subunit	PF00574: Clp protease	IPR001907: ATP-dependent Clp protease proteolytic subunit; IPR023562: Clp protease proteolytic subunit /Translocation-enhancing protein TepA; IPR029045: ClpP/crotonase-like domain	GO:0004252 MF: serine-type endopeptidase activity;GO:0006508 BP: proteolysis	G	PF00574	IPR001907; IPR023562; IPR029045	GO:0004252; GO:0006508
TraesCS3A02G494800.1	1	***	tr|Q5QPZ5|Q5QPZ5_WHEAT	Glycosyltransferase	PF04577: Protein of unknown function (DUF563)	IPR007657: Glycosyltransferase 61	GO:0016757 MF: transferase activity, transferring glycosyl groups	G	PF04577	IPR007657	GO:0016757
TraesCS7B02G432500.1	0	***	tr|B6T5H5|B6T5H5_MAIZE	Mis12 protein	PF05859: Mis12 protein	IPR008685: Centromere protein Mis12	GO:0000775 CC: chromosome, centromeric region;GO:0005634 CC: nucleus;GO:0007049 BP: cell cycle	G	PF05859	IPR008685	GO:0000775; GO:0005634; GO:0007049; GO:0007067
TraesCS4A02G325100.1	1	*-*	tr|M8AZK6|M8AZK6_TRIUA	Methyl-CpG-binding domain-containing protein 9				G
TraesCS4D02G283300.2	1	***	tr|A0A1E5VNJ6|A0A1E5VNJ6_9POAL	Pentatricopeptide repeat-containing protein	PF01535: PPR repeat; PF13041: PPR repeat family; PF12854: PPR repeat	IPR002885: Pentatricopeptide repeat; IPR011990: Tetratricopeptide-like helical domain	GO:0005515 MF: protein binding	G	PF01535; PF13041; PF12854	IPR002885; IPR011990	GO:0005515
TraesCS4B02G124000.1	1	***	tr|A0A0K9NPH8|A0A0K9NPH8_ZOSMR	Scarecrow transcription factor family protein	PF03514: GRAS domain family	IPR005202: Transcription factor GRAS		G	PF03514	IPR005202
TraesCS3D02G102400.1	1	*-*	tr|M8D8E3|M8D8E3_AEGTA	Zinc finger CCCH domain-containing protein 4	PF07762: Protein of unknown function (DUF1618)	IPR011676: Domain of unknown function DUF1618		TE?	PF07762	IPR011676
TraesCS2B02G521600.1	0	***	tr|N1QRC7|N1QRC7_AEGTA	Adenosylhomocysteinase	PF05221: S-adenosyl-L-homocysteine hydrolase; PF00670: S-adenosyl-L-homocysteine hydrolase, NAD binding domain	IPR000043: Adenosylhomocysteinase-like; IPR015878: S-adenosyl-L-homocysteine hydrolase, NAD binding domain; IPR016040: NAD(P)-binding domain; IPR020082: S-adenosyl-L-homocysteine hydrolase, conserved site; IPR034373: Adenosylhomocysteinase	GO:0004013 MF: adenosylhomocysteinase activity;GO:0006730 BP: one-carbon metabolic process;GO:0019510 BP: S-adenosylhomocysteine catabolic process;GO:0051287 MF: NAD binding	G	PF05221; PF00670	IPR000043; IPR015878; IPR016040; IPR020082; IPR034373	GO:0004013; GO:0006730; GO:0019510; GO:0051287
TraesCS2B02G521600.2	1	***	tr|N1QRC7|N1QRC7_AEGTA	Adenosylhomocysteinase	PF05221: S-adenosyl-L-homocysteine hydrolase; PF00670: S-adenosyl-L-homocysteine hydrolase, NAD binding domain	IPR000043: Adenosylhomocysteinase-like; IPR015878: S-adenosyl-L-homocysteine hydrolase, NAD binding domain; IPR016040: NAD(P)-binding domain; IPR020082: S-adenosyl-L-homocysteine hydrolase, conserved site; IPR034373: Adenosylhomocysteinase	GO:0004013 MF: adenosylhomocysteinase activity;GO:0006730 BP: one-carbon metabolic process;GO:0019510 BP: S-adenosylhomocysteine catabolic process;GO:0051287 MF: NAD binding	G	PF05221; PF00670	IPR000043; IPR015878; IPR016040; IPR020082; IPR034373	GO:0004013; GO:0006730; GO:0019510; GO:0051287
TraesCS2B02G521600.3	0	***	tr|W5B7Z6|W5B7Z6_WHEAT	Adenosylhomocysteinase	PF05221: S-adenosyl-L-homocysteine hydrolase; PF00670: S-adenosyl-L-homocysteine hydrolase, NAD binding domain	IPR000043: Adenosylhomocysteinase-like; IPR015878: S-adenosyl-L-homocysteine hydrolase, NAD binding domain; IPR016040: NAD(P)-binding domain; IPR020082: S-adenosyl-L-homocysteine hydrolase, conserved site	GO:0004013 MF: adenosylhomocysteinase activity;GO:0006730 BP: one-carbon metabolic process	G	PF05221; PF00670	IPR000043; IPR015878; IPR016040; IPR020082	GO:0004013; GO:0006730
TraesCS2B02G242900.1	1	--*	sp|P41977|SODM2_CAEEL	Superoxide dismutase [Mn] 2, mitochondrial	PF12274: Protein of unknown function (DUF3615)	IPR022059: Protein of unknown function DUF3615		G	PF12274	IPR022059
TraesCS3A02G058200.1	1	***	tr|A0A0K9NTZ0|A0A0K9NTZ0_ZOSMR	Mitochondrial carrier protein, expressed	PF00153: Mitochondrial carrier protein	IPR002067: Mitochondrial carrier protein; IPR018108: Mitochondrial substrate/solute carrier; IPR023395: Mitochondrial carrier domain	GO:0055085 BP: transmembrane transport	G	PF00153	IPR002067; IPR018108; IPR023395	GO:0055085
TraesCS2B02G037400.1	1	***	tr|A0A0B0MGQ5|A0A0B0MGQ5_GOSAR	Glutamyl-tRNA (Gln) amidotransferase subunit A	PF01425: Amidase	IPR023631: Amidase signature domain		G	PF01425	IPR023631
TraesCS5D02G239700.1	1	***	tr|Q6PRD0|Q6PRD0_ORYSJ	Pentatricopeptide repeat protein	PF13041: PPR repeat family; PF01535: PPR repeat	IPR002885: Pentatricopeptide repeat; IPR011990: Tetratricopeptide-like helical domain	GO:0005515 MF: protein binding	G	PF13041; PF01535	IPR002885; IPR011990	GO:0005515
TraesCS2A02G323200.1	1	***	tr|G7JMM8|G7JMM8_MEDTR	BTB/POZ and TAZ domain protein	PF00651: BTB/POZ domain; PF02135: TAZ zinc finger	IPR000197: Zinc finger, TAZ-type; IPR000210: BTB/POZ domain; IPR011333: SKP1/BTB/POZ domain	GO:0003712 MF: transcription cofactor activity;GO:0004402 MF: histone acetyltransferase activity;GO:0005515 MF: protein binding;GO:0005634 CC: nucleus;GO:0006355 BP: regulation of transcription, DNA-templated;GO:0008270 MF: zinc ion binding	G	PF00651; PF02135	IPR000197; IPR000210; IPR011333	GO:0003712; GO:0004402; GO:0005515; GO:0005634; GO:0006355; GO:0008270
TraesCS6A02G092800.1	1	***	tr|K7NBR3|K7NBR3_SIRGR	Ripening-related protein		IPR009009: RlpA-like protein, double-psi beta-barrel domain		G		IPR009009
TraesCS3B02G278200.1	1	***	tr|A0A077RYU3|A0A077RYU3_WHEAT	Cytidine deaminase	PF00383: Cytidine and deoxycytidylate deaminase zinc-binding region; PF08211: Cytidine and deoxycytidylate deaminase zinc-binding region	IPR002125: Cytidine and deoxycytidylate deaminases, zinc-binding; IPR006263: Cytidine deaminase, homodimeric; IPR013171: Cytidine/deoxycytidylate deaminase, zinc-binding domain; IPR016192: APOBEC/CMP deaminase, zinc-binding; IPR016193: Cytidine deaminase-like	GO:0003824 MF: catalytic activity;GO:0004126 MF: cytidine deaminase activity;GO:0008270 MF: zinc ion binding;GO:0009972 BP: cytidine deamination;GO:0016787 MF: hydrolase activity	G	PF00383; PF08211	IPR002125; IPR006263; IPR013171; IPR016192; IPR016193	GO:0003824; GO:0004126; GO:0008270; GO:0009972; GO:0016787
TraesCS5A02G532500.1	0	***	tr|A0A1E5ULC9|A0A1E5ULC9_9POAL	Mediator of RNA polymerase II transcription subunit 12	PF09497: Transcription mediator complex subunit Med12	IPR019035: Mediator complex, subunit Med12	GO:0001104 MF: RNA polymerase II transcription cofactor activity;GO:0006357 BP: regulation of transcription from RNA polymerase II promoter;GO:0016592 CC: mediator complex	G	PF09497	IPR019035	GO:0001104; GO:0006357; GO:0016592
TraesCS3A02G382800.2	0	***	sp|O80436|PTR29_ARATH	Protein NRT1/ PTR FAMILY 5.5	PF00854: POT family	IPR000109: Proton-dependent oligopeptide transporter family; IPR018456: PTR2 family proton/oligopeptide symporter, conserved site; IPR020846: Major facilitator superfamily domain	GO:0005215 MF: transporter activity;GO:0006810 BP: transport;GO:0006857 BP: oligopeptide transport;GO:0016020 CC: membrane	G	PF00854	IPR000109; IPR018456; IPR020846	GO:0005215; GO:0006810; GO:0006857; GO:0016020
TraesCS3A02G382800.1	1	***	sp|O80436|PTR29_ARATH	Protein NRT1/ PTR FAMILY 5.5	PF00854: POT family	IPR000109: Proton-dependent oligopeptide transporter family; IPR018456: PTR2 family proton/oligopeptide symporter, conserved site; IPR020846: Major facilitator superfamily domain	GO:0005215 MF: transporter activity;GO:0006810 BP: transport;GO:0006857 BP: oligopeptide transport;GO:0016020 CC: membrane	G	PF00854	IPR000109; IPR018456; IPR020846	GO:0005215; GO:0006810; GO:0006857; GO:0016020
TraesCS5A02G532500.2	1	***	tr|A0A1E5ULC9|A0A1E5ULC9_9POAL	Mediator of RNA polymerase II transcription subunit 12	PF09497: Transcription mediator complex subunit Med12	IPR019035: Mediator complex, subunit Med12	GO:0001104 MF: RNA polymerase II transcription cofactor activity;GO:0006357 BP: regulation of transcription from RNA polymerase II promoter;GO:0016592 CC: mediator complex	G	PF09497	IPR019035	GO:0001104; GO:0006357; GO:0016592
TraesCS1A02G103900.1	1	***	tr|B9R6R5|B9R6R5_RICCO	Receptor protein kinase, putative	PF08263: Leucine rich repeat N-terminal domain; PF00560: Leucine Rich Repeat; PF13855: Leucine rich repeat; PF00069: Protein kinase domain	IPR000719: Protein kinase domain; IPR001611: Leucine-rich repeat; IPR008271: Serine/threonine-protein kinase, active site; IPR011009: Protein kinase-like domain; IPR013210: Leucine-rich repeat-containing N-terminal, plant-type; IPR017441: Protein kinase, ATP binding site; IPR032675: Leucine-rich repeat domain, L domain-like	GO:0004672 MF: protein kinase activity;GO:0005515 MF: protein binding;GO:0005524 MF: ATP binding;GO:0006468 BP: protein phosphorylation	G	PF08263; PF00560; PF13855; PF00069	IPR000719; IPR001611; IPR008271; IPR011009; IPR013210; IPR017441; IPR032675	GO:0004672; GO:0005515; GO:0005524; GO:0006468
TraesCS4B02G054400.1	1	***	tr|Q657Z1|Q657Z1_ORYSJ	Carbohydrate kinase-like	PF00294: pfkB family carbohydrate kinase	IPR011611: Carbohydrate kinase PfkB; IPR029056: Ribokinase-like		G	PF00294	IPR011611; IPR029056
TraesCS1A02G331800.1	1	***	tr|A0A059Q0X1|A0A059Q0X1_9POAL	Cellulose synthase	PF13641: Glycosyltransferase like family 2	IPR029044: Nucleotide-diphospho-sugar transferases		G	PF13641	IPR029044
TraesCS3A02G136800.1	1	***	sp|Q9UX93|RL5_SULSO	50S ribosomal protein L5	PF00281: Ribosomal protein L5; PF00673: ribosomal L5P family C-terminus	IPR002132: Ribosomal protein L5; IPR020929: Ribosomal protein L5, conserved site; IPR022803: Ribosomal protein L5 domain; IPR031309: Ribosomal protein L5, C-terminal; IPR031310: Ribosomal protein L5, N-terminal	GO:0003735 MF: structural constituent of ribosome;GO:0005622 CC: intracellular;GO:0005840 CC: ribosome;GO:0006412 BP: translation	G	PF00281; PF00673	IPR002132; IPR020929; IPR022803; IPR031309; IPR031310	GO:0003735; GO:0005622; GO:0005840; GO:0006412
TraesCS4B02G221300.2	0	***	tr|B9RM01|B9RM01_RICCO	Type II inositol 5-phosphatase, putative		IPR001680: WD40 repeat; IPR005135: Endonuclease/exonuclease/phosphatase; IPR015943: WD40/YVTN repeat-like-containing domain	GO:0005515 MF: protein binding	TE?		IPR001680; IPR005135; IPR015943	GO:0005515
TraesCS5B02G499900.3	0	***	tr|Q10J32|Q10J32_ORYSJ	Calmodulin-binding protein, putative, expressed	PF07887: Calmodulin binding protein-like	IPR012416: CALMODULIN-BINDING PROTEIN60	GO:0005516 MF: calmodulin binding;GO:0006950 BP: response to stress	G	PF07887	IPR012416	GO:0005516; GO:0006950
TraesCS5A02G010200.1	1	***	tr|G7JNP0|G7JNP0_MEDTR	SacI-like domain protein/WW domain protein	PF02383: SacI homology domain; PF00397: WW domain	IPR001202: WW domain; IPR002013: SAC domain	GO:0005515 MF: protein binding;GO:0042578 MF: phosphoric ester hydrolase activity	G	PF02383; PF00397	IPR001202; IPR002013	GO:0005515; GO:0042578
TraesCS5A02G104900.1	1	***	tr|B4FAQ8|B4FAQ8_MAIZE	WRKY transcription factor	PF03106: WRKY DNA -binding domain	IPR003657: WRKY domain	GO:0003700 MF: transcription factor activity, sequence-specific DNA binding;GO:0006355 BP: regulation of transcription, DNA-templated;GO:0043565 MF: sequence-specific DNA binding	G	PF03106	IPR003657	GO:0003700; GO:0006355; GO:0043565
TraesCS1B02G422100.1	1	***	tr|A0A0E0IEZ5|A0A0E0IEZ5_ORYNI	Purple acid phosphatase	PF16656: Purple acid Phosphatase, N-terminal domain; PF00149: Calcineurin-like phosphoesterase; PF14008: Iron/zinc purple acid phosphatase-like protein C	IPR004843: Calcineurin-like phosphoesterase domain, ApaH type; IPR008963: Purple acid phosphatase-like, N-terminal; IPR015914: Purple acid phosphatase, N-terminal; IPR025733: Iron/zinc purple acid phosphatase-like C-terminal domain; IPR029052: Metallo-dependent phosphatase-like	GO:0003993 MF: acid phosphatase activity;GO:0016787 MF: hydrolase activity;GO:0046872 MF: metal ion binding	G	PF16656; PF00149; PF14008	IPR004843; IPR008963; IPR015914; IPR025733; IPR029052	GO:0003993; GO:0016787; GO:0046872
TraesCS5A02G318500.3	1	***	tr|A0A1D5YJT1|A0A1D5YJT1_WHEAT	NEDD8-activating enzyme E1 regulatory subunit	PF00899: ThiF family	IPR000594: THIF-type NAD/FAD binding fold; IPR030667: NEDD8-activating enzyme E1 regulatory subunit APP-BP1	GO:0008641 MF: small protein activating enzyme activity;GO:0019781 MF: NEDD8 activating enzyme activity;GO:0045116 BP: protein neddylation	G	PF00899	IPR000594; IPR030667	GO:0008641; GO:0019781; GO:0045116
TraesCS5A02G318500.2	0	***	tr|M7ZLZ2|M7ZLZ2_TRIUA	NEDD8-activating enzyme E1 regulatory subunit		IPR000594: THIF-type NAD/FAD binding fold; IPR030667: NEDD8-activating enzyme E1 regulatory subunit APP-BP1	GO:0008641 MF: small protein activating enzyme activity;GO:0019781 MF: NEDD8 activating enzyme activity;GO:0045116 BP: protein neddylation	G		IPR000594; IPR030667	GO:0008641; GO:0019781; GO:0045116
TraesCS5A02G318500.1	0	***	tr|A0A1D5YJT2|A0A1D5YJT2_WHEAT	NEDD8-activating enzyme E1 regulatory subunit	PF00899: ThiF family	IPR000594: THIF-type NAD/FAD binding fold; IPR030667: NEDD8-activating enzyme E1 regulatory subunit APP-BP1	GO:0008641 MF: small protein activating enzyme activity;GO:0019781 MF: NEDD8 activating enzyme activity;GO:0045116 BP: protein neddylation	G	PF00899	IPR000594; IPR030667	GO:0008641; GO:0019781; GO:0045116
TraesCS6D02G171700.1	1	***	AT2G45260.1	myosin-4 protein (DUF641)	PF04859: Plant protein of unknown function (DUF641)	IPR006943: Domain of unknown function DUF641, plant		G	PF04859	IPR006943
TraesCS5A02G318500.4	0	***	tr|A0A1D5YJT1|A0A1D5YJT1_WHEAT	NEDD8-activating enzyme E1 regulatory subunit	PF00899: ThiF family	IPR000594: THIF-type NAD/FAD binding fold	GO:0008641 MF: small protein activating enzyme activity	G	PF00899	IPR000594	GO:0008641
TraesCS2D02G198100.1	0	***	tr|B7ZZZ6|B7ZZZ6_MAIZE	WRKY transcription factor	PF03106: WRKY DNA -binding domain	IPR003657: WRKY domain	GO:0003700 MF: transcription factor activity, sequence-specific DNA binding;GO:0006355 BP: regulation of transcription, DNA-templated;GO:0043565 MF: sequence-specific DNA binding	G	PF03106	IPR003657	GO:0003700; GO:0006355; GO:0043565
TraesCS2D02G198100.3	0	***	tr|B7ZZZ6|B7ZZZ6_MAIZE	WRKY transcription factor	PF03106: WRKY DNA -binding domain	IPR003657: WRKY domain	GO:0003700 MF: transcription factor activity, sequence-specific DNA binding;GO:0006355 BP: regulation of transcription, DNA-templated;GO:0043565 MF: sequence-specific DNA binding	G	PF03106	IPR003657	GO:0003700; GO:0006355; GO:0043565
TraesCS2D02G198100.2	0	***	tr|B7ZZZ6|B7ZZZ6_MAIZE	WRKY transcription factor	PF03106: WRKY DNA -binding domain	IPR003657: WRKY domain	GO:0003700 MF: transcription factor activity, sequence-specific DNA binding;GO:0006355 BP: regulation of transcription, DNA-templated;GO:0043565 MF: sequence-specific DNA binding	G	PF03106	IPR003657	GO:0003700; GO:0006355; GO:0043565
TraesCS2D02G198100.4	1	***	tr|B7ZZZ6|B7ZZZ6_MAIZE	WRKY transcription factor	PF03106: WRKY DNA -binding domain	IPR003657: WRKY domain	GO:0003700 MF: transcription factor activity, sequence-specific DNA binding;GO:0006355 BP: regulation of transcription, DNA-templated;GO:0043565 MF: sequence-specific DNA binding	G	PF03106	IPR003657	GO:0003700; GO:0006355; GO:0043565
TraesCS3B02G045900.1	1	***	tr|Q943R3|Q943R3_ORYSJ	Calmodulin-binding protein-like	PF07887: Calmodulin binding protein-like	IPR012416: CALMODULIN-BINDING PROTEIN60	GO:0005516 MF: calmodulin binding;GO:0006950 BP: response to stress	G	PF07887	IPR012416	GO:0005516; GO:0006950
TraesCS3B02G178200.3	0	*-*	sp|P71377|FTSH_HAEIN	ATP-dependent zinc metalloprotease FtsH	PF00004: ATPase family associated with various cellular activities (AAA)	IPR003593: AAA+ ATPase domain; IPR003959: ATPase, AAA-type, core; IPR003960: ATPase, AAA-type, conserved site; IPR027417: P-loop containing nucleoside triphosphate hydrolase	GO:0005524 MF: ATP binding	G	PF00004	IPR003593; IPR003959; IPR003960; IPR027417	GO:0005524
TraesCS3B02G178200.2	0	*-*	sp|P71377|FTSH_HAEIN	ATP-dependent zinc metalloprotease FtsH	PF00004: ATPase family associated with various cellular activities (AAA)	IPR003593: AAA+ ATPase domain; IPR003959: ATPase, AAA-type, core; IPR003960: ATPase, AAA-type, conserved site; IPR027417: P-loop containing nucleoside triphosphate hydrolase	GO:0005524 MF: ATP binding	G	PF00004	IPR003593; IPR003959; IPR003960; IPR027417	GO:0005524
TraesCS3B02G178200.1	1	*-*	sp|P73179|FTSH1_SYNY3	ATP-dependent zinc metalloprotease FtsH 1	PF00004: ATPase family associated with various cellular activities (AAA)	IPR003593: AAA+ ATPase domain; IPR003959: ATPase, AAA-type, core; IPR003960: ATPase, AAA-type, conserved site; IPR027417: P-loop containing nucleoside triphosphate hydrolase	GO:0005524 MF: ATP binding	G	PF00004	IPR003593; IPR003959; IPR003960; IPR027417	GO:0005524
TraesCS1A02G003300.1	1	*-*	tr|Q6Q625|Q6Q625_WHEAT	Protein ROOT HAIR DEFECTIVE 3 homolog	PF05879: Root hair defective 3 GTP-binding protein (RHD3)	IPR008803: RHD3/Sey1		G	PF05879	IPR008803
TraesCS3B02G572600.1	1	--*	AT5G67040.1	F-box protein, putative (DUF295)	PF03478: Protein of unknown function (DUF295)	IPR005174: Domain unknown function DUF295		TE?	PF03478	IPR005174
TraesCS7D02G348100.3	0	*-*	tr|B2ZGR6|B2ZGR6_SOYBN	NAC domain protein	PF02365: No apical meristem (NAM) protein	IPR003441: NAC domain	GO:0003677 MF: DNA binding;GO:0006355 BP: regulation of transcription, DNA-templated	G	PF02365	IPR003441	GO:0003677; GO:0006355
TraesCS7D02G348100.2	0	*-*	tr|S5R649|S5R649_9ROSA	NAC domain protein	PF02365: No apical meristem (NAM) protein	IPR003441: NAC domain	GO:0003677 MF: DNA binding;GO:0006355 BP: regulation of transcription, DNA-templated	G	PF02365	IPR003441	GO:0003677; GO:0006355
TraesCS7D02G348100.1	1	*-*	tr|S5R649|S5R649_9ROSA	NAC domain protein	PF02365: No apical meristem (NAM) protein	IPR003441: NAC domain	GO:0003677 MF: DNA binding;GO:0006355 BP: regulation of transcription, DNA-templated	G	PF02365	IPR003441	GO:0003677; GO:0006355
TraesCS2D02G334800.1	1	*-*	tr|I6XSG2|I6XSG2_9CARY	NAC domain protein	PF02365: No apical meristem (NAM) protein	IPR003441: NAC domain	GO:0003677 MF: DNA binding;GO:0006355 BP: regulation of transcription, DNA-templated	G	PF02365	IPR003441	GO:0003677; GO:0006355
TraesCS4A02G147800.1	1	***	tr|B6U4H8|B6U4H8_MAIZE	Polypyrimidine tract-binding protein	PF00076: RNA recognition motif. (a.k.a. RRM, RBD, or RNP domain); PF13893: RNA recognition motif. (a.k.a. RRM, RBD, or RNP domain)	IPR000504: RNA recognition motif domain	GO:0003676 MF: nucleic acid binding	G	PF00076; PF13893	IPR000504	GO:0003676
TraesCS4A02G246500.1	1	***	tr|A0A0A1I5C1|A0A0A1I5C1_9POAL	Kinase PfkB	PF00294: pfkB family carbohydrate kinase	IPR002173: Carbohydrate/puine kinase, PfkB, conserved site; IPR011611: Carbohydrate kinase PfkB; IPR029056: Ribokinase-like	GO:0016773 MF: phosphotransferase activity, alcohol group as acceptor	G	PF00294	IPR002173; IPR011611; IPR029056	GO:0016773
TraesCS4D02G239700.1	1	***	tr|D2KLI5|D2KLI5_MAIZE	Trehalose-6-phosphate synthase	PF00982: Glycosyltransferase family 20; PF02358: Trehalose-phosphatase	IPR001830: Glycosyl transferase, family 20; IPR003337: Trehalose-phosphatase; IPR006379: HAD-superfamily hydrolase, subfamily IIB; IPR023214: HAD-like domain	GO:0003824 MF: catalytic activity;GO:0005992 BP: trehalose biosynthetic process	G	PF00982; PF02358	IPR001830; IPR003337; IPR006379; IPR023214	GO:0003824; GO:0005992
TraesCS5B02G374100.1	1	***	tr|A0A1D1YV02|A0A1D1YV02_9ARAE	Histidine--tRNA ligase	PF13393: Histidyl-tRNA synthetase; PF03129: Anticodon binding domain	IPR004154: Anticodon-binding; IPR004516: Histidine-tRNA ligase/ATP phosphoribosyltransferase regulatory subunit; IPR006195: Aminoacyl-tRNA synthetase, class II; IPR015807: Histidine-tRNA ligase	GO:0004821 MF: histidine-tRNA ligase activity;GO:0005524 MF: ATP binding;GO:0005737 CC: cytoplasm;GO:0006427 BP: histidyl-tRNA aminoacylation	G	PF13393; PF03129	IPR004154; IPR004516; IPR006195; IPR015807	GO:0004821; GO:0005524; GO:0005737; GO:0006427
TraesCS3D02G199900.1	1	***	tr|B9SLZ3|B9SLZ3_RICCO	Mitochondrial carrier protein, putative	PF00153: Mitochondrial carrier protein	IPR002067: Mitochondrial carrier protein; IPR018108: Mitochondrial substrate/solute carrier; IPR023395: Mitochondrial carrier domain	GO:0055085 BP: transmembrane transport	G	PF00153	IPR002067; IPR018108; IPR023395	GO:0055085
TraesCS2D02G416700.1	1	--*	tr|A0A1J3IBK8|A0A1J3IBK8_NOCCA	Topless-related protein 2				G
TraesCS1A02G411100.1	1	*-*	AT5G07580.1	ethylene-responsive transcription factor	PF00847: AP2 domain	IPR001471: AP2/ERF domain; IPR016177: DNA-binding domain	GO:0003677 MF: DNA binding;GO:0003700 MF: transcription factor activity, sequence-specific DNA binding;GO:0006355 BP: regulation of transcription, DNA-templated	G	PF00847	IPR001471; IPR016177	GO:0003677; GO:0003700; GO:0006355
TraesCS2A02G375000.1	0	***	tr|A0A072VNC3|A0A072VNC3_MEDTR	Endosomal targeting BRO1-like domain protein	PF03097: BRO1-like domain	IPR004328: BRO1 domain		G	PF03097	IPR004328
TraesCS2A02G375000.2	1	***	tr|A0A072VNC3|A0A072VNC3_MEDTR	Endosomal targeting BRO1-like domain protein	PF03097: BRO1-like domain	IPR004328: BRO1 domain		G	PF03097	IPR004328
TraesCS3B02G227300.1	1	***	tr|G7JB45|G7JB45_MEDTR	Transmembrane protein, putative				G
TraesCS5A02G189000.1	1	***	tr|M7ZTR3|M7ZTR3_TRIUA	MND1-interacting protein 1	PF13920: Zinc finger, C3HC4 type (RING finger)	IPR001841: Zinc finger, RING-type; IPR013083: Zinc finger, RING/FYVE/PHD-type	GO:0005515 MF: protein binding;GO:0008270 MF: zinc ion binding	G	PF13920	IPR001841; IPR013083	GO:0005515; GO:0008270
TraesCS5D02G501700.2	1	***	tr|A0A199VRC0|A0A199VRC0_ANACO	Protein DEFECTIVE IN EXINE FORMATION 1	PF13517: Repeat domain in Vibrio, Colwellia, Bradyrhizobium and Shewanella			G	PF13517
TraesCS3A02G311800.1	1	***	tr|G7LFZ0|G7LFZ0_MEDTR	Avr9/Cf-9 rapidly elicited protein	PF05553: Cotton fibre expressed protein	IPR008480: Protein of unknown function DUF761, plant		G	PF05553	IPR008480
TraesCS5D02G501700.1	0	***	tr|A0A199VRC0|A0A199VRC0_ANACO	Protein DEFECTIVE IN EXINE FORMATION 1	PF13517: Repeat domain in Vibrio, Colwellia, Bradyrhizobium and Shewanella			G	PF13517
TraesCS2D02G303400.2	0	***	tr|A0A072VPK0|A0A072VPK0_MEDTR	DUF668 family protein	PF11961: Domain of unknown function (DUF3475); PF05003: Protein of unknown function (DUF668)	IPR007700: Protein of unknown function DUF668; IPR021864: Protein of unknown function DUF3475		G	PF11961; PF05003	IPR007700; IPR021864
TraesCS2D02G303400.3	0	***	tr|A0A072VPK0|A0A072VPK0_MEDTR	DUF668 family protein	PF11961: Domain of unknown function (DUF3475); PF05003: Protein of unknown function (DUF668)	IPR007700: Protein of unknown function DUF668; IPR021864: Protein of unknown function DUF3475		G	PF11961; PF05003	IPR007700; IPR021864
TraesCS2D02G303400.1	1	***	tr|A0A072VPK0|A0A072VPK0_MEDTR	DUF668 family protein	PF11961: Domain of unknown function (DUF3475); PF05003: Protein of unknown function (DUF668)	IPR007700: Protein of unknown function DUF668; IPR021864: Protein of unknown function DUF3475		G	PF11961; PF05003	IPR007700; IPR021864
TraesCS3D02G346000.1	1	***	tr|G7I9N4|G7I9N4_MEDTR	Ureidoglycolate hydrolase, putative		IPR011051: RmlC-like cupin domain; IPR024060: Ureidoglycolate lyase domain	GO:0004848 MF: ureidoglycolate hydrolase activity	G		IPR011051; IPR024060	GO:0004848
TraesCS2D02G415000.1	1	***	tr|K7VQC2|K7VQC2_MAIZE	Histone H4	PF15511: Centromere kinetochore component CENP-T histone fold	IPR001951: Histone H4; IPR009072: Histone-fold	GO:0000786 CC: nucleosome;GO:0003677 MF: DNA binding;GO:0005634 CC: nucleus;GO:0046982 MF: protein heterodimerization activity	G	PF15511	IPR001951; IPR009072	GO:0000786; GO:0003677; GO:0005634; GO:0046982
TraesCS1A02G273900.1	1	***	sp|B3QWF5|F16PA_CHLT3	Fructose-1,6-bisphosphatase class 1	PF00316: Fructose-1-6-bisphosphatase, N-terminal domain	IPR000146: Fructose-1,6-bisphosphatase class 1; IPR020548: Fructose-1,6-bisphosphatase, active site; IPR028343: Fructose-1,6-bisphosphatase; IPR033391: Fructose-1-6-bisphosphatase class I, N-terminal	GO:0005975 BP: carbohydrate metabolic process;GO:0016791 MF: phosphatase activity;GO:0042132 MF: fructose 1,6-bisphosphate 1-phosphatase activity;GO:0042578 MF: phosphoric ester hydrolase activity	G	PF00316	IPR000146; IPR020548; IPR028343; IPR033391	GO:0005975; GO:0016791; GO:0042132; GO:0042578
TraesCS3B02G123100.1	1	***	AT1G17620.1	Late embryogenesis abundant (LEA) hydroxyproline-rich glycoprotein family		IPR013783: Immunoglobulin-like fold		G		IPR013783
TraesCS3D02G374900.1	1	***	tr|A0A1E5WKJ7|A0A1E5WKJ7_9POAL	Embryogenesis-associated protein EMB8	PF00561: alpha/beta hydrolase fold	IPR000073: Alpha/beta hydrolase fold-1; IPR029058: Alpha/Beta hydrolase fold		G	PF00561	IPR000073; IPR029058
TraesCS3D02G374900.2	0	***	tr|A0A1E5WKJ7|A0A1E5WKJ7_9POAL	Embryogenesis-associated protein EMB8	PF00561: alpha/beta hydrolase fold	IPR000073: Alpha/beta hydrolase fold-1; IPR029058: Alpha/Beta hydrolase fold		G	PF00561	IPR000073; IPR029058
TraesCS4A02G247600.1	1	*-*	tr|A0A061F8S8|A0A061F8S8_THECC	ATP synthase delta-subunit protein	PF00213: ATP synthase delta (OSCP) subunit	IPR000711: ATPase, OSCP/delta subunit	GO:0015986 BP: ATP synthesis coupled proton transport;GO:0046933 MF: proton-transporting ATP synthase activity, rotational mechanism	G	PF00213	IPR000711	GO:0015986; GO:0046933
TraesCS5A02G278200.1	1	***	tr|A0A1D5YQX6|A0A1D5YQX6_WHEAT	DNA topoisomerase	PF01751: Toprim domain; PF01131: DNA topoisomerase	IPR003601: DNA topoisomerase, type IA, domain 2; IPR003602: DNA topoisomerase, type IA, DNA-binding domain; IPR006171: TOPRIM domain; IPR013497: DNA topoisomerase, type IA, central; IPR013825: DNA topoisomerase, type IA, central region, subdomain 2; IPR023405: DNA topoisomerase, type IA, core domain	GO:0003677 MF: DNA binding;GO:0003916 MF: DNA topoisomerase activity;GO:0006265 BP: DNA topological change	G	PF01751; PF01131	IPR003601; IPR003602; IPR006171; IPR013497; IPR013825; IPR023405	GO:0003677; GO:0003916; GO:0006265
TraesCS4D02G214700.1	1	***	sp|P9WMY9|GLGSY_MYCTU	Glycogen synthase	PF13439: Glycosyltransferase Family 4; PF00534: Glycosyl transferases group 1	IPR001296: Glycosyl transferase, family 1; IPR028098: Glycosyltransferase subfamily 4-like, N-terminal domain		G	PF13439; PF00534	IPR001296; IPR028098
TraesCS3D02G448500.1	1	--*	AT3G44090.1	F-box family protein	PF08387: FBD	IPR001810: F-box domain; IPR006566: FBD domain; IPR032675: Leucine-rich repeat domain, L domain-like	GO:0005515 MF: protein binding	TE?	PF08387	IPR001810; IPR006566; IPR032675	GO:0005515
TraesCS3A02G333000.2	1	*-*	tr|G7L5U5|G7L5U5_MEDTR	Cyclin	PF00134: Cyclin, N-terminal domain; PF02984: Cyclin, C-terminal domain	IPR004367: Cyclin, C-terminal domain; IPR006671: Cyclin, N-terminal; IPR013763: Cyclin-like	GO:0005634 CC: nucleus	G	PF00134; PF02984	IPR004367; IPR006671; IPR013763	GO:0005634
TraesCS3A02G333000.1	0	*-*	tr|G7L5U5|G7L5U5_MEDTR	Cyclin	PF00134: Cyclin, N-terminal domain; PF02984: Cyclin, C-terminal domain	IPR004367: Cyclin, C-terminal domain; IPR006671: Cyclin, N-terminal; IPR013763: Cyclin-like	GO:0005634 CC: nucleus	G	PF00134; PF02984	IPR004367; IPR006671; IPR013763	GO:0005634
TraesCS6A02G273700.1	1	***	tr|B6U0J8|B6U0J8_MAIZE	Zinc finger homeodomain protein 1	PF04770: ZF-HD protein dimerisation region	IPR006455: Homeodomain, ZF-HD class; IPR006456: ZF-HD homeobox protein, Cys/His-rich dimerisation domain; IPR009057: Homeobox domain-like	GO:0003677 MF: DNA binding	G	PF04770	IPR006455; IPR006456; IPR009057	GO:0003677
TraesCS3D02G193300.1	1	*-*	tr|D9ZCE7|D9ZCE7_9CARY	Glycosyl hydrolase				G
TraesCS4A02G387900.1	1	***	tr|B9H3J6|B9H3J6_POPTR	Pre-mRNA splicing factor PRP38 family protein	PF03371: PRP38 family; PF12871: Pre-mRNA-splicing factor 38-associated hydrophilic C-term	IPR005037: Pre-mRNA-splicing factor 38; IPR024767: Pre-mRNA-splicing factor 38, C-terminal		G	PF03371; PF12871	IPR005037; IPR024767
TraesCS1D02G152400.1	1	***	tr|A0A199UKN6|A0A199UKN6_ANACO	Pentatricopeptide repeat-containing protein	PF01535: PPR repeat; PF13041: PPR repeat family	IPR002885: Pentatricopeptide repeat		G	PF01535; PF13041	IPR002885
TraesCS1A02G398500.1	1	*-*	AT1G10110.1	F-box family protein		IPR001810: F-box domain	GO:0005515 MF: protein binding	TE?		IPR001810	GO:0005515
TraesCS4A02G407200.1	1	***	tr|Q10QM8|Q10QM8_ORYSJ	Mitochondrial carrier protein, expressed	PF00153: Mitochondrial carrier protein	IPR002067: Mitochondrial carrier protein; IPR018108: Mitochondrial substrate/solute carrier; IPR023395: Mitochondrial carrier domain	GO:0055085 BP: transmembrane transport	G	PF00153	IPR002067; IPR018108; IPR023395	GO:0055085
TraesCS3B02G577400.1	1	***	tr|A0A1J3J4J0|A0A1J3J4J0_NOCCA	Protein TolB	PF07676: WD40-like Beta Propeller Repeat	IPR011659: WD40-like Beta Propeller		G	PF07676	IPR011659
TraesCS5B02G342300.1	1	--*	AT1G49990.1	F-box family protein	PF00646: F-box domain	IPR001810: F-box domain	GO:0005515 MF: protein binding	TE?	PF00646	IPR001810	GO:0005515
TraesCS1B02G320800.1	1	***	tr|N1R4U9|N1R4U9_AEGTA	Tubulin beta chain	PF00091: Tubulin/FtsZ family, GTPase domain; PF03953: Tubulin C-terminal domain	IPR000217: Tubulin; IPR002453: Beta tubulin; IPR003008: Tubulin/FtsZ, GTPase domain; IPR008280: Tubulin/FtsZ, C-terminal; IPR013838: Beta tubulin, autoregulation binding site; IPR017975: Tubulin, conserved site; IPR018316: Tubulin/FtsZ, 2-layer sandwich domain	GO:0003924 MF: GTPase activity;GO:0005200 MF: structural constituent of cytoskeleton;GO:0005525 MF: GTP binding;GO:0005874 CC: microtubule;GO:0007017 BP: microtubule-based process	G	PF00091; PF03953	IPR000217; IPR002453; IPR003008; IPR008280; IPR013838; IPR017975; IPR018316	GO:0003924; GO:0005200; GO:0005525; GO:0005874; GO:0007017
TraesCS3B02G273900.3	0	***	tr|A0A072UNU6|A0A072UNU6_MEDTR	Homeodomain transcriptional regulator	PF02791: DDT domain; PF05066: HB1, ASXL, restriction endonuclease HTH domain; PF15612: WSTF, HB1, Itc1p, MBD9 motif 1; PF15613: Williams-Beuren syndrome DDT (WSD), D-TOX E motif	IPR007759: HB1/Asxl, restriction endonuclease HTH domain; IPR018501: DDT domain; IPR028941: WHIM2 domain; IPR028942: WHIM1 domain	GO:0006351 BP: transcription, DNA-templated;GO:0006355 BP: regulation of transcription, DNA-templated	G	PF02791; PF05066; PF15612; PF15613	IPR007759; IPR018501; IPR028941; IPR028942	GO:0006351; GO:0006355
TraesCS4B02G233600.1	1	*-*	tr|G7KPX0|G7KPX0_MEDTR	Receptor-like kinase	PF07714: Protein tyrosine kinase	IPR000719: Protein kinase domain; IPR001245: Serine-threonine/tyrosine-protein kinase, catalytic domain; IPR008271: Serine/threonine-protein kinase, active site; IPR011009: Protein kinase-like domain; IPR017441: Protein kinase, ATP binding site	GO:0004672 MF: protein kinase activity;GO:0005524 MF: ATP binding;GO:0006468 BP: protein phosphorylation	G	PF07714	IPR000719; IPR001245; IPR008271; IPR011009; IPR017441	GO:0004672; GO:0005524; GO:0006468
TraesCS7D02G245200.2	1	***	tr|A0A097DCU0|A0A097DCU0_9ROSA	Squamosa promoter binding protein	PF03110: SBP domain	IPR004333: Transcription factor, SBP-box	GO:0003677 MF: DNA binding;GO:0005634 CC: nucleus	G	PF03110	IPR004333	GO:0003677; GO:0005634
TraesCS1B02G308800.1	1	***	tr|M8BYY5|M8BYY5_AEGTA	B3 domain-containing protein	PF02362: B3 DNA binding domain	IPR003340: B3 DNA binding domain; IPR015300: DNA-binding pseudobarrel domain	GO:0003677 MF: DNA binding	G	PF02362	IPR003340; IPR015300	GO:0003677
TraesCS6A02G069200.2	0	*-*	tr|A0A1J3G2K0|A0A1J3G2K0_NOCCA	Glutathione S-transferase T3	PF14303: No apical meristem-associated C-terminal domain	IPR029466: No apical meristem-associated, C-terminal domain		G	PF14303	IPR029466
TraesCS6A02G069200.3	0	--*	tr|B1Q3A7|B1Q3A7_BRACM	Cysteine protease	PF08246: Cathepsin propeptide inhibitor domain (I29)	IPR013201: Cathepsin propeptide inhibitor domain (I29)		G	PF08246	IPR013201
TraesCS6A02G069200.1	1	*-*	tr|A0A1J3G2K0|A0A1J3G2K0_NOCCA	Glutathione S-transferase T3	PF14303: No apical meristem-associated C-terminal domain	IPR029466: No apical meristem-associated, C-terminal domain		G	PF14303	IPR029466
TraesCS7D02G472400.1	1	***	tr|A0A1D6CT49|A0A1D6CT49_WHEAT	Actin-related protein 2/3 complex subunit 3	PF04062: ARP2/3 complex ARPC3 (21 kDa) subunit	IPR007204: Actin-related protein 2/3 complex subunit 3	GO:0005856 CC: cytoskeleton;GO:0005885 CC: Arp2/3 protein complex;GO:0030833 BP: regulation of actin filament polymerization;GO:0034314 BP: Arp2/3 complex-mediated actin nucleation	G	PF04062	IPR007204	GO:0005856; GO:0005885; GO:0030833; GO:0034314
TraesCS6A02G311300.1	1	***	tr|M8ASB4|M8ASB4_AEGTA	GDSL esterase/lipase	PF00657: GDSL-like Lipase/Acylhydrolase	IPR001087: GDSL lipase/esterase; IPR013830: SGNH hydrolase-type esterase domain	GO:0016788 MF: hydrolase activity, acting on ester bonds	G	PF00657	IPR001087; IPR013830	GO:0016788
TraesCS6D02G187600.1	1	***	tr|A0A0K9PWE8|A0A0K9PWE8_ZOSMR	RING finger family protein	PF13639: Ring finger domain	IPR001841: Zinc finger, RING-type; IPR011016: Zinc finger, RING-CH-type; IPR013083: Zinc finger, RING/FYVE/PHD-type	GO:0005515 MF: protein binding;GO:0008270 MF: zinc ion binding	G	PF13639	IPR001841; IPR011016; IPR013083	GO:0005515; GO:0008270
TraesCS1B02G081900.1	1	***	tr|A0A1D5SJR4|A0A1D5SJR4_WHEAT	Glycosyltransferases	PF03360: Glycosyltransferase family 43	IPR005027: Glycosyl transferase, family 43; IPR029044: Nucleotide-diphospho-sugar transferases	GO:0015018 MF: galactosylgalactosylxylosylprotein 3-beta-glucuronosyltransferase activity;GO:0016020 CC: membrane	G	PF03360	IPR005027; IPR029044	GO:0015018; GO:0016020
TraesCS6B02G141700.1	1	--*	sp|Q084C2|NADE_SHEFN	NH(3)-dependent NAD(+) synthetase				G
TraesCS7D02G551600.1	1	***	tr|A0A1D6CSV5|A0A1D6CSV5_WHEAT	4-hydroxy-4-methyl-2-oxoglutarate aldolase	PF03737: Demethylmenaquinone methyltransferase	IPR005493: Ribonuclease E inhibitor RraA/RraA-like protein; IPR010203: Regulator of ribonuclease activity A	GO:0008428 MF: ribonuclease inhibitor activity;GO:0051252 BP: regulation of RNA metabolic process	G	PF03737	IPR005493; IPR010203	GO:0008428; GO:0051252
TraesCS2B02G264700.1	1	--*	sp|A7GIK1|GATB_CLOBL	Aspartyl/glutamyl-tRNA(Asn/Gln) amidotransferase subunit B				G
TraesCS1D02G258800.1	1	***	tr|W5AET6|W5AET6_WHEAT	Tubulin beta chain	PF00091: Tubulin/FtsZ family, GTPase domain; PF03953: Tubulin C-terminal domain	IPR000217: Tubulin; IPR002453: Beta tubulin; IPR003008: Tubulin/FtsZ, GTPase domain; IPR008280: Tubulin/FtsZ, C-terminal; IPR013838: Beta tubulin, autoregulation binding site; IPR017975: Tubulin, conserved site; IPR018316: Tubulin/FtsZ, 2-layer sandwich domain	GO:0003924 MF: GTPase activity;GO:0005200 MF: structural constituent of cytoskeleton;GO:0005525 MF: GTP binding;GO:0005874 CC: microtubule;GO:0007017 BP: microtubule-based process	G	PF00091; PF03953	IPR000217; IPR002453; IPR003008; IPR008280; IPR013838; IPR017975; IPR018316	GO:0003924; GO:0005200; GO:0005525; GO:0005874; GO:0007017
TraesCS3D02G180400.1	1	*-*	tr|Q6ATJ5|Q6ATJ5_ORYSJ	FHA domain containing protein, expressed	PF00498: FHA domain	IPR000253: Forkhead-associated (FHA) domain; IPR008984: SMAD/FHA domain	GO:0005515 MF: protein binding	G	PF00498	IPR000253; IPR008984	GO:0005515
TraesCS6B02G373200.2	0	--*	tr|F4JFS2|F4JFS2_ARATH	GPI-anchored adhesin-like protein				G
TraesCS2A02G471600.1	1	***	tr|B6TUT8|B6TUT8_MAIZE	Phospholipase A2		IPR016090: Phospholipase A2 domain; IPR033113: Phospholipase A2, histidine active site	GO:0004623 MF: phospholipase A2 activity;GO:0006644 BP: phospholipid metabolic process;GO:0050482 BP: arachidonic acid secretion	G		IPR016090; IPR033113	GO:0004623; GO:0006644; GO:0050482
TraesCS6B02G349400.1	1	***	tr|A0A1D6AS49|A0A1D6AS49_WHEAT	DIS3-like exonuclease 2	PF00773: RNB domain	IPR012340: Nucleic acid-binding, OB-fold; IPR022966: Ribonuclease II/R, conserved site; IPR028591: DIS3-like exonuclease 2	GO:0000175 MF: 3'-5'-exoribonuclease activity;GO:0034427 BP: nuclear-transcribed mRNA catabolic process, exonucleolytic, 3'-5'	G	PF00773	IPR012340; IPR022966; IPR028591	GO:0000175; GO:0034427
TraesCS1A02G193500.1	1	***	tr|O24141|O24141_TOBAC	Plastid-lipid-Associated Protein	PF04755: PAP_fibrillin	IPR006843: Plastid lipid-associated protein/fibrillin conserved domain		G	PF04755	IPR006843
TraesCS4D02G202200.3	0	***	tr|A0A103XD00|A0A103XD00_CYNCS	Calcium-transporting ATPase	PF00122: E1-E2 ATPase; PF13246: Cation transport ATPase (P-type); PF08282: haloacid dehalogenase-like hydrolase; PF00689: Cation transporting ATPase, C-terminus	IPR001757: P-type ATPase; IPR006068: Cation-transporting P-type ATPase, C-terminal; IPR008250: P-type ATPase, A domain; IPR018303: P-type ATPase, phosphorylation site; IPR023214: HAD-like domain; IPR023298: P-type ATPase, transmembrane domain; IPR023299: P-type ATPase, cytoplasmic domain N	GO:0000166 MF: nucleotide binding;GO:0016021 CC: integral component of membrane;GO:0046872 MF: metal ion binding	G	PF00122; PF13246; PF08282; PF00689	IPR001757; IPR006068; IPR008250; IPR018303; IPR023214; IPR023298; IPR023299	GO:0000166; GO:0016021; GO:0046872
TraesCS5D02G198600.1	1	***	tr|G7LHH5|G7LHH5_MEDTR	Metallo-hydrolase/oxidoreductase superfamily protein	PF12706: Beta-lactamase superfamily domain	IPR001279: Metallo-beta-lactamase		G	PF12706	IPR001279
TraesCS5D02G198600.2	0	***	tr|G7LHH5|G7LHH5_MEDTR	Metallo-hydrolase/oxidoreductase superfamily protein	PF12706: Beta-lactamase superfamily domain	IPR001279: Metallo-beta-lactamase		G	PF12706	IPR001279
TraesCS1B02G457200.1	1	--*	AT2G21510.5	DNAJ heat shock N-terminal domain-containing protein				G
TraesCS6A02G018300.1	1	***	tr|Q67UH1|Q67UH1_ORYSJ	Mitochondrial transcription termination factor-like	PF02536: mTERF	IPR003690: Transcription termination factor, mitochondrial/chloroplastic	GO:0003690 MF: double-stranded DNA binding;GO:0006355 BP: regulation of transcription, DNA-templated	G	PF02536	IPR003690	GO:0003690; GO:0006355
TraesCS2A02G512900.1	1	--*	AT3G24850.1	B3 domain protein (DUF313)		IPR015300: DNA-binding pseudobarrel domain		G		IPR015300
TraesCS1B02G466400.1	1	***	tr|A0A072TGX0|A0A072TGX0_MEDTR	Disease resistance protein	PF00931: NB-ARC domain	IPR001611: Leucine-rich repeat; IPR002182: NB-ARC; IPR011991: Winged helix-turn-helix DNA-binding domain; IPR027417: P-loop containing nucleoside triphosphate hydrolase; IPR032675: Leucine-rich repeat domain, L domain-like	GO:0005515 MF: protein binding;GO:0043531 MF: ADP binding	G	PF00931	IPR001611; IPR002182; IPR011991; IPR027417; IPR032675	GO:0005515; GO:0043531
TraesCS2D02G301500.1	1	***	tr|D7L9X7|D7L9X7_ARALL	Kinase family protein	PF00069: Protein kinase domain	IPR000719: Protein kinase domain; IPR008271: Serine/threonine-protein kinase, active site; IPR011009: Protein kinase-like domain	GO:0004672 MF: protein kinase activity;GO:0005524 MF: ATP binding;GO:0006468 BP: protein phosphorylation	G	PF00069	IPR000719; IPR008271; IPR011009	GO:0004672; GO:0005524; GO:0006468
TraesCS2D02G301500.3	0	***	tr|D7L9X7|D7L9X7_ARALL	Kinase family protein	PF00069: Protein kinase domain	IPR000719: Protein kinase domain; IPR008271: Serine/threonine-protein kinase, active site; IPR011009: Protein kinase-like domain	GO:0004672 MF: protein kinase activity;GO:0005524 MF: ATP binding;GO:0006468 BP: protein phosphorylation	G	PF00069	IPR000719; IPR008271; IPR011009	GO:0004672; GO:0005524; GO:0006468
TraesCS2D02G301500.2	0	***	tr|D7L9X7|D7L9X7_ARALL	Kinase family protein	PF00069: Protein kinase domain	IPR000719: Protein kinase domain; IPR008271: Serine/threonine-protein kinase, active site; IPR011009: Protein kinase-like domain	GO:0004672 MF: protein kinase activity;GO:0005524 MF: ATP binding;GO:0006468 BP: protein phosphorylation	G	PF00069	IPR000719; IPR008271; IPR011009	GO:0004672; GO:0005524; GO:0006468
TraesCS4B02G249200.1	1	***	AT5G07910.1	Leucine-rich repeat (LRR) family protein	PF13855: Leucine rich repeat	IPR001611: Leucine-rich repeat; IPR003591: Leucine-rich repeat, typical subtype; IPR032675: Leucine-rich repeat domain, L domain-like	GO:0005515 MF: protein binding	G	PF13855	IPR001611; IPR003591; IPR032675	GO:0005515
TraesCS2D02G301500.4	0	***	tr|D7L9X7|D7L9X7_ARALL	Kinase family protein	PF00069: Protein kinase domain	IPR000719: Protein kinase domain; IPR008271: Serine/threonine-protein kinase, active site; IPR011009: Protein kinase-like domain	GO:0004672 MF: protein kinase activity;GO:0005524 MF: ATP binding;GO:0006468 BP: protein phosphorylation	G	PF00069	IPR000719; IPR008271; IPR011009	GO:0004672; GO:0005524; GO:0006468
TraesCS4B02G249200.2	0	***	AT5G07910.1	Leucine-rich repeat (LRR) family protein		IPR001611: Leucine-rich repeat; IPR003591: Leucine-rich repeat, typical subtype; IPR032675: Leucine-rich repeat domain, L domain-like	GO:0005515 MF: protein binding	G		IPR001611; IPR003591; IPR032675	GO:0005515
TraesCS2B02G363500.1	1	-**	tr|W9RW78|W9RW78_9ROSA	F-box protein				TE?
TraesCS4D02G149800.1	1	***	tr|A0A1D5X3A9|A0A1D5X3A9_WHEAT	Eukaryotic translation initiation factor 3 subunit I	PF00400: WD domain, G-beta repeat	IPR001680: WD40 repeat; IPR015943: WD40/YVTN repeat-like-containing domain; IPR017986: WD40-repeat-containing domain; IPR019775: WD40 repeat, conserved site; IPR020472: G-protein beta WD-40 repeat; IPR027525: Eukaryotic translation initiation factor 3 subunit I	GO:0003743 MF: translation initiation factor activity;GO:0005515 MF: protein binding;GO:0005737 CC: cytoplasm;GO:0005852 CC: eukaryotic translation initiation factor 3 complex	G	PF00400	IPR001680; IPR015943; IPR017986; IPR019775; IPR020472; IPR027525	GO:0003743; GO:0005515; GO:0005737; GO:0005852
TraesCS4D02G149800.2	0	***	tr|A0A1D5XHQ4|A0A1D5XHQ4_WHEAT	Eukaryotic translation initiation factor 3 subunit I	PF00400: WD domain, G-beta repeat	IPR001680: WD40 repeat; IPR015943: WD40/YVTN repeat-like-containing domain; IPR017986: WD40-repeat-containing domain; IPR019775: WD40 repeat, conserved site; IPR020472: G-protein beta WD-40 repeat; IPR027525: Eukaryotic translation initiation factor 3 subunit I	GO:0003743 MF: translation initiation factor activity;GO:0005515 MF: protein binding;GO:0005737 CC: cytoplasm;GO:0005852 CC: eukaryotic translation initiation factor 3 complex	G	PF00400	IPR001680; IPR015943; IPR017986; IPR019775; IPR020472; IPR027525	GO:0003743; GO:0005515; GO:0005737; GO:0005852
TraesCS2A02G022400.1	1	**-	tr|M7YJ58|M7YJ58_TRIUA	Myrcene synthase, chloroplastic	PF01397: Terpene synthase, N-terminal domain; PF03936: Terpene synthase family, metal binding domain	IPR001906: Terpene synthase, N-terminal domain; IPR005630: Terpene synthase, metal-binding domain; IPR008930: Terpenoid cyclases/protein prenyltransferase alpha-alpha toroid; IPR008949: Isoprenoid synthase domain	GO:0000287 MF: magnesium ion binding;GO:0008152 BP: metabolic process;GO:0010333 MF: terpene synthase activity;GO:0016829 MF: lyase activity	G	PF01397; PF03936	IPR001906; IPR005630; IPR008930; IPR008949	GO:0000287; GO:0008152; GO:0010333; GO:0016829
TraesCS5B02G384600.1	1	***	tr|C0PD69|C0PD69_MAIZE	WRKY transcription factor	PF10533: Plant zinc cluster domain; PF03106: WRKY DNA -binding domain	IPR003657: WRKY domain; IPR018872: Zn-cluster domain	GO:0003700 MF: transcription factor activity, sequence-specific DNA binding;GO:0006355 BP: regulation of transcription, DNA-templated;GO:0043565 MF: sequence-specific DNA binding	G	PF10533; PF03106	IPR003657; IPR018872	GO:0003700; GO:0006355; GO:0043565
TraesCS3B02G299800.1	1	***	tr|B9RII5|B9RII5_RICCO	Glutamate synthase, putative	PF00310: Glutamine amidotransferases class-II; PF04898: Glutamate synthase central domain; PF01645: Conserved region in glutamate synthase; PF01493: GXGXG motif; PF14691: Dihydroprymidine dehydrogenase domain II, 4Fe-4S cluster; PF07992: Pyridine nucleotide-disulphide oxidoreductase	IPR002489: Glutamate synthase, alpha subunit, C-terminal; IPR002932: Glutamate synthase domain; IPR006005: Glutamate synthase, NADH/NADPH, small subunit 1; IPR006982: Glutamate synthase, central-N; IPR009051: Alpha-helical ferredoxin; IPR012220: Glutamate synthase, eukaryotic; IPR013785: Aldolase-type TIM barrel; IPR017932: Glutamine amidotransferase type 2 domain; IPR023753: FAD/NAD(P)-binding d…	GO:0003824 MF: catalytic activity;GO:0005506 MF: iron ion binding;GO:0006537 BP: glutamate biosynthetic process;GO:0006807 BP: nitrogen compound metabolic process;GO:0008152 BP: metabolic process;GO:0010181 MF: FMN binding;GO:0015930 MF: glutamate synthase activity;GO:0016040 MF: glutamate synthase (NADH) activity;GO:0016491 MF: oxidoreductase activity;GO:0016638 MF: oxidoreductase activity, acti…	G	PF00310; PF04898; PF01645; PF01493; PF14691; PF07992	IPR002489; IPR002932; IPR006005; IPR006982; IPR009051; IPR012220; IPR013785; IPR017932; IPR023753; IPR028261; IPR029055	GO:0003824; GO:0005506; GO:0006537; GO:0006807; GO:0008152; GO:0010181; GO:0015930; GO:0016040; GO:0016491; GO:0016638; GO:0016639; GO:0045181; GO:0050660; GO:0051536; GO:0055114
TraesCS7B02G399900.1	1	***	AT3G25490.1	Protein kinase family protein	PF07714: Protein tyrosine kinase	IPR000719: Protein kinase domain; IPR001245: Serine-threonine/tyrosine-protein kinase, catalytic domain; IPR001881: EGF-like calcium-binding domain; IPR008271: Serine/threonine-protein kinase, active site; IPR009030: Growth factor receptor cysteine-rich domain; IPR011009: Protein kinase-like domain	GO:0004672 MF: protein kinase activity;GO:0005509 MF: calcium ion binding;GO:0005524 MF: ATP binding;GO:0006468 BP: protein phosphorylation	G	PF07714	IPR000719; IPR001245; IPR001881; IPR008271; IPR009030; IPR011009	GO:0004672; GO:0005509; GO:0005524; GO:0006468
TraesCS3A02G074000.1	1	***	tr|A0A1D1ZBI0|A0A1D1ZBI0_9ARAE	Cleavage stimulation factor subunit 3	PF05843: Suppressor of forked protein (Suf)	IPR003107: HAT (Half-A-TPR) repeat; IPR008847: Suppressor of forked; IPR011990: Tetratricopeptide-like helical domain; IPR013026: Tetratricopeptide repeat-containing domain; IPR019734: Tetratricopeptide repeat	GO:0005515 MF: protein binding;GO:0005634 CC: nucleus;GO:0006396 BP: RNA processing;GO:0006397 BP: mRNA processing	G	PF05843	IPR003107; IPR008847; IPR011990; IPR013026; IPR019734	GO:0005515; GO:0005634; GO:0006396; GO:0006397
TraesCS4B02G200100.1	1	***	tr|A0A0U2I2F3|A0A0U2I2F3_HORVU	Glutathione-S-transferase	PF13417: Glutathione S-transferase, N-terminal domain; PF13410: Glutathione S-transferase, C-terminal domain	IPR004045: Glutathione S-transferase, N-terminal; IPR010987: Glutathione S-transferase, C-terminal-like; IPR012336: Thioredoxin-like fold	GO:0005515 MF: protein binding	G	PF13417; PF13410	IPR004045; IPR010987; IPR012336	GO:0005515
TraesCS6D02G344000.1	1	***	tr|I1IDH6|I1IDH6_BRADI	Plasma membrane ATPase	PF00690: Cation transporter/ATPase, N-terminus; PF00122: E1-E2 ATPase; PF00702: haloacid dehalogenase-like hydrolase	IPR001757: P-type ATPase; IPR004014: Cation-transporting P-type ATPase, N-terminal; IPR006534: P-type ATPase, subfamily IIIA; IPR008250: P-type ATPase, A domain; IPR018303: P-type ATPase, phosphorylation site; IPR023214: HAD-like domain; IPR023298: P-type ATPase, transmembrane domain; IPR023299: P-type ATPase, cytoplasmic domain N	GO:0000166 MF: nucleotide binding;GO:0006754 BP: ATP biosynthetic process;GO:0016021 CC: integral component of membrane;GO:0016887 MF: ATPase activity;GO:0046872 MF: metal ion binding	G	PF00690; PF00122; PF00702	IPR001757; IPR004014; IPR006534; IPR008250; IPR018303; IPR023214; IPR023298; IPR023299	GO:0000166; GO:0006754; GO:0016021; GO:0016887; GO:0046872
TraesCS1B02G463400.1	1	***	tr|A0A1D5SCR1|A0A1D5SCR1_WHEAT	Structural maintenance of chromosomes protein	PF02463: RecF/RecN/SMC N terminal domain; PF06470: SMC proteins Flexible Hinge Domain	IPR003395: RecF/RecN/SMC, N-terminal; IPR010935: SMCs flexible hinge; IPR024704: Structural maintenance of chromosomes protein; IPR027417: P-loop containing nucleoside triphosphate hydrolase	GO:0005515 MF: protein binding;GO:0005524 MF: ATP binding;GO:0005694 CC: chromosome;GO:0051276 BP: chromosome organization	G	PF02463; PF06470	IPR003395; IPR010935; IPR024704; IPR027417	GO:0005515; GO:0005524; GO:0005694; GO:0051276
TraesCS3B02G433600.1	1	***	tr|A0A0K9NR99|A0A0K9NR99_ZOSMR	Protein kinase family protein	PF12796: Ankyrin repeats (3 copies); PF07714: Protein tyrosine kinase	IPR000719: Protein kinase domain; IPR001245: Serine-threonine/tyrosine-protein kinase, catalytic domain; IPR002110: Ankyrin repeat; IPR008271: Serine/threonine-protein kinase, active site; IPR011009: Protein kinase-like domain; IPR020683: Ankyrin repeat-containing domain	GO:0004672 MF: protein kinase activity;GO:0005515 MF: protein binding;GO:0005524 MF: ATP binding;GO:0006468 BP: protein phosphorylation	G	PF12796; PF07714	IPR000719; IPR001245; IPR002110; IPR008271; IPR011009; IPR020683	GO:0004672; GO:0005515; GO:0005524; GO:0006468
TraesCS3B02G433600.2	0	***	tr|A0A0K9NR99|A0A0K9NR99_ZOSMR	Protein kinase family protein	PF12796: Ankyrin repeats (3 copies); PF07714: Protein tyrosine kinase	IPR000719: Protein kinase domain; IPR001245: Serine-threonine/tyrosine-protein kinase, catalytic domain; IPR002110: Ankyrin repeat; IPR011009: Protein kinase-like domain; IPR020635: Tyrosine-protein kinase, catalytic domain; IPR020683: Ankyrin repeat-containing domain	GO:0004672 MF: protein kinase activity;GO:0004713 MF: protein tyrosine kinase activity;GO:0005515 MF: protein binding;GO:0005524 MF: ATP binding;GO:0006468 BP: protein phosphorylation	G	PF12796; PF07714	IPR000719; IPR001245; IPR002110; IPR011009; IPR020635; IPR020683	GO:0004672; GO:0004713; GO:0005515; GO:0005524; GO:0006468
TraesCS6B02G197500.1	1	*-*	tr|M8AZK6|M8AZK6_TRIUA	Methyl-CpG-binding domain-containing protein 9	PF00439: Bromodomain; PF00628: PHD-finger; PF15612: WSTF, HB1, Itc1p, MBD9 motif 1; PF15613: Williams-Beuren syndrome DDT (WSD), D-TOX E motif	IPR001487: Bromodomain; IPR001965: Zinc finger, PHD-type; IPR003888: FY-rich, N-terminal; IPR003889: FY-rich, C-terminal; IPR011011: Zinc finger, FYVE/PHD-type; IPR013083: Zinc finger, RING/FYVE/PHD-type; IPR019786: Zinc finger, PHD-type, conserved site; IPR019787: Zinc finger, PHD-finger; IPR028941: WHIM2 domain; IPR028942: WHIM1 domain	GO:0005515 MF: protein binding;GO:0005634 CC: nucleus;GO:0008270 MF: zinc ion binding	G	PF00439; PF00628; PF15612; PF15613	IPR001487; IPR001965; IPR003888; IPR003889; IPR011011; IPR013083; IPR019786; IPR019787; IPR028941; IPR028942	GO:0005515; GO:0005634; GO:0008270
TraesCS4D02G174800.1	1	***	tr|A0A1D5Y0S6|A0A1D5Y0S6_WHEAT	Hexosyltransferase	PF01501: Glycosyl transferase family 8	IPR002495: Glycosyl transferase, family 8; IPR029044: Nucleotide-diphospho-sugar transferases	GO:0016757 MF: transferase activity, transferring glycosyl groups	G	PF01501	IPR002495; IPR029044	GO:0016757
TraesCS2A02G255900.1	1	*-*	tr|D7LKF9|D7LKF9_ARALL	Zinc finger family protein	PF13912: C2H2-type zinc finger	IPR013087: Zinc finger C2H2-type	GO:0003676 MF: nucleic acid binding	TE?	PF13912	IPR013087	GO:0003676
TraesCS1B02G314900.5	0	***	tr|B6SVB8|B6SVB8_MAIZE	CCR4-NOT transcription complex subunit 2	PF04153: NOT2 / NOT3 / NOT5 family	IPR007282: NOT2/NOT3/NOT5	GO:0005634 CC: nucleus;GO:0006355 BP: regulation of transcription, DNA-templated	G	PF04153	IPR007282	GO:0005634; GO:0006355
TraesCS2A02G535000.1	1	--*	AT5G45050.4	Disease resistance protein (TIR-NBS-LRR class)	PF06108: Protein of unknown function (DUF952)	IPR009297: Protein of unknown function DUF952		G	PF06108	IPR009297
TraesCS2B02G229500.2	0	***	tr|A0A1D6HK60|A0A1D6HK60_MAIZE	Kinesin-like protein	PF00225: Kinesin motor domain	IPR001752: Kinesin motor domain; IPR019821: Kinesin motor domain, conserved site; IPR027417: P-loop containing nucleoside triphosphate hydrolase	GO:0003777 MF: microtubule motor activity;GO:0005524 MF: ATP binding;GO:0007018 BP: microtubule-based movement;GO:0008017 MF: microtubule binding	G	PF00225	IPR001752; IPR019821; IPR027417	GO:0003777; GO:0005524; GO:0007018; GO:0008017
TraesCS2B02G229500.1	1	***	tr|A0A1D6HK60|A0A1D6HK60_MAIZE	Kinesin-like protein	PF00225: Kinesin motor domain	IPR001752: Kinesin motor domain; IPR019821: Kinesin motor domain, conserved site; IPR027417: P-loop containing nucleoside triphosphate hydrolase	GO:0003777 MF: microtubule motor activity;GO:0005524 MF: ATP binding;GO:0007018 BP: microtubule-based movement;GO:0008017 MF: microtubule binding	G	PF00225	IPR001752; IPR019821; IPR027417	GO:0003777; GO:0005524; GO:0007018; GO:0008017
TraesCS2D02G433600.1	1	*-*	tr|A0A061E5X1|A0A061E5X1_THECC	Pollen Ole e 1 allergen and extensin family protein, putative	PF01190: Pollen proteins Ole e I like			G	PF01190
TraesCS5A02G449300.1	1	***	tr|A0A0B0P5F6|A0A0B0P5F6_GOSAR	Transcription initiation factor TFIID subunit 8				G
TraesCS5B02G093200.2	1	***	tr|M8ACV9|M8ACV9_TRIUA	Nuclear export mediator factor Nemf	PF05833: Fibronectin-binding protein A N-terminus (FbpA); PF05670: Domain of unknown function (DUF814); PF00098: Zinc knuckle; PF11923: Domain of unknown function (DUF3441)	IPR001878: Zinc finger, CCHC-type; IPR008532: Domain of unknown function DUF814; IPR021846: Domain of unknown function DUF3441	GO:0003676 MF: nucleic acid binding;GO:0008270 MF: zinc ion binding	TE?	PF05833; PF05670; PF00098; PF11923	IPR001878; IPR008532; IPR021846	GO:0003676; GO:0008270
TraesCS5A02G174800.1	1	--*	tr|W9S0M8|W9S0M8_9ROSA	2,3-bisphosphoglycerate-dependent phosphoglycerate mutase	PF00300: Histidine phosphatase superfamily (branch 1)	IPR013078: Histidine phosphatase superfamily, clade-1; IPR029033: Histidine phosphatase superfamily		G	PF00300	IPR013078; IPR029033
TraesCS2A02G567800.1	1	***	tr|B7ETX1|B7ETX1_ORYSJ	cDNA clone:J033115O13, full insert sequence				G
TraesCS4D02G034400.1	1	***	tr|M8BPG1|M8BPG1_AEGTA	Alkaline ceramidase 3	PF05875: Ceramidase	IPR008901: Ceramidase	GO:0006672 BP: ceramide metabolic process;GO:0016021 CC: integral component of membrane;GO:0016811 MF: hydrolase activity, acting on carbon-nitrogen (but not peptide) bonds, in linear amides	G	PF05875	IPR008901	GO:0006672; GO:0016021; GO:0016811
TraesCS5B02G433300.1	1	***	tr|A0A061F1N8|A0A061F1N8_THECC	Kinase family protein	PF00069: Protein kinase domain	IPR000719: Protein kinase domain; IPR008271: Serine/threonine-protein kinase, active site; IPR011009: Protein kinase-like domain; IPR017441: Protein kinase, ATP binding site	GO:0004672 MF: protein kinase activity;GO:0005524 MF: ATP binding;GO:0006468 BP: protein phosphorylation	G	PF00069	IPR000719; IPR008271; IPR011009; IPR017441	GO:0004672; GO:0005524; GO:0006468
TraesCS5B02G439500.1	1	***	tr|W5FDK7|W5FDK7_WHEAT	Histone H2A	PF00125: Core histone H2A/H2B/H3/H4; PF16211: C-terminus of histone H2A	IPR002119: Histone H2A; IPR007125: Histone H2A/H2B/H3; IPR009072: Histone-fold; IPR032454: Histone H2A, C-terminal domain; IPR032458: Histone H2A conserved site	GO:0000786 CC: nucleosome;GO:0003677 MF: DNA binding;GO:0005634 CC: nucleus;GO:0046982 MF: protein heterodimerization activity	G	PF00125; PF16211	IPR002119; IPR007125; IPR009072; IPR032454; IPR032458	GO:0000786; GO:0003677; GO:0005634; GO:0046982
TraesCS1D02G167300.2	0	***	tr|A0A0B0PIZ1|A0A0B0PIZ1_GOSAR	RING finger protein	PF14447: Prokaryotic RING finger family 4	IPR001841: Zinc finger, RING-type; IPR013083: Zinc finger, RING/FYVE/PHD-type; IPR017907: Zinc finger, RING-type, conserved site	GO:0005515 MF: protein binding;GO:0008270 MF: zinc ion binding	G	PF14447	IPR001841; IPR013083; IPR017907	GO:0005515; GO:0008270
TraesCS3D02G201600.1	1	***	tr|M8AYF6|M8AYF6_AEGTA	UDP-N-acetylglucosamine--N-acetylmuramyl-(Pentapeptide) pyrophosphoryl-undecaprenol N-acetylglucosamine transferase	PF03033: Glycosyltransferase family 28 N-terminal domain; PF04101: Glycosyltransferase family 28 C-terminal domain	IPR004276: Glycosyltransferase family 28, N-terminal domain; IPR006009: N-acetylglucosaminyltransferase, MurG; IPR007235: Glycosyl transferase, family 28, C-terminal	GO:0005975 BP: carbohydrate metabolic process;GO:0009252 BP: peptidoglycan biosynthetic process;GO:0016758 MF: transferase activity, transferring hexosyl groups;GO:0030259 BP: lipid glycosylation;GO:0050511 MF: undecaprenyldiphospho-muramoylpentapeptide beta-N-acetylglucosaminyltransferase activity	G	PF03033; PF04101	IPR004276; IPR006009; IPR007235	GO:0005975; GO:0009252; GO:0016758; GO:0030259; GO:0050511
TraesCS1D02G167300.1	1	***	tr|A0A0B0PIZ1|A0A0B0PIZ1_GOSAR	RING finger protein	PF14447: Prokaryotic RING finger family 4	IPR001841: Zinc finger, RING-type; IPR013083: Zinc finger, RING/FYVE/PHD-type; IPR017907: Zinc finger, RING-type, conserved site	GO:0005515 MF: protein binding;GO:0008270 MF: zinc ion binding	G	PF14447	IPR001841; IPR013083; IPR017907	GO:0005515; GO:0008270
TraesCS7D02G004500.1	1	***	tr|A0A096PAB8|A0A096PAB8_OSTTA	Glycine-tRNA ligase, alpha subunit	PF02091: Glycyl-tRNA synthetase alpha subunit; PF02092: Glycyl-tRNA synthetase beta subunit	IPR002310: Glycine-tRNA ligase, alpha subunit; IPR006194: Glycine-tRNA synthetase, heterodimeric; IPR009080: Aminoacyl-tRNA synthetase, class Ia, anticodon-binding; IPR015944: Glycine-tRNA ligase, beta subunit	GO:0000166 MF: nucleotide binding;GO:0004812 MF: aminoacyl-tRNA ligase activity;GO:0004820 MF: glycine-tRNA ligase activity;GO:0005524 MF: ATP binding;GO:0005737 CC: cytoplasm;GO:0006418 BP: tRNA aminoacylation for protein translation;GO:0006426 BP: glycyl-tRNA aminoacylation	G	PF02091; PF02092	IPR002310; IPR006194; IPR009080; IPR015944	GO:0000166; GO:0004812; GO:0004820; GO:0005524; GO:0005737; GO:0006418; GO:0006426
TraesCS2B02G527700.1	1	***	tr|G7IP73|G7IP73_MEDTR	DUF1365 family protein	PF07103: Protein of unknown function (DUF1365)	IPR010775: Protein of unknown function DUF1365		G	PF07103	IPR010775
TraesCS4A02G246900.1	1	***	tr|A0A0K9NN67|A0A0K9NN67_ZOSMR	Peptidyl-prolyl cis-trans isomerase	PF04979: Protein phosphatase inhibitor 2 (IPP-2)	IPR007062: Protein phosphatase inhibitor 2 (IPP-2)	GO:0004864 MF: protein phosphatase inhibitor activity;GO:0009966 BP: regulation of signal transduction;GO:0043666 BP: regulation of phosphoprotein phosphatase activity	G	PF04979	IPR007062	GO:0004864; GO:0009966; GO:0043666
TraesCS1D02G252900.1	1	***	tr|A0A1D6D8L9|A0A1D6D8L9_WHEAT	Pyruvate, phosphate dikinase	PF01326: Pyruvate phosphate dikinase, PEP/pyruvate binding domain; PF00391: PEP-utilising enzyme, mobile domain; PF02896: PEP-utilising enzyme, TIM barrel domain	IPR000121: PEP-utilising enzyme, C-terminal; IPR002192: Pyruvate phosphate dikinase, PEP/pyruvate-binding; IPR008279: PEP-utilising enzyme, mobile domain; IPR010121: Pyruvate, phosphate dikinase; IPR013815: ATP-grasp fold, subdomain 1; IPR015813: Pyruvate/Phosphoenolpyruvate kinase-like domain; IPR018274: PEP-utilising enzyme, active site; IPR023151: PEP-utilising enzyme, conserved site	GO:0003824 MF: catalytic activity;GO:0005524 MF: ATP binding;GO:0006090 BP: pyruvate metabolic process;GO:0016301 MF: kinase activity;GO:0016310 BP: phosphorylation;GO:0016772 MF: transferase activity, transferring phosphorus-containing groups;GO:0050242 MF: pyruvate, phosphate dikinase activity	G	PF01326; PF00391; PF02896	IPR000121; IPR002192; IPR008279; IPR010121; IPR013815; IPR015813; IPR018274; IPR023151	GO:0003824; GO:0005524; GO:0006090; GO:0016301; GO:0016310; GO:0016772; GO:0050242
TraesCS1D02G252900.2	0	***	tr|A0A1D6D8L9|A0A1D6D8L9_WHEAT	Pyruvate, phosphate dikinase	PF01326: Pyruvate phosphate dikinase, PEP/pyruvate binding domain; PF00391: PEP-utilising enzyme, mobile domain; PF02896: PEP-utilising enzyme, TIM barrel domain	IPR000121: PEP-utilising enzyme, C-terminal; IPR002192: Pyruvate phosphate dikinase, PEP/pyruvate-binding; IPR008279: PEP-utilising enzyme, mobile domain; IPR010121: Pyruvate, phosphate dikinase; IPR013815: ATP-grasp fold, subdomain 1; IPR015813: Pyruvate/Phosphoenolpyruvate kinase-like domain; IPR018274: PEP-utilising enzyme, active site	GO:0003824 MF: catalytic activity;GO:0005524 MF: ATP binding;GO:0006090 BP: pyruvate metabolic process;GO:0016301 MF: kinase activity;GO:0016310 BP: phosphorylation;GO:0016772 MF: transferase activity, transferring phosphorus-containing groups;GO:0050242 MF: pyruvate, phosphate dikinase activity	G	PF01326; PF00391; PF02896	IPR000121; IPR002192; IPR008279; IPR010121; IPR013815; IPR015813; IPR018274	GO:0003824; GO:0005524; GO:0006090; GO:0016301; GO:0016310; GO:0016772; GO:0050242
TraesCS3B02G279600.1	1	***	tr|A0A1E5WG65|A0A1E5WG65_9POAL	Protein REVERSION-TO-ETHYLENE SENSITIVITY1	PF05608: Protein of unknown function (DUF778)	IPR008496: Protein of unknown function DUF778		G	PF05608	IPR008496
TraesCS6D02G122600.1	1	*-*	tr|A0A061GBK3|A0A061GBK3_THECC	Regulator of Vps4 activity in the MVB pathway protein, putative	PF03398: Regulator of Vps4 activity in the MVB pathway	IPR005061: Vacuolar protein sorting-associated protein Ist1	GO:0015031 BP: protein transport	G	PF03398	IPR005061	GO:0015031
TraesCS5D02G202400.1	1	***	tr|N1QPD5|N1QPD5_AEGTA	Subtilisin-like protease	PF05922: Peptidase inhibitor I9; PF00082: Subtilase family	IPR000209: Peptidase S8/S53 domain; IPR009020: Protease propeptides/proteinase inhibitor I9; IPR010259: Peptidase S8 propeptide/proteinase inhibitor I9; IPR015500: Peptidase S8, subtilisin-related; IPR022398: Peptidase S8, subtilisin, His-active site; IPR023828: Peptidase S8, subtilisin, Ser-active site	GO:0004252 MF: serine-type endopeptidase activity;GO:0006508 BP: proteolysis	G	PF05922; PF00082	IPR000209; IPR009020; IPR010259; IPR015500; IPR022398; IPR023828	GO:0004252; GO:0006508
TraesCS5B02G277100.1	1	***	tr|M7ZGE4|M7ZGE4_TRIUA	Crooked neck-like protein 1	PF02184: HAT (Half-A-TPR) repeat	IPR003107: HAT (Half-A-TPR) repeat; IPR011990: Tetratricopeptide-like helical domain	GO:0005515 MF: protein binding;GO:0006396 BP: RNA processing	G	PF02184	IPR003107; IPR011990	GO:0005515; GO:0006396
TraesCS2B02G476000.1	1	*-*	AT4G17670.1	senescence-associated family protein (DUF581)	PF04570: zinc-finger of the FCS-type, C2-C2	IPR007650: Zf-FLZ domain		G	PF04570	IPR007650
TraesCS5A02G326500.1	1	***	tr|A0A1J6K1S3|A0A1J6K1S3_NICAT	F-box protein	PF00646: F-box domain; PF08268: F-box associated domain	IPR001810: F-box domain; IPR013187: F-box associated domain, type 3; IPR015915: Kelch-type beta propeller; IPR017451: F-box associated interaction domain	GO:0005515 MF: protein binding	TE?	PF00646; PF08268	IPR001810; IPR013187; IPR015915; IPR017451	GO:0005515
TraesCS6B02G455100.1	1	***	sp|Q0A4T8|HLDD_ALKEH	ADP-L-glycero-D-manno-heptose-6-epimerase	PF04321: RmlD substrate binding domain	IPR016040: NAD(P)-binding domain; IPR029903: RmlD-like substrate binding domain		G	PF04321	IPR016040; IPR029903
TraesCS1A02G200600.1	1	--*	sp|Q8VBX4|CLC4K_MOUSE	C-type lectin domain family 4 member K				G
TraesCS1D02G023700.1	1	***	tr|Q7XTK1|Q7XTK1_ORYSJ	Elongation factor	PF00009: Elongation factor Tu GTP binding domain; PF03144: Elongation factor Tu domain 2; PF03764: Elongation factor G, domain IV; PF00679: Elongation factor G C-terminus	IPR000640: Translation elongation factor EFG, V domain; IPR000795: Transcription factor, GTP-binding domain; IPR004161: Translation elongation factor EFTu-like, domain 2; IPR005225: Small GTP-binding protein domain; IPR005517: Translation elongation factor EFG/EF2, domain IV; IPR009000: Translation protein, beta-barrel domain; IPR009022: Elongation factor G, III-V domain; IPR014721: Ribosomal pro…	GO:0003924 MF: GTPase activity;GO:0005525 MF: GTP binding	G	PF00009; PF03144; PF03764; PF00679	IPR000640; IPR000795; IPR004161; IPR005225; IPR005517; IPR009000; IPR009022; IPR014721; IPR020568; IPR027417; IPR031157	GO:0003924; GO:0005525
TraesCS3B02G356400.1	1	--*	tr|B8Q5G0|B8Q5G0_LUPAN	Conglutin beta				G
TraesCS7D02G429400.1	1	***	tr|A0A178VCK6|A0A178VCK6_ARATH	2-oxoglutarate (2OG) and Fe(II)-dependent oxygenase superfamily protein	PF14226: non-haem dioxygenase in morphine synthesis N-terminal; PF03171: 2OG-Fe(II) oxygenase superfamily	IPR005123: Oxoglutarate/iron-dependent dioxygenase; IPR026992: Non-haem dioxygenase N-terminal domain; IPR027443: Isopenicillin N synthase-like	GO:0016491 MF: oxidoreductase activity;GO:0055114 BP: oxidation-reduction process	G	PF14226; PF03171	IPR005123; IPR026992; IPR027443	GO:0016491; GO:0055114
TraesCS6A02G231400.3	1	***	tr|A0A1D1YV29|A0A1D1YV29_9ARAE	Sister chromatid cohesion protein PDS5 B-B		IPR011989: Armadillo-like helical; IPR016024: Armadillo-type fold	GO:0005488 MF: binding	G		IPR011989; IPR016024	GO:0005488
TraesCS5D02G127800.1	1	*-*	tr|A0A1D1YUK5|A0A1D1YUK5_9ARAE	Protein SUPPRESSOR OF GENE SILENCING 3	PF03468: XS domain	IPR005380: XS domain	GO:0031047 BP: gene silencing by RNA	G	PF03468	IPR005380	GO:0031047
TraesCS6A02G231400.1	0	***	tr|A0A1D1YV29|A0A1D1YV29_9ARAE	Sister chromatid cohesion protein PDS5 B-B		IPR011989: Armadillo-like helical; IPR016024: Armadillo-type fold	GO:0005488 MF: binding	G		IPR011989; IPR016024	GO:0005488
TraesCS6A02G231400.4	0	***	tr|A0A1D1YV29|A0A1D1YV29_9ARAE	Sister chromatid cohesion protein PDS5 B-B		IPR011989: Armadillo-like helical; IPR016024: Armadillo-type fold	GO:0005488 MF: binding	G		IPR011989; IPR016024	GO:0005488
TraesCS5A02G498300.1	1	*-*	tr|A0A061R3Q9|A0A061R3Q9_9CHLO	Calcium-dependent protein kinase	PF00036: EF hand	IPR002048: EF-hand domain; IPR011992: EF-hand domain pair; IPR018247: EF-Hand 1, calcium-binding site	GO:0005509 MF: calcium ion binding	G	PF00036	IPR002048; IPR011992; IPR018247	GO:0005509
TraesCS5D02G333400.3	0	***	tr|W9RHI7|W9RHI7_9ROSA	5'-3' exoribonuclease 3	PF03159: XRN 5'-3' exonuclease N-terminus	IPR004859: Putative 5-3 exonuclease	GO:0003676 MF: nucleic acid binding;GO:0004527 MF: exonuclease activity	G	PF03159	IPR004859	GO:0003676; GO:0004527
TraesCS2B02G579100.1	1	***	tr|B9H3J5|B9H3J5_POPTR	Amine oxidase family protein	PF01593: Flavin containing amine oxidoreductase	IPR001613: Flavin amine oxidase; IPR002937: Amine oxidase; IPR023753: FAD/NAD(P)-binding domain	GO:0016491 MF: oxidoreductase activity;GO:0055114 BP: oxidation-reduction process	G	PF01593	IPR001613; IPR002937; IPR023753	GO:0016491; GO:0055114
TraesCS5B02G529400.1	1	***	tr|A0A166GK49|A0A166GK49_DAUCA	Carotenoid isomerase	PF01593: Flavin containing amine oxidoreductase	IPR002937: Amine oxidase; IPR023753: FAD/NAD(P)-binding domain	GO:0016491 MF: oxidoreductase activity;GO:0055114 BP: oxidation-reduction process	G	PF01593	IPR002937; IPR023753	GO:0016491; GO:0055114
TraesCS6D02G377700.1	1	*-*	tr|A0A1J6IHD4|A0A1J6IHD4_NICAT	Protein plastid movement impaired 1-related 1				G
TraesCS6B02G090400.1	1	***	tr|B9RD38|B9RD38_RICCO	Pentatricopeptide repeat-containing protein, putative	PF01535: PPR repeat; PF12854: PPR repeat; PF13041: PPR repeat family	IPR002885: Pentatricopeptide repeat; IPR011990: Tetratricopeptide-like helical domain	GO:0005515 MF: protein binding	G	PF01535; PF12854; PF13041	IPR002885; IPR011990	GO:0005515
TraesCS4D02G238100.1	1	*-*	tr|A0A0B0PJN2|A0A0B0PJN2_GOSAR	Calcium uniporter, mitochondrial	PF04678: Mitochondrial calcium uniporter	IPR006769: Coiled-coil domain containing protein 109, C-terminal		G	PF04678	IPR006769
TraesCS7B02G272500.1	1	*-*	tr|A0A072UBW9|A0A072UBW9_MEDTR	Heat shock transcription factor	PF00447: HSF-type DNA-binding	IPR000232: Heat shock factor (HSF)-type, DNA-binding; IPR011991: Winged helix-turn-helix DNA-binding domain	GO:0003700 MF: transcription factor activity, sequence-specific DNA binding;GO:0005634 CC: nucleus;GO:0006355 BP: regulation of transcription, DNA-templated;GO:0043565 MF: sequence-specific DNA binding	G	PF00447	IPR000232; IPR011991	GO:0003700; GO:0005634; GO:0006355; GO:0043565
TraesCS2B02G468800.1	1	--*	sp|Q8ZKQ0|LSRF_SALTY	3-hydroxy-5-phosphonooxypentane-2,4-dione thiolase				G
TraesCS7A02G339000.1	1	*-*	tr|A0A0K9NNV3|A0A0K9NNV3_ZOSMR	Basic helix-loop-helix (BHLH) DNA-binding superfamily		IPR011598: Myc-type, basic helix-loop-helix (bHLH) domain	GO:0046983 MF: protein dimerization activity	G		IPR011598	GO:0046983
TraesCS4D02G350200.1	1	***	tr|A0A1E5VXN1|A0A1E5VXN1_9POAL	COP9 signalosome complex subunit 1	PF10602: 26S proteasome subunit RPN7; PF01399: PCI domain	IPR000717: Proteasome component (PCI) domain; IPR011991: Winged helix-turn-helix DNA-binding domain; IPR019585: 26S proteasome regulatory subunit Rpn7/COP9 signalosome complex subunit 1	GO:0005515 MF: protein binding	G	PF10602; PF01399	IPR000717; IPR011991; IPR019585	GO:0005515
TraesCS3D02G135500.1	0	***	tr|A0A1D5WUL9|A0A1D5WUL9_WHEAT	Importin subunit alpha	PF00514: Armadillo/beta-catenin-like repeat	IPR000225: Armadillo; IPR011989: Armadillo-like helical; IPR016024: Armadillo-type fold; IPR024931: Importin subunit alpha	GO:0005488 MF: binding;GO:0005515 MF: protein binding;GO:0005634 CC: nucleus;GO:0005737 CC: cytoplasm;GO:0006606 BP: protein import into nucleus;GO:0008565 MF: protein transporter activity	G	PF00514	IPR000225; IPR011989; IPR016024; IPR024931	GO:0005488; GO:0005515; GO:0005634; GO:0005737; GO:0006606; GO:0008565
TraesCS3D02G135500.2	1	***	tr|A0A1D5WUL9|A0A1D5WUL9_WHEAT	Importin subunit alpha	PF00514: Armadillo/beta-catenin-like repeat	IPR000225: Armadillo; IPR011989: Armadillo-like helical; IPR016024: Armadillo-type fold	GO:0005488 MF: binding;GO:0005515 MF: protein binding	G	PF00514	IPR000225; IPR011989; IPR016024	GO:0005488; GO:0005515
TraesCS2D02G378500.1	0	***	tr|A0A0K9NL88|A0A0K9NL88_ZOSMR	Histone-lysine N-methyltransferase	PF10440: Ubiquitin-binding WIYLD domain; PF05033: Pre-SET motif; PF00856: SET domain	IPR001214: SET domain; IPR003616: Post-SET domain; IPR007728: Pre-SET domain; IPR018848: WIYLD domain; IPR025776: Histone-lysine N-methyltransferase SUVR4/SUVR1/SUVR2	GO:0005515 MF: protein binding;GO:0005634 CC: nucleus;GO:0008270 MF: zinc ion binding;GO:0018024 MF: histone-lysine N-methyltransferase activity;GO:0034968 BP: histone lysine methylation	G	PF10440; PF05033; PF00856	IPR001214; IPR003616; IPR007728; IPR018848; IPR025776	GO:0005515; GO:0005634; GO:0008270; GO:0018024; GO:0034968
TraesCS2D02G378500.3	1	***	tr|A0A0K9P0B7|A0A0K9P0B7_ZOSMR	Histone-lysine N-methyltransferase	PF10440: Ubiquitin-binding WIYLD domain; PF05033: Pre-SET motif; PF00856: SET domain	IPR001214: SET domain; IPR003616: Post-SET domain; IPR007728: Pre-SET domain; IPR018848: WIYLD domain; IPR025776: Histone-lysine N-methyltransferase SUVR4/SUVR1/SUVR2	GO:0005515 MF: protein binding;GO:0005634 CC: nucleus;GO:0008270 MF: zinc ion binding;GO:0018024 MF: histone-lysine N-methyltransferase activity;GO:0034968 BP: histone lysine methylation	G	PF10440; PF05033; PF00856	IPR001214; IPR003616; IPR007728; IPR018848; IPR025776	GO:0005515; GO:0005634; GO:0008270; GO:0018024; GO:0034968
TraesCS2D02G378500.2	0	*-*	tr|A0A0K9P0B7|A0A0K9P0B7_ZOSMR	Histone-lysine N-methyltransferase	PF10440: Ubiquitin-binding WIYLD domain; PF05033: Pre-SET motif; PF00856: SET domain	IPR001214: SET domain; IPR003616: Post-SET domain; IPR007728: Pre-SET domain; IPR018848: WIYLD domain; IPR025776: Histone-lysine N-methyltransferase SUVR4/SUVR1/SUVR2	GO:0005515 MF: protein binding;GO:0005634 CC: nucleus;GO:0008270 MF: zinc ion binding;GO:0018024 MF: histone-lysine N-methyltransferase activity;GO:0034968 BP: histone lysine methylation	G	PF10440; PF05033; PF00856	IPR001214; IPR003616; IPR007728; IPR018848; IPR025776	GO:0005515; GO:0005634; GO:0008270; GO:0018024; GO:0034968
TraesCS2D02G378500.4	0	***	tr|A0A0K9P0B7|A0A0K9P0B7_ZOSMR	Histone-lysine N-methyltransferase	PF10440: Ubiquitin-binding WIYLD domain; PF05033: Pre-SET motif; PF00856: SET domain	IPR001214: SET domain; IPR007728: Pre-SET domain; IPR018848: WIYLD domain; IPR025776: Histone-lysine N-methyltransferase SUVR4/SUVR1/SUVR2	GO:0005515 MF: protein binding;GO:0005634 CC: nucleus;GO:0008270 MF: zinc ion binding;GO:0018024 MF: histone-lysine N-methyltransferase activity;GO:0034968 BP: histone lysine methylation	G	PF10440; PF05033; PF00856	IPR001214; IPR007728; IPR018848; IPR025776	GO:0005515; GO:0005634; GO:0008270; GO:0018024; GO:0034968
TraesCS6B02G114500.1	1	--*	AT3G56470.1	F-box family protein	PF00646: F-box domain; PF03478: Protein of unknown function (DUF295)	IPR001810: F-box domain; IPR005174: Domain unknown function DUF295	GO:0005515 MF: protein binding	TE?	PF00646; PF03478	IPR001810; IPR005174	GO:0005515
TraesCS2A02G512500.1	1	***	tr|B9T4U3|B9T4U3_RICCO	Receptor protein kinase, putative	PF00069: Protein kinase domain	IPR000719: Protein kinase domain; IPR011009: Protein kinase-like domain; IPR032675: Leucine-rich repeat domain, L domain-like	GO:0004672 MF: protein kinase activity;GO:0005524 MF: ATP binding;GO:0006468 BP: protein phosphorylation	G	PF00069	IPR000719; IPR011009; IPR032675	GO:0004672; GO:0005524; GO:0006468
TraesCS5A02G206800.1	1	*-*	tr|A9X4C3|A9X4C3_9ASTR	Small heat shock protein	PF00011: Hsp20/alpha crystallin family	IPR002068: Alpha crystallin/Hsp20 domain; IPR008978: HSP20-like chaperone		G	PF00011	IPR002068; IPR008978
TraesCS5A02G370800.1	1	***	tr|G9JJS4|G9JJS4_ZIZJJ	Elongation factor	PF00009: Elongation factor Tu GTP binding domain; PF03144: Elongation factor Tu domain 2; PF00679: Elongation factor G C-terminus	IPR000640: Translation elongation factor EFG, V domain; IPR000795: Transcription factor, GTP-binding domain; IPR004161: Translation elongation factor EFTu-like, domain 2; IPR009000: Translation protein, beta-barrel domain; IPR009022: Elongation factor G, III-V domain; IPR014721: Ribosomal protein S5 domain 2-type fold, subgroup; IPR020568: Ribosomal protein S5 domain 2-type fold; IPR027417: P-loo…	GO:0003924 MF: GTPase activity;GO:0005525 MF: GTP binding	G	PF00009; PF03144; PF00679	IPR000640; IPR000795; IPR004161; IPR009000; IPR009022; IPR014721; IPR020568; IPR027417	GO:0003924; GO:0005525
TraesCS7A02G357800.1	0	***	tr|A0A103YB79|A0A103YB79_CYNCS	Inositol oxygenase	PF05153: Myo-inositol oxygenase	IPR007828: Inositol oxygenase	GO:0005506 MF: iron ion binding;GO:0005737 CC: cytoplasm;GO:0019310 BP: inositol catabolic process;GO:0050113 MF: inositol oxygenase activity;GO:0055114 BP: oxidation-reduction process	G	PF05153	IPR007828	GO:0005506; GO:0005737; GO:0019310; GO:0050113; GO:0055114
TraesCS1D02G442900.1	1	***	tr|C0PMA6|C0PMA6_MAIZE	Cytoplasmic membrane protein	PF09835: Uncharacterized protein conserved in bacteria (DUF2062)	IPR018639: Domain of unknown function DUF2062		G	PF09835	IPR018639
TraesCS6A02G286300.1	1	*-*	tr|A0A1D1XZE3|A0A1D1XZE3_9ARAE	DNA-directed RNA polymerase II subunit rpb4	PF03874: RNA polymerase Rpb4	IPR005574: RNA polymerase II, Rpb4; IPR006590: RNA polymerase II, Rpb4, core; IPR010997: HRDC-like	GO:0000166 MF: nucleotide binding;GO:0003824 MF: catalytic activity;GO:0003899 MF: DNA-directed 5'-3' RNA polymerase activity;GO:0006351 BP: transcription, DNA-templated;GO:0044237 BP: cellular metabolic process	G	PF03874	IPR005574; IPR006590; IPR010997	GO:0000166; GO:0003824; GO:0003899; GO:0006351; GO:0044237
TraesCS6A02G035800.1	1	***	tr|Q2RAY1|Q2RAY1_ORYSJ	Heterogeneous nuclear ribonucleoprotein, putative, expressed	PF00076: RNA recognition motif. (a.k.a. RRM, RBD, or RNP domain)	IPR000504: RNA recognition motif domain	GO:0003676 MF: nucleic acid binding	G	PF00076	IPR000504	GO:0003676
TraesCS4A02G048400.1	1	*-*	tr|G7JIU5|G7JIU5_MEDTR	DCD (Development and cell death) domain protein	PF10539: Development and cell death domain	IPR013989: Development/cell death domain		G	PF10539	IPR013989
TraesCS2B02G309300.1	0	*-*	AT1G67390.1	F-box family protein		IPR001810: F-box domain; IPR032675: Leucine-rich repeat domain, L domain-like	GO:0005515 MF: protein binding	TE?		IPR001810; IPR032675	GO:0005515
TraesCS2B02G309300.3	1	*-*	AT1G67390.1	F-box family protein		IPR001810: F-box domain; IPR032675: Leucine-rich repeat domain, L domain-like	GO:0005515 MF: protein binding	TE?		IPR001810; IPR032675	GO:0005515
TraesCS2B02G309300.2	0	*-*	AT1G67390.1	F-box family protein		IPR001810: F-box domain; IPR032675: Leucine-rich repeat domain, L domain-like	GO:0005515 MF: protein binding	TE?		IPR001810; IPR032675	GO:0005515
TraesCS2D02G293800.1	1	***	tr|A0A0K9PX67|A0A0K9PX67_ZOSMR	OTU domain-containing protein	PF02338: OTU-like cysteine protease	IPR003323: OTU domain		G	PF02338	IPR003323
TraesCS7A02G142500.1	1	***	AT3G02645.1	transmembrane protein, putative (DUF247)	PF03140: Plant protein of unknown function	IPR004158: Protein of unknown function DUF247, plant		G	PF03140	IPR004158
TraesCS4B02G151200.1	1	*-*	tr|A0A199W9U5|A0A199W9U5_ANACO	E3 ubiquitin-protein ligase	PF13923: Zinc finger, C3HC4 type (RING finger); PF02190: ATP-dependent protease La (LON) substrate-binding domain	IPR001841: Zinc finger, RING-type; IPR003111: Lon, substrate-binding domain; IPR011990: Tetratricopeptide-like helical domain; IPR013083: Zinc finger, RING/FYVE/PHD-type; IPR015947: PUA-like domain; IPR017907: Zinc finger, RING-type, conserved site	GO:0005515 MF: protein binding;GO:0008270 MF: zinc ion binding	G	PF13923; PF02190	IPR001841; IPR003111; IPR011990; IPR013083; IPR015947; IPR017907	GO:0005515; GO:0008270
TraesCS3A02G426800.1	0	***	tr|W9S4A0|W9S4A0_9ROSA	Acyl-[acyl-carrier-protein] desaturase	PF03405: Fatty acid desaturase	IPR005067: Fatty acid desaturase, type 2; IPR009078: Ferritin-like superfamily	GO:0006631 BP: fatty acid metabolic process;GO:0045300 MF: acyl-[acyl-carrier-protein] desaturase activity;GO:0055114 BP: oxidation-reduction process	G	PF03405	IPR005067; IPR009078	GO:0006631; GO:0045300; GO:0055114
TraesCS1B02G246000.1	1	***	tr|A0A1E5UV26|A0A1E5UV26_9POAL	Protein FLX-like 3				G
TraesCS3A02G426800.3	1	***	tr|W9S4A0|W9S4A0_9ROSA	Acyl-[acyl-carrier-protein] desaturase	PF03405: Fatty acid desaturase	IPR005067: Fatty acid desaturase, type 2; IPR009078: Ferritin-like superfamily	GO:0006631 BP: fatty acid metabolic process;GO:0045300 MF: acyl-[acyl-carrier-protein] desaturase activity;GO:0055114 BP: oxidation-reduction process	G	PF03405	IPR005067; IPR009078	GO:0006631; GO:0045300; GO:0055114
TraesCS1D02G242800.1	1	***	tr|R7W2V9|R7W2V9_AEGTA	AP2-like ethylene-responsive transcription factor	PF00847: AP2 domain	IPR001471: AP2/ERF domain; IPR016177: DNA-binding domain	GO:0003677 MF: DNA binding;GO:0003700 MF: transcription factor activity, sequence-specific DNA binding;GO:0006355 BP: regulation of transcription, DNA-templated	G	PF00847	IPR001471; IPR016177	GO:0003677; GO:0003700; GO:0006355
TraesCS7A02G249300.1	1	***	tr|A7VM22|A7VM22_MARPO	Receptor-like kinase	PF00139: Legume lectin domain; PF00069: Protein kinase domain	IPR000719: Protein kinase domain; IPR001220: Legume lectin domain; IPR008271: Serine/threonine-protein kinase, active site; IPR011009: Protein kinase-like domain; IPR013320: Concanavalin A-like lectin/glucanase domain; IPR017441: Protein kinase, ATP binding site	GO:0004672 MF: protein kinase activity;GO:0005524 MF: ATP binding;GO:0006468 BP: protein phosphorylation;GO:0030246 MF: carbohydrate binding	G	PF00139; PF00069	IPR000719; IPR001220; IPR008271; IPR011009; IPR013320; IPR017441	GO:0004672; GO:0005524; GO:0006468; GO:0030246
TraesCS7A02G413700.3	0	*-*	tr|A0A061EE06|A0A061EE06_THECC	Plant protein 1589 of Uncharacterized protein function	PF09713: Plant protein 1589 of unknown function (A_thal_3526)	IPR006476: Conserved hypothetical protein CHP01589, plant		U	PF09713	IPR006476
TraesCS7A02G413700.2	0	***	AT3G10250.5	histidine-tRNA ligase	PF09713: Plant protein 1589 of unknown function (A_thal_3526)	IPR006476: Conserved hypothetical protein CHP01589, plant		G	PF09713	IPR006476
TraesCS7A02G413700.1	1	*-*	AT3G55240.1	Plant protein 1589 of unknown function	PF09713: Plant protein 1589 of unknown function (A_thal_3526)	IPR006476: Conserved hypothetical protein CHP01589, plant		U	PF09713	IPR006476
TraesCS5A02G320400.1	1	*-*	tr|B9S6E3|B9S6E3_RICCO	Alpha/beta hydrolase, putative	PF00875: DNA photolyase; PF12697: Alpha/beta hydrolase family	IPR000073: Alpha/beta hydrolase fold-1; IPR006050: DNA photolyase, N-terminal; IPR014729: Rossmann-like alpha/beta/alpha sandwich fold; IPR029058: Alpha/Beta hydrolase fold		G	PF00875; PF12697	IPR000073; IPR006050; IPR014729; IPR029058
TraesCS3B02G506800.1	1	***	tr|A0A061DNH5|A0A061DNH5_THECC	Tetraspanin family protein, putative				G
TraesCS3B02G506800.2	0	***	tr|A0A061DNH5|A0A061DNH5_THECC	Tetraspanin family protein, putative				G
TraesCS6D02G148000.1	1	***	tr|A0A172Q4G9|A0A172Q4G9_WHEAT	Nicotianamine synthase	PF03059: Nicotianamine synthase protein	IPR004298: Nicotianamine synthase; IPR029063: S-adenosyl-L-methionine-dependent methyltransferase	GO:0030410 MF: nicotianamine synthase activity;GO:0030418 BP: nicotianamine biosynthetic process	G	PF03059	IPR004298; IPR029063	GO:0030410; GO:0030418
TraesCS7B02G004600.1	1	***	tr|A0A072VFJ0|A0A072VFJ0_MEDTR	F-box plant-like protein, putative	PF14476: Petal formation-expressed	IPR027949: Petal formation-expressed		G	PF14476	IPR027949
TraesCS2A02G315300.1	1	***	tr|M8BNA3|M8BNA3_AEGTA	Glutamate decarboxylase	PF00282: Pyridoxal-dependent decarboxylase conserved domain	IPR002129: Pyridoxal phosphate-dependent decarboxylase; IPR010107: Glutamate decarboxylase; IPR015421: Pyridoxal phosphate-dependent transferase, major region, subdomain 1; IPR015422: Pyridoxal phosphate-dependent transferase, subdomain 2; IPR015424: Pyridoxal phosphate-dependent transferase	GO:0003824 MF: catalytic activity;GO:0004351 MF: glutamate decarboxylase activity;GO:0006536 BP: glutamate metabolic process;GO:0016831 MF: carboxy-lyase activity;GO:0019752 BP: carboxylic acid metabolic process;GO:0030170 MF: pyridoxal phosphate binding	G	PF00282	IPR002129; IPR010107; IPR015421; IPR015422; IPR015424	GO:0003824; GO:0004351; GO:0006536; GO:0016831; GO:0019752; GO:0030170
TraesCS3B02G388700.2	0	***	tr|B9HQD6|B9HQD6_POPTR	2-phosphoglycerate kinase-related family protein		IPR027417: P-loop containing nucleoside triphosphate hydrolase		G		IPR027417
TraesCS3B02G388700.1	1	***	tr|B9HQD6|B9HQD6_POPTR	2-phosphoglycerate kinase-related family protein		IPR027417: P-loop containing nucleoside triphosphate hydrolase		G		IPR027417
TraesCS5A02G128900.2	1	***	tr|A0A1D5YHI3|A0A1D5YHI3_WHEAT	HVA22-like protein	PF03134: TB2/DP1, HVA22 family	IPR004345: TB2/DP1/HVA22-related protein		G	PF03134	IPR004345
TraesCS5A02G128900.1	0	*-*	tr|A0A199URC3|A0A199URC3_ANACO	OTU domain-containing protein				G
TraesCS7A02G051100.1	1	***	tr|B4F7V5|B4F7V5_MAIZE	Glutamate formiminotransferase 1	PF07837: Formiminotransferase domain, N-terminal subdomain	IPR012886: Formiminotransferase, N-terminal subdomain; IPR013802: Formiminotransferase, C-terminal subdomain; IPR022384: Formiminotransferase subdomain	GO:0005542 MF: folic acid binding;GO:0008152 BP: metabolic process;GO:0016740 MF: transferase activity	G	PF07837	IPR012886; IPR013802; IPR022384	GO:0005542; GO:0008152; GO:0016740
TraesCS6A02G406400.1	1	***	tr|A0A199VW03|A0A199VW03_ANACO	Acyl-CoA-binding domain-containing protein 4	PF01344: Kelch motif; PF13415: Galactose oxidase, central domain	IPR006652: Kelch repeat type 1; IPR015915: Kelch-type beta propeller	GO:0005515 MF: protein binding	G	PF01344; PF13415	IPR006652; IPR015915	GO:0005515
TraesCS2B02G577800.1	1	***	tr|A0A061FJD6|A0A061FJD6_THECC	Exostosin family protein	PF03016: Exostosin family	IPR004263: Exostosin-like		G	PF03016	IPR004263
TraesCS1A02G301700.1	1	*-*	tr|A0A072UVU8|A0A072UVU8_MEDTR	Myb/SANT-like DNA-binding domain protein	PF12776: Myb/SANT-like DNA-binding domain	IPR024752: Myb/SANT-like domain		TE?	PF12776	IPR024752
TraesCS6D02G283200.1	1	***	tr|A0A072VN16|A0A072VN16_MEDTR	Trichome birefringence-like protein	PF14416: PMR5 N terminal Domain; PF13839: GDSL/SGNH-like Acyl-Esterase family found in Pmr5 and Cas1p	IPR025846: PMR5 N-terminal domain; IPR026057: PC-Esterase		G	PF14416; PF13839	IPR025846; IPR026057
TraesCS7D02G246300.1	1	*-*	tr|A0A1I9LQQ9|A0A1I9LQQ9_ARATH	RING/U-box superfamily protein	PF13639: Ring finger domain	IPR001841: Zinc finger, RING-type; IPR013083: Zinc finger, RING/FYVE/PHD-type	GO:0005515 MF: protein binding;GO:0008270 MF: zinc ion binding	G	PF13639	IPR001841; IPR013083	GO:0005515; GO:0008270
TraesCS4A02G036800.2	0	***	tr|A0A1D5XDB9|A0A1D5XDB9_WHEAT	Kinesin-like protein	PF00225: Kinesin motor domain; PF00514: Armadillo/beta-catenin-like repeat	IPR000225: Armadillo; IPR001752: Kinesin motor domain; IPR011989: Armadillo-like helical; IPR016024: Armadillo-type fold; IPR019821: Kinesin motor domain, conserved site; IPR027417: P-loop containing nucleoside triphosphate hydrolase	GO:0003777 MF: microtubule motor activity;GO:0005488 MF: binding;GO:0005515 MF: protein binding;GO:0005524 MF: ATP binding;GO:0007018 BP: microtubule-based movement;GO:0008017 MF: microtubule binding	G	PF00225; PF00514	IPR000225; IPR001752; IPR011989; IPR016024; IPR019821; IPR027417	GO:0003777; GO:0005488; GO:0005515; GO:0005524; GO:0007018; GO:0008017
TraesCS5A02G140200.1	1	***	tr|M8AFL6|M8AFL6_TRIUA	Protein ZINC INDUCED FACILITATOR-LIKE 1	PF07690: Major Facilitator Superfamily	IPR011701: Major facilitator superfamily; IPR020846: Major facilitator superfamily domain	GO:0016021 CC: integral component of membrane;GO:0055085 BP: transmembrane transport	G	PF07690	IPR011701; IPR020846	GO:0016021; GO:0055085
TraesCS4A02G036800.1	1	***	tr|A0A1D5XDB9|A0A1D5XDB9_WHEAT	Kinesin-like protein	PF00225: Kinesin motor domain; PF00514: Armadillo/beta-catenin-like repeat	IPR000225: Armadillo; IPR001752: Kinesin motor domain; IPR011989: Armadillo-like helical; IPR016024: Armadillo-type fold; IPR019821: Kinesin motor domain, conserved site; IPR027417: P-loop containing nucleoside triphosphate hydrolase	GO:0003777 MF: microtubule motor activity;GO:0005488 MF: binding;GO:0005515 MF: protein binding;GO:0005524 MF: ATP binding;GO:0007018 BP: microtubule-based movement;GO:0008017 MF: microtubule binding	G	PF00225; PF00514	IPR000225; IPR001752; IPR011989; IPR016024; IPR019821; IPR027417	GO:0003777; GO:0005488; GO:0005515; GO:0005524; GO:0007018; GO:0008017
TraesCS5A02G191900.1	1	*-*	tr|B9SN30|B9SN30_RICCO	LOB domain-containing protein, putative	PF03195: Protein of unknown function DUF260	IPR004883: Lateral organ boundaries, LOB		G	PF03195	IPR004883
TraesCS3D02G110700.2	0	***	tr|A0A077RTM4|A0A077RTM4_WHEAT	Malic enzyme	PF00390: Malic enzyme, N-terminal domain; PF03949: Malic enzyme, NAD binding domain	IPR001891: Malic oxidoreductase; IPR012301: Malic enzyme, N-terminal domain; IPR012302: Malic enzyme, NAD-binding; IPR015884: Malic enzyme, conserved site; IPR016040: NAD(P)-binding domain	GO:0004470 MF: malic enzyme activity;GO:0004471 MF: malate dehydrogenase (decarboxylating) (NAD+) activity;GO:0006108 BP: malate metabolic process;GO:0051287 MF: NAD binding;GO:0055114 BP: oxidation-reduction process	G	PF00390; PF03949	IPR001891; IPR012301; IPR012302; IPR015884; IPR016040	GO:0004470; GO:0004471; GO:0006108; GO:0051287; GO:0055114
TraesCS3D02G110700.1	1	***	tr|A0A077RTM4|A0A077RTM4_WHEAT	Malic enzyme	PF00390: Malic enzyme, N-terminal domain; PF03949: Malic enzyme, NAD binding domain	IPR001891: Malic oxidoreductase; IPR012301: Malic enzyme, N-terminal domain; IPR012302: Malic enzyme, NAD-binding; IPR015884: Malic enzyme, conserved site; IPR016040: NAD(P)-binding domain	GO:0004470 MF: malic enzyme activity;GO:0004471 MF: malate dehydrogenase (decarboxylating) (NAD+) activity;GO:0006108 BP: malate metabolic process;GO:0051287 MF: NAD binding;GO:0055114 BP: oxidation-reduction process	G	PF00390; PF03949	IPR001891; IPR012301; IPR012302; IPR015884; IPR016040	GO:0004470; GO:0004471; GO:0006108; GO:0051287; GO:0055114
TraesCS3B02G139600.1	1	***	tr|A0A061GNC5|A0A061GNC5_THECC	RING/U-box superfamily protein	PF13639: Ring finger domain	IPR001841: Zinc finger, RING-type; IPR013083: Zinc finger, RING/FYVE/PHD-type	GO:0005515 MF: protein binding;GO:0008270 MF: zinc ion binding	G	PF13639	IPR001841; IPR013083	GO:0005515; GO:0008270
TraesCS2A02G155200.1	1	*-*	tr|M8C0J9|M8C0J9_AEGTA	Glucan endo-1,3-beta-glucosidase 3	PF07983: X8 domain	IPR012946: X8 domain		G	PF07983	IPR012946
TraesCS7D02G468500.1	1	*-*	tr|W9RY64|W9RY64_9ROSA	Ethylene-responsive transcription factor		IPR001471: AP2/ERF domain; IPR016177: DNA-binding domain	GO:0003677 MF: DNA binding;GO:0003700 MF: transcription factor activity, sequence-specific DNA binding;GO:0006355 BP: regulation of transcription, DNA-templated	G		IPR001471; IPR016177	GO:0003677; GO:0003700; GO:0006355
TraesCS3B02G137200.1	0	***	tr|C6L7Y7|C6L7Y7_HORBU	F-box protein		IPR032675: Leucine-rich repeat domain, L domain-like		TE?		IPR032675
TraesCS2B02G302300.1	1	***	tr|A0A1E5VPI5|A0A1E5VPI5_9POAL	RecQ-mediated genome instability protein 1	PF08585: RecQ mediated genome instability protein	IPR013894: RecQ mediated genome instability protein, N-terminal; IPR033472: RecQ mediated genome instability protein, DUF1767		G	PF08585	IPR013894; IPR033472
TraesCS4B02G008900.1	1	***	tr|B9SCV0|B9SCV0_RICCO	40S ribosomal protein S25, putative	PF03297: S25 ribosomal protein	IPR004977: Ribosomal protein S25; IPR011991: Winged helix-turn-helix DNA-binding domain		G	PF03297	IPR004977; IPR011991
TraesCS5A02G445200.1	0	***	tr|A0A0K9P0E3|A0A0K9P0E3_ZOSMR	BAH-PHD domain-containing protein	PF01426: BAH domain; PF00628: PHD-finger	IPR001025: Bromo adjacent homology (BAH) domain; IPR001965: Zinc finger, PHD-type; IPR011011: Zinc finger, FYVE/PHD-type; IPR013083: Zinc finger, RING/FYVE/PHD-type; IPR019786: Zinc finger, PHD-type, conserved site; IPR019787: Zinc finger, PHD-finger	GO:0003682 MF: chromatin binding;GO:0005515 MF: protein binding;GO:0008270 MF: zinc ion binding	G	PF01426; PF00628	IPR001025; IPR001965; IPR011011; IPR013083; IPR019786; IPR019787	GO:0003682; GO:0005515; GO:0008270
TraesCS7A02G020500.1	1	***	tr|A0A1D6BXL7|A0A1D6BXL7_WHEAT	Ferredoxin--NADP reductase	PF00175: Oxidoreductase NAD-binding domain	IPR001433: Oxidoreductase FAD/NAD(P)-binding; IPR001709: Flavoprotein pyridine nucleotide cytochrome reductase; IPR015701: Ferredoxin--NADP reductase; IPR017927: Ferredoxin reductase-type FAD-binding domain; IPR017938: Riboflavin synthase-like beta-barrel	GO:0016491 MF: oxidoreductase activity;GO:0055114 BP: oxidation-reduction process	G	PF00175	IPR001433; IPR001709; IPR015701; IPR017927; IPR017938	GO:0016491; GO:0055114
TraesCS2B02G229900.2	0	***	AT1G11170.7	lysine ketoglutarate reductase trans-splicing-like protein (DUF707)	PF05212: Protein of unknown function (DUF707)	IPR007877: Protein of unknown function DUF707		G	PF05212	IPR007877
TraesCS2B02G229900.1	1	***	AT1G11170.7	lysine ketoglutarate reductase trans-splicing-like protein (DUF707)	PF05212: Protein of unknown function (DUF707)	IPR007877: Protein of unknown function DUF707		G	PF05212	IPR007877
TraesCS2B02G334400.1	1	***	AT4G08510.2	mediator of RNA polymerase II transcription subunit-like protein				G
TraesCS5D02G075800.1	1	***	AT2G15000.7	caspase-6 protein				G
TraesCS5D02G385600.1	1	***	tr|Q1I184|Q1I184_PEA	WD-40 repeat protein	PF12265: Histone-binding protein RBBP4 or subunit C of CAF1 complex; PF00400: WD domain, G-beta repeat	IPR001680: WD40 repeat; IPR015943: WD40/YVTN repeat-like-containing domain; IPR017986: WD40-repeat-containing domain; IPR019775: WD40 repeat, conserved site; IPR020472: G-protein beta WD-40 repeat; IPR022052: Histone-binding protein RBBP4, N-terminal	GO:0005515 MF: protein binding	G	PF12265; PF00400	IPR001680; IPR015943; IPR017986; IPR019775; IPR020472; IPR022052	GO:0005515
TraesCS6A02G340400.1	1	***	tr|N1QT53|N1QT53_AEGTA	GPI ethanolamine phosphate transferase 2	PF01663: Type I phosphodiesterase / nucleotide pyrophosphatase	IPR002591: Type I phosphodiesterase/nucleotide pyrophosphatase/phosphate transferase; IPR017849: Alkaline phosphatase-like, alpha/beta/alpha; IPR017850: Alkaline-phosphatase-like, core domain	GO:0003824 MF: catalytic activity;GO:0008152 BP: metabolic process	G	PF01663	IPR002591; IPR017849; IPR017850	GO:0003824; GO:0008152
TraesCS2B02G201200.1	1	***	tr|M8C1K3|M8C1K3_AEGTA	Mitochondrial import inner membrane translocase subunit Tim17	PF02466: Tim17/Tim22/Tim23/Pmp24 family	IPR003397: Mitochondrial inner membrane translocase subunit Tim17/Tim22/Tim23/peroxisomal protein PMP24		G	PF02466	IPR003397
TraesCS6B02G125600.2	0	***	AT4G39170.1	Sec14p-like phosphatidylinositol transfer family protein	PF00650: CRAL/TRIO domain	IPR001251: CRAL-TRIO lipid binding domain		G	PF00650	IPR001251
TraesCS6A02G150000.1	1	***	tr|A0A061GQ98|A0A061GQ98_THECC	Fatty acid hydroxylase superfamily	PF04116: Fatty acid hydroxylase superfamily; PF12076: WAX2 C-terminal domain	IPR006694: Fatty acid hydroxylase; IPR016040: NAD(P)-binding domain; IPR021940: Uncharacterised domain Wax2, C-terminal	GO:0005506 MF: iron ion binding;GO:0008610 BP: lipid biosynthetic process;GO:0016491 MF: oxidoreductase activity;GO:0055114 BP: oxidation-reduction process	G	PF04116; PF12076	IPR006694; IPR016040; IPR021940	GO:0005506; GO:0008610; GO:0016491; GO:0055114
TraesCS1A02G049600.2	1	***	tr|A0A0K9NPK2|A0A0K9NPK2_ZOSMR	ABC transporter G family member	PF00005: ABC transporter; PF01061: ABC-2 type transporter	IPR003439: ABC transporter-like; IPR003593: AAA+ ATPase domain; IPR013525: ABC-2 type transporter; IPR017871: ABC transporter, conserved site; IPR027417: P-loop containing nucleoside triphosphate hydrolase	GO:0005524 MF: ATP binding;GO:0016020 CC: membrane;GO:0016887 MF: ATPase activity	G	PF00005; PF01061	IPR003439; IPR003593; IPR013525; IPR017871; IPR027417	GO:0005524; GO:0016020; GO:0016887
TraesCS1A02G049600.1	0	***	tr|A0A0K9NPK2|A0A0K9NPK2_ZOSMR	ABC transporter G family member	PF00005: ABC transporter; PF01061: ABC-2 type transporter	IPR003439: ABC transporter-like; IPR003593: AAA+ ATPase domain; IPR013525: ABC-2 type transporter; IPR017871: ABC transporter, conserved site; IPR027417: P-loop containing nucleoside triphosphate hydrolase	GO:0005524 MF: ATP binding;GO:0016020 CC: membrane;GO:0016887 MF: ATPase activity	G	PF00005; PF01061	IPR003439; IPR003593; IPR013525; IPR017871; IPR027417	GO:0005524; GO:0016020; GO:0016887
TraesCS7A02G291000.1	1	***	AT5G38660.1	acclimation of photosynthesis to environment	PF11016: Protein of unknown function (DUF2854)	IPR021275: Protein of unknown function DUF2854		G	PF11016	IPR021275
TraesCS5D02G006000.1	1	***	tr|G7KGB6|G7KGB6_MEDTR	Ubiquitin-conjugating enzyme E2	PF00179: Ubiquitin-conjugating enzyme	IPR000608: Ubiquitin-conjugating enzyme E2; IPR016135: Ubiquitin-conjugating enzyme/RWD-like		G	PF00179	IPR000608; IPR016135
TraesCS6B02G235000.1	1	***	tr|E2JAU9|E2JAU9_IPOPE	Isopropylmalate dehydrogenase	PF00180: Isocitrate/isopropylmalate dehydrogenase	IPR004434: Isocitrate dehydrogenase NAD-dependent; IPR019818: Isocitrate/isopropylmalate dehydrogenase, conserved site; IPR024084: Isopropylmalate dehydrogenase-like domain	GO:0000287 MF: magnesium ion binding;GO:0004449 MF: isocitrate dehydrogenase (NAD+) activity;GO:0006099 BP: tricarboxylic acid cycle;GO:0016616 MF: oxidoreductase activity, acting on the CH-OH group of donors, NAD or NADP as acceptor;GO:0051287 MF: NAD binding;GO:0055114 BP: oxidation-reduction process	G	PF00180	IPR004434; IPR019818; IPR024084	GO:0000287; GO:0004449; GO:0006099; GO:0016616; GO:0051287; GO:0055114
TraesCS3A02G373900.1	1	***	tr|Q40684|Q40684_ORYSJ	Ferredoxin	PF00111: 2Fe-2S iron-sulfur cluster binding domain	IPR001041: 2Fe-2S ferredoxin-type iron-sulfur binding domain; IPR006058: 2Fe-2S ferredoxin, iron-sulphur binding site; IPR010241: Ferredoxin [2Fe-2S], plant; IPR012675: Beta-grasp domain	GO:0009055 MF: electron carrier activity;GO:0022900 BP: electron transport chain;GO:0051536 MF: iron-sulfur cluster binding;GO:0051537 MF: 2 iron, 2 sulfur cluster binding	G	PF00111	IPR001041; IPR006058; IPR010241; IPR012675	GO:0009055; GO:0022900; GO:0051536; GO:0051537
TraesCS1B02G419400.1	1	--*	AT4G12020.3	protein kinase family protein	PF00069: Protein kinase domain	IPR000719: Protein kinase domain; IPR011009: Protein kinase-like domain	GO:0004672 MF: protein kinase activity;GO:0005524 MF: ATP binding;GO:0006468 BP: protein phosphorylation	G	PF00069	IPR000719; IPR011009	GO:0004672; GO:0005524; GO:0006468
TraesCS3D02G100200.3	1	--*	sp|Q9ZDB5|SYFA_RICPR	Phenylalanine--tRNA ligase alpha subunit	PF07762: Protein of unknown function (DUF1618)	IPR011676: Domain of unknown function DUF1618		G	PF07762	IPR011676
TraesCS3D02G100200.1	0	--*	sp|B4TMK5|SOPA_SALSV	E3 ubiquitin-protein ligase SopA				G
TraesCS7B02G180300.1	1	***	tr|F4INZ9|F4INZ9_ARATH	2-oxoglutarate (2OG) and Fe(II)-dependent oxygenase superfamily protein	PF14226: non-haem dioxygenase in morphine synthesis N-terminal; PF03171: 2OG-Fe(II) oxygenase superfamily	IPR005123: Oxoglutarate/iron-dependent dioxygenase; IPR026992: Non-haem dioxygenase N-terminal domain; IPR027443: Isopenicillin N synthase-like	GO:0016491 MF: oxidoreductase activity;GO:0055114 BP: oxidation-reduction process	G	PF14226; PF03171	IPR005123; IPR026992; IPR027443	GO:0016491; GO:0055114
TraesCS6A02G194700.1	1	*-*	tr|B9RJF7|B9RJF7_RICCO	Sulfate transporter, putative	PF01740: STAS domain	IPR002645: STAS domain		G	PF01740	IPR002645
TraesCS3A02G267400.1	1	***	tr|Q1G3L2|Q1G3L2_ARATH	Polyketide cyclase / dehydrase and lipid transport protein	PF03364: Polyketide cyclase / dehydrase and lipid transport	IPR005031: Coenzyme Q-binding protein COQ10, START domain; IPR023393: START-like domain		G	PF03364	IPR005031; IPR023393
TraesCS3B02G107600.1	1	***	tr|B9RAX9|B9RAX9_RICCO	Receptor protein kinase, putative	PF08263: Leucine rich repeat N-terminal domain; PF13855: Leucine rich repeat; PF00069: Protein kinase domain	IPR000719: Protein kinase domain; IPR001611: Leucine-rich repeat; IPR003591: Leucine-rich repeat, typical subtype; IPR008271: Serine/threonine-protein kinase, active site; IPR011009: Protein kinase-like domain; IPR013210: Leucine-rich repeat-containing N-terminal, plant-type; IPR017441: Protein kinase, ATP binding site; IPR032675: Leucine-rich repeat domain, L domain-like	GO:0004672 MF: protein kinase activity;GO:0005515 MF: protein binding;GO:0005524 MF: ATP binding;GO:0006468 BP: protein phosphorylation	G	PF08263; PF13855; PF00069	IPR000719; IPR001611; IPR003591; IPR008271; IPR011009; IPR013210; IPR017441; IPR032675	GO:0004672; GO:0005515; GO:0005524; GO:0006468
TraesCS6A02G324800.1	1	***	tr|B6TH38|B6TH38_MAIZE	N-acetyltransferase	PF00583: Acetyltransferase (GNAT) family	IPR000182: GNAT domain; IPR016181: Acyl-CoA N-acyltransferase	GO:0008080 MF: N-acetyltransferase activity	G	PF00583	IPR000182; IPR016181	GO:0008080
TraesCS5D02G247100.2	0	*-*	tr|A0A103YH88|A0A103YH88_CYNCS	Cyclin-dependent kinase inhibitor	PF02234: Cyclin-dependent kinase inhibitor	IPR003175: Cyclin-dependent kinase inhibitor	GO:0004861 MF: cyclin-dependent protein serine/threonine kinase inhibitor activity;GO:0005634 CC: nucleus;GO:0007050 BP: cell cycle arrest	G	PF02234	IPR003175	GO:0004861; GO:0005634; GO:0007050
TraesCS3A02G344200.1	1	--*	tr|Q2R399|Q2R399_ORYSJ	GRF zinc finger family protein				TE?
TraesCS2B02G504700.1	1	***	tr|A0A059Q2Q7|A0A059Q2Q7_9POAL	Metacaspase	PF00656: Caspase domain			G	PF00656
TraesCS4D02G050200.1	1	***	tr|B9SNG9|B9SNG9_RICCO	Receptor protein kinase, putative	PF08263: Leucine rich repeat N-terminal domain; PF13855: Leucine rich repeat; PF07714: Protein tyrosine kinase	IPR000719: Protein kinase domain; IPR001245: Serine-threonine/tyrosine-protein kinase, catalytic domain; IPR001611: Leucine-rich repeat; IPR003591: Leucine-rich repeat, typical subtype; IPR008271: Serine/threonine-protein kinase, active site; IPR011009: Protein kinase-like domain; IPR013210: Leucine-rich repeat-containing N-terminal, plant-type; IPR017441: Protein kinase, ATP binding site; IPR032…	GO:0004672 MF: protein kinase activity;GO:0005515 MF: protein binding;GO:0005524 MF: ATP binding;GO:0006468 BP: protein phosphorylation	G	PF08263; PF13855; PF07714	IPR000719; IPR001245; IPR001611; IPR003591; IPR008271; IPR011009; IPR013210; IPR017441; IPR032675	GO:0004672; GO:0005515; GO:0005524; GO:0006468
TraesCS2D02G540900.1	1	*-*	tr|V6A6T6|V6A6T6_HORVU	ELMO domain containing protein	PF04727: ELMO/CED-12 family	IPR006816: ELMO domain		G	PF04727	IPR006816
TraesCS1D02G252400.2	0	*-*	tr|T1DBX3|T1DBX3_SILLA	Resistance to phytophthora 1 protein				G
TraesCS5D02G528300.1	1	***	tr|A0A1D5ZJV2|A0A1D5ZJV2_WHEAT	3-ketoacyl-CoA synthase	PF08392: FAE1/Type III polyketide synthase-like protein; PF08541: 3-Oxoacyl-[acyl-carrier-protein (ACP)] synthase III C terminal	IPR012392: Very-long-chain 3-ketoacyl-CoA synthase; IPR013601: FAE1/Type III polyketide synthase-like protein; IPR013747: 3-Oxoacyl-[acyl-carrier-protein (ACP)] synthase III, C-terminal; IPR016039: Thiolase-like	GO:0003824 MF: catalytic activity;GO:0006633 BP: fatty acid biosynthetic process;GO:0008152 BP: metabolic process;GO:0016020 CC: membrane;GO:0016747 MF: transferase activity, transferring acyl groups other than amino-acyl groups	G	PF08392; PF08541	IPR012392; IPR013601; IPR013747; IPR016039	GO:0003824; GO:0006633; GO:0008152; GO:0016020; GO:0016747
TraesCS5D02G445100.2	0	***	tr|A0A076L230|A0A076L230_GOSHI	Heat shock transcription factor		IPR011991: Winged helix-turn-helix DNA-binding domain		G		IPR011991
TraesCS5D02G445100.1	1	***	tr|A0A076L230|A0A076L230_GOSHI	Heat shock transcription factor	PF00447: HSF-type DNA-binding	IPR000232: Heat shock factor (HSF)-type, DNA-binding; IPR011991: Winged helix-turn-helix DNA-binding domain	GO:0003700 MF: transcription factor activity, sequence-specific DNA binding;GO:0005634 CC: nucleus;GO:0006355 BP: regulation of transcription, DNA-templated;GO:0043565 MF: sequence-specific DNA binding	G	PF00447	IPR000232; IPR011991	GO:0003700; GO:0005634; GO:0006355; GO:0043565
TraesCS4B02G045300.1	1	*-*	AT1G73885.1	AT-rich interactive domain protein				G
TraesCS7D02G279600.2	0	***	tr|G7IA73|G7IA73_MEDTR	PLATZ transcription factor family protein	PF04640: PLATZ transcription factor	IPR006734: Protein of unknown function DUF597; IPR013088: Zinc finger, NHR/GATA-type	GO:0006355 BP: regulation of transcription, DNA-templated;GO:0008270 MF: zinc ion binding	G	PF04640	IPR006734; IPR013088	GO:0006355; GO:0008270
TraesCS7D02G279600.1	1	***	tr|A0A061ETP0|A0A061ETP0_THECC	PLATZ transcription factor family protein	PF04640: PLATZ transcription factor	IPR006734: Protein of unknown function DUF597		G	PF04640	IPR006734
TraesCS3A02G155100.1	0	*-*	AT4G29100.1	basic helix-loop-helix (bHLH) DNA-binding superfamily protein		IPR011598: Myc-type, basic helix-loop-helix (bHLH) domain	GO:0046983 MF: protein dimerization activity	G		IPR011598	GO:0046983
TraesCS3A02G155100.2	1	*-*	AT4G29100.1	basic helix-loop-helix (bHLH) DNA-binding superfamily protein		IPR011598: Myc-type, basic helix-loop-helix (bHLH) domain	GO:0046983 MF: protein dimerization activity	G		IPR011598	GO:0046983
TraesCS3A02G155100.3	0	*-*	AT4G29100.1	basic helix-loop-helix (bHLH) DNA-binding superfamily protein		IPR011598: Myc-type, basic helix-loop-helix (bHLH) domain	GO:0046983 MF: protein dimerization activity	G		IPR011598	GO:0046983
TraesCS1D02G289300.3	0	***	tr|G7L3G1|G7L3G1_MEDTR	Respiratory burst oxidase-like protein	PF01794: Ferric reductase like transmembrane component; PF08022: FAD-binding domain; PF08030: Ferric reductase NAD binding domain	IPR000778: Cytochrome b245, heavy chain; IPR013112: FAD-binding 8; IPR013121: Ferric reductase, NAD binding domain; IPR013130: Ferric reductase transmembrane component-like domain; IPR017927: Ferredoxin reductase-type FAD-binding domain; IPR017938: Riboflavin synthase-like beta-barrel	GO:0016020 CC: membrane;GO:0016491 MF: oxidoreductase activity;GO:0055114 BP: oxidation-reduction process	G	PF01794; PF08022; PF08030	IPR000778; IPR013112; IPR013121; IPR013130; IPR017927; IPR017938	GO:0016020; GO:0016491; GO:0055114
TraesCS1D02G289300.2	1	***	tr|G7L3G1|G7L3G1_MEDTR	Respiratory burst oxidase-like protein	PF08414: Respiratory burst NADPH oxidase; PF13405: EF-hand domain; PF01794: Ferric reductase like transmembrane component; PF08022: FAD-binding domain; PF08030: Ferric reductase NAD binding domain	IPR000778: Cytochrome b245, heavy chain; IPR002048: EF-hand domain; IPR011992: EF-hand domain pair; IPR013112: FAD-binding 8; IPR013121: Ferric reductase, NAD binding domain; IPR013130: Ferric reductase transmembrane component-like domain; IPR013623: NADPH oxidase Respiratory burst; IPR017927: Ferredoxin reductase-type FAD-binding domain; IPR017938: Riboflavin synthase-like beta-barrel; IPR018247…	GO:0004601 MF: peroxidase activity;GO:0005509 MF: calcium ion binding;GO:0016020 CC: membrane;GO:0016491 MF: oxidoreductase activity;GO:0050664 MF: oxidoreductase activity, acting on NAD(P)H, oxygen as acceptor;GO:0055114 BP: oxidation-reduction process	G	PF08414; PF13405; PF01794; PF08022; PF08030	IPR000778; IPR002048; IPR011992; IPR013112; IPR013121; IPR013130; IPR013623; IPR017927; IPR017938; IPR018247	GO:0004601; GO:0005509; GO:0016020; GO:0016491; GO:0050664; GO:0055114
TraesCS1D02G289300.1	0	***	tr|A0A072U175|A0A072U175_MEDTR	Respiratory burst oxidase-like protein	PF08414: Respiratory burst NADPH oxidase; PF13405: EF-hand domain; PF01794: Ferric reductase like transmembrane component; PF08022: FAD-binding domain	IPR002048: EF-hand domain; IPR011992: EF-hand domain pair; IPR013112: FAD-binding 8; IPR013130: Ferric reductase transmembrane component-like domain; IPR013623: NADPH oxidase Respiratory burst; IPR018247: EF-Hand 1, calcium-binding site	GO:0004601 MF: peroxidase activity;GO:0005509 MF: calcium ion binding;GO:0016491 MF: oxidoreductase activity;GO:0050664 MF: oxidoreductase activity, acting on NAD(P)H, oxygen as acceptor;GO:0055114 BP: oxidation-reduction process	G	PF08414; PF13405; PF01794; PF08022	IPR002048; IPR011992; IPR013112; IPR013130; IPR013623; IPR018247	GO:0004601; GO:0005509; GO:0016491; GO:0050664; GO:0055114
TraesCS7D02G025000.1	1	***	tr|H6D9R4|H6D9R4_9POAL	Ribosomal protein L5		IPR022803: Ribosomal protein L5 domain		G		IPR022803
TraesCS2B02G236200.1	1	***	tr|D0U5L9|D0U5L9_AVESA	Cellulose synthase-like protein	PF03552: Cellulose synthase	IPR005150: Cellulose synthase; IPR029044: Nucleotide-diphospho-sugar transferases	GO:0016020 CC: membrane;GO:0016760 MF: cellulose synthase (UDP-forming) activity;GO:0030244 BP: cellulose biosynthetic process	G	PF03552	IPR005150; IPR029044	GO:0016020; GO:0016760; GO:0030244
TraesCS2B02G236200.2	0	***	tr|D0U5L9|D0U5L9_AVESA	Cellulose synthase-like protein	PF03552: Cellulose synthase	IPR005150: Cellulose synthase; IPR029044: Nucleotide-diphospho-sugar transferases	GO:0016020 CC: membrane;GO:0016760 MF: cellulose synthase (UDP-forming) activity;GO:0030244 BP: cellulose biosynthetic process	G	PF03552	IPR005150; IPR029044	GO:0016020; GO:0016760; GO:0030244
TraesCS3B02G474600.1	1	*-*	tr|R7W0W9|R7W0W9_AEGTA	Exostosin-1				G
TraesCS6A02G154400.1	1	***	tr|G7KWP5|G7KWP5_MEDTR	Glucan synthase-like protein	PF04652: Vta1 like; PF14288: 1,3-beta-glucan synthase subunit FKS1, domain-1; PF02364: 1,3-beta-glucan synthase component	IPR003440: Glycosyl transferase, family 48; IPR023175: Vacuolar protein sorting-associate protein Vta1/Callose synthase, N-terminal domain; IPR026899: 1,3-beta-glucan synthase subunit FKS1-like, domain-1	GO:0000148 CC: 1,3-beta-D-glucan synthase complex;GO:0003843 MF: 1,3-beta-D-glucan synthase activity;GO:0006075 BP: (1->3)-beta-D-glucan biosynthetic process;GO:0016020 CC: membrane	G	PF04652; PF14288; PF02364	IPR003440; IPR023175; IPR026899	GO:0000148; GO:0003843; GO:0006075; GO:0016020
TraesCS2A02G409500.1	1	***	tr|W5ASM0|W5ASM0_WHEAT	1,2-dihydroxy-3-keto-5-methylthiopentene dioxygenase	PF03079: ARD/ARD' family	IPR004313: Acireductone dioxygenase ARD family; IPR011051: RmlC-like cupin domain; IPR014710: RmlC-like jelly roll fold; IPR027496: 1,2-dihydroxy-3-keto-5-methylthiopentene dioxygenase, eukaryotes	GO:0010309 MF: acireductone dioxygenase [iron(II)-requiring] activity;GO:0016491 MF: oxidoreductase activity;GO:0019509 BP: L-methionine salvage from methylthioadenosine;GO:0055114 BP: oxidation-reduction process	G	PF03079	IPR004313; IPR011051; IPR014710; IPR027496	GO:0010309; GO:0016491; GO:0019509; GO:0055114
TraesCS4B02G070000.1	1	***	tr|W5EB08|W5EB08_WHEAT	Protein DETOXIFICATION	PF01554: MatE	IPR002528: Multi antimicrobial extrusion protein	GO:0006855 BP: drug transmembrane transport;GO:0015238 MF: drug transmembrane transporter activity;GO:0015297 MF: antiporter activity;GO:0016020 CC: membrane;GO:0055085 BP: transmembrane transport	G	PF01554	IPR002528	GO:0006855; GO:0015238; GO:0015297; GO:0016020; GO:0055085
TraesCS2D02G316300.1	1	--*	tr|A0A0D3G0Q8|A0A0D3G0Q8_9ORYZ	Kinesin-like protein				G
TraesCS2A02G376600.2	1	***	tr|B3H4W6|B3H4W6_ARATH	E3 ubiquitin-protein ligase, putative (DUF177)	PF02620: Uncharacterized ACR, COG1399	IPR003772: Large ribosomal RNA subunit accumulation protein YceD		G	PF02620	IPR003772
TraesCS2A02G376600.1	0	***	tr|B3H4W6|B3H4W6_ARATH	E3 ubiquitin-protein ligase, putative (DUF177)	PF02620: Uncharacterized ACR, COG1399	IPR003772: Large ribosomal RNA subunit accumulation protein YceD		G	PF02620	IPR003772
TraesCS6B02G153800.1	1	***	tr|G7JFH5|G7JFH5_MEDTR	AP2-like ethylene-responsive transcription factor	PF00847: AP2 domain	IPR001471: AP2/ERF domain; IPR016177: DNA-binding domain	GO:0003677 MF: DNA binding;GO:0003700 MF: transcription factor activity, sequence-specific DNA binding;GO:0006355 BP: regulation of transcription, DNA-templated	G	PF00847	IPR001471; IPR016177	GO:0003677; GO:0003700; GO:0006355
TraesCS3B02G315400.2	0	***	tr|A0A0B2R9K4|A0A0B2R9K4_GLYSO	DNA polymerase III subunit gamma	PF13177: DNA polymerase III, delta subunit; PF12169: DNA polymerase III subunits gamma and tau domain III	IPR008921: DNA polymerase III, clamp loader complex, gamma/delta/delta subunit, C-terminal; IPR012763: DNA polymerase III, subunit gamma/ tau; IPR022754: DNA polymerase III, gamma subunit, domain III; IPR027417: P-loop containing nucleoside triphosphate hydrolase	GO:0003677 MF: DNA binding;GO:0003887 MF: DNA-directed DNA polymerase activity;GO:0005524 MF: ATP binding;GO:0006260 BP: DNA replication;GO:0009360 CC: DNA polymerase III complex	G	PF13177; PF12169	IPR008921; IPR012763; IPR022754; IPR027417	GO:0003677; GO:0003887; GO:0005524; GO:0006260; GO:0009360
TraesCS3B02G315400.3	0	***	tr|A0A0B2R9K4|A0A0B2R9K4_GLYSO	DNA polymerase III subunit gamma	PF13177: DNA polymerase III, delta subunit; PF12169: DNA polymerase III subunits gamma and tau domain III	IPR008921: DNA polymerase III, clamp loader complex, gamma/delta/delta subunit, C-terminal; IPR012763: DNA polymerase III, subunit gamma/ tau; IPR022754: DNA polymerase III, gamma subunit, domain III; IPR027417: P-loop containing nucleoside triphosphate hydrolase	GO:0003677 MF: DNA binding;GO:0003887 MF: DNA-directed DNA polymerase activity;GO:0005524 MF: ATP binding;GO:0006260 BP: DNA replication;GO:0009360 CC: DNA polymerase III complex	G	PF13177; PF12169	IPR008921; IPR012763; IPR022754; IPR027417	GO:0003677; GO:0003887; GO:0005524; GO:0006260; GO:0009360
TraesCS2A02G521500.1	1	***	tr|A0A0B0MSC8|A0A0B0MSC8_GOSAR	Transcription factor protein	PF00010: Helix-loop-helix DNA-binding domain	IPR011598: Myc-type, basic helix-loop-helix (bHLH) domain	GO:0046983 MF: protein dimerization activity	G	PF00010	IPR011598	GO:0046983
TraesCS7B02G371600.1	1	***	tr|M8B306|M8B306_AEGTA	F-box protein	PF00646: F-box domain	IPR001810: F-box domain	GO:0005515 MF: protein binding	TE?	PF00646	IPR001810	GO:0005515
TraesCS7A02G111300.1	1	***	tr|F2CTV6|F2CTV6_HORVV	Mitogen-activated protein kinase	PF00069: Protein kinase domain	IPR000719: Protein kinase domain; IPR003527: Mitogen-activated protein (MAP) kinase, conserved site; IPR008271: Serine/threonine-protein kinase, active site; IPR011009: Protein kinase-like domain; IPR017441: Protein kinase, ATP binding site	GO:0004672 MF: protein kinase activity;GO:0004707 MF: MAP kinase activity;GO:0005524 MF: ATP binding;GO:0006468 BP: protein phosphorylation	G	PF00069	IPR000719; IPR003527; IPR008271; IPR011009; IPR017441	GO:0004672; GO:0004707; GO:0005524; GO:0006468
TraesCS3D02G379800.1	1	***	tr|A0A072USK4|A0A072USK4_MEDTR	Galactose-binding protein	PF07738: Sad1 / UNC-like C-terminal	IPR008979: Galactose-binding domain-like; IPR012919: SUN domain		G	PF07738	IPR008979; IPR012919
TraesCS7D02G466500.2	1	***	tr|T1NCT0|T1NCT0_TRIUA	Thioredoxin	PF00085: Thioredoxin	IPR012336: Thioredoxin-like fold; IPR013766: Thioredoxin domain	GO:0045454 BP: cell redox homeostasis	G	PF00085	IPR012336; IPR013766	GO:0045454
TraesCS2A02G274400.1	1	***	tr|A0A1E5WI02|A0A1E5WI02_9POAL	dCTP pyrophosphatase 1	PF12643: MazG-like family	IPR009039: EAR; IPR025984: dCTP pyrophosphatase 1	GO:0047429 MF: nucleoside-triphosphate diphosphatase activity	G	PF12643	IPR009039; IPR025984	GO:0047429
TraesCS7D02G196000.1	1	*-*	tr|I7JNW9|I7JNW9_SOLTU	Ran GTPase activating protein 2	PF13516: Leucine Rich repeat	IPR001611: Leucine-rich repeat	GO:0005515 MF: protein binding	G	PF13516	IPR001611	GO:0005515
TraesCS7D02G466500.1	0	***	tr|T1NCT0|T1NCT0_TRIUA	Thioredoxin	PF00085: Thioredoxin	IPR012336: Thioredoxin-like fold; IPR013766: Thioredoxin domain	GO:0045454 BP: cell redox homeostasis	G	PF00085	IPR012336; IPR013766	GO:0045454
TraesCS3D02G193700.1	1	***	tr|B9IHK5|B9IHK5_POPTR	VQ motif-containing family protein	PF05678: VQ motif	IPR008889: VQ		G	PF05678	IPR008889
TraesCS3A02G159500.1	1	***	tr|B6T4T9|B6T4T9_MAIZE	Protein ABIL1				G
TraesCS3D02G299300.1	1	***	AT1G27690.1	lipase, putative (DUF620)	PF04788: Protein of unknown function (DUF620)	IPR006873: Protein of unknown function DUF620		G	PF04788	IPR006873
TraesCS7B02G199900.1	1	***	tr|A0A1E5V379|A0A1E5V379_9POAL	Conserved oligomeric Golgi complex subunit 3	PF04136: Sec34-like family	IPR007265: Conserved oligomeric Golgi complex, subunit 3	GO:0005801 CC: cis-Golgi network;GO:0006886 BP: intracellular protein transport;GO:0016020 CC: membrane	G	PF04136	IPR007265	GO:0005801; GO:0006886; GO:0016020
TraesCS3B02G325600.1	1	*-*	tr|A0A077SKL5|A0A077SKL5_9MAGN	Protein glycosylationmyb-like TTH transcriptional regulator	PF01764: Lipase (class 3)	IPR002921: Fungal lipase-like domain; IPR029058: Alpha/Beta hydrolase fold	GO:0006629 BP: lipid metabolic process	G	PF01764	IPR002921; IPR029058	GO:0006629
TraesCS6D02G111600.1	1	*-*	sp|P38853|KEL1_YEAST	Kelch repeat-containing protein 1	PF13426: PAS domain; PF12937: F-box-like; PF13418: Galactose oxidase, central domain; PF13415: Galactose oxidase, central domain	IPR000014: PAS domain; IPR001810: F-box domain; IPR011043: Galactose oxidase/kelch, beta-propeller; IPR015915: Kelch-type beta propeller	GO:0005515 MF: protein binding	G	PF13426; PF12937; PF13418; PF13415	IPR000014; IPR001810; IPR011043; IPR015915	GO:0005515
TraesCS6A02G199600.1	1	***	tr|A0A097PNE1|A0A097PNE1_BRADI	Iron-sulfur cluster biosynthesis family protein		IPR011991: Winged helix-turn-helix DNA-binding domain		G		IPR011991
TraesCS7A02G134700.2	1	***	tr|A0A0K9P3X9|A0A0K9P3X9_ZOSMR	Receptor-like protein kinase	PF08263: Leucine rich repeat N-terminal domain; PF13855: Leucine rich repeat; PF07714: Protein tyrosine kinase	IPR000719: Protein kinase domain; IPR001245: Serine-threonine/tyrosine-protein kinase, catalytic domain; IPR001611: Leucine-rich repeat; IPR008271: Serine/threonine-protein kinase, active site; IPR011009: Protein kinase-like domain; IPR013210: Leucine-rich repeat-containing N-terminal, plant-type; IPR017441: Protein kinase, ATP binding site; IPR032675: Leucine-rich repeat domain, L domain-like	GO:0004672 MF: protein kinase activity;GO:0005515 MF: protein binding;GO:0005524 MF: ATP binding;GO:0006468 BP: protein phosphorylation	G	PF08263; PF13855; PF07714	IPR000719; IPR001245; IPR001611; IPR008271; IPR011009; IPR013210; IPR017441; IPR032675	GO:0004672; GO:0005515; GO:0005524; GO:0006468
TraesCS5D02G053600.1	1	***	tr|Q69LG2|Q69LG2_ORYSJ	Ankyrin repeat protein family-like	PF12796: Ankyrin repeats (3 copies); PF13962: Domain of unknown function	IPR002110: Ankyrin repeat; IPR020683: Ankyrin repeat-containing domain; IPR026961: PGG domain	GO:0005515 MF: protein binding	G	PF12796; PF13962	IPR002110; IPR020683; IPR026961	GO:0005515
TraesCS3B02G000700.1	1	***	tr|Q9FXZ7|Q9FXZ7_MAIZE	1-deoxy-D-xylulose 5-phosphate reductoisomerase	PF02670: 1-deoxy-D-xylulose 5-phosphate reductoisomerase; PF08436: 1-deoxy-D-xylulose 5-phosphate reductoisomerase C-terminal; PF13288: DXP reductoisomerase C-terminal domain	IPR003821: 1-deoxy-D-xylulose 5-phosphate reductoisomerase; IPR013512: 1-deoxy-D-xylulose 5-phosphate reductoisomerase, N-terminal; IPR013644: 1-deoxy-D-xylulose 5-phosphate reductoisomerase, C-terminal; IPR016040: NAD(P)-binding domain; IPR026877: DXP reductoisomerase C-terminal domain	GO:0005515 MF: protein binding;GO:0008299 BP: isoprenoid biosynthetic process;GO:0030604 MF: 1-deoxy-D-xylulose-5-phosphate reductoisomerase activity;GO:0046872 MF: metal ion binding;GO:0055114 BP: oxidation-reduction process;GO:0070402 MF: NADPH binding	G	PF02670; PF08436; PF13288	IPR003821; IPR013512; IPR013644; IPR016040; IPR026877	GO:0005515; GO:0008299; GO:0030604; GO:0046872; GO:0055114; GO:0070402
TraesCS2A02G062600.1	1	***	tr|B6TBY5|B6TBY5_MAIZE	Proline-rich protein	PF01190: Pollen proteins Ole e I like			G	PF01190
TraesCS2A02G175200.1	1	***	tr|G7JKD3|G7JKD3_MEDTR	Transducin/WD40 repeat protein	PF08799: pre-mRNA processing factor 4 (PRP4) like; PF00400: WD domain, G-beta repeat	IPR001680: WD40 repeat; IPR014906: Pre-mRNA processing factor 4 (PRP4)-like; IPR015943: WD40/YVTN repeat-like-containing domain; IPR017986: WD40-repeat-containing domain; IPR019775: WD40 repeat, conserved site; IPR020472: G-protein beta WD-40 repeat	GO:0005515 MF: protein binding	G	PF08799; PF00400	IPR001680; IPR014906; IPR015943; IPR017986; IPR019775; IPR020472	GO:0005515
TraesCS6B02G188600.1	1	***	tr|A0A1E5VYN3|A0A1E5VYN3_9POAL	C2 and GRAM domain-containing protein	PF00168: C2 domain; PF16016: Domain of unknown function (DUF4782); PF02893: GRAM domain	IPR000008: C2 domain; IPR004182: GRAM domain; IPR031968: VASt domain	GO:0005515 MF: protein binding	G	PF00168; PF16016; PF02893	IPR000008; IPR004182; IPR031968	GO:0005515
TraesCS4A02G241100.1	1	***	tr|A0A072U9P7|A0A072U9P7_MEDTR	Histidine triad nucleotide-binding protein	PF01230: HIT domain	IPR001310: Histidine triad (HIT) protein; IPR011146: HIT-like domain; IPR019808: Histidine triad, conserved site	GO:0003824 MF: catalytic activity	G	PF01230	IPR001310; IPR011146; IPR019808	GO:0003824
TraesCS3D02G159300.2	1	***	tr|A0A1E5VBQ2|A0A1E5VBQ2_9POAL	U11/U12 small nuclear ribonucleoprotein 59 kDa protein	PF16021: Programmed cell death protein 7	IPR031974: Programmed cell death protein 7		G	PF16021	IPR031974
TraesCS1D02G060900.1	1	***	tr|A0A151RN11|A0A151RN11_CAJCA	Serine/threonine-protein kinase ATM	PF00855: PWWP domain	IPR000313: PWWP domain		G	PF00855	IPR000313
TraesCS2D02G413200.1	1	***	tr|K7VQC2|K7VQC2_MAIZE	Histone H4	PF15511: Centromere kinetochore component CENP-T histone fold	IPR001951: Histone H4; IPR009072: Histone-fold; IPR019809: Histone H4, conserved site	GO:0000786 CC: nucleosome;GO:0003677 MF: DNA binding;GO:0005634 CC: nucleus;GO:0006334 BP: nucleosome assembly;GO:0046982 MF: protein heterodimerization activity	G	PF15511	IPR001951; IPR009072; IPR019809	GO:0000786; GO:0003677; GO:0005634; GO:0006334; GO:0046982
TraesCS3B02G607500.1	1	***	tr|A0A0K9PAW8|A0A0K9PAW8_ZOSMR	Chaperone protein dnaJ	PF00226: DnaJ domain; PF11926: Domain of unknown function (DUF3444)	IPR001623: DnaJ domain; IPR024593: Domain of unknown function DUF3444		G	PF00226; PF11926	IPR001623; IPR024593
TraesCS2A02G451900.2	1	***	tr|B9SKI5|B9SKI5_RICCO	DNA replication helicase dna2, putative	PF08696: DNA replication factor Dna2; PF13086: AAA domain; PF13087: AAA domain	IPR014808: DNA replication factor Dna2, N-terminal; IPR027417: P-loop containing nucleoside triphosphate hydrolase		G	PF08696; PF13086; PF13087	IPR014808; IPR027417
TraesCS3B02G564200.2	1	--*	AT2G43410.4	RNA binding protein	PF00076: RNA recognition motif. (a.k.a. RRM, RBD, or RNP domain)	IPR000504: RNA recognition motif domain	GO:0003676 MF: nucleic acid binding	G	PF00076	IPR000504	GO:0003676
TraesCS2A02G451900.1	0	***	tr|B9SKI5|B9SKI5_RICCO	DNA replication helicase dna2, putative	PF08696: DNA replication factor Dna2; PF13086: AAA domain; PF13087: AAA domain	IPR014808: DNA replication factor Dna2, N-terminal; IPR027417: P-loop containing nucleoside triphosphate hydrolase		G	PF08696; PF13086; PF13087	IPR014808; IPR027417
TraesCS6B02G071500.1	1	***	tr|G7JBQ4|G7JBQ4_MEDTR	SPOC domain/transcription elongation factor S-II, putative	PF07500: Transcription factor S-II (TFIIS), central domain; PF07744: SPOC domain	IPR003618: Transcription elongation factor S-II, central domain; IPR012921: Spen paralogue and orthologue SPOC, C-terminal	GO:0006351 BP: transcription, DNA-templated	G	PF07500; PF07744	IPR003618; IPR012921	GO:0006351
TraesCS6B02G340300.1	1	***	tr|B6U4D1|B6U4D1_MAIZE	Metalloendoproteinase 1	PF01471: Putative peptidoglycan binding domain; PF00413: Matrixin	IPR001818: Peptidase M10, metallopeptidase; IPR002477: Peptidoglycan binding-like; IPR006026: Peptidase, metallopeptidase; IPR021190: Peptidase M10A; IPR024079: Metallopeptidase, catalytic domain	GO:0004222 MF: metalloendopeptidase activity;GO:0006508 BP: proteolysis;GO:0008237 MF: metallopeptidase activity;GO:0008270 MF: zinc ion binding;GO:0031012 CC: extracellular matrix	G	PF01471; PF00413	IPR001818; IPR002477; IPR006026; IPR021190; IPR024079	GO:0004222; GO:0006508; GO:0008237; GO:0008270; GO:0031012
TraesCS6A02G287800.1	0	***	tr|B4FWY5|B4FWY5_MAIZE	BSD domain containing protein	PF03909: BSD domain	IPR005607: BSD domain		G	PF03909	IPR005607
TraesCS4B02G186200.1	1	***	tr|Q10MM6|Q10MM6_ORYSJ	Long cell-linked locus protein, putative, expressed	PF05553: Cotton fibre expressed protein	IPR008480: Protein of unknown function DUF761, plant		G	PF05553	IPR008480
TraesCS6D02G266500.2	1	***	tr|M8AMU0|M8AMU0_TRIUA	Enhancer of mRNA-decapping protein 4	PF16529: WD40 region of Ge1, enhancer of mRNA-decapping protein	IPR001680: WD40 repeat; IPR015943: WD40/YVTN repeat-like-containing domain; IPR017986: WD40-repeat-containing domain; IPR032401: Enhancer of mRNA-decapping protein 4, WD40 repeat region	GO:0005515 MF: protein binding	G	PF16529	IPR001680; IPR015943; IPR017986; IPR032401	GO:0005515
TraesCS7A02G322600.2	0	--*	sp|Q4L530|HTRAL_STAHJ	Serine protease HtrA-like	PF13180: PDZ domain	IPR001478: PDZ domain; IPR009003: Peptidase S1, PA clan	GO:0005515 MF: protein binding	G	PF13180	IPR001478; IPR009003	GO:0005515
TraesCS5D02G168700.2	1	--*	tr|A0A072UGB1|A0A072UGB1_MEDTR	tRNA-specific adenosine deaminase	PF00383: Cytidine and deoxycytidylate deaminase zinc-binding region	IPR002125: Cytidine and deoxycytidylate deaminases, zinc-binding; IPR016193: Cytidine deaminase-like	GO:0003824 MF: catalytic activity;GO:0008270 MF: zinc ion binding	G	PF00383	IPR002125; IPR016193	GO:0003824; GO:0008270
TraesCS5D02G168700.1	0	--*	tr|A0A072UGB1|A0A072UGB1_MEDTR	tRNA-specific adenosine deaminase	PF00383: Cytidine and deoxycytidylate deaminase zinc-binding region	IPR002125: Cytidine and deoxycytidylate deaminases, zinc-binding; IPR016193: Cytidine deaminase-like	GO:0003824 MF: catalytic activity;GO:0008270 MF: zinc ion binding	G	PF00383	IPR002125; IPR016193	GO:0003824; GO:0008270
TraesCS7A02G322600.1	1	--*	sp|Q4L530|HTRAL_STAHJ	Serine protease HtrA-like	PF13180: PDZ domain	IPR001478: PDZ domain; IPR009003: Peptidase S1, PA clan	GO:0005515 MF: protein binding	G	PF13180	IPR001478; IPR009003	GO:0005515
TraesCS3B02G291700.1	1	*-*	tr|B3IWJ1|B3IWJ1_9BRAS	Methyltransferase	PF08241: Methyltransferase domain; PF13489: Methyltransferase domain	IPR013216: Methyltransferase type 11; IPR025771: Phosphoethanolamine N-methyltransferase; IPR029063: S-adenosyl-L-methionine-dependent methyltransferase	GO:0000234 MF: phosphoethanolamine N-methyltransferase activity;GO:0006656 BP: phosphatidylcholine biosynthetic process;GO:0008152 BP: metabolic process;GO:0008168 MF: methyltransferase activity	G	PF08241; PF13489	IPR013216; IPR025771; IPR029063	GO:0000234; GO:0006656; GO:0008152; GO:0008168
TraesCS1A02G333900.1	1	***	tr|A0A1D5S0A4|A0A1D5S0A4_WHEAT	Tubby-like F-box protein	PF00646: F-box domain; PF01167: Tub family	IPR000007: Tubby, C-terminal; IPR001810: F-box domain; IPR018066: Tubby, C-terminal, conserved site; IPR025659: Tubby C-terminal-like domain	GO:0005515 MF: protein binding	TE?	PF00646; PF01167	IPR000007; IPR001810; IPR018066; IPR025659	GO:0005515
TraesCS2D02G346400.1	1	***	tr|M8CL94|M8CL94_AEGTA	Ribosome-recycling factor	PF01765: Ribosome recycling factor	IPR023584: Ribosome recycling factor domain		G	PF01765	IPR023584
TraesCS6B02G222600.1	1	--*	AT5G22220.3	E2F transcription factor 1				G
TraesCS5D02G080800.1	1	***	tr|M7Z0D4|M7Z0D4_TRIUA	Protein misato-like protein 1	PF10644: Misato Segment II tubulin-like domain; PF14881: Tubulin domain	IPR003008: Tubulin/FtsZ, GTPase domain; IPR019605: Misato Segment II tubulin-like domain; IPR029209: DML1/Misato, tubulin domain	GO:0003924 MF: GTPase activity	G	PF10644; PF14881	IPR003008; IPR019605; IPR029209	GO:0003924
TraesCS2B02G323900.1	1	***	tr|W5BD32|W5BD32_WHEAT	Pectinesterase	PF01095: Pectinesterase	IPR000070: Pectinesterase, catalytic; IPR006311: Twin-arginine translocation pathway, signal sequence; IPR006501: Pectinesterase inhibitor domain; IPR011050: Pectin lyase fold/virulence factor; IPR012334: Pectin lyase fold; IPR033131: Pectinesterase, Asp active site	GO:0004857 MF: enzyme inhibitor activity;GO:0005618 CC: cell wall;GO:0030599 MF: pectinesterase activity;GO:0042545 BP: cell wall modification	G	PF01095	IPR000070; IPR006311; IPR006501; IPR011050; IPR012334; IPR033131	GO:0004857; GO:0005618; GO:0030599; GO:0042545
TraesCS6B02G222600.2	0	--*	sp|Q9D0K1|PEX13_MOUSE	Peroxisomal membrane protein PEX13				G
TraesCS3B02G237200.1	1	***	tr|B9S5X5|B9S5X5_RICCO	3-hydroxyisobutyrate dehydrogenase, putative	PF03446: NAD binding domain of 6-phosphogluconate dehydrogenase; PF14833: NAD-binding of NADP-dependent 3-hydroxyisobutyrate dehydrogenase	IPR002204: 3-hydroxyisobutyrate dehydrogenase-related, conserved site; IPR006115: 6-phosphogluconate dehydrogenase, NADP-binding; IPR008927: 6-phosphogluconate dehydrogenase C-terminal domain-like; IPR013328: 6-phosphogluconate dehydrogenase, domain 2; IPR015815: 3-hydroxyisobutyrate dehydrogenase-related; IPR016040: NAD(P)-binding domain; IPR029154: 3-hydroxyisobutyrate dehydrogenase, NAD-bindin…	GO:0004616 MF: phosphogluconate dehydrogenase (decarboxylating) activity;GO:0016491 MF: oxidoreductase activity;GO:0051287 MF: NAD binding;GO:0055114 BP: oxidation-reduction process	G	PF03446; PF14833	IPR002204; IPR006115; IPR008927; IPR013328; IPR015815; IPR016040; IPR029154	GO:0004616; GO:0016491; GO:0051287; GO:0055114
TraesCS4A02G135900.1	1	***	tr|W5DZ22|W5DZ22_WHEAT	Reticulon-like protein	PF02453: Reticulon	IPR003388: Reticulon		G	PF02453	IPR003388
TraesCS5B02G461300.1	1	***	tr|B3TLT9|B3TLT9_ELAGV	60S ribosomal protein L7	PF08079: Ribosomal L30 N-terminal domain; PF00327: Ribosomal protein L30p/L7e	IPR005998: Ribosomal protein L7, eukaryotic; IPR012988: Ribosomal protein L30, N-terminal; IPR016082: Ribosomal protein L30, ferredoxin-like fold domain; IPR018038: Ribosomal protein L30, conserved site		G	PF08079; PF00327	IPR005998; IPR012988; IPR016082; IPR018038
TraesCS2A02G328900.1	1	***	tr|A0A1E5UUB7|A0A1E5UUB7_9POAL	Protein PHLOEM PROTEIN 2-LIKE A10				G
TraesCS4A02G135900.2	0	***	tr|M0V869|M0V869_HORVV	Reticulon-like protein	PF02453: Reticulon	IPR003388: Reticulon		G	PF02453	IPR003388
TraesCS6D02G072600.1	1	***	tr|B9HRF0|B9HRF0_POPTR	NADP dependent sorbitol 6-phosphate dehydrogenase family protein	PF00248: Aldo/keto reductase family	IPR018170: Aldo/keto reductase, conserved site; IPR020471: Aldo/keto reductase; IPR023210: NADP-dependent oxidoreductase domain	GO:0016491 MF: oxidoreductase activity;GO:0055114 BP: oxidation-reduction process	G	PF00248	IPR018170; IPR020471; IPR023210	GO:0016491; GO:0055114
TraesCS1D02G277100.1	1	*-*	tr|A0A103YIA8|A0A103YIA8_CYNCS	DNA glycosylase	PF15628: RRM in Demeter	IPR003265: HhH-GPD domain; IPR003651: Endonuclease III-like, iron-sulphur cluster loop motif; IPR011257: DNA glycosylase; IPR023170: Helix-turn-helix, base-excision DNA repair, C-terminal; IPR028925: Demeter, RRM-fold domain	GO:0003824 MF: catalytic activity;GO:0006281 BP: DNA repair;GO:0006284 BP: base-excision repair;GO:0051539 MF: 4 iron, 4 sulfur cluster binding	G	PF15628	IPR003265; IPR003651; IPR011257; IPR023170; IPR028925	GO:0003824; GO:0006281; GO:0006284; GO:0051539
TraesCS1D02G277100.2	0	*-*	tr|A0A103YIA8|A0A103YIA8_CYNCS	DNA glycosylase	PF15628: RRM in Demeter	IPR003265: HhH-GPD domain; IPR003651: Endonuclease III-like, iron-sulphur cluster loop motif; IPR011257: DNA glycosylase; IPR023170: Helix-turn-helix, base-excision DNA repair, C-terminal; IPR028925: Demeter, RRM-fold domain	GO:0003824 MF: catalytic activity;GO:0006281 BP: DNA repair;GO:0006284 BP: base-excision repair;GO:0051539 MF: 4 iron, 4 sulfur cluster binding	G	PF15628	IPR003265; IPR003651; IPR011257; IPR023170; IPR028925	GO:0003824; GO:0006281; GO:0006284; GO:0051539
TraesCS1D02G277100.3	0	*-*	tr|A0A103YIA8|A0A103YIA8_CYNCS	DNA glycosylase	PF15628: RRM in Demeter	IPR003265: HhH-GPD domain; IPR003651: Endonuclease III-like, iron-sulphur cluster loop motif; IPR011257: DNA glycosylase; IPR023170: Helix-turn-helix, base-excision DNA repair, C-terminal; IPR028925: Demeter, RRM-fold domain	GO:0003824 MF: catalytic activity;GO:0006281 BP: DNA repair;GO:0006284 BP: base-excision repair;GO:0051539 MF: 4 iron, 4 sulfur cluster binding	G	PF15628	IPR003265; IPR003651; IPR011257; IPR023170; IPR028925	GO:0003824; GO:0006281; GO:0006284; GO:0051539
TraesCS3B02G591300.1	1	***	tr|D8LAQ6|D8LAQ6_HORVV	Eukaryotic translation initiation factor 4E	PF01652: Eukaryotic initiation factor 4E	IPR001040: Translation Initiation factor eIF- 4e; IPR019770: Eukaryotic translation initiation factor 4E (eIF-4E), conserved site; IPR023398: Translation Initiation factor eIF- 4e-like	GO:0003723 MF: RNA binding;GO:0003743 MF: translation initiation factor activity;GO:0005737 CC: cytoplasm;GO:0006413 BP: translational initiation	G	PF01652	IPR001040; IPR019770; IPR023398	GO:0003723; GO:0003743; GO:0005737; GO:0006413
TraesCS7A02G204300.1	1	*-*	tr|A0A059ZXJ2|A0A059ZXJ2_BOENI	NAC domain-containing protein	PF02365: No apical meristem (NAM) protein	IPR003441: NAC domain	GO:0003677 MF: DNA binding;GO:0006355 BP: regulation of transcription, DNA-templated	G	PF02365	IPR003441	GO:0003677; GO:0006355
TraesCS3B02G418800.1	1	***	tr|A0A199VFI0|A0A199VFI0_ANACO	F-box protein	PF00646: F-box domain	IPR001810: F-box domain; IPR011044: Quinoprotein amine dehydrogenase, beta chain-like; IPR015943: WD40/YVTN repeat-like-containing domain	GO:0005515 MF: protein binding	TE?	PF00646	IPR001810; IPR011044; IPR015943	GO:0005515
TraesCS5D02G382600.1	1	***	tr|C4J9B4|C4J9B4_MAIZE	WRKY transcription factor	PF10533: Plant zinc cluster domain; PF03106: WRKY DNA -binding domain	IPR003657: WRKY domain; IPR018872: Zn-cluster domain	GO:0003700 MF: transcription factor activity, sequence-specific DNA binding;GO:0006355 BP: regulation of transcription, DNA-templated;GO:0043565 MF: sequence-specific DNA binding	G	PF10533; PF03106	IPR003657; IPR018872	GO:0003700; GO:0006355; GO:0043565
TraesCS7B02G190600.1	1	***	tr|G7LAQ6|G7LAQ6_MEDTR	Mannan endo-1,4-beta-mannosidase-like protein	PF00150: Cellulase (glycosyl hydrolase family 5)	IPR001547: Glycoside hydrolase, family 5; IPR017853: Glycoside hydrolase superfamily	GO:0004553 MF: hydrolase activity, hydrolyzing O-glycosyl compounds;GO:0005975 BP: carbohydrate metabolic process	G	PF00150	IPR001547; IPR017853	GO:0004553; GO:0005975
TraesCS5B02G040600.1	1	***	tr|A0A1J3G1X5|A0A1J3G1X5_NOCCA	Protein ROOT PRIMORDIUM DEFECTIVE 1	PF11955: Plant organelle RNA recognition domain	IPR021099: Plant organelle RNA recognition domain		G	PF11955	IPR021099
TraesCS1D02G095900.1	1	***	tr|M8C1J6|M8C1J6_AEGTA	F-box protein	PF00646: F-box domain	IPR001810: F-box domain; IPR011047: Quinoprotein alcohol dehydrogenase-like superfamily; IPR015943: WD40/YVTN repeat-like-containing domain	GO:0005515 MF: protein binding	TE?	PF00646	IPR001810; IPR011047; IPR015943	GO:0005515
TraesCS5D02G078900.1	1	*-*	AT1G49610.1	F-box family protein	PF08387: FBD	IPR001810: F-box domain; IPR006566: FBD domain; IPR032675: Leucine-rich repeat domain, L domain-like	GO:0005515 MF: protein binding	TE?	PF08387	IPR001810; IPR006566; IPR032675	GO:0005515
TraesCS3B02G199400.1	1	***	tr|A0A061GGS8|A0A061GGS8_THECC	Stigma-specific Stig1 family protein, putative	PF04885: Stigma-specific protein, Stig1	IPR006969: Stigma-specific protein Stig1		G	PF04885	IPR006969
TraesCS7A02G206900.4	0	*-*	tr|A0A0B0PUI2|A0A0B0PUI2_GOSAR	Carbon catabolite repressor 4-like protein	PF03372: Endonuclease/Exonuclease/phosphatase family	IPR005135: Endonuclease/exonuclease/phosphatase		TE?	PF03372	IPR005135
TraesCS7A02G206900.1	0	***	tr|A0A0B0P8G6|A0A0B0P8G6_GOSAR	Carbon catabolite repressor 4-like protein	PF03372: Endonuclease/Exonuclease/phosphatase family	IPR005135: Endonuclease/exonuclease/phosphatase		TE?	PF03372	IPR005135
TraesCS2B02G346300.1	1	***	tr|A0A061G4Y5|A0A061G4Y5_THECC	Zinc finger family protein		IPR013087: Zinc finger C2H2-type; IPR029060: PIN domain-like	GO:0003676 MF: nucleic acid binding	TE?		IPR013087; IPR029060	GO:0003676
TraesCS2B02G329300.1	1	***	tr|W5BFB4|W5BFB4_WHEAT	Histone H2B	PF00125: Core histone H2A/H2B/H3/H4	IPR000558: Histone H2B; IPR007125: Histone H2A/H2B/H3; IPR009072: Histone-fold	GO:0000786 CC: nucleosome;GO:0003677 MF: DNA binding;GO:0046982 MF: protein heterodimerization activity	G	PF00125	IPR000558; IPR007125; IPR009072	GO:0000786; GO:0003677; GO:0046982
TraesCS7A02G179500.1	1	***	tr|A0A0K9P152|A0A0K9P152_ZOSMR	2-isopropylmalate synthase	PF00682: HMGL-like	IPR000891: Pyruvate carboxyltransferase; IPR002034: Alpha-isopropylmalate/homocitrate synthase, conserved site; IPR013785: Aldolase-type TIM barrel	GO:0003824 MF: catalytic activity;GO:0019752 BP: carboxylic acid metabolic process;GO:0046912 MF: transferase activity, transferring acyl groups, acyl groups converted into alkyl on transfer	G	PF00682	IPR000891; IPR002034; IPR013785	GO:0003824; GO:0019752; GO:0046912
TraesCS2B02G379800.1	0	***	AT4G28760.2	methyl-coenzyme M reductase II subunit gamma, putative (DUF3741)	PF14383: DUF761-associated sequence motif; PF12552: Protein of unknown function (DUF3741); PF14309: Domain of unknown function (DUF4378)	IPR022212: Domain of unknown function DUF3741; IPR025486: Domain of unknown function DUF4378; IPR032795: DUF3741-associated sequence motif		G	PF14383; PF12552; PF14309	IPR022212; IPR025486; IPR032795
TraesCS3D02G507500.1	1	***	tr|I0YLE8|I0YLE8_COCSC	DNA mismatch repair protein MutL	PF13589: Histidine kinase-, DNA gyrase B-, and HSP90-like ATPase; PF01119: DNA mismatch repair protein, C-terminal domain; PF16413: DNA mismatch repair protein Mlh1 C-terminus	IPR002099: DNA mismatch repair protein family; IPR003594: Histidine kinase-like ATPase, C-terminal domain; IPR013507: DNA mismatch repair protein, C-terminal; IPR014721: Ribosomal protein S5 domain 2-type fold, subgroup; IPR014762: DNA mismatch repair, conserved site; IPR020568: Ribosomal protein S5 domain 2-type fold; IPR032189: DNA mismatch repair protein Mlh1, C-terminal	GO:0005524 MF: ATP binding;GO:0006298 BP: mismatch repair;GO:0030983 MF: mismatched DNA binding	G	PF13589; PF01119; PF16413	IPR002099; IPR003594; IPR013507; IPR014721; IPR014762; IPR020568; IPR032189	GO:0005524; GO:0006298; GO:0030983
TraesCS3D02G507500.2	0	***	tr|I0YLE8|I0YLE8_COCSC	DNA mismatch repair protein MutL	PF13589: Histidine kinase-, DNA gyrase B-, and HSP90-like ATPase; PF01119: DNA mismatch repair protein, C-terminal domain; PF16413: DNA mismatch repair protein Mlh1 C-terminus	IPR002099: DNA mismatch repair protein family; IPR003594: Histidine kinase-like ATPase, C-terminal domain; IPR013507: DNA mismatch repair protein, C-terminal; IPR014721: Ribosomal protein S5 domain 2-type fold, subgroup; IPR014762: DNA mismatch repair, conserved site; IPR020568: Ribosomal protein S5 domain 2-type fold; IPR032189: DNA mismatch repair protein Mlh1, C-terminal	GO:0005524 MF: ATP binding;GO:0006298 BP: mismatch repair;GO:0030983 MF: mismatched DNA binding	G	PF13589; PF01119; PF16413	IPR002099; IPR003594; IPR013507; IPR014721; IPR014762; IPR020568; IPR032189	GO:0005524; GO:0006298; GO:0030983
TraesCS2B02G379800.2	1	***	AT4G28760.2	methyl-coenzyme M reductase II subunit gamma, putative (DUF3741)	PF14383: DUF761-associated sequence motif; PF12552: Protein of unknown function (DUF3741); PF14309: Domain of unknown function (DUF4378)	IPR022212: Domain of unknown function DUF3741; IPR025486: Domain of unknown function DUF4378; IPR032795: DUF3741-associated sequence motif		G	PF14383; PF12552; PF14309	IPR022212; IPR025486; IPR032795
TraesCS1A02G191700.1	1	***	tr|G7IB92|G7IB92_MEDTR	Abscisic acid receptor	PF10604: Polyketide cyclase / dehydrase and lipid transport	IPR019587: Polyketide cyclase/dehydrase; IPR023393: START-like domain		G	PF10604	IPR019587; IPR023393
TraesCS7A02G307400.1	1	***	tr|D7MUB7|D7MUB7_ARALL	Kinase family protein	PF07714: Protein tyrosine kinase	IPR000719: Protein kinase domain; IPR001245: Serine-threonine/tyrosine-protein kinase, catalytic domain; IPR008271: Serine/threonine-protein kinase, active site; IPR011009: Protein kinase-like domain	GO:0004672 MF: protein kinase activity;GO:0005524 MF: ATP binding;GO:0006468 BP: protein phosphorylation	G	PF07714	IPR000719; IPR001245; IPR008271; IPR011009	GO:0004672; GO:0005524; GO:0006468
TraesCS7D02G161800.1	1	***	tr|A0A0K9PV86|A0A0K9PV86_ZOSMR	Zinc-finger protein	PF13912: C2H2-type zinc finger	IPR013087: Zinc finger C2H2-type	GO:0003676 MF: nucleic acid binding	TE?	PF13912	IPR013087	GO:0003676
TraesCS5D02G553600.1	1	*-*	tr|B9SFA0|B9SFA0_RICCO	Polyribonucleotide nucleotidyltransferase, putative	PF01138: 3' exoribonuclease family, domain 1	IPR001247: Exoribonuclease, phosphorolytic domain 1; IPR015847: Exoribonuclease, phosphorolytic domain 2; IPR020568: Ribosomal protein S5 domain 2-type fold; IPR027408: PNPase/RNase PH domain		G	PF01138	IPR001247; IPR015847; IPR020568; IPR027408
TraesCS2D02G254700.1	1	***	tr|Q8H4J8|Q8H4J8_ORYSJ	Aldo/keto reductase family-like protein	PF00248: Aldo/keto reductase family	IPR018170: Aldo/keto reductase, conserved site; IPR023210: NADP-dependent oxidoreductase domain	GO:0016491 MF: oxidoreductase activity;GO:0055114 BP: oxidation-reduction process	G	PF00248	IPR018170; IPR023210	GO:0016491; GO:0055114
TraesCS6B02G410000.1	1	***	tr|M8BRT9|M8BRT9_AEGTA	40S ribosomal protein S30	PF04758: Ribosomal protein S30	IPR006846: Ribosomal protein S30	GO:0003735 MF: structural constituent of ribosome;GO:0005622 CC: intracellular;GO:0005840 CC: ribosome;GO:0006412 BP: translation	G	PF04758	IPR006846	GO:0003735; GO:0005622; GO:0005840; GO:0006412
TraesCS2A02G267700.1	1	*-*	tr|B6UFI8|B6UFI8_MAIZE	Glycosyltransferase				G
TraesCS5D02G107600.1	1	***	tr|G7JNA1|G7JNA1_MEDTR	RING finger and CHY zinc finger protein	PF05495: CHY zinc finger; PF13639: Ring finger domain; PF14599: Zinc-ribbon	IPR001841: Zinc finger, RING-type; IPR008913: Zinc finger, CHY-type; IPR013083: Zinc finger, RING/FYVE/PHD-type; IPR017921: Zinc finger, CTCHY-type	GO:0005515 MF: protein binding;GO:0008270 MF: zinc ion binding	TE?	PF05495; PF13639; PF14599	IPR001841; IPR008913; IPR013083; IPR017921	GO:0005515; GO:0008270
TraesCS2B02G355400.1	1	***	tr|A0A060A661|A0A060A661_BOENI	NAC domain-containing protein	PF02365: No apical meristem (NAM) protein	IPR003441: NAC domain	GO:0003677 MF: DNA binding;GO:0006355 BP: regulation of transcription, DNA-templated	G	PF02365	IPR003441	GO:0003677; GO:0006355
TraesCS4A02G117500.1	0	***	tr|Q10MN7|Q10MN7_ORYSJ	Calmodulin-binding protein, putative, expressed	PF07887: Calmodulin binding protein-like	IPR012416: CALMODULIN-BINDING PROTEIN60	GO:0005516 MF: calmodulin binding;GO:0006950 BP: response to stress	G	PF07887	IPR012416	GO:0005516; GO:0006950
TraesCS5A02G167600.1	1	--*	tr|A0A0K9PLZ6|A0A0K9PLZ6_ZOSMR	Ethylene-responsive transcription factor				G
TraesCS4A02G117500.3	1	***	tr|Q10MN7|Q10MN7_ORYSJ	Calmodulin-binding protein, putative, expressed	PF07887: Calmodulin binding protein-like	IPR012416: CALMODULIN-BINDING PROTEIN60	GO:0005516 MF: calmodulin binding;GO:0006950 BP: response to stress	G	PF07887	IPR012416	GO:0005516; GO:0006950
TraesCS4A02G117500.2	0	***	tr|Q10MN7|Q10MN7_ORYSJ	Calmodulin-binding protein, putative, expressed	PF07887: Calmodulin binding protein-like	IPR012416: CALMODULIN-BINDING PROTEIN60	GO:0005516 MF: calmodulin binding;GO:0006950 BP: response to stress	G	PF07887	IPR012416	GO:0005516; GO:0006950
TraesCS5B02G373900.1	1	***	tr|A0A103XH66|A0A103XH66_CYNCS	EEIG1/EHBP1 N-terminal domain-containing protein	PF10358: N-terminal C2 in EEIG1 and EHBP1 proteins	IPR019448: EEIG1/EHBP1 N-terminal domain		G	PF10358	IPR019448
TraesCS6B02G256500.1	1	***	AT1G07090.1	LIGHT-DEPENDENT SHORT HYPOCOTYLS-like protein (DUF640)	PF04852: Protein of unknown function (DUF640)	IPR006936: ALOG domain		G	PF04852	IPR006936
TraesCS3A02G299600.1	1	--*	AT5G57380.2	Fibronectin type III domain-containing protein				G
TraesCS7A02G178300.1	1	***	tr|Q6TM44|Q6TM44_MAIZE	Germin-like protein	PF00190: Cupin	IPR001929: Germin; IPR006045: Cupin 1; IPR011051: RmlC-like cupin domain; IPR014710: RmlC-like jelly roll fold; IPR019780: Germin, manganese binding site	GO:0030145 MF: manganese ion binding;GO:0045735 MF: nutrient reservoir activity	G	PF00190	IPR001929; IPR006045; IPR011051; IPR014710; IPR019780	GO:0030145; GO:0045735
TraesCS5D02G160900.1	1	***	tr|B9SGR5|B9SGR5_RICCO	Pentatricopeptide repeat-containing protein, putative	PF13041: PPR repeat family; PF01535: PPR repeat	IPR002885: Pentatricopeptide repeat; IPR011990: Tetratricopeptide-like helical domain	GO:0005515 MF: protein binding	G	PF13041; PF01535	IPR002885; IPR011990	GO:0005515
TraesCS2A02G576500.1	1	--*	tr|A9PJN7|A9PJN7_9ROSI	Ribulose bisphosphate carboxylase small chain				G
TraesCS2A02G564700.1	1	***	AT3G25490.1	Protein kinase family protein	PF13947: Wall-associated receptor kinase galacturonan-binding; PF00069: Protein kinase domain	IPR000152: EGF-type aspartate/asparagine hydroxylation site; IPR000719: Protein kinase domain; IPR000742: EGF-like domain; IPR001881: EGF-like calcium-binding domain; IPR008271: Serine/threonine-protein kinase, active site; IPR011009: Protein kinase-like domain; IPR017441: Protein kinase, ATP binding site; IPR018097: EGF-like calcium-binding, conserved site; IPR025287: Wall-associated receptor ki…	GO:0004672 MF: protein kinase activity;GO:0005509 MF: calcium ion binding;GO:0005515 MF: protein binding;GO:0005524 MF: ATP binding;GO:0006468 BP: protein phosphorylation;GO:0030247 MF: polysaccharide binding	G	PF13947; PF00069	IPR000152; IPR000719; IPR000742; IPR001881; IPR008271; IPR011009; IPR017441; IPR018097; IPR025287	GO:0004672; GO:0005509; GO:0005515; GO:0005524; GO:0006468; GO:0030247
TraesCS6A02G299500.1	1	*-*	tr|B9S9K8|B9S9K8_RICCO	NAC domain-containing protein, putative	PF02365: No apical meristem (NAM) protein	IPR003441: NAC domain; IPR015943: WD40/YVTN repeat-like-containing domain	GO:0003677 MF: DNA binding;GO:0005515 MF: protein binding;GO:0006355 BP: regulation of transcription, DNA-templated	G	PF02365	IPR003441; IPR015943	GO:0003677; GO:0005515; GO:0006355
TraesCS6D02G029500.1	1	--*	tr|A0A0B2QVQ7|A0A0B2QVQ7_GLYSO	Zinc finger MYM-type protein 1				TE?
TraesCS2D02G000300.1	1	***	tr|B9R9K8|B9R9K8_RICCO	Protein phosphatase 2c, putative	PF00481: Protein phosphatase 2C	IPR000222: PPM-type phosphatase, divalent cation binding; IPR001932: PPM-type phosphatase domain	GO:0003824 MF: catalytic activity;GO:0043169 MF: cation binding	G	PF00481	IPR000222; IPR001932	GO:0003824; GO:0043169
TraesCS7B02G438200.1	1	***	tr|A0A061GFQ5|A0A061GFQ5_THECC	Ubiquitin system component Cue protein, putative	PF02845: CUE domain	IPR003892: Ubiquitin system component Cue; IPR009060: UBA-like	GO:0005515 MF: protein binding	G	PF02845	IPR003892; IPR009060	GO:0005515
TraesCS7A02G220400.4	1	***	tr|M7YK59|M7YK59_TRIUA	Enhancer of mRNA-decapping protein 4	PF16529: WD40 region of Ge1, enhancer of mRNA-decapping protein	IPR001680: WD40 repeat; IPR015943: WD40/YVTN repeat-like-containing domain; IPR017986: WD40-repeat-containing domain; IPR032401: Enhancer of mRNA-decapping protein 4, WD40 repeat region	GO:0005515 MF: protein binding	G	PF16529	IPR001680; IPR015943; IPR017986; IPR032401	GO:0005515
TraesCS3A02G296100.1	1	***	tr|B6UHJ5|B6UHJ5_MAIZE	Mal d 1-associated protein				G
TraesCS3A02G296100.2	0	***	tr|B6UHJ5|B6UHJ5_MAIZE	Mal d 1-associated protein				G
TraesCS6B02G180100.1	1	***	tr|G7JVF0|G7JVF0_MEDTR	Small nuclear ribonucleoprotein	PF01423: LSM domain	IPR001163: LSM domain, eukaryotic/archaea-type; IPR010920: LSM domain		G	PF01423	IPR001163; IPR010920
TraesCS1B02G253500.1	1	***	tr|C4JAX7|C4JAX7_MAIZE	UDP-sulfoquinovose synthase	PF01370: NAD dependent epimerase/dehydratase family	IPR001509: NAD-dependent epimerase/dehydratase; IPR016040: NAD(P)-binding domain	GO:0003824 MF: catalytic activity;GO:0050662 MF: coenzyme binding	G	PF01370	IPR001509; IPR016040	GO:0003824; GO:0050662
TraesCS1B02G253500.2	0	***	tr|C4JAX7|C4JAX7_MAIZE	UDP-sulfoquinovose synthase	PF01370: NAD dependent epimerase/dehydratase family	IPR001509: NAD-dependent epimerase/dehydratase; IPR016040: NAD(P)-binding domain	GO:0003824 MF: catalytic activity;GO:0050662 MF: coenzyme binding	G	PF01370	IPR001509; IPR016040	GO:0003824; GO:0050662
TraesCS7A02G220400.3	0	***	tr|M7YK59|M7YK59_TRIUA	Enhancer of mRNA-decapping protein 4	PF16529: WD40 region of Ge1, enhancer of mRNA-decapping protein	IPR001680: WD40 repeat; IPR015943: WD40/YVTN repeat-like-containing domain; IPR017986: WD40-repeat-containing domain; IPR032401: Enhancer of mRNA-decapping protein 4, WD40 repeat region	GO:0005515 MF: protein binding	G	PF16529	IPR001680; IPR015943; IPR017986; IPR032401	GO:0005515
TraesCS1B02G259300.1	0	***	tr|B9S437|B9S437_RICCO	Protein translocase secy subunit, putative	PF00344: SecY translocase	IPR002208: SecY/SEC61-alpha family; IPR023201: SecY subunit domain	GO:0015031 BP: protein transport;GO:0016020 CC: membrane	G	PF00344	IPR002208; IPR023201	GO:0015031; GO:0016020
TraesCS1B02G259300.2	1	***	tr|B9S437|B9S437_RICCO	Protein translocase secy subunit, putative	PF00344: SecY translocase	IPR002208: SecY/SEC61-alpha family; IPR023201: SecY subunit domain	GO:0015031 BP: protein transport;GO:0016020 CC: membrane	G	PF00344	IPR002208; IPR023201	GO:0015031; GO:0016020
TraesCS2D02G565600.1	1	***	tr|M7ZH46|M7ZH46_TRIUA	Bystin	PF05291: Bystin	IPR007955: Bystin		G	PF05291	IPR007955
TraesCS7B02G107400.1	1	***	tr|A0A1E5VTY3|A0A1E5VTY3_9POAL	MACPF domain-containing protein	PF01823: MAC/Perforin domain	IPR020864: Membrane attack complex component/perforin (MACPF) domain		G	PF01823	IPR020864
TraesCS3A02G404300.2	0	***	tr|A0A199W1X3|A0A199W1X3_ANACO	UPF0301 protein	PF02622: Uncharacterized ACR, COG1678	IPR003774: Protein of unknown function UPF0301		G	PF02622	IPR003774
TraesCS3B02G141400.5	0	***	tr|M8B451|M8B451_TRIUA	Transcription factor GTE11	PF00439: Bromodomain; PF17035: Bromodomain extra-terminal - transcription regulation	IPR001487: Bromodomain; IPR027353: NET domain	GO:0005515 MF: protein binding	G	PF00439; PF17035	IPR001487; IPR027353	GO:0005515
TraesCS3B02G141400.4	0	***	tr|M8B451|M8B451_TRIUA	Transcription factor GTE11	PF00439: Bromodomain; PF17035: Bromodomain extra-terminal - transcription regulation	IPR001487: Bromodomain; IPR027353: NET domain	GO:0005515 MF: protein binding	G	PF00439; PF17035	IPR001487; IPR027353	GO:0005515
TraesCS3B02G141400.7	0	***	tr|M8B451|M8B451_TRIUA	Transcription factor GTE11	PF00439: Bromodomain; PF17035: Bromodomain extra-terminal - transcription regulation	IPR001487: Bromodomain; IPR027353: NET domain	GO:0005515 MF: protein binding	G	PF00439; PF17035	IPR001487; IPR027353	GO:0005515
TraesCS3B02G141400.6	0	***	tr|M8B451|M8B451_TRIUA	Transcription factor GTE11	PF00439: Bromodomain; PF17035: Bromodomain extra-terminal - transcription regulation	IPR001487: Bromodomain; IPR027353: NET domain	GO:0005515 MF: protein binding	G	PF00439; PF17035	IPR001487; IPR027353	GO:0005515
TraesCS3B02G141400.1	0	***	tr|M7ZR98|M7ZR98_TRIUA	Transcription factor GTE9	PF00439: Bromodomain; PF17035: Bromodomain extra-terminal - transcription regulation	IPR001487: Bromodomain; IPR027353: NET domain	GO:0005515 MF: protein binding	G	PF00439; PF17035	IPR001487; IPR027353	GO:0005515
TraesCS3B02G141400.3	0	***	tr|M8B451|M8B451_TRIUA	Transcription factor GTE11	PF00439: Bromodomain; PF17035: Bromodomain extra-terminal - transcription regulation	IPR001487: Bromodomain; IPR027353: NET domain	GO:0005515 MF: protein binding	G	PF00439; PF17035	IPR001487; IPR027353	GO:0005515
TraesCS1D02G159400.9	0	***	tr|A0A1D1YHQ3|A0A1D1YHQ3_9ARAE	Vacuolar protein sorting-associated protein 52	PF04129: Vps52 / Sac2 family	IPR007258: Vps52		G	PF04129	IPR007258
TraesCS1D02G432000.1	1	--*	tr|G7KBZ0|G7KBZ0_MEDTR	Membrane-associated kinase regulator, putative				G
TraesCS4A02G016800.1	1	***	tr|C6ZRQ9|C6ZRQ9_SOYBN	Protein kinase	PF07714: Protein tyrosine kinase	IPR000719: Protein kinase domain; IPR001245: Serine-threonine/tyrosine-protein kinase, catalytic domain; IPR008271: Serine/threonine-protein kinase, active site; IPR011009: Protein kinase-like domain; IPR017441: Protein kinase, ATP binding site	GO:0004672 MF: protein kinase activity;GO:0005524 MF: ATP binding;GO:0006468 BP: protein phosphorylation	G	PF07714	IPR000719; IPR001245; IPR008271; IPR011009; IPR017441	GO:0004672; GO:0005524; GO:0006468
TraesCS7A02G440500.1	1	***	tr|A0A199W8I4|A0A199W8I4_ANACO	RNA polymerase I-specific transcription initiation factor RRN3	PF05327: RNA polymerase I specific transcription initiation factor RRN3	IPR007991: RNA polymerase I specific transcription initiation factor RRN3		G	PF05327	IPR007991
TraesCS7A02G440500.3	0	***	tr|A0A199W8I4|A0A199W8I4_ANACO	RNA polymerase I-specific transcription initiation factor RRN3	PF05327: RNA polymerase I specific transcription initiation factor RRN3	IPR007991: RNA polymerase I specific transcription initiation factor RRN3		G	PF05327	IPR007991
TraesCS7A02G440500.2	0	***	tr|A0A199W8I4|A0A199W8I4_ANACO	RNA polymerase I-specific transcription initiation factor RRN3	PF05327: RNA polymerase I specific transcription initiation factor RRN3	IPR007991: RNA polymerase I specific transcription initiation factor RRN3		G	PF05327	IPR007991
TraesCS5D02G296200.1	1	***	tr|M7Z930|M7Z930_TRIUA	60S ribosomal protein L7a	PF01248: Ribosomal protein L7Ae/L30e/S12e/Gadd45 family	IPR001921: Ribosomal protein L7A/L8; IPR004037: Ribosomal protein L7Ae conserved site; IPR004038: Ribosomal protein L7Ae/L30e/S12e/Gadd45; IPR018492: Ribosomal protein L7Ae/L8/Nhp2 family; IPR029064: 50S ribosomal protein L30e-like	GO:0030529 CC: intracellular ribonucleoprotein complex;GO:0042254 BP: ribosome biogenesis	G	PF01248	IPR001921; IPR004037; IPR004038; IPR018492; IPR029064	GO:0030529; GO:0042254
TraesCS7A02G475700.1	1	***	tr|A0A1D6BNL4|A0A1D6BNL4_WHEAT	Auxin response factor	PF02362: B3 DNA binding domain; PF06507: Auxin response factor	IPR003340: B3 DNA binding domain; IPR010525: Auxin response factor; IPR015300: DNA-binding pseudobarrel domain	GO:0003677 MF: DNA binding;GO:0005634 CC: nucleus;GO:0006355 BP: regulation of transcription, DNA-templated;GO:0009725 BP: response to hormone	G	PF02362; PF06507	IPR003340; IPR010525; IPR015300	GO:0003677; GO:0005634; GO:0006355; GO:0009725
TraesCS4A02G394300.1	1	***	tr|M7YJI1|M7YJI1_TRIUA	Acetyl-coenzyme A synthetase	PF16177: Acetyl-coenzyme A synthetase N-terminus; PF00501: AMP-binding enzyme	IPR000873: AMP-dependent synthetase/ligase; IPR020845: AMP-binding, conserved site; IPR032387: Acetyl-coenzyme A synthetase, N-terminal domain	GO:0003824 MF: catalytic activity;GO:0008152 BP: metabolic process	G	PF16177; PF00501	IPR000873; IPR020845; IPR032387	GO:0003824; GO:0008152
TraesCS4A02G394300.2	0	***	tr|N1QVP6|N1QVP6_AEGTA	Acetyl-coenzyme A synthetase	PF16177: Acetyl-coenzyme A synthetase N-terminus; PF00501: AMP-binding enzyme	IPR000873: AMP-dependent synthetase/ligase; IPR020845: AMP-binding, conserved site; IPR032387: Acetyl-coenzyme A synthetase, N-terminal domain	GO:0003824 MF: catalytic activity;GO:0008152 BP: metabolic process	G	PF16177; PF00501	IPR000873; IPR020845; IPR032387	GO:0003824; GO:0008152
TraesCS5D02G141600.1	1	*-*	AT3G06130.1	Heavy metal transport/detoxification superfamily protein	PF00403: Heavy-metal-associated domain	IPR006121: Heavy metal-associated domain, HMA; IPR015943: WD40/YVTN repeat-like-containing domain	GO:0005515 MF: protein binding;GO:0030001 BP: metal ion transport;GO:0046872 MF: metal ion binding	G	PF00403	IPR006121; IPR015943	GO:0005515; GO:0030001; GO:0046872
TraesCS4A02G432400.2	1	***	tr|B9GTK9|B9GTK9_POPTR	RNA-binding family protein	PF00076: RNA recognition motif. (a.k.a. RRM, RBD, or RNP domain)	IPR000504: RNA recognition motif domain	GO:0003676 MF: nucleic acid binding	G	PF00076	IPR000504	GO:0003676
TraesCS5B02G518900.1	1	***	tr|A0A061GLU2|A0A061GLU2_THECC	Hydroxyproline-rich glycoprotein family protein		IPR015943: WD40/YVTN repeat-like-containing domain	GO:0005515 MF: protein binding	G		IPR015943	GO:0005515
TraesCS3D02G490000.1	1	***	AT3G54460.1	SNF2 domain-containing protein / helicase domain-containing protein / F-box family protein	PF00646: F-box domain; PF00176: SNF2 family N-terminal domain; PF07496: CW-type Zinc Finger; PF00271: Helicase conserved C-terminal domain	IPR000330: SNF2-related, N-terminal domain; IPR001650: Helicase, C-terminal; IPR001810: F-box domain; IPR011124: Zinc finger, CW-type; IPR013083: Zinc finger, RING/FYVE/PHD-type; IPR014001: Helicase superfamily 1/2, ATP-binding domain; IPR017907: Zinc finger, RING-type, conserved site; IPR027417: P-loop containing nucleoside triphosphate hydrolase	GO:0005515 MF: protein binding;GO:0005524 MF: ATP binding;GO:0008270 MF: zinc ion binding	TE?	PF00646; PF00176; PF07496; PF00271	IPR000330; IPR001650; IPR001810; IPR011124; IPR013083; IPR014001; IPR017907; IPR027417	GO:0005515; GO:0005524; GO:0008270
TraesCS3D02G092900.1	0	***	tr|A0A061EBW1|A0A061EBW1_THECC	Raffinose synthase family protein	PF05691: Raffinose synthase or seed imbibition protein Sip1	IPR008811: Glycosyl hydrolases 36; IPR013785: Aldolase-type TIM barrel; IPR017853: Glycoside hydrolase superfamily	GO:0003824 MF: catalytic activity	G	PF05691	IPR008811; IPR013785; IPR017853	GO:0003824
TraesCS6D02G186000.1	1	***	tr|A0A199UPA6|A0A199UPA6_ANACO	GPI ethanolamine phosphate transferase 1	PF04987: Phosphatidylinositolglycan class N (PIG-N)	IPR017849: Alkaline phosphatase-like, alpha/beta/alpha; IPR017850: Alkaline-phosphatase-like, core domain; IPR017852: GPI ethanolamine phosphate transferase 1, C-terminal	GO:0003824 MF: catalytic activity;GO:0005789 CC: endoplasmic reticulum membrane;GO:0006506 BP: GPI anchor biosynthetic process;GO:0008152 BP: metabolic process;GO:0016740 MF: transferase activity	G	PF04987	IPR017849; IPR017850; IPR017852	GO:0003824; GO:0005789; GO:0006506; GO:0008152; GO:0016740
TraesCS3D02G092900.2	1	***	tr|A0A061EBW1|A0A061EBW1_THECC	Raffinose synthase family protein	PF05691: Raffinose synthase or seed imbibition protein Sip1	IPR008811: Glycosyl hydrolases 36; IPR013785: Aldolase-type TIM barrel; IPR017853: Glycoside hydrolase superfamily	GO:0003824 MF: catalytic activity	G	PF05691	IPR008811; IPR013785; IPR017853	GO:0003824
TraesCS3A02G385700.1	1	--*	tr|A0A1J6IT60|A0A1J6IT60_NICAT	Protein bps1, chloroplastic				G
TraesCS4D02G319300.4	1	*-*	tr|A0A1D1XNI0|A0A1D1XNI0_9ARAE	DIS3-like exonuclease 2	PF13638: PIN domain; PF17216: Rrp44-like cold shock domain; PF00773: RNB domain; PF17215: S1 domain	IPR002716: PIN domain; IPR012340: Nucleic acid-binding, OB-fold; IPR022966: Ribonuclease II/R, conserved site; IPR029060: PIN domain-like; IPR033770: Exosome complex exonuclease RRP44, S1 domain; IPR033771: Rrp44-like cold shock domain		G	PF13638; PF17216; PF00773; PF17215	IPR002716; IPR012340; IPR022966; IPR029060; IPR033770; IPR033771
TraesCS1B02G258500.1	1	--*	AT3G16210.1	F-box family protein		IPR001810: F-box domain	GO:0005515 MF: protein binding	TE?		IPR001810	GO:0005515
TraesCS6D02G212600.2	0	***	tr|A0A0K9PRG4|A0A0K9PRG4_ZOSMR	Cyclic nucleotide-gated channel	PF00520: Ion transport protein	IPR000595: Cyclic nucleotide-binding domain; IPR005821: Ion transport domain; IPR014710: RmlC-like jelly roll fold; IPR018490: Cyclic nucleotide-binding-like	GO:0005216 MF: ion channel activity;GO:0006811 BP: ion transport;GO:0016020 CC: membrane;GO:0055085 BP: transmembrane transport	G	PF00520	IPR000595; IPR005821; IPR014710; IPR018490	GO:0005216; GO:0006811; GO:0016020; GO:0055085
TraesCS4B02G065100.1	1	***	tr|Q6AVS9|Q6AVS9_ORYSJ	Mitochondrial carrier protein, expressed	PF00153: Mitochondrial carrier protein	IPR002067: Mitochondrial carrier protein; IPR018108: Mitochondrial substrate/solute carrier; IPR023395: Mitochondrial carrier domain	GO:0055085 BP: transmembrane transport	G	PF00153	IPR002067; IPR018108; IPR023395	GO:0055085
TraesCS1D02G428900.1	1	***	tr|R7W564|R7W564_AEGTA	Mitogen-activated protein kinase	PF00069: Protein kinase domain	IPR000719: Protein kinase domain; IPR003527: Mitogen-activated protein (MAP) kinase, conserved site; IPR011009: Protein kinase-like domain; IPR017441: Protein kinase, ATP binding site	GO:0004672 MF: protein kinase activity;GO:0004707 MF: MAP kinase activity;GO:0005524 MF: ATP binding;GO:0006468 BP: protein phosphorylation	G	PF00069	IPR000719; IPR003527; IPR011009; IPR017441	GO:0004672; GO:0004707; GO:0005524; GO:0006468
TraesCS4A02G105200.1	1	***	tr|A0A199VB32|A0A199VB32_ANACO	Elongator complex protein 6	PF09807: Elongation complex protein 6	IPR018627: Elongation complex protein 6	GO:0033588 CC: Elongator holoenzyme complex	G	PF09807	IPR018627	GO:0033588
TraesCS1B02G153800.1	1	***	AT1G53800.3	muscle M-line assembly protein	PF07460: NUMOD3 motif (2 copies)	IPR003611: Nuclease associated modular domain 3	GO:0003677 MF: DNA binding	G	PF07460	IPR003611	GO:0003677
TraesCS2D02G155000.1	1	--*	tr|Q2XQA3|Q2XQA3_MAIZE	Glycine rich protein 3				G
TraesCS4D02G144200.1	1	--*	sp|A6ZLH8|ERT1_YEAS7	Transcription activator of gluconeogenesis				G
TraesCS3D02G471400.2	0	***	tr|M8BYX3|M8BYX3_AEGTA	PAX-interacting protein 1	PF16770: Regulator of Ty1 transposition protein 107 BRCT domain	IPR001357: BRCT domain		TE?	PF16770	IPR001357
TraesCS3D02G471400.1	1	***	tr|M8BYX3|M8BYX3_AEGTA	PAX-interacting protein 1	PF16770: Regulator of Ty1 transposition protein 107 BRCT domain	IPR001357: BRCT domain		TE?	PF16770	IPR001357
TraesCS7B02G196800.1	0	***	tr|M8AHZ3|M8AHZ3_TRIUA	Chloroplast envelope membrane protein	PF03040: CemA family	IPR004282: Chloroplast envelope membrane protein, CemA	GO:0016021 CC: integral component of membrane	G	PF03040	IPR004282	GO:0016021
TraesCS7B02G196800.3	1	*-*	tr|A0A024B493|A0A024B493_9VIRI	envelope membrane protein, chloroplastic	PF03040: CemA family	IPR004282: Chloroplast envelope membrane protein, CemA	GO:0016021 CC: integral component of membrane	G	PF03040	IPR004282	GO:0016021
TraesCS4B02G152400.3	0	***	tr|B9SGI3|B9SGI3_RICCO	Xaa-pro aminopeptidase, putative	PF01321: Creatinase/Prolidase N-terminal domain; PF16189: Creatinase/Prolidase N-terminal domain; PF00557: Metallopeptidase family M24	IPR000587: Creatinase, N-terminal; IPR000994: Peptidase M24; IPR028980: Creatinase/Aminopeptidase P, N-terminal; IPR029149: Creatinase/Aminopeptidase P/Spt16, N-terminal	GO:0016787 MF: hydrolase activity	G	PF01321; PF16189; PF00557	IPR000587; IPR000994; IPR028980; IPR029149	GO:0016787
TraesCS7D02G061300.1	1	***	tr|A0A0K9NSA6|A0A0K9NSA6_ZOSMR	GAGA-binding transcriptional activator	PF06217: GAGA binding protein-like family	IPR010409: GAGA-binding transcriptional activator		G	PF06217	IPR010409
TraesCS1D02G133900.1	1	*-*	tr|F2DJJ6|F2DJJ6_HORVV	E3 ubiquitin-protein ligase				G
TraesCS4D02G304500.5	0	***	tr|Q8S389|Q8S389_BRANA	Calmodulin-binding transcription activator	PF03859: CG-1 domain; PF01833: IPT/TIG domain; PF00612: IQ calmodulin-binding motif	IPR000048: IQ motif, EF-hand binding site; IPR002110: Ankyrin repeat; IPR002909: IPT domain; IPR005559: CG-1 DNA-binding domain; IPR013783: Immunoglobulin-like fold; IPR014756: Immunoglobulin E-set; IPR020683: Ankyrin repeat-containing domain; IPR027417: P-loop containing nucleoside triphosphate hydrolase	GO:0003677 MF: DNA binding;GO:0005515 MF: protein binding;GO:0005634 CC: nucleus	G	PF03859; PF01833; PF00612	IPR000048; IPR002110; IPR002909; IPR005559; IPR013783; IPR014756; IPR020683; IPR027417	GO:0003677; GO:0005515; GO:0005634
TraesCS4D02G304500.6	0	***	tr|Q8S389|Q8S389_BRANA	Calmodulin-binding transcription activator	PF03859: CG-1 domain; PF01833: IPT/TIG domain; PF00612: IQ calmodulin-binding motif	IPR000048: IQ motif, EF-hand binding site; IPR002110: Ankyrin repeat; IPR002909: IPT domain; IPR005559: CG-1 DNA-binding domain; IPR013783: Immunoglobulin-like fold; IPR014756: Immunoglobulin E-set; IPR020683: Ankyrin repeat-containing domain; IPR027417: P-loop containing nucleoside triphosphate hydrolase	GO:0003677 MF: DNA binding;GO:0005515 MF: protein binding;GO:0005634 CC: nucleus	G	PF03859; PF01833; PF00612	IPR000048; IPR002110; IPR002909; IPR005559; IPR013783; IPR014756; IPR020683; IPR027417	GO:0003677; GO:0005515; GO:0005634
TraesCS7D02G507800.2	1	*-*	tr|A0A1D6C5Q0|A0A1D6C5Q0_WHEAT	Purple acid phosphatase		IPR008963: Purple acid phosphatase-like, N-terminal	GO:0003993 MF: acid phosphatase activity;GO:0046872 MF: metal ion binding	G		IPR008963	GO:0003993; GO:0046872
TraesCS3D02G541800.1	1	***	tr|A0A0K9PAW8|A0A0K9PAW8_ZOSMR	Chaperone protein dnaJ	PF00226: DnaJ domain; PF11926: Domain of unknown function (DUF3444)	IPR001623: DnaJ domain; IPR024593: Domain of unknown function DUF3444		G	PF00226; PF11926	IPR001623; IPR024593
TraesCS4D02G304500.2	0	***	tr|Q8S389|Q8S389_BRANA	Calmodulin-binding transcription activator	PF03859: CG-1 domain; PF01833: IPT/TIG domain; PF00612: IQ calmodulin-binding motif	IPR000048: IQ motif, EF-hand binding site; IPR002110: Ankyrin repeat; IPR002909: IPT domain; IPR005559: CG-1 DNA-binding domain; IPR013783: Immunoglobulin-like fold; IPR014756: Immunoglobulin E-set; IPR020683: Ankyrin repeat-containing domain; IPR027417: P-loop containing nucleoside triphosphate hydrolase	GO:0003677 MF: DNA binding;GO:0005515 MF: protein binding;GO:0005634 CC: nucleus	G	PF03859; PF01833; PF00612	IPR000048; IPR002110; IPR002909; IPR005559; IPR013783; IPR014756; IPR020683; IPR027417	GO:0003677; GO:0005515; GO:0005634
TraesCS4D02G304500.3	1	***	tr|Q8S389|Q8S389_BRANA	Calmodulin-binding transcription activator	PF03859: CG-1 domain; PF01833: IPT/TIG domain; PF00612: IQ calmodulin-binding motif	IPR000048: IQ motif, EF-hand binding site; IPR002110: Ankyrin repeat; IPR002909: IPT domain; IPR005559: CG-1 DNA-binding domain; IPR013783: Immunoglobulin-like fold; IPR014756: Immunoglobulin E-set; IPR020683: Ankyrin repeat-containing domain; IPR027417: P-loop containing nucleoside triphosphate hydrolase	GO:0003677 MF: DNA binding;GO:0005515 MF: protein binding;GO:0005634 CC: nucleus	G	PF03859; PF01833; PF00612	IPR000048; IPR002110; IPR002909; IPR005559; IPR013783; IPR014756; IPR020683; IPR027417	GO:0003677; GO:0005515; GO:0005634
TraesCS3B02G162000.2	0	***	tr|E9LZZ5|E9LZZ5_9ASPA	Flowering locus T	PF01161: Phosphatidylethanolamine-binding protein	IPR001858: Phosphatidylethanolamine-binding, conserved site; IPR008914: Phosphatidylethanolamine-binding protein		G	PF01161	IPR001858; IPR008914
TraesCS3B02G272400.2	0	*-*	AT1G53190.2	RING/U-box superfamily protein	PF13639: Ring finger domain	IPR001841: Zinc finger, RING-type; IPR013083: Zinc finger, RING/FYVE/PHD-type	GO:0005515 MF: protein binding;GO:0008270 MF: zinc ion binding	G	PF13639	IPR001841; IPR013083	GO:0005515; GO:0008270
TraesCS4A02G435000.1	1	***	tr|A0A0A0YT45|A0A0A0YT45_ALBBR	Syntaxin	PF05739: SNARE domain	IPR000727: Target SNARE coiled-coil homology domain; IPR006011: Syntaxin, N-terminal domain; IPR006012: Syntaxin/epimorphin, conserved site; IPR010989: SNARE	GO:0005484 MF: SNAP receptor activity;GO:0005515 MF: protein binding;GO:0006886 BP: intracellular protein transport;GO:0016020 CC: membrane;GO:0016192 BP: vesicle-mediated transport	G	PF05739	IPR000727; IPR006011; IPR006012; IPR010989	GO:0005484; GO:0005515; GO:0006886; GO:0016020; GO:0016192
TraesCS3B02G162000.1	1	***	tr|E9LZZ5|E9LZZ5_9ASPA	Flowering locus T	PF01161: Phosphatidylethanolamine-binding protein	IPR008914: Phosphatidylethanolamine-binding protein		G	PF01161	IPR008914
TraesCS5B02G382100.1	1	***	tr|M7ZYU9|M7ZYU9_TRIUA	E3 ubiquitin protein ligase DRIP2	PF13923: Zinc finger, C3HC4 type (RING finger)	IPR001841: Zinc finger, RING-type; IPR013083: Zinc finger, RING/FYVE/PHD-type; IPR017907: Zinc finger, RING-type, conserved site	GO:0005515 MF: protein binding;GO:0008270 MF: zinc ion binding	G	PF13923	IPR001841; IPR013083; IPR017907	GO:0005515; GO:0008270
TraesCS2D02G242600.1	1	***	tr|A0A1E5V724|A0A1E5V724_9POAL	Synaptotagmin-5	PF17047: Synaptotagmin-like mitochondrial-lipid-binding domain; PF00168: C2 domain	IPR000008: C2 domain; IPR031468: Synaptotagmin-like mitochondrial-lipid-binding domain	GO:0005515 MF: protein binding;GO:0008289 MF: lipid binding	G	PF17047; PF00168	IPR000008; IPR031468	GO:0005515; GO:0008289
TraesCS1A02G153200.1	1	***	tr|Q9ATQ9|Q9ATQ9_WHEAT	PST19				G
TraesCS7D02G494400.1	1	***	tr|B9RI09|B9RI09_RICCO	Ubiquitin, putative	PF00240: Ubiquitin family	IPR000626: Ubiquitin domain; IPR019954: Ubiquitin conserved site; IPR019956: Ubiquitin; IPR029071: Ubiquitin-related domain	GO:0005515 MF: protein binding	G	PF00240	IPR000626; IPR019954; IPR019956; IPR029071	GO:0005515
TraesCS6B02G440000.1	1	***	tr|M8CF01|M8CF01_AEGTA	B3 domain-containing protein	PF02362: B3 DNA binding domain	IPR003340: B3 DNA binding domain; IPR015300: DNA-binding pseudobarrel domain	GO:0003677 MF: DNA binding	G	PF02362	IPR003340; IPR015300	GO:0003677
TraesCS3B02G522300.2	0	***	tr|M7ZF22|M7ZF22_TRIUA	S-formylglutathione hydrolase	PF00756: Putative esterase	IPR000801: Putative esterase; IPR029058: Alpha/Beta hydrolase fold		G	PF00756	IPR000801; IPR029058
TraesCS5B02G309500.1	1	***	tr|A0A0K9NNA0|A0A0K9NNA0_ZOSMR	ATP-dependent RNA helicase	PF00270: DEAD/DEAH box helicase; PF00271: Helicase conserved C-terminal domain; PF08152: GUCT (NUC152) domain	IPR000504: RNA recognition motif domain; IPR000629: ATP-dependent RNA helicase DEAD-box, conserved site; IPR001650: Helicase, C-terminal; IPR011545: DEAD/DEAH box helicase domain; IPR012562: GUCT; IPR014001: Helicase superfamily 1/2, ATP-binding domain; IPR014014: RNA helicase, DEAD-box type, Q motif; IPR027417: P-loop containing nucleoside triphosphate hydrolase	GO:0003676 MF: nucleic acid binding;GO:0003723 MF: RNA binding;GO:0004386 MF: helicase activity;GO:0005524 MF: ATP binding;GO:0005634 CC: nucleus	TE?	PF00270; PF00271; PF08152	IPR000504; IPR000629; IPR001650; IPR011545; IPR012562; IPR014001; IPR014014; IPR027417	GO:0003676; GO:0003723; GO:0004386; GO:0005524; GO:0005634
TraesCS2A02G089300.1	1	***	tr|A0A076L230|A0A076L230_GOSHI	Heat shock transcription factor	PF00447: HSF-type DNA-binding	IPR000232: Heat shock factor (HSF)-type, DNA-binding; IPR011991: Winged helix-turn-helix DNA-binding domain	GO:0003700 MF: transcription factor activity, sequence-specific DNA binding;GO:0005634 CC: nucleus;GO:0006355 BP: regulation of transcription, DNA-templated;GO:0043565 MF: sequence-specific DNA binding	G	PF00447	IPR000232; IPR011991	GO:0003700; GO:0005634; GO:0006355; GO:0043565
TraesCS3A02G180000.2	1	***	tr|M7Z6Z3|M7Z6Z3_TRIUA	Peroxidase	PF00141: Peroxidase	IPR000823: Plant peroxidase; IPR002016: Haem peroxidase, plant/fungal/bacterial; IPR010255: Haem peroxidase; IPR019793: Peroxidases heam-ligand binding site; IPR019794: Peroxidase, active site	GO:0004601 MF: peroxidase activity;GO:0006979 BP: response to oxidative stress;GO:0020037 MF: heme binding;GO:0055114 BP: oxidation-reduction process	G	PF00141	IPR000823; IPR002016; IPR010255; IPR019793; IPR019794	GO:0004601; GO:0006979; GO:0020037; GO:0055114
TraesCS3A02G180000.1	0	***	tr|A0A1D5VL90|A0A1D5VL90_WHEAT	Peroxidase	PF00141: Peroxidase	IPR000823: Plant peroxidase; IPR002016: Haem peroxidase, plant/fungal/bacterial; IPR010255: Haem peroxidase; IPR019793: Peroxidases heam-ligand binding site; IPR019794: Peroxidase, active site	GO:0004601 MF: peroxidase activity;GO:0006979 BP: response to oxidative stress;GO:0020037 MF: heme binding;GO:0055114 BP: oxidation-reduction process	G	PF00141	IPR000823; IPR002016; IPR010255; IPR019793; IPR019794	GO:0004601; GO:0006979; GO:0020037; GO:0055114
TraesCS1B02G228800.1	1	***	tr|A0A072UPG0|A0A072UPG0_MEDTR	SBP (S-ribonuclease-binding protein) family protein	PF13920: Zinc finger, C3HC4 type (RING finger)	IPR001841: Zinc finger, RING-type; IPR017066: E3 ubiquitin-protein ligase BOI	GO:0004842 MF: ubiquitin-protein transferase activity;GO:0005515 MF: protein binding;GO:0005634 CC: nucleus;GO:0008270 MF: zinc ion binding;GO:0016567 BP: protein ubiquitination;GO:0031347 BP: regulation of defense response	G	PF13920	IPR001841; IPR017066	GO:0004842; GO:0005515; GO:0005634; GO:0008270; GO:0016567; GO:0031347
TraesCS5B02G223900.1	1	***	tr|A0A1D6S6H5|A0A1D6S6H5_WHEAT	Non-specific serine/threonine protein kinase	PF00069: Protein kinase domain; PF03822: NAF domain	IPR000719: Protein kinase domain; IPR004041: NAF domain; IPR008271: Serine/threonine-protein kinase, active site; IPR011009: Protein kinase-like domain; IPR017441: Protein kinase, ATP binding site; IPR018451: NAF/FISL domain	GO:0004672 MF: protein kinase activity;GO:0005524 MF: ATP binding;GO:0006468 BP: protein phosphorylation;GO:0007165 BP: signal transduction	G	PF00069; PF03822	IPR000719; IPR004041; IPR008271; IPR011009; IPR017441; IPR018451	GO:0004672; GO:0005524; GO:0006468; GO:0007165
TraesCS7A02G151200.2	0	--*	sp|Q9D0B5|TSTD3_MOUSE	Thiosulfate sulfurtransferase/rhodanese-like domain-containing protein 3	PF00581: Rhodanese-like domain	IPR001763: Rhodanese-like domain		G	PF00581	IPR001763
TraesCS7A02G151200.1	1	-**	sp|B6ENU6|GLPE_ALISL	Thiosulfate sulfurtransferase GlpE	PF00581: Rhodanese-like domain	IPR001763: Rhodanese-like domain		G	PF00581	IPR001763
TraesCS5D02G340500.1	1	***	AT2G27090.2	bZIP transcription factor (DUF630 and DUF632)	PF04783: Protein of unknown function (DUF630); PF04782: Protein of unknown function (DUF632)	IPR006867: Domain of unknown function DUF632; IPR006868: Domain of unknown function DUF630		G	PF04783; PF04782	IPR006867; IPR006868
TraesCS5A02G484100.1	1	***	tr|A0A1E5W0W2|A0A1E5W0W2_9POAL	Fructokinase-2	PF00294: pfkB family carbohydrate kinase	IPR002173: Carbohydrate/puine kinase, PfkB, conserved site; IPR011611: Carbohydrate kinase PfkB; IPR029056: Ribokinase-like	GO:0016773 MF: phosphotransferase activity, alcohol group as acceptor	G	PF00294	IPR002173; IPR011611; IPR029056	GO:0016773
TraesCS2D02G179400.1	0	***	tr|A0A072VES1|A0A072VES1_MEDTR	PHD finger alfin-like protein	PF12165: Alfin; PF00628: PHD-finger	IPR001965: Zinc finger, PHD-type; IPR011011: Zinc finger, FYVE/PHD-type; IPR013083: Zinc finger, RING/FYVE/PHD-type; IPR019786: Zinc finger, PHD-type, conserved site; IPR019787: Zinc finger, PHD-finger; IPR021998: Alfin	GO:0005515 MF: protein binding;GO:0006355 BP: regulation of transcription, DNA-templated;GO:0008270 MF: zinc ion binding;GO:0042393 MF: histone binding	G	PF12165; PF00628	IPR001965; IPR011011; IPR013083; IPR019786; IPR019787; IPR021998	GO:0005515; GO:0006355; GO:0008270; GO:0042393
TraesCS2D02G179400.2	1	***	tr|A0A072VES1|A0A072VES1_MEDTR	PHD finger alfin-like protein	PF12165: Alfin; PF00628: PHD-finger	IPR001965: Zinc finger, PHD-type; IPR011011: Zinc finger, FYVE/PHD-type; IPR013083: Zinc finger, RING/FYVE/PHD-type; IPR019786: Zinc finger, PHD-type, conserved site; IPR019787: Zinc finger, PHD-finger; IPR021998: Alfin	GO:0005515 MF: protein binding;GO:0006355 BP: regulation of transcription, DNA-templated;GO:0008270 MF: zinc ion binding;GO:0042393 MF: histone binding	G	PF12165; PF00628	IPR001965; IPR011011; IPR013083; IPR019786; IPR019787; IPR021998	GO:0005515; GO:0006355; GO:0008270; GO:0042393
TraesCS2B02G591500.1	1	***	tr|A0A1D5U1M2|A0A1D5U1M2_WHEAT	Auxin-responsive protein	PF02309: AUX/IAA family	IPR000270: PB1 domain; IPR033389: AUX/IAA domain	GO:0005515 MF: protein binding	G	PF02309	IPR000270; IPR033389	GO:0005515
TraesCS7D02G048400.2	1	***	tr|A0A0K9PTD8|A0A0K9PTD8_ZOSMR	Oligopeptide transporter	PF03169: OPT oligopeptide transporter protein	IPR004813: Oligopeptide transporter, OPT superfamily	GO:0055085 BP: transmembrane transport	G	PF03169	IPR004813	GO:0055085
TraesCS5B02G126000.1	1	***	tr|A0A072VQJ0|A0A072VQJ0_MEDTR	Cationic amino acid transporter	PF13520: Amino acid permease; PF13906: C-terminus of AA_permease	IPR002293: Amino acid/polyamine transporter I; IPR029485: Cationic amino acid transporter, C-terminal	GO:0003333 BP: amino acid transmembrane transport;GO:0015171 MF: amino acid transmembrane transporter activity;GO:0016020 CC: membrane	G	PF13520; PF13906	IPR002293; IPR029485	GO:0003333; GO:0015171; GO:0016020
TraesCS4D02G336200.2	0	***	tr|A4GXC8|A4GXC8_ANACO	Sugar transporter protein	PF00083: Sugar (and other) transporter	IPR003663: Sugar/inositol transporter; IPR005828: Major facilitator, sugar transporter-like; IPR005829: Sugar transporter, conserved site; IPR020846: Major facilitator superfamily domain	GO:0005215 MF: transporter activity;GO:0016020 CC: membrane;GO:0016021 CC: integral component of membrane;GO:0022857 MF: transmembrane transporter activity;GO:0022891 MF: substrate-specific transmembrane transporter activity;GO:0055085 BP: transmembrane transport	G	PF00083	IPR003663; IPR005828; IPR005829; IPR020846	GO:0005215; GO:0016020; GO:0016021; GO:0022857; GO:0022891; GO:0055085
TraesCS6D02G051300.2	0	***	tr|A0A061GJI8|A0A061GJI8_THECC	NAD(P)-binding Rossmann-fold superfamily protein		IPR016040: NAD(P)-binding domain		G		IPR016040
TraesCS3A02G449400.1	1	***	tr|E1ZSU0|E1ZSU0_CHLVA	Acetolactate synthase	PF02776: Thiamine pyrophosphate enzyme, N-terminal TPP binding domain; PF00205: Thiamine pyrophosphate enzyme, central domain; PF02775: Thiamine pyrophosphate enzyme, C-terminal TPP binding domain	IPR000399: TPP-binding enzyme, conserved site; IPR011766: Thiamine pyrophosphate enzyme, C-terminal TPP-binding; IPR012000: Thiamine pyrophosphate enzyme, central domain; IPR012001: Thiamine pyrophosphate enzyme, N-terminal TPP-binding domain; IPR029035: DHS-like NAD/FAD-binding domain; IPR029061: Thiamin diphosphate-binding fold	GO:0000287 MF: magnesium ion binding;GO:0003824 MF: catalytic activity;GO:0030976 MF: thiamine pyrophosphate binding	G	PF02776; PF00205; PF02775	IPR000399; IPR011766; IPR012000; IPR012001; IPR029035; IPR029061	GO:0000287; GO:0003824; GO:0030976
TraesCS4D02G336200.1	1	***	tr|A4GXC8|A4GXC8_ANACO	Sugar transporter protein	PF00083: Sugar (and other) transporter	IPR003663: Sugar/inositol transporter; IPR005828: Major facilitator, sugar transporter-like; IPR005829: Sugar transporter, conserved site; IPR020846: Major facilitator superfamily domain	GO:0005215 MF: transporter activity;GO:0016020 CC: membrane;GO:0016021 CC: integral component of membrane;GO:0022857 MF: transmembrane transporter activity;GO:0022891 MF: substrate-specific transmembrane transporter activity;GO:0055085 BP: transmembrane transport	G	PF00083	IPR003663; IPR005828; IPR005829; IPR020846	GO:0005215; GO:0016020; GO:0016021; GO:0022857; GO:0022891; GO:0055085
TraesCS1B02G253900.1	1	***	tr|F2Z9R4|F2Z9R4_NICBE	NAD kinase	PF01513: ATP-NAD kinase	IPR002504: NAD kinase; IPR016064: NAD kinase/diacylglycerol kinase-like domain; IPR017437: ATP-NAD kinase, PpnK-type, all-beta; IPR017438: Inorganic polyphosphate/ATP-NAD kinase, domain 1	GO:0003951 MF: NAD+ kinase activity;GO:0006741 BP: NADP biosynthetic process;GO:0008152 BP: metabolic process;GO:0019674 BP: NAD metabolic process	G	PF01513	IPR002504; IPR016064; IPR017437; IPR017438	GO:0003951; GO:0006741; GO:0008152; GO:0019674
TraesCS5A02G316300.1	1	--*	AT2G16900.7	phospholipase-like protein (PEARLI 4) family protein				G
TraesCS4D02G242900.1	1	***	tr|G7ID63|G7ID63_MEDTR	Sec14p-like phosphatidylinositol transfer family protein	PF00650: CRAL/TRIO domain	IPR001251: CRAL-TRIO lipid binding domain; IPR011074: CRAL/TRIO, N-terminal domain		G	PF00650	IPR001251; IPR011074
TraesCS6D02G270300.1	1	***	tr|A0A199V9I8|A0A199V9I8_ANACO	Protein FAM32A	PF08555: Eukaryotic family of unknown function (DUF1754)	IPR013865: Protein of unknown function DUF1754, eukaryotic		G	PF08555	IPR013865
TraesCS2B02G542300.1	1	***	tr|A0A0K9PHY5|A0A0K9PHY5_ZOSMR	Ethylene-responsive transcription factor	PF00847: AP2 domain	IPR001471: AP2/ERF domain; IPR016177: DNA-binding domain	GO:0003677 MF: DNA binding;GO:0003700 MF: transcription factor activity, sequence-specific DNA binding;GO:0006355 BP: regulation of transcription, DNA-templated	G	PF00847	IPR001471; IPR016177	GO:0003677; GO:0003700; GO:0006355
TraesCS6B02G093700.1	1	***	tr|A0A1D6AXD8|A0A1D6AXD8_WHEAT	Methyltransferase-like protein	PF05971: Protein of unknown function (DUF890)	IPR010286: Ribosomal RNA large subunit methyltransferase F-like; IPR017182: S-adenosyl-L-methionine dependent methyltransferase, Mett10D, predicted; IPR029063: S-adenosyl-L-methionine-dependent methyltransferase	GO:0008168 MF: methyltransferase activity	G	PF05971	IPR010286; IPR017182; IPR029063	GO:0008168
TraesCS1A02G066000.2	1	***	tr|M8ANL9|M8ANL9_TRIUA	Condensin-2 complex subunit G2	PF12422: Condensin II non structural maintenance of chromosomes subunit	IPR011989: Armadillo-like helical; IPR016024: Armadillo-type fold; IPR024741: Condensin-2 complex subunit G2	GO:0005488 MF: binding;GO:0005634 CC: nucleus	G	PF12422	IPR011989; IPR016024; IPR024741	GO:0005488; GO:0005634
TraesCS4B02G333900.1	1	--*	sp|Q6GHT4|NTPA_STAAR	Non-canonical purine NTP pyrophosphatase				G
TraesCS1B02G073600.1	1	***	tr|A0A061GK25|A0A061GK25_THECC	F-box family protein		IPR001810: F-box domain; IPR006553: Leucine-rich repeat, cysteine-containing subtype; IPR032675: Leucine-rich repeat domain, L domain-like	GO:0005515 MF: protein binding	TE?		IPR001810; IPR006553; IPR032675	GO:0005515
TraesCS1A02G066000.1	0	***	tr|M8ANL9|M8ANL9_TRIUA	Condensin-2 complex subunit G2	PF12422: Condensin II non structural maintenance of chromosomes subunit	IPR011989: Armadillo-like helical; IPR016024: Armadillo-type fold; IPR024741: Condensin-2 complex subunit G2	GO:0005488 MF: binding;GO:0005634 CC: nucleus	G	PF12422	IPR011989; IPR016024; IPR024741	GO:0005488; GO:0005634
TraesCS1A02G325900.2	0	***	tr|A0A1E5W0E9|A0A1E5W0E9_9POAL	MATH domain-containing protein	PF00917: MATH domain	IPR002083: MATH/TRAF domain; IPR008974: TRAF-like	GO:0005515 MF: protein binding	G	PF00917	IPR002083; IPR008974	GO:0005515
TraesCS1A02G325900.1	1	***	tr|A0A1E5W0E9|A0A1E5W0E9_9POAL	MATH domain-containing protein	PF00917: MATH domain	IPR002083: MATH/TRAF domain; IPR008974: TRAF-like	GO:0005515 MF: protein binding	G	PF00917	IPR002083; IPR008974	GO:0005515
TraesCS6B02G200400.1	1	***	tr|A0A1E5VLS4|A0A1E5VLS4_9POAL	GDSL esterase/lipase	PF00657: GDSL-like Lipase/Acylhydrolase	IPR001087: GDSL lipase/esterase; IPR013830: SGNH hydrolase-type esterase domain	GO:0016788 MF: hydrolase activity, acting on ester bonds	G	PF00657	IPR001087; IPR013830	GO:0016788
TraesCS3B02G151400.1	1	***	AT2G37370.3	centrosomal protein of 135 kDa-like protein				G
TraesCS1D02G312200.1	1	***	tr|D6MKB2|D6MKB2_9ASPA	Transcription factor	PF07716: Basic region leucine zipper	IPR004827: Basic-leucine zipper domain	GO:0003700 MF: transcription factor activity, sequence-specific DNA binding;GO:0006355 BP: regulation of transcription, DNA-templated;GO:0043565 MF: sequence-specific DNA binding	G	PF07716	IPR004827	GO:0003700; GO:0006355; GO:0043565
TraesCS3D02G124600.1	0	***	tr|A0A1D5WSE1|A0A1D5WSE1_WHEAT	Ubiquitinyl hydrolase 1	PF02148: Zn-finger in ubiquitin-hydrolases and other protein; PF00443: Ubiquitin carboxyl-terminal hydrolase; PF00627: UBA/TS-N domain	IPR001394: Peptidase C19, ubiquitin carboxyl-terminal hydrolase; IPR001607: Zinc finger, UBP-type; IPR009060: UBA-like; IPR013083: Zinc finger, RING/FYVE/PHD-type; IPR015940: Ubiquitin-associated domain; IPR016652: Ubiquitinyl hydrolase; IPR018200: Ubiquitin specific protease, conserved site; IPR028889: Ubiquitin specific protease domain	GO:0004843 MF: thiol-dependent ubiquitin-specific protease activity;GO:0005515 MF: protein binding;GO:0006511 BP: ubiquitin-dependent protein catabolic process;GO:0008270 MF: zinc ion binding;GO:0016579 BP: protein deubiquitination;GO:0036459 MF: thiol-dependent ubiquitinyl hydrolase activity	G	PF02148; PF00443; PF00627	IPR001394; IPR001607; IPR009060; IPR013083; IPR015940; IPR016652; IPR018200; IPR028889	GO:0004843; GO:0005515; GO:0006511; GO:0008270; GO:0016579; GO:0036459
TraesCS3D02G124600.2	0	***	tr|A0A1D5WSE2|A0A1D5WSE2_WHEAT	Ubiquitinyl hydrolase 1	PF02148: Zn-finger in ubiquitin-hydrolases and other protein; PF00443: Ubiquitin carboxyl-terminal hydrolase; PF00627: UBA/TS-N domain	IPR001394: Peptidase C19, ubiquitin carboxyl-terminal hydrolase; IPR001607: Zinc finger, UBP-type; IPR009060: UBA-like; IPR013083: Zinc finger, RING/FYVE/PHD-type; IPR015940: Ubiquitin-associated domain; IPR016652: Ubiquitinyl hydrolase; IPR018200: Ubiquitin specific protease, conserved site; IPR028889: Ubiquitin specific protease domain	GO:0004843 MF: thiol-dependent ubiquitin-specific protease activity;GO:0005515 MF: protein binding;GO:0006511 BP: ubiquitin-dependent protein catabolic process;GO:0008270 MF: zinc ion binding;GO:0016579 BP: protein deubiquitination;GO:0036459 MF: thiol-dependent ubiquitinyl hydrolase activity	G	PF02148; PF00443; PF00627	IPR001394; IPR001607; IPR009060; IPR013083; IPR015940; IPR016652; IPR018200; IPR028889	GO:0004843; GO:0005515; GO:0006511; GO:0008270; GO:0016579; GO:0036459
TraesCS3D02G124600.3	1	***	tr|A0A1D5WSE4|A0A1D5WSE4_WHEAT	Ubiquitinyl hydrolase 1	PF02148: Zn-finger in ubiquitin-hydrolases and other protein; PF00443: Ubiquitin carboxyl-terminal hydrolase; PF00627: UBA/TS-N domain	IPR001394: Peptidase C19, ubiquitin carboxyl-terminal hydrolase; IPR001607: Zinc finger, UBP-type; IPR009060: UBA-like; IPR013083: Zinc finger, RING/FYVE/PHD-type; IPR015940: Ubiquitin-associated domain; IPR016652: Ubiquitinyl hydrolase; IPR018200: Ubiquitin specific protease, conserved site; IPR028889: Ubiquitin specific protease domain	GO:0004843 MF: thiol-dependent ubiquitin-specific protease activity;GO:0005515 MF: protein binding;GO:0006511 BP: ubiquitin-dependent protein catabolic process;GO:0008270 MF: zinc ion binding;GO:0016579 BP: protein deubiquitination;GO:0036459 MF: thiol-dependent ubiquitinyl hydrolase activity	G	PF02148; PF00443; PF00627	IPR001394; IPR001607; IPR009060; IPR013083; IPR015940; IPR016652; IPR018200; IPR028889	GO:0004843; GO:0005515; GO:0006511; GO:0008270; GO:0016579; GO:0036459
TraesCS2B02G012100.2	0	***	tr|G7ILW5|G7ILW5_MEDTR	ABC transporter B family-like protein	PF00664: ABC transporter transmembrane region; PF00005: ABC transporter	IPR003439: ABC transporter-like; IPR003593: AAA+ ATPase domain; IPR011527: ABC transporter type 1, transmembrane domain; IPR017871: ABC transporter, conserved site; IPR027417: P-loop containing nucleoside triphosphate hydrolase	GO:0005524 MF: ATP binding;GO:0006810 BP: transport;GO:0016021 CC: integral component of membrane;GO:0016887 MF: ATPase activity;GO:0042626 MF: ATPase activity, coupled to transmembrane movement of substances;GO:0055085 BP: transmembrane transport	G	PF00664; PF00005	IPR003439; IPR003593; IPR011527; IPR017871; IPR027417	GO:0005524; GO:0006810; GO:0016021; GO:0016887; GO:0042626; GO:0055085
TraesCS2B02G012100.3	1	***	tr|G7ILW5|G7ILW5_MEDTR	ABC transporter B family-like protein	PF00664: ABC transporter transmembrane region; PF00005: ABC transporter	IPR003439: ABC transporter-like; IPR003593: AAA+ ATPase domain; IPR011527: ABC transporter type 1, transmembrane domain; IPR017871: ABC transporter, conserved site; IPR027417: P-loop containing nucleoside triphosphate hydrolase	GO:0005524 MF: ATP binding;GO:0006810 BP: transport;GO:0016021 CC: integral component of membrane;GO:0016887 MF: ATPase activity;GO:0042626 MF: ATPase activity, coupled to transmembrane movement of substances;GO:0055085 BP: transmembrane transport	G	PF00664; PF00005	IPR003439; IPR003593; IPR011527; IPR017871; IPR027417	GO:0005524; GO:0006810; GO:0016021; GO:0016887; GO:0042626; GO:0055085
TraesCS4A02G212900.1	1	***	tr|B9SFS4|B9SFS4_RICCO	Pentatricopeptide repeat-containing protein, putative	PF01535: PPR repeat	IPR002885: Pentatricopeptide repeat; IPR011990: Tetratricopeptide-like helical domain	GO:0005515 MF: protein binding	G	PF01535	IPR002885; IPR011990	GO:0005515
TraesCS2B02G012100.1	0	***	tr|G7ILW5|G7ILW5_MEDTR	ABC transporter B family-like protein	PF00664: ABC transporter transmembrane region; PF00005: ABC transporter	IPR003439: ABC transporter-like; IPR003593: AAA+ ATPase domain; IPR011527: ABC transporter type 1, transmembrane domain; IPR017871: ABC transporter, conserved site; IPR027417: P-loop containing nucleoside triphosphate hydrolase	GO:0005524 MF: ATP binding;GO:0006810 BP: transport;GO:0016021 CC: integral component of membrane;GO:0016887 MF: ATPase activity;GO:0042626 MF: ATPase activity, coupled to transmembrane movement of substances;GO:0055085 BP: transmembrane transport	G	PF00664; PF00005	IPR003439; IPR003593; IPR011527; IPR017871; IPR027417	GO:0005524; GO:0006810; GO:0016021; GO:0016887; GO:0042626; GO:0055085
TraesCS2B02G012100.4	0	***	tr|G7ILW5|G7ILW5_MEDTR	ABC transporter B family-like protein	PF00664: ABC transporter transmembrane region; PF00005: ABC transporter	IPR003439: ABC transporter-like; IPR003593: AAA+ ATPase domain; IPR011527: ABC transporter type 1, transmembrane domain; IPR017871: ABC transporter, conserved site; IPR027417: P-loop containing nucleoside triphosphate hydrolase	GO:0005524 MF: ATP binding;GO:0006810 BP: transport;GO:0016021 CC: integral component of membrane;GO:0016887 MF: ATPase activity;GO:0042626 MF: ATPase activity, coupled to transmembrane movement of substances;GO:0055085 BP: transmembrane transport	G	PF00664; PF00005	IPR003439; IPR003593; IPR011527; IPR017871; IPR027417	GO:0005524; GO:0006810; GO:0016021; GO:0016887; GO:0042626; GO:0055085
TraesCS7D02G260200.1	1	***	tr|K3YHD5|K3YHD5_SETIT	Uridine kinase	PF00485: Phosphoribulokinase / Uridine kinase family; PF14681: Uracil phosphoribosyltransferase	IPR000764: Uridine kinase-like; IPR006083: Phosphoribulokinase/uridine kinase; IPR027417: P-loop containing nucleoside triphosphate hydrolase; IPR029057: Phosphoribosyltransferase-like	GO:0005524 MF: ATP binding;GO:0008152 BP: metabolic process;GO:0016301 MF: kinase activity	G	PF00485; PF14681	IPR000764; IPR006083; IPR027417; IPR029057	GO:0005524; GO:0008152; GO:0016301
TraesCS7D02G260200.3	0	***	tr|M7YW92|M7YW92_TRIUA	Uridine kinase	PF00485: Phosphoribulokinase / Uridine kinase family; PF14681: Uracil phosphoribosyltransferase	IPR000764: Uridine kinase-like; IPR006083: Phosphoribulokinase/uridine kinase; IPR027417: P-loop containing nucleoside triphosphate hydrolase; IPR029057: Phosphoribosyltransferase-like	GO:0005524 MF: ATP binding;GO:0008152 BP: metabolic process;GO:0016301 MF: kinase activity	G	PF00485; PF14681	IPR000764; IPR006083; IPR027417; IPR029057	GO:0005524; GO:0008152; GO:0016301
TraesCS7D02G260200.2	0	***	tr|K3YHD5|K3YHD5_SETIT	Uridine kinase	PF00485: Phosphoribulokinase / Uridine kinase family; PF14681: Uracil phosphoribosyltransferase	IPR000764: Uridine kinase-like; IPR006083: Phosphoribulokinase/uridine kinase; IPR027417: P-loop containing nucleoside triphosphate hydrolase; IPR029057: Phosphoribosyltransferase-like	GO:0005524 MF: ATP binding;GO:0008152 BP: metabolic process;GO:0016301 MF: kinase activity	G	PF00485; PF14681	IPR000764; IPR006083; IPR027417; IPR029057	GO:0005524; GO:0008152; GO:0016301
TraesCS5B02G389500.1	1	--*	tr|A0A061GBF7|A0A061GBF7_THECC	Pre-mRNA cleavage complex 2 protein Pcf11, putative isoform 2				G
TraesCS1A02G043400.1	1	***	tr|Q6K268|Q6K268_ORYSJ	Ankyrin repeat protein-like	PF12796: Ankyrin repeats (3 copies); PF13181: Tetratricopeptide repeat	IPR002110: Ankyrin repeat; IPR011990: Tetratricopeptide-like helical domain; IPR013026: Tetratricopeptide repeat-containing domain; IPR019734: Tetratricopeptide repeat; IPR020683: Ankyrin repeat-containing domain	GO:0005515 MF: protein binding	G	PF12796; PF13181	IPR002110; IPR011990; IPR013026; IPR019734; IPR020683	GO:0005515
TraesCS6D02G267100.2	0	***	tr|A0A023GS52|A0A023GS52_SOYBN	CONSTANS-like zinc finger protein	PF06203: CCT motif	IPR000315: B-box-type zinc finger; IPR010402: CCT domain	GO:0005515 MF: protein binding;GO:0005622 CC: intracellular;GO:0008270 MF: zinc ion binding	TE?	PF06203	IPR000315; IPR010402	GO:0005515; GO:0005622; GO:0008270
TraesCS6D02G267100.1	1	***	tr|A0A023GS52|A0A023GS52_SOYBN	CONSTANS-like zinc finger protein	PF06203: CCT motif	IPR000315: B-box-type zinc finger; IPR010402: CCT domain	GO:0005515 MF: protein binding;GO:0005622 CC: intracellular;GO:0008270 MF: zinc ion binding	TE?	PF06203	IPR000315; IPR010402	GO:0005515; GO:0005622; GO:0008270
TraesCS1D02G315100.1	1	***	tr|B6UI73|B6UI73_MAIZE	Early light-induced protein	PF00504: Chlorophyll A-B binding protein	IPR022796: Chlorophyll A-B binding protein; IPR023329: Chlorophyll a/b binding protein domain		G	PF00504	IPR022796; IPR023329
TraesCS2A02G342000.1	1	-**	sp|D3QFZ3|SCDA_STALH	Iron-sulfur cluster repair protein ScdA				G
TraesCS7D02G372200.1	1	***	tr|B6TYH4|B6TYH4_MAIZE	Stress regulated protein				G
TraesCS2A02G543200.1	1	***	tr|C0LGP3|C0LGP3_ARATH	Leucine-rich repeat receptor-like protein kinase	PF08263: Leucine rich repeat N-terminal domain; PF13516: Leucine Rich repeat; PF00560: Leucine Rich Repeat; PF13855: Leucine rich repeat	IPR001611: Leucine-rich repeat; IPR003591: Leucine-rich repeat, typical subtype; IPR013210: Leucine-rich repeat-containing N-terminal, plant-type; IPR032675: Leucine-rich repeat domain, L domain-like	GO:0005515 MF: protein binding	G	PF08263; PF13516; PF00560; PF13855	IPR001611; IPR003591; IPR013210; IPR032675	GO:0005515
TraesCS2B02G399800.1	1	***	AT1G07090.1	LIGHT-DEPENDENT SHORT HYPOCOTYLS-like protein (DUF640)	PF04852: Protein of unknown function (DUF640)	IPR006936: ALOG domain		G	PF04852	IPR006936
TraesCS2A02G213500.1	1	***	tr|A0A072U2X2|A0A072U2X2_MEDTR	Myb/SANT-like DNA-binding domain protein	PF12776: Myb/SANT-like DNA-binding domain	IPR024752: Myb/SANT-like domain		TE?	PF12776	IPR024752
TraesCS7B02G257500.2	0	***	tr|G7L901|G7L901_MEDTR	3-hydroxyisobutyryl-CoA hydrolase-like protein	PF16113: Enoyl-CoA hydratase/isomerase	IPR029045: ClpP/crotonase-like domain; IPR032259: Enoyl-CoA hydratase/isomerase, HIBYL-CoA-H type	GO:0003860 MF: 3-hydroxyisobutyryl-CoA hydrolase activity	G	PF16113	IPR029045; IPR032259	GO:0003860
TraesCS3B02G536100.1	1	***	tr|B6SUR9|B6SUR9_MAIZE	Glutathione S-transferase	PF13417: Glutathione S-transferase, N-terminal domain; PF00043: Glutathione S-transferase, C-terminal domain	IPR004045: Glutathione S-transferase, N-terminal; IPR004046: Glutathione S-transferase, C-terminal; IPR010987: Glutathione S-transferase, C-terminal-like; IPR012336: Thioredoxin-like fold	GO:0005515 MF: protein binding	G	PF13417; PF00043	IPR004045; IPR004046; IPR010987; IPR012336	GO:0005515
TraesCS2A02G190400.1	1	***	tr|B6TAS3|B6TAS3_MAIZE	RNA-binding protein	PF00076: RNA recognition motif. (a.k.a. RRM, RBD, or RNP domain)	IPR000504: RNA recognition motif domain	GO:0003676 MF: nucleic acid binding	G	PF00076	IPR000504	GO:0003676
TraesCS5A02G346500.1	1	***	tr|A0A1E5UUB7|A0A1E5UUB7_9POAL	Protein PHLOEM PROTEIN 2-LIKE A10		IPR006311: Twin-arginine translocation pathway, signal sequence		G		IPR006311
TraesCS4B02G101500.1	1	*-*	tr|R7W8X7|R7W8X7_AEGTA	Chaperone protein dnaJ	PF00226: DnaJ domain; PF11926: Domain of unknown function (DUF3444)	IPR001623: DnaJ domain; IPR024593: Domain of unknown function DUF3444		G	PF00226; PF11926	IPR001623; IPR024593
TraesCS7B02G119800.1	1	*-*	tr|A0A1I9LRU9|A0A1I9LRU9_ARATH	Phosphatidylinositol 4-kinase gamma-like protein	PF00454: Phosphatidylinositol 3- and 4-kinase	IPR000403: Phosphatidylinositol 3-/4-kinase, catalytic domain; IPR029071: Ubiquitin-related domain	GO:0016301 MF: kinase activity	G	PF00454	IPR000403; IPR029071	GO:0016301
TraesCS6D02G287700.1	1	***	tr|B9I2G0|B9I2G0_POPTR	Kinase family protein	PF14381: Ethylene-responsive protein kinase Le-CTR1; PF07714: Protein tyrosine kinase	IPR000719: Protein kinase domain; IPR001245: Serine-threonine/tyrosine-protein kinase, catalytic domain; IPR008271: Serine/threonine-protein kinase, active site; IPR011009: Protein kinase-like domain; IPR017441: Protein kinase, ATP binding site	GO:0004672 MF: protein kinase activity;GO:0005524 MF: ATP binding;GO:0006468 BP: protein phosphorylation	G	PF14381; PF07714	IPR000719; IPR001245; IPR008271; IPR011009; IPR017441	GO:0004672; GO:0005524; GO:0006468
TraesCS6A02G299900.1	1	--*	sp|Q9C075|K1C23_HUMAN	Keratin, type I cytoskeletal 23				G
TraesCS5A02G037000.1	1	--*	AT5G41220.2	glutathione S-transferase THETA 3	PF14303: No apical meristem-associated C-terminal domain	IPR029466: No apical meristem-associated, C-terminal domain		G	PF14303	IPR029466
TraesCS6A02G236000.1	1	***	tr|A0A0K9PV75|A0A0K9PV75_ZOSMR	Calcium-dependent lipid-binding domain-containing protein	PF00168: C2 domain	IPR000008: C2 domain	GO:0005515 MF: protein binding	G	PF00168	IPR000008	GO:0005515
TraesCS7B02G466700.1	1	*-*	tr|M8B306|M8B306_AEGTA	F-box protein	PF00646: F-box domain	IPR001810: F-box domain; IPR015915: Kelch-type beta propeller; IPR017451: F-box associated interaction domain	GO:0005515 MF: protein binding	TE?	PF00646	IPR001810; IPR015915; IPR017451	GO:0005515
TraesCS2A02G575500.1	1	***	tr|R7VZK0|R7VZK0_AEGTA	Thioredoxin	PF00085: Thioredoxin	IPR012336: Thioredoxin-like fold; IPR013766: Thioredoxin domain	GO:0045454 BP: cell redox homeostasis	G	PF00085	IPR012336; IPR013766	GO:0045454
TraesCS7D02G195200.1	1	***	tr|A0A1D6CYC9|A0A1D6CYC9_WHEAT	Peroxidase	PF00141: Peroxidase	IPR000823: Plant peroxidase; IPR002016: Haem peroxidase, plant/fungal/bacterial; IPR010255: Haem peroxidase; IPR019793: Peroxidases heam-ligand binding site; IPR019794: Peroxidase, active site	GO:0004601 MF: peroxidase activity;GO:0006979 BP: response to oxidative stress;GO:0020037 MF: heme binding;GO:0055114 BP: oxidation-reduction process	G	PF00141	IPR000823; IPR002016; IPR010255; IPR019793; IPR019794	GO:0004601; GO:0006979; GO:0020037; GO:0055114
TraesCS4A02G292300.1	1	***	tr|Q84R74|Q84R74_ORYSJ	Endo-1,4-beta-xylanase, putative, expressed	PF02018: Carbohydrate binding domain; PF00331: Glycosyl hydrolase family 10	IPR001000: Glycoside hydrolase family 10 domain; IPR003305: Carbohydrate-binding, CenC-like; IPR008979: Galactose-binding domain-like; IPR017853: Glycoside hydrolase superfamily; IPR031158: Glycosyl hydrolases family 10, active site	GO:0004553 MF: hydrolase activity, hydrolyzing O-glycosyl compounds;GO:0005975 BP: carbohydrate metabolic process;GO:0016798 MF: hydrolase activity, acting on glycosyl bonds	G	PF02018; PF00331	IPR001000; IPR003305; IPR008979; IPR017853; IPR031158	GO:0004553; GO:0005975; GO:0016798
TraesCS4A02G432800.1	1	***	tr|M8BMI5|M8BMI5_AEGTA	Anthocyanin 5-aromatic acyltransferase	PF02458: Transferase family	IPR003480: Transferase	GO:0016747 MF: transferase activity, transferring acyl groups other than amino-acyl groups	G	PF02458	IPR003480	GO:0016747
TraesCS2D02G082100.1	1	***	tr|R7W394|R7W394_AEGTA	Peroxidase	PF00141: Peroxidase	IPR000823: Plant peroxidase; IPR002016: Haem peroxidase, plant/fungal/bacterial; IPR010255: Haem peroxidase; IPR019794: Peroxidase, active site	GO:0004601 MF: peroxidase activity;GO:0006979 BP: response to oxidative stress;GO:0020037 MF: heme binding;GO:0055114 BP: oxidation-reduction process	G	PF00141	IPR000823; IPR002016; IPR010255; IPR019794	GO:0004601; GO:0006979; GO:0020037; GO:0055114
TraesCS7A02G504700.1	1	***	tr|A0A1D6CLU1|A0A1D6CLU1_WHEAT	Patatin	PF01734: Patatin-like phospholipase	IPR002641: Patatin-like phospholipase domain; IPR016035: Acyl transferase/acyl hydrolase/lysophospholipase	GO:0006629 BP: lipid metabolic process;GO:0008152 BP: metabolic process	G	PF01734	IPR002641; IPR016035	GO:0006629; GO:0008152
TraesCS7B02G399800.1	1	***	tr|M7YHQ1|M7YHQ1_TRIUA	60S ribosomal protein L30	PF01248: Ribosomal protein L7Ae/L30e/S12e/Gadd45 family	IPR000231: Ribosomal protein L30e; IPR004038: Ribosomal protein L7Ae/L30e/S12e/Gadd45; IPR022991: Ribosomal protein L30e, conserved site; IPR029064: 50S ribosomal protein L30e-like	GO:0003735 MF: structural constituent of ribosome;GO:0005622 CC: intracellular;GO:0005840 CC: ribosome;GO:0006412 BP: translation	G	PF01248	IPR000231; IPR004038; IPR022991; IPR029064	GO:0003735; GO:0005622; GO:0005840; GO:0006412
TraesCS4A02G244000.1	0	***	tr|I0Z6X2|I0Z6X2_COCSC	WD40 repeat-like protein	PF00400: WD domain, G-beta repeat; PF08149: BING4CT (NUC141) domain	IPR001680: WD40 repeat; IPR012952: BING4, C-terminal domain; IPR015943: WD40/YVTN repeat-like-containing domain; IPR017986: WD40-repeat-containing domain; IPR019775: WD40 repeat, conserved site	GO:0005515 MF: protein binding	G	PF00400; PF08149	IPR001680; IPR012952; IPR015943; IPR017986; IPR019775	GO:0005515
TraesCS3B02G089400.1	1	***	tr|M8AQH0|M8AQH0_TRIUA	Protein transport protein Sec61 subunit gamma		IPR023391: Protein translocase SecE domain		G		IPR023391
TraesCS2D02G087400.1	1	*-*	tr|A0A076L230|A0A076L230_GOSHI	Heat shock transcription factor	PF00447: HSF-type DNA-binding	IPR000232: Heat shock factor (HSF)-type, DNA-binding; IPR011991: Winged helix-turn-helix DNA-binding domain	GO:0003700 MF: transcription factor activity, sequence-specific DNA binding;GO:0005634 CC: nucleus;GO:0006355 BP: regulation of transcription, DNA-templated;GO:0043565 MF: sequence-specific DNA binding	G	PF00447	IPR000232; IPR011991	GO:0003700; GO:0005634; GO:0006355; GO:0043565
TraesCS7D02G119500.1	1	*-*	tr|F4J0C4|F4J0C4_ARATH	Actin cross-linking protein, putative (DUF569)	PF04601: Domain of unknown function (DUF569)	IPR007679: Domain of unknown function DUF569; IPR008999: Actin cross-linking		G	PF04601	IPR007679; IPR008999
TraesCS1A02G308400.1	1	***	tr|W4ZS11|W4ZS11_WHEAT	Proteasome subunit alpha type	PF10584: Proteasome subunit A N-terminal signature; PF00227: Proteasome subunit	IPR000426: Proteasome alpha-subunit, N-terminal domain; IPR001353: Proteasome, subunit alpha/beta; IPR023332: Proteasome alpha-type subunit; IPR029055: Nucleophile aminohydrolases, N-terminal	GO:0004175 MF: endopeptidase activity;GO:0004298 MF: threonine-type endopeptidase activity;GO:0005839 CC: proteasome core complex;GO:0006511 BP: ubiquitin-dependent protein catabolic process;GO:0019773 CC: proteasome core complex, alpha-subunit complex;GO:0051603 BP: proteolysis involved in cellular protein catabolic process	G	PF10584; PF00227	IPR000426; IPR001353; IPR023332; IPR029055	GO:0004175; GO:0004298; GO:0005839; GO:0006511; GO:0019773; GO:0051603
TraesCS4B02G260000.1	1	--*	AT3G09180.3	mediator of RNA polymerase II transcription subunit				G
TraesCS5B02G146200.1	0	*-*	tr|A0A0B0P6X9|A0A0B0P6X9_GOSAR	Poly (A) RNA polymerase cid14	PF03828: Cid1 family poly A polymerase	IPR002058: PAP/25A-associated		G	PF03828	IPR002058
TraesCS5B02G146200.2	1	*-*	tr|A0A0B0P6X9|A0A0B0P6X9_GOSAR	Poly (A) RNA polymerase cid14				G
TraesCS5B02G146200.3	0	*-*	tr|A0A0B0P6X9|A0A0B0P6X9_GOSAR	Poly (A) RNA polymerase cid14				G
TraesCS1D02G106000.1	1	*-*	tr|A0A0K9PNX3|A0A0K9PNX3_ZOSMR	Fe/S biogenesis protein nfuA	PF08712: Scaffold protein Nfu/NifU N terminal; PF01106: NifU-like domain	IPR001075: NIF system FeS cluster assembly, NifU, C-terminal; IPR014824: Scaffold protein Nfu/NifU, N-terminal	GO:0005506 MF: iron ion binding;GO:0016226 BP: iron-sulfur cluster assembly;GO:0051536 MF: iron-sulfur cluster binding	G	PF08712; PF01106	IPR001075; IPR014824	GO:0005506; GO:0016226; GO:0051536
TraesCS6B02G437100.1	1	-**	AT3G52680.1	F-box/RNI-like/FBD-like domains-containing protein	PF00646: F-box domain	IPR001810: F-box domain; IPR032675: Leucine-rich repeat domain, L domain-like	GO:0005515 MF: protein binding	TE?	PF00646	IPR001810; IPR032675	GO:0005515
TraesCS4A02G396200.1	1	***	tr|G7KZU9|G7KZU9_MEDTR	WRKY family transcription factor	PF03106: WRKY DNA -binding domain	IPR003657: WRKY domain	GO:0003700 MF: transcription factor activity, sequence-specific DNA binding;GO:0006355 BP: regulation of transcription, DNA-templated;GO:0043565 MF: sequence-specific DNA binding	G	PF03106	IPR003657	GO:0003700; GO:0006355; GO:0043565
TraesCS3A02G150000.1	1	--*	sp|O88984|NXF1_RAT	Nuclear RNA export factor 1				G
TraesCS4A02G375600.1	1	***	tr|M7Y8U8|M7Y8U8_TRIUA	Ribosome production factor 1	PF04427: Brix domain	IPR004154: Anticodon-binding; IPR007109: Brix domain		G	PF04427	IPR004154; IPR007109
TraesCS7A02G089000.1	1	***	tr|W5HE61|W5HE61_WHEAT	Acyl-[acyl-carrier-protein] hydrolase	PF12590: Acyl-ATP thioesterase; PF01643: Acyl-ACP thioesterase	IPR002864: Acyl-ACP thioesterase; IPR021113: Acyl-ACP-thioesterase, N-terminal; IPR029069: HotDog domain	GO:0006633 BP: fatty acid biosynthetic process;GO:0016790 MF: thiolester hydrolase activity	G	PF12590; PF01643	IPR002864; IPR021113; IPR029069	GO:0006633; GO:0016790
TraesCS6D02G044200.1	1	***	tr|R7WBN6|R7WBN6_AEGTA	WAT1-related protein	PF00892: EamA-like transporter family	IPR000620: EamA domain	GO:0016020 CC: membrane;GO:0016021 CC: integral component of membrane	G	PF00892	IPR000620	GO:0016020; GO:0016021
TraesCS7D02G039400.1	1	***	tr|A0A072VF81|A0A072VF81_MEDTR	Plant/F18O14-17 protein		IPR015943: WD40/YVTN repeat-like-containing domain	GO:0005515 MF: protein binding	G		IPR015943	GO:0005515
TraesCS7A02G335100.1	0	***	tr|A0A1D6BIS5|A0A1D6BIS5_WHEAT	Reticulon-like protein	PF02453: Reticulon	IPR003388: Reticulon		G	PF02453	IPR003388
TraesCS1D02G196400.1	1	***	tr|B4FJ79|B4FJ79_MAIZE	PLATZ transcription factor	PF04640: PLATZ transcription factor	IPR006734: Protein of unknown function DUF597		G	PF04640	IPR006734
TraesCS2A02G172400.2	0	***	AT5G20520.1	alpha/beta-Hydrolases superfamily protein	PF00326: Prolyl oligopeptidase family	IPR001375: Peptidase S9, prolyl oligopeptidase, catalytic domain; IPR029058: Alpha/Beta hydrolase fold	GO:0006508 BP: proteolysis;GO:0008236 MF: serine-type peptidase activity	G	PF00326	IPR001375; IPR029058	GO:0006508; GO:0008236
TraesCS2A02G172400.1	1	***	AT5G20520.1	alpha/beta-Hydrolases superfamily protein	PF00326: Prolyl oligopeptidase family	IPR001375: Peptidase S9, prolyl oligopeptidase, catalytic domain; IPR029058: Alpha/Beta hydrolase fold	GO:0006508 BP: proteolysis;GO:0008236 MF: serine-type peptidase activity	G	PF00326	IPR001375; IPR029058	GO:0006508; GO:0008236
TraesCS7B02G120900.1	1	***	tr|B6UI73|B6UI73_MAIZE	Early light-induced protein	PF00504: Chlorophyll A-B binding protein	IPR022796: Chlorophyll A-B binding protein; IPR023329: Chlorophyll a/b binding protein domain		G	PF00504	IPR022796; IPR023329
TraesCS6B02G244000.2	1	***	tr|M8ANK7|M8ANK7_TRIUA	Transcription factor GTE9	PF00439: Bromodomain; PF17035: Bromodomain extra-terminal - transcription regulation	IPR001487: Bromodomain; IPR027353: NET domain	GO:0005515 MF: protein binding	G	PF00439; PF17035	IPR001487; IPR027353	GO:0005515
TraesCS5D02G526500.1	1	--*	AT1G67390.1	F-box family protein		IPR001810: F-box domain; IPR032675: Leucine-rich repeat domain, L domain-like	GO:0005515 MF: protein binding	TE?		IPR001810; IPR032675	GO:0005515
TraesCS7B02G359400.1	1	***	tr|A0A097PNZ0|A0A097PNZ0_BRADI	RNA polymerase II transcription mediator	PF10156: Subunit 17 of Mediator complex	IPR019313: Mediator complex, subunit Med17	GO:0001104 MF: RNA polymerase II transcription cofactor activity;GO:0006357 BP: regulation of transcription from RNA polymerase II promoter;GO:0016592 CC: mediator complex	G	PF10156	IPR019313	GO:0001104; GO:0006357; GO:0016592
TraesCS5B02G000400.2	1	***	tr|C3TX70|C3TX70_BRASY	Protein kinase	PF00069: Protein kinase domain	IPR000719: Protein kinase domain; IPR008271: Serine/threonine-protein kinase, active site; IPR011009: Protein kinase-like domain; IPR017441: Protein kinase, ATP binding site	GO:0004672 MF: protein kinase activity;GO:0005524 MF: ATP binding;GO:0006468 BP: protein phosphorylation	G	PF00069	IPR000719; IPR008271; IPR011009; IPR017441	GO:0004672; GO:0005524; GO:0006468
TraesCS5B02G000400.1	0	***	tr|C3TX70|C3TX70_BRASY	Protein kinase	PF00069: Protein kinase domain	IPR000719: Protein kinase domain; IPR008271: Serine/threonine-protein kinase, active site; IPR011009: Protein kinase-like domain; IPR017441: Protein kinase, ATP binding site	GO:0004672 MF: protein kinase activity;GO:0005524 MF: ATP binding;GO:0006468 BP: protein phosphorylation	G	PF00069	IPR000719; IPR008271; IPR011009; IPR017441	GO:0004672; GO:0005524; GO:0006468
TraesCS5D02G260100.1	1	--*	AT1G30930.1	F-box family protein	PF12937: F-box-like	IPR001810: F-box domain	GO:0005515 MF: protein binding	TE?	PF12937	IPR001810	GO:0005515
TraesCS2B02G508800.1	1	--*	tr|A0A0K9PYC7|A0A0K9PYC7_ZOSMR	Kinase-like protein				G
TraesCS5D02G511000.1	1	*-*	tr|W9QSI6|W9QSI6_9ROSA	BTB/POZ domain-containing protein	PF00651: BTB/POZ domain	IPR000210: BTB/POZ domain; IPR011333: SKP1/BTB/POZ domain	GO:0005515 MF: protein binding	G	PF00651	IPR000210; IPR011333	GO:0005515
TraesCS2B02G147300.1	0	***	tr|A0A0K9P0N3|A0A0K9P0N3_ZOSMR	Homeodomain-like transcriptional regulator	PF02791: DDT domain; PF15612: WSTF, HB1, Itc1p, MBD9 motif 1; PF15613: Williams-Beuren syndrome DDT (WSD), D-TOX E motif	IPR018501: DDT domain; IPR028941: WHIM2 domain; IPR028942: WHIM1 domain		G	PF02791; PF15612; PF15613	IPR018501; IPR028941; IPR028942
TraesCS1D02G367000.1	1	--*	AT5G54300.1	cotton fiber-like protein (DUF761)	PF14364: Domain of unknown function (DUF4408); PF05553: Cotton fibre expressed protein	IPR008480: Protein of unknown function DUF761, plant; IPR015943: WD40/YVTN repeat-like-containing domain; IPR025520: Domain of unknown function DUF4408	GO:0005515 MF: protein binding	G	PF14364; PF05553	IPR008480; IPR015943; IPR025520	GO:0005515
TraesCS2B02G147300.2	0	***	tr|A0A0K9P0N3|A0A0K9P0N3_ZOSMR	Homeodomain-like transcriptional regulator	PF02791: DDT domain; PF15612: WSTF, HB1, Itc1p, MBD9 motif 1; PF15613: Williams-Beuren syndrome DDT (WSD), D-TOX E motif	IPR018501: DDT domain; IPR028941: WHIM2 domain; IPR028942: WHIM1 domain		G	PF02791; PF15612; PF15613	IPR018501; IPR028941; IPR028942
TraesCS2B02G147300.5	0	*-*	tr|W9R300|W9R300_9ROSA	Homeobox protein	PF00046: Homeobox domain; PF02791: DDT domain; PF15612: WSTF, HB1, Itc1p, MBD9 motif 1; PF15613: Williams-Beuren syndrome DDT (WSD), D-TOX E motif	IPR001356: Homeobox domain; IPR009057: Homeobox domain-like; IPR018501: DDT domain; IPR028941: WHIM2 domain; IPR028942: WHIM1 domain	GO:0003677 MF: DNA binding	G	PF00046; PF02791; PF15612; PF15613	IPR001356; IPR009057; IPR018501; IPR028941; IPR028942	GO:0003677
TraesCS2B02G147300.4	1	*-*	tr|A0A0A0KNF2|A0A0A0KNF2_CUCSA	Homeobox protein	PF00046: Homeobox domain; PF02791: DDT domain; PF15612: WSTF, HB1, Itc1p, MBD9 motif 1; PF15613: Williams-Beuren syndrome DDT (WSD), D-TOX E motif	IPR001356: Homeobox domain; IPR009057: Homeobox domain-like; IPR018501: DDT domain; IPR028941: WHIM2 domain; IPR028942: WHIM1 domain	GO:0003677 MF: DNA binding	G	PF00046; PF02791; PF15612; PF15613	IPR001356; IPR009057; IPR018501; IPR028941; IPR028942	GO:0003677
TraesCS3B02G524600.1	1	***	tr|D8L9Q0|D8L9Q0_WHEAT	Cytochrome P450, putative, expressed	PF00067: Cytochrome P450	IPR001128: Cytochrome P450; IPR002401: Cytochrome P450, E-class, group I; IPR017972: Cytochrome P450, conserved site	GO:0005506 MF: iron ion binding;GO:0016705 MF: oxidoreductase activity, acting on paired donors, with incorporation or reduction of molecular oxygen;GO:0020037 MF: heme binding;GO:0055114 BP: oxidation-reduction process	G	PF00067	IPR001128; IPR002401; IPR017972	GO:0005506; GO:0016705; GO:0020037; GO:0055114
TraesCS2A02G551100.1	1	***	tr|Q9FXQ7|Q9FXQ7_MAIZE	Response regulator	PF00072: Response regulator receiver domain	IPR001789: Signal transduction response regulator, receiver domain; IPR011006: CheY-like superfamily	GO:0000160 BP: phosphorelay signal transduction system	G	PF00072	IPR001789; IPR011006	GO:0000160
TraesCS5A02G523600.1	1	--*	AT2G39435.6	Phosphatidylinositol N-acetyglucosaminlytransferase subunit P-like protein				G
TraesCS5A02G523600.2	0	--*	AT2G39435.6	Phosphatidylinositol N-acetyglucosaminlytransferase subunit P-like protein				G
TraesCS7A02G503700.1	1	*-*	tr|A0A061ECK1|A0A061ECK1_THECC	50S ribosomal protein L2, putative	PF00181: Ribosomal Proteins L2, RNA binding domain; PF03947: Ribosomal Proteins L2, C-terminal domain	IPR002171: Ribosomal protein L2; IPR005880: Ribosomal protein L2, bacterial/organellar-type; IPR008991: Translation protein SH3-like domain; IPR012340: Nucleic acid-binding, OB-fold; IPR014722: Ribosomal protein L2 domain 2; IPR014726: Ribosomal protein L2, domain 3; IPR022666: Ribosomal Proteins L2, RNA binding domain; IPR022669: Ribosomal protein L2, C-terminal; IPR022671: Ribosomal protein L2,…	GO:0003723 MF: RNA binding;GO:0003735 MF: structural constituent of ribosome;GO:0005622 CC: intracellular;GO:0005840 CC: ribosome;GO:0006412 BP: translation;GO:0015934 CC: large ribosomal subunit;GO:0016740 MF: transferase activity	G	PF00181; PF03947	IPR002171; IPR005880; IPR008991; IPR012340; IPR014722; IPR014726; IPR022666; IPR022669; IPR022671	GO:0003723; GO:0003735; GO:0005622; GO:0005840; GO:0006412; GO:0015934; GO:0016740
TraesCS1B02G008000.2	0	***	tr|Q8S3W5|Q8S3W5_HORVV	Mei2-like protein	PF00076: RNA recognition motif. (a.k.a. RRM, RBD, or RNP domain); PF04059: RNA recognition motif 2	IPR000504: RNA recognition motif domain; IPR007201: Mei2/Mei2-like, C-terminal RNA recognition motif	GO:0003676 MF: nucleic acid binding	G	PF00076; PF04059	IPR000504; IPR007201	GO:0003676
TraesCS1B02G008000.1	1	***	tr|Q8S3W5|Q8S3W5_HORVV	Mei2-like protein	PF00076: RNA recognition motif. (a.k.a. RRM, RBD, or RNP domain); PF04059: RNA recognition motif 2	IPR000504: RNA recognition motif domain; IPR007201: Mei2/Mei2-like, C-terminal RNA recognition motif	GO:0003676 MF: nucleic acid binding	G	PF00076; PF04059	IPR000504; IPR007201	GO:0003676
TraesCS2A02G272600.3	0	--*	sp|B7LQP1|RSXC_ESCF3	Electron transport complex subunit RsxC				G
TraesCS6B02G111900.1	1	***	tr|G7KNR9|G7KNR9_MEDTR	65-kDa microtubule-associated-like protein	PF03999: Microtubule associated protein (MAP65/ASE1 family)			G	PF03999
TraesCS6D02G201400.2	0	***	tr|Q1EP67|Q1EP67_MUSBA	Protein kinase, putative	PF12796: Ankyrin repeats (3 copies); PF07714: Protein tyrosine kinase	IPR000719: Protein kinase domain; IPR001245: Serine-threonine/tyrosine-protein kinase, catalytic domain; IPR002110: Ankyrin repeat; IPR011009: Protein kinase-like domain; IPR020635: Tyrosine-protein kinase, catalytic domain; IPR020683: Ankyrin repeat-containing domain	GO:0004672 MF: protein kinase activity;GO:0004713 MF: protein tyrosine kinase activity;GO:0005515 MF: protein binding;GO:0005524 MF: ATP binding;GO:0006468 BP: protein phosphorylation	G	PF12796; PF07714	IPR000719; IPR001245; IPR002110; IPR011009; IPR020635; IPR020683	GO:0004672; GO:0004713; GO:0005515; GO:0005524; GO:0006468
TraesCS3B02G500600.1	1	***	AT1G67390.1	F-box family protein	PF00646: F-box domain; PF08387: FBD	IPR001810: F-box domain; IPR006566: FBD domain; IPR032675: Leucine-rich repeat domain, L domain-like	GO:0005515 MF: protein binding	TE?	PF00646; PF08387	IPR001810; IPR006566; IPR032675	GO:0005515
TraesCS6D02G122300.1	1	***	tr|Q9LIN9|Q9LIN9_ARATH	O-fucosyltransferase family protein	PF10250: GDP-fucose protein O-fucosyltransferase	IPR019378: GDP-fucose protein O-fucosyltransferase; IPR024709: O-fucosyltransferase, plant		G	PF10250	IPR019378; IPR024709
TraesCS4A02G093200.1	1	***	AT1G27690.1	lipase, putative (DUF620)	PF04788: Protein of unknown function (DUF620)	IPR006873: Protein of unknown function DUF620		G	PF04788	IPR006873
TraesCS6D02G201400.1	1	***	tr|Q1EP67|Q1EP67_MUSBA	Protein kinase, putative	PF12796: Ankyrin repeats (3 copies); PF07714: Protein tyrosine kinase	IPR000719: Protein kinase domain; IPR001245: Serine-threonine/tyrosine-protein kinase, catalytic domain; IPR002110: Ankyrin repeat; IPR011009: Protein kinase-like domain; IPR020683: Ankyrin repeat-containing domain	GO:0004672 MF: protein kinase activity;GO:0005515 MF: protein binding;GO:0005524 MF: ATP binding;GO:0006468 BP: protein phosphorylation	G	PF12796; PF07714	IPR000719; IPR001245; IPR002110; IPR011009; IPR020683	GO:0004672; GO:0005515; GO:0005524; GO:0006468
TraesCS4B02G189500.1	1	***	tr|M7Z3H9|M7Z3H9_TRIUA	Laccase	PF07732: Multicopper oxidase; PF00394: Multicopper oxidase; PF07731: Multicopper oxidase	IPR001117: Multicopper oxidase, type 1; IPR002355: Multicopper oxidase, copper-binding site; IPR008972: Cupredoxin; IPR011706: Multicopper oxidase, type 2; IPR011707: Multicopper oxidase, type 3; IPR017761: Laccase; IPR033138: Multicopper oxidases, conserved site	GO:0005507 MF: copper ion binding;GO:0016491 MF: oxidoreductase activity;GO:0046274 BP: lignin catabolic process;GO:0048046 CC: apoplast;GO:0052716 MF: hydroquinone:oxygen oxidoreductase activity;GO:0055114 BP: oxidation-reduction process	G	PF07732; PF00394; PF07731	IPR001117; IPR002355; IPR008972; IPR011706; IPR011707; IPR017761; IPR033138	GO:0005507; GO:0016491; GO:0046274; GO:0048046; GO:0052716; GO:0055114
TraesCS2A02G273300.1	1	*-*	AT4G13160.1	zein-binding protein (Protein of unknown function, DUF593)	PF04576: Zein-binding	IPR007656: GTD-binding domain		G	PF04576	IPR007656
TraesCS2B02G146600.1	1	--*	AT2G35550.4	basic pentacysteine 7				G
TraesCS4A02G215500.1	1	***	tr|A0A1D1ZKF2|A0A1D1ZKF2_9ARAE	Rubredoxin		IPR024934: Rubredoxin-like domain	GO:0005506 MF: iron ion binding	G		IPR024934	GO:0005506
TraesCS1A02G176500.1	1	***	tr|M7ZSY6|M7ZSY6_TRIUA	U1 small nuclear ribonucleoprotein 70 kDa	PF12220: U1 small nuclear ribonucleoprotein of 70kDa MW N terminal; PF00076: RNA recognition motif. (a.k.a. RRM, RBD, or RNP domain)	IPR000504: RNA recognition motif domain; IPR022023: U1 small nuclear ribonucleoprotein of 70kDa N-terminal	GO:0003676 MF: nucleic acid binding	G	PF12220; PF00076	IPR000504; IPR022023	GO:0003676
TraesCS1A02G176500.3	0	***	tr|M8BQW8|M8BQW8_AEGTA	U1 small nuclear ribonucleoprotein 70 kDa	PF00076: RNA recognition motif. (a.k.a. RRM, RBD, or RNP domain)	IPR000504: RNA recognition motif domain	GO:0003676 MF: nucleic acid binding	G	PF00076	IPR000504	GO:0003676
TraesCS1A02G176500.2	0	***	tr|M8BQW8|M8BQW8_AEGTA	U1 small nuclear ribonucleoprotein 70 kDa	PF00076: RNA recognition motif. (a.k.a. RRM, RBD, or RNP domain)	IPR000504: RNA recognition motif domain	GO:0003676 MF: nucleic acid binding	G	PF00076	IPR000504	GO:0003676
TraesCS2D02G016800.1	0	***	tr|A0A1D5V2D3|A0A1D5V2D3_WHEAT	Laccase	PF07732: Multicopper oxidase; PF00394: Multicopper oxidase; PF07731: Multicopper oxidase	IPR001117: Multicopper oxidase, type 1; IPR008972: Cupredoxin; IPR011706: Multicopper oxidase, type 2; IPR011707: Multicopper oxidase, type 3	GO:0005507 MF: copper ion binding;GO:0016491 MF: oxidoreductase activity;GO:0055114 BP: oxidation-reduction process	G	PF07732; PF00394; PF07731	IPR001117; IPR008972; IPR011706; IPR011707	GO:0005507; GO:0016491; GO:0055114
TraesCS2D02G016800.2	1	***	tr|A0A1D5V2D3|A0A1D5V2D3_WHEAT	Laccase	PF07732: Multicopper oxidase; PF00394: Multicopper oxidase; PF07731: Multicopper oxidase	IPR001117: Multicopper oxidase, type 1; IPR002355: Multicopper oxidase, copper-binding site; IPR008972: Cupredoxin; IPR011706: Multicopper oxidase, type 2; IPR011707: Multicopper oxidase, type 3; IPR017761: Laccase	GO:0005507 MF: copper ion binding;GO:0016491 MF: oxidoreductase activity;GO:0046274 BP: lignin catabolic process;GO:0048046 CC: apoplast;GO:0052716 MF: hydroquinone:oxygen oxidoreductase activity;GO:0055114 BP: oxidation-reduction process	G	PF07732; PF00394; PF07731	IPR001117; IPR002355; IPR008972; IPR011706; IPR011707; IPR017761	GO:0005507; GO:0016491; GO:0046274; GO:0048046; GO:0052716; GO:0055114
TraesCS2A02G495800.2	0	***	tr|D8QX02|D8QX02_SELML	Eukaryotic translation initiation factor 3 subunit F	PF01398: JAB1/Mov34/MPN/PAD-1 ubiquitin protease; PF13012: Maintenance of mitochondrial structure and function	IPR000555: JAB1/MPN/MOV34 metalloenzyme domain; IPR024969: Rpn11/EIF3F, C-terminal	GO:0005515 MF: protein binding	G	PF01398; PF13012	IPR000555; IPR024969	GO:0005515
TraesCS2A02G495800.1	1	***	tr|D8QX02|D8QX02_SELML	Eukaryotic translation initiation factor 3 subunit F	PF01398: JAB1/Mov34/MPN/PAD-1 ubiquitin protease; PF13012: Maintenance of mitochondrial structure and function	IPR000555: JAB1/MPN/MOV34 metalloenzyme domain; IPR024969: Rpn11/EIF3F, C-terminal	GO:0005515 MF: protein binding	G	PF01398; PF13012	IPR000555; IPR024969	GO:0005515
TraesCS5D02G109300.2	1	***	tr|Q2QPD3|Q2QPD3_ORYSJ	Mitochondrial carrier protein, expressed	PF00153: Mitochondrial carrier protein	IPR018108: Mitochondrial substrate/solute carrier; IPR023395: Mitochondrial carrier domain		G	PF00153	IPR018108; IPR023395
TraesCS1B02G432100.1	1	--*	sp|Q7MWT4|LIPA_PORGI	Lipoyl synthase				G
TraesCS5D02G109300.1	0	***	tr|Q2QPD3|Q2QPD3_ORYSJ	Mitochondrial carrier protein, expressed	PF00153: Mitochondrial carrier protein	IPR018108: Mitochondrial substrate/solute carrier; IPR023395: Mitochondrial carrier domain		G	PF00153	IPR018108; IPR023395
TraesCS1A02G012400.1	1	***	tr|R7WFH9|R7WFH9_AEGTA	F-box protein	PF00646: F-box domain	IPR001810: F-box domain; IPR015915: Kelch-type beta propeller	GO:0005515 MF: protein binding	TE?	PF00646	IPR001810; IPR015915	GO:0005515
TraesCS2B02G365800.1	1	--*	sp|Q2KDZ5|IF2_RHIEC	Translation initiation factor IF-2				G
TraesCS6A02G223100.1	1	*-*	tr|A0A1D1Z5X6|A0A1D1Z5X6_9ARAE	Helicase protein MOM1				TE?
TraesCS6A02G223100.3	0	*-*	tr|A0A1D1Z5X6|A0A1D1Z5X6_9ARAE	Helicase protein MOM1				TE?
TraesCS6A02G223100.2	0	--*	AT3G53570.5	serine/threonine-protein kinase AFC1				G
TraesCS2D02G145300.1	1	***	tr|N1R0W2|N1R0W2_AEGTA	Transcription-associated protein 1	PF02259: FAT domain; PF00454: Phosphatidylinositol 3- and 4-kinase; PF02260: FATC domain	IPR000403: Phosphatidylinositol 3-/4-kinase, catalytic domain; IPR003151: PIK-related kinase, FAT; IPR003152: FATC domain; IPR011009: Protein kinase-like domain; IPR011989: Armadillo-like helical; IPR011990: Tetratricopeptide-like helical domain; IPR014009: PIK-related kinase; IPR016024: Armadillo-type fold	GO:0005488 MF: binding;GO:0005515 MF: protein binding;GO:0016301 MF: kinase activity	G	PF02259; PF00454; PF02260	IPR000403; IPR003151; IPR003152; IPR011009; IPR011989; IPR011990; IPR014009; IPR016024	GO:0005488; GO:0005515; GO:0016301
TraesCS7A02G261600.1	1	***	tr|M7Z930|M7Z930_TRIUA	60S ribosomal protein L7a	PF01248: Ribosomal protein L7Ae/L30e/S12e/Gadd45 family	IPR001921: Ribosomal protein L7A/L8; IPR004037: Ribosomal protein L7Ae conserved site; IPR004038: Ribosomal protein L7Ae/L30e/S12e/Gadd45; IPR018492: Ribosomal protein L7Ae/L8/Nhp2 family; IPR029064: 50S ribosomal protein L30e-like	GO:0030529 CC: intracellular ribonucleoprotein complex;GO:0042254 BP: ribosome biogenesis	G	PF01248	IPR001921; IPR004037; IPR004038; IPR018492; IPR029064	GO:0030529; GO:0042254
TraesCS2A02G124800.1	1	*-*	tr|A0A0A0KNF2|A0A0A0KNF2_CUCSA	Homeobox protein	PF00046: Homeobox domain; PF02791: DDT domain; PF15612: WSTF, HB1, Itc1p, MBD9 motif 1; PF15613: Williams-Beuren syndrome DDT (WSD), D-TOX E motif	IPR001356: Homeobox domain; IPR009057: Homeobox domain-like; IPR018501: DDT domain; IPR028941: WHIM2 domain; IPR028942: WHIM1 domain	GO:0003677 MF: DNA binding	G	PF00046; PF02791; PF15612; PF15613	IPR001356; IPR009057; IPR018501; IPR028941; IPR028942	GO:0003677
TraesCS5B02G559100.1	1	***	tr|A0A199V6V2|A0A199V6V2_ANACO	Sucrose nonfermenting 4-like protein	PF16561: Glycogen recognition site of AMP-activated protein kinase; PF00571: CBS domain	IPR000644: CBS domain; IPR013783: Immunoglobulin-like fold; IPR014756: Immunoglobulin E-set; IPR032640: AMP-activated protein kinase, glycogen-binding domain		G	PF16561; PF00571	IPR000644; IPR013783; IPR014756; IPR032640
TraesCS1A02G217000.1	1	***	tr|A0A103Y107|A0A103Y107_CYNCS	Cyclin-like protein	PF08613: Cyclin	IPR013763: Cyclin-like; IPR013922: Cyclin PHO80-like	GO:0000079 BP: regulation of cyclin-dependent protein serine/threonine kinase activity;GO:0019901 MF: protein kinase binding	G	PF08613	IPR013763; IPR013922	GO:0000079; GO:0019901
TraesCS5B02G422700.1	1	***	tr|B9RVQ0|B9RVQ0_RICCO	Actin, putative	PF00022: Actin	IPR004000: Actin family		G	PF00022	IPR004000
TraesCS5B02G062500.1	1	***	tr|B9SFG9|B9SFG9_RICCO	Acetyl-CoA carboxylase, putative	PF00289: Biotin carboxylase, N-terminal domain; PF02786: Carbamoyl-phosphate synthase L chain, ATP binding domain; PF02785: Biotin carboxylase C-terminal domain; PF00364: Biotin-requiring enzyme	IPR000089: Biotin/lipoyl attachment; IPR001882: Biotin-binding site; IPR005479: Carbamoyl-phosphate synthetase large subunit-like, ATP-binding domain; IPR005481: Biotin carboxylase-like, N-terminal domain; IPR005482: Biotin carboxylase, C-terminal; IPR011053: Single hybrid motif; IPR011054: Rudiment single hybrid motif; IPR011761: ATP-grasp fold; IPR011764: Biotin carboxylation domain; IPR013815:…	GO:0003824 MF: catalytic activity;GO:0004075 MF: biotin carboxylase activity;GO:0005524 MF: ATP binding;GO:0046872 MF: metal ion binding	G	PF00289; PF02786; PF02785; PF00364	IPR000089; IPR001882; IPR005479; IPR005481; IPR005482; IPR011053; IPR011054; IPR011761; IPR011764; IPR013815; IPR016185	GO:0003824; GO:0004075; GO:0005524; GO:0046872
TraesCS5A02G231500.1	1	***	tr|Q67U50|Q67U50_ORYSJ	Zinc finger protein-like		IPR013087: Zinc finger C2H2-type	GO:0003676 MF: nucleic acid binding	TE?		IPR013087	GO:0003676
TraesCS2A02G011600.1	1	***	tr|M7ZJQ4|M7ZJQ4_TRIUA	Werner Syndrome-like exonuclease	PF01612: 3'-5' exonuclease	IPR002562: 3'-5' exonuclease domain; IPR012337: Ribonuclease H-like domain	GO:0003676 MF: nucleic acid binding;GO:0006139 BP: nucleobase-containing compound metabolic process;GO:0008408 MF: 3'-5' exonuclease activity	G	PF01612	IPR002562; IPR012337	GO:0003676; GO:0006139; GO:0008408
TraesCS5D02G341700.1	1	***	tr|G7I8D2|G7I8D2_MEDTR	Syringolide-induced protein 14-1-1				G
TraesCS3A02G465200.1	1	***	AT5G49610.1	F-box family protein	PF12937: F-box-like; PF08268: F-box associated domain	IPR001810: F-box domain; IPR013187: F-box associated domain, type 3; IPR017451: F-box associated interaction domain	GO:0005515 MF: protein binding	TE?	PF12937; PF08268	IPR001810; IPR013187; IPR017451	GO:0005515
TraesCS3D02G148200.1	1	***	AT3G58120.1	Basic-leucine zipper (bZIP) transcription factor family protein	PF00170: bZIP transcription factor	IPR004827: Basic-leucine zipper domain	GO:0003700 MF: transcription factor activity, sequence-specific DNA binding;GO:0006355 BP: regulation of transcription, DNA-templated;GO:0043565 MF: sequence-specific DNA binding	G	PF00170	IPR004827	GO:0003700; GO:0006355; GO:0043565
TraesCS4A02G117100.1	1	***	tr|B9RZK6|B9RZK6_RICCO	Protein COBRA, putative	PF04833: COBRA-like protein	IPR006918: COBRA, plant	GO:0010215 BP: cellulose microfibril organization;GO:0016049 BP: cell growth;GO:0031225 CC: anchored component of membrane	G	PF04833	IPR006918	GO:0010215; GO:0016049; GO:0031225
TraesCS7A02G520300.1	1	***	tr|M8CDZ8|M8CDZ8_AEGTA	Charged multivesicular body protein 1	PF03357: Snf7	IPR005024: Snf7 family	GO:0007034 BP: vacuolar transport	G	PF03357	IPR005024	GO:0007034
TraesCS3B02G131500.2	1	***	tr|D3G8A5|D3G8A5_LOLPR	Ubiquitin-conjugating enzyme E2-like protein	PF00179: Ubiquitin-conjugating enzyme	IPR000608: Ubiquitin-conjugating enzyme E2; IPR016135: Ubiquitin-conjugating enzyme/RWD-like; IPR023313: Ubiquitin-conjugating enzyme, active site		G	PF00179	IPR000608; IPR016135; IPR023313
TraesCS3B02G131500.1	0	***	tr|A0A103YHB1|A0A103YHB1_CYNCS	Ubiquitin-conjugating enzyme, E2	PF00179: Ubiquitin-conjugating enzyme	IPR000608: Ubiquitin-conjugating enzyme E2; IPR016135: Ubiquitin-conjugating enzyme/RWD-like		G	PF00179	IPR000608; IPR016135
TraesCS2B02G389800.1	1	*-*	tr|B9SNN8|B9SNN8_RICCO	Nucleic acid binding protein, putative		IPR002652: Importin-alpha, importin-beta-binding domain	GO:0005634 CC: nucleus;GO:0005737 CC: cytoplasm;GO:0006606 BP: protein import into nucleus;GO:0008565 MF: protein transporter activity	G		IPR002652	GO:0005634; GO:0005737; GO:0006606; GO:0008565
TraesCS7D02G083100.1	1	***	tr|B9SDM0|B9SDM0_RICCO	Pentatricopeptide repeat-containing protein, putative	PF01535: PPR repeat; PF12854: PPR repeat; PF13041: PPR repeat family	IPR002885: Pentatricopeptide repeat; IPR011990: Tetratricopeptide-like helical domain	GO:0005515 MF: protein binding	G	PF01535; PF12854; PF13041	IPR002885; IPR011990	GO:0005515
TraesCS1B02G297800.1	1	***	tr|M7ZNK2|M7ZNK2_TRIUA	Serine/threonine-protein kinase ATM	PF00855: PWWP domain	IPR000313: PWWP domain		G	PF00855	IPR000313
TraesCS6B02G410900.2	1	***	tr|M8AGP1|M8AGP1_TRIUA	AP-1 complex subunit gamma-2	PF01602: Adaptin N terminal region; PF02883: Adaptin C-terminal domain	IPR002553: Clathrin/coatomer adaptor, adaptin-like, N-terminal; IPR008152: Clathrin adaptor, alpha/beta/gamma-adaptin, appendage, Ig-like subdomain; IPR008153: Gamma-adaptin ear (GAE) domain; IPR011989: Armadillo-like helical; IPR013041: Coatomer/clathrin adaptor appendage, Ig-like subdomain; IPR016024: Armadillo-type fold; IPR017107: Adaptor protein complex AP-1, gamma subunit	GO:0005488 MF: binding;GO:0005794 CC: Golgi apparatus;GO:0006886 BP: intracellular protein transport;GO:0008565 MF: protein transporter activity;GO:0015031 BP: protein transport;GO:0016192 BP: vesicle-mediated transport;GO:0030117 CC: membrane coat;GO:0030131 CC: clathrin adaptor complex	G	PF01602; PF02883	IPR002553; IPR008152; IPR008153; IPR011989; IPR013041; IPR016024; IPR017107	GO:0005488; GO:0005794; GO:0006886; GO:0008565; GO:0015031; GO:0016192; GO:0030117; GO:0030131
TraesCS5A02G367200.1	1	*-*	AT4G11800.1	Calcineurin-like metallo-phosphoesterase superfamily protein				G
TraesCS5A02G168500.2	1	***	tr|B9RCE0|B9RCE0_RICCO	Aminopeptidase, putative	PF01433: Peptidase family M1; PF11940: Domain of unknown function (DUF3458)	IPR012779: Peptidase M1, alanyl aminopeptidase; IPR014782: Peptidase M1, membrane alanine aminopeptidase, N-terminal; IPR024601: Peptidase M1, alanyl aminopeptidase, C-terminal	GO:0008237 MF: metallopeptidase activity;GO:0008270 MF: zinc ion binding	G	PF01433; PF11940	IPR012779; IPR014782; IPR024601	GO:0008237; GO:0008270
TraesCS5A02G168500.1	0	***	tr|B9RCE0|B9RCE0_RICCO	Aminopeptidase, putative	PF01433: Peptidase family M1; PF11940: Domain of unknown function (DUF3458)	IPR012779: Peptidase M1, alanyl aminopeptidase; IPR014782: Peptidase M1, membrane alanine aminopeptidase, N-terminal; IPR024601: Peptidase M1, alanyl aminopeptidase, C-terminal	GO:0008237 MF: metallopeptidase activity;GO:0008270 MF: zinc ion binding	G	PF01433; PF11940	IPR012779; IPR014782; IPR024601	GO:0008237; GO:0008270
TraesCS5A02G259400.2	1	***	tr|A0A061GQ82|A0A061GQ82_THECC	Eukaryotic aspartyl protease family protein, putative	PF14543: Xylanase inhibitor N-terminal; PF14541: Xylanase inhibitor C-terminal	IPR001461: Aspartic peptidase A1 family; IPR001969: Aspartic peptidase, active site; IPR021109: Aspartic peptidase domain; IPR032799: Xylanase inhibitor, C-terminal; IPR032861: Xylanase inhibitor, N-terminal; IPR033121: Peptidase family A1 domain	GO:0004190 MF: aspartic-type endopeptidase activity;GO:0006508 BP: proteolysis	G	PF14543; PF14541	IPR001461; IPR001969; IPR021109; IPR032799; IPR032861; IPR033121	GO:0004190; GO:0006508
TraesCS5A02G259400.1	0	***	tr|A0A061GQ82|A0A061GQ82_THECC	Eukaryotic aspartyl protease family protein, putative	PF14543: Xylanase inhibitor N-terminal; PF14541: Xylanase inhibitor C-terminal	IPR001461: Aspartic peptidase A1 family; IPR001969: Aspartic peptidase, active site; IPR021109: Aspartic peptidase domain; IPR032799: Xylanase inhibitor, C-terminal; IPR032861: Xylanase inhibitor, N-terminal; IPR033121: Peptidase family A1 domain	GO:0004190 MF: aspartic-type endopeptidase activity;GO:0006508 BP: proteolysis	G	PF14543; PF14541	IPR001461; IPR001969; IPR021109; IPR032799; IPR032861; IPR033121	GO:0004190; GO:0006508
TraesCS6B02G423000.1	1	***	tr|A0A068EUE1|A0A068EUE1_PENAM	Glutathione reductase	PF07992: Pyridine nucleotide-disulphide oxidoreductase; PF02852: Pyridine nucleotide-disulphide oxidoreductase, dimerisation domain	IPR004099: Pyridine nucleotide-disulphide oxidoreductase, dimerisation domain; IPR012999: Pyridine nucleotide-disulphide oxidoreductase, class I, active site; IPR016156: FAD/NAD-linked reductase, dimerisation domain; IPR023753: FAD/NAD(P)-binding domain	GO:0016491 MF: oxidoreductase activity;GO:0016668 MF: oxidoreductase activity, acting on a sulfur group of donors, NAD(P) as acceptor;GO:0045454 BP: cell redox homeostasis;GO:0050660 MF: flavin adenine dinucleotide binding;GO:0055114 BP: oxidation-reduction process	G	PF07992; PF02852	IPR004099; IPR012999; IPR016156; IPR023753	GO:0016491; GO:0016668; GO:0045454; GO:0050660; GO:0055114
TraesCS2B02G350500.1	1	***	tr|A0A1D5U3B7|A0A1D5U3B7_WHEAT	ATP-dependent 6-phosphofructokinase	PF00365: Phosphofructokinase	IPR000023: Phosphofructokinase domain; IPR012004: Pyrophosphate-dependent phosphofructokinase TP0108-type; IPR022953: ATP-dependent 6-phosphofructokinase	GO:0003872 MF: 6-phosphofructokinase activity;GO:0005524 MF: ATP binding;GO:0006002 BP: fructose 6-phosphate metabolic process;GO:0006096 BP: glycolytic process	G	PF00365	IPR000023; IPR012004; IPR022953	GO:0003872; GO:0005524; GO:0006002; GO:0006096
TraesCS4A02G111700.1	1	***	tr|G1FER0|G1FER0_CAMSI	Ubiquitin activating enzyme E1	PF00899: ThiF family; PF16190: Ubiquitin-activating enzyme E1 FCCH domain; PF16191: Ubiquitin-activating enzyme E1 four-helix bundle; PF10585: Ubiquitin-activating enzyme active site; PF09358: Ubiquitin fold domain	IPR000011: Ubiquitin/SUMO-activating enzyme E1; IPR000594: THIF-type NAD/FAD binding fold; IPR018074: Ubiquitin-activating enzyme E1, conserved site; IPR018075: Ubiquitin-activating enzyme E1; IPR018965: Ubiquitin-activating enzyme E1, C-terminal; IPR019572: Ubiquitin-activating enzyme, catalytic cysteine domain; IPR032418: Ubiquitin-activating enzyme E1, FCCH domain; IPR032420: Ubiquitin-activat…	GO:0006464 BP: cellular protein modification process;GO:0008641 MF: small protein activating enzyme activity	G	PF00899; PF16190; PF16191; PF10585; PF09358	IPR000011; IPR000594; IPR018074; IPR018075; IPR018965; IPR019572; IPR032418; IPR032420; IPR033127	GO:0006464; GO:0008641
TraesCS4A02G111700.2	0	***	tr|G1FER0|G1FER0_CAMSI	Ubiquitin activating enzyme E1	PF00899: ThiF family; PF16190: Ubiquitin-activating enzyme E1 FCCH domain; PF16191: Ubiquitin-activating enzyme E1 four-helix bundle; PF10585: Ubiquitin-activating enzyme active site; PF09358: Ubiquitin fold domain	IPR000011: Ubiquitin/SUMO-activating enzyme E1; IPR000594: THIF-type NAD/FAD binding fold; IPR018074: Ubiquitin-activating enzyme E1, conserved site; IPR018075: Ubiquitin-activating enzyme E1; IPR018965: Ubiquitin-activating enzyme E1, C-terminal; IPR019572: Ubiquitin-activating enzyme, catalytic cysteine domain; IPR032418: Ubiquitin-activating enzyme E1, FCCH domain; IPR032420: Ubiquitin-activat…	GO:0006464 BP: cellular protein modification process;GO:0008641 MF: small protein activating enzyme activity	G	PF00899; PF16190; PF16191; PF10585; PF09358	IPR000011; IPR000594; IPR018074; IPR018075; IPR018965; IPR019572; IPR032418; IPR032420; IPR033127	GO:0006464; GO:0008641
TraesCS6A02G392300.1	1	***	tr|B9HPG4|B9HPG4_POPTR	Telomere-binding family protein	PF00249: Myb-like DNA-binding domain	IPR000626: Ubiquitin domain; IPR001005: SANT/Myb domain; IPR009057: Homeobox domain-like; IPR017930: Myb domain; IPR029071: Ubiquitin-related domain	GO:0003677 MF: DNA binding;GO:0005515 MF: protein binding	G	PF00249	IPR000626; IPR001005; IPR009057; IPR017930; IPR029071	GO:0003677; GO:0005515
TraesCS6A02G392300.2	0	***	tr|B9HPG4|B9HPG4_POPTR	Telomere-binding family protein		IPR000626: Ubiquitin domain; IPR029071: Ubiquitin-related domain	GO:0005515 MF: protein binding	G		IPR000626; IPR029071	GO:0005515
TraesCS2B02G435600.1	1	***	tr|G7IVT3|G7IVT3_MEDTR	NBS-LRR disease resistance protein	PF00931: NB-ARC domain	IPR002182: NB-ARC; IPR003593: AAA+ ATPase domain; IPR011991: Winged helix-turn-helix DNA-binding domain; IPR027417: P-loop containing nucleoside triphosphate hydrolase; IPR032675: Leucine-rich repeat domain, L domain-like	GO:0043531 MF: ADP binding	G	PF00931	IPR002182; IPR003593; IPR011991; IPR027417; IPR032675	GO:0043531
TraesCS6B02G421700.1	1	***	tr|A0A1D6AMI4|A0A1D6AMI4_WHEAT	Bidirectional sugar transporter SWEET	PF03083: Sugar efflux transporter for intercellular exchange	IPR004316: SWEET sugar transporter	GO:0016021 CC: integral component of membrane	G	PF03083	IPR004316	GO:0016021
TraesCS4A02G410300.1	1	***	tr|M8BC00|M8BC00_AEGTA	Mitochondrial import inner membrane translocase subunit TIM22	PF02466: Tim17/Tim22/Tim23/Pmp24 family	IPR003397: Mitochondrial inner membrane translocase subunit Tim17/Tim22/Tim23/peroxisomal protein PMP24		G	PF02466	IPR003397
TraesCS1A02G424300.2	0	***	tr|B6TCZ2|B6TCZ2_MAIZE	Protein ABIL1				G
TraesCS1A02G424300.1	1	***	tr|B6TCZ2|B6TCZ2_MAIZE	Protein ABIL1				G
TraesCS2D02G573500.1	1	*-*	tr|A7UMA9|A7UMA9_WHEAT	CsAtPR5				G
TraesCS6A02G228500.4	0	***	tr|B9GR98|B9GR98_POPTR	CLIP-associating family protein	PF02985: HEAT repeat; PF12348: CLASP N terminal	IPR000357: HEAT repeat; IPR011989: Armadillo-like helical; IPR016024: Armadillo-type fold; IPR021133: HEAT, type 2; IPR024395: CLASP N-terminal domain; IPR034085: TOG domain	GO:0005488 MF: binding;GO:0005515 MF: protein binding	G	PF02985; PF12348	IPR000357; IPR011989; IPR016024; IPR021133; IPR024395; IPR034085	GO:0005488; GO:0005515
TraesCS6A02G228500.5	0	***	tr|B9GR98|B9GR98_POPTR	CLIP-associating family protein	PF02985: HEAT repeat; PF12348: CLASP N terminal	IPR000357: HEAT repeat; IPR011989: Armadillo-like helical; IPR016024: Armadillo-type fold; IPR021133: HEAT, type 2; IPR024395: CLASP N-terminal domain; IPR034085: TOG domain	GO:0005488 MF: binding;GO:0005515 MF: protein binding	G	PF02985; PF12348	IPR000357; IPR011989; IPR016024; IPR021133; IPR024395; IPR034085	GO:0005488; GO:0005515
TraesCS2B02G410600.1	1	*-*	tr|B9SKK4|B9SKK4_RICCO	ELMO domain-containing protein, putative	PF04727: ELMO/CED-12 family	IPR006816: ELMO domain; IPR012674: Calycin		G	PF04727	IPR006816; IPR012674
TraesCS6A02G408400.1	1	--*	tr|A0A0B0NNB6|A0A0B0NNB6_GOSAR	Photosystem II 22 kDa, chloroplastic		IPR023329: Chlorophyll a/b binding protein domain		G		IPR023329
TraesCS2A02G414800.1	1	***	tr|A0A061EB20|A0A061EB20_THECC	Argonaute family protein	PF16486: N-terminal domain of argonaute; PF08699: Argonaute linker 1 domain; PF02170: PAZ domain; PF16488: Argonaute linker 2 domain; PF02171: Piwi domain	IPR003100: PAZ domain; IPR003165: Piwi domain; IPR012337: Ribonuclease H-like domain; IPR014811: Argonaute, linker 1 domain; IPR032472: Argonaute linker 2 domain; IPR032474: Protein argonaute, N-terminal	GO:0003676 MF: nucleic acid binding;GO:0005515 MF: protein binding	G	PF16486; PF08699; PF02170; PF16488; PF02171	IPR003100; IPR003165; IPR012337; IPR014811; IPR032472; IPR032474	GO:0003676; GO:0005515
TraesCS4A02G291600.3	0	***	tr|A0A1E5VJC9|A0A1E5VJC9_9POAL	DUF21 domain-containing protein	PF01595: Domain of unknown function DUF21	IPR000644: CBS domain; IPR002550: Domain of unknown function DUF21		G	PF01595	IPR000644; IPR002550
TraesCS7D02G447100.1	1	***	tr|A0A097PNZ0|A0A097PNZ0_BRADI	RNA polymerase II transcription mediator	PF10156: Subunit 17 of Mediator complex	IPR019313: Mediator complex, subunit Med17	GO:0001104 MF: RNA polymerase II transcription cofactor activity;GO:0006357 BP: regulation of transcription from RNA polymerase II promoter;GO:0016592 CC: mediator complex	G	PF10156	IPR019313	GO:0001104; GO:0006357; GO:0016592
TraesCS7B02G067000.1	1	***	tr|A0A1D6CIT1|A0A1D6CIT1_WHEAT	Aldose 1-epimerase	PF01263: Aldose 1-epimerase	IPR008183: Aldose 1-/Glucose-6-phosphate 1-epimerase; IPR011013: Galactose mutarotase-like domain; IPR014718: Glycoside hydrolase-type carbohydrate-binding; IPR015443: Aldose 1-epimerase	GO:0003824 MF: catalytic activity;GO:0005975 BP: carbohydrate metabolic process;GO:0016853 MF: isomerase activity;GO:0019318 BP: hexose metabolic process;GO:0030246 MF: carbohydrate binding	G	PF01263	IPR008183; IPR011013; IPR014718; IPR015443	GO:0003824; GO:0005975; GO:0016853; GO:0019318; GO:0030246
TraesCS1B02G295600.1	1	***	tr|E0ZCQ4|E0ZCQ4_PICSI	Ras-related protein-like protein	PF00071: Ras family	IPR001806: Small GTPase superfamily; IPR005225: Small GTP-binding protein domain; IPR027417: P-loop containing nucleoside triphosphate hydrolase	GO:0003924 MF: GTPase activity;GO:0005525 MF: GTP binding	G	PF00071	IPR001806; IPR005225; IPR027417	GO:0003924; GO:0005525
TraesCS2B02G434300.1	1	*-*	AT5G07580.1	ethylene-responsive transcription factor	PF00847: AP2 domain	IPR001471: AP2/ERF domain; IPR016177: DNA-binding domain	GO:0003677 MF: DNA binding;GO:0003700 MF: transcription factor activity, sequence-specific DNA binding;GO:0006355 BP: regulation of transcription, DNA-templated	G	PF00847	IPR001471; IPR016177	GO:0003677; GO:0003700; GO:0006355
TraesCS4A02G291600.2	0	***	tr|A0A1E5VJC9|A0A1E5VJC9_9POAL	DUF21 domain-containing protein	PF01595: Domain of unknown function DUF21	IPR000644: CBS domain; IPR002550: Domain of unknown function DUF21		G	PF01595	IPR000644; IPR002550
TraesCS3B02G245100.1	0	***	tr|I1HP46|I1HP46_BRADI	Serine/threonine-protein phosphatase 2A 55 kDa regulatory subunit B	PF00400: WD domain, G-beta repeat	IPR000009: Protein phosphatase 2A regulatory subunit PR55; IPR001680: WD40 repeat; IPR015943: WD40/YVTN repeat-like-containing domain; IPR017986: WD40-repeat-containing domain; IPR018067: Protein phosphatase 2A regulatory subunit PR55, conserved site; IPR019775: WD40 repeat, conserved site	GO:0000159 CC: protein phosphatase type 2A complex;GO:0005515 MF: protein binding;GO:0019888 MF: protein phosphatase regulator activity	G	PF00400	IPR000009; IPR001680; IPR015943; IPR017986; IPR018067; IPR019775	GO:0000159; GO:0005515; GO:0019888
TraesCS3B02G245100.2	1	***	tr|A0A0Q3KCB6|A0A0Q3KCB6_BRADI	Serine/threonine-protein phosphatase 2A 55 kDa regulatory subunit B	PF00400: WD domain, G-beta repeat	IPR000009: Protein phosphatase 2A regulatory subunit PR55; IPR001680: WD40 repeat; IPR015943: WD40/YVTN repeat-like-containing domain; IPR017986: WD40-repeat-containing domain; IPR018067: Protein phosphatase 2A regulatory subunit PR55, conserved site; IPR019775: WD40 repeat, conserved site	GO:0000159 CC: protein phosphatase type 2A complex;GO:0005515 MF: protein binding;GO:0019888 MF: protein phosphatase regulator activity	G	PF00400	IPR000009; IPR001680; IPR015943; IPR017986; IPR018067; IPR019775	GO:0000159; GO:0005515; GO:0019888
TraesCS4B02G227400.1	1	***	tr|A0A1D1Z0D1|A0A1D1Z0D1_9ARAE	Subtilisin-like protease	PF05922: Peptidase inhibitor I9; PF00082: Subtilase family; PF02225: PA domain	IPR000209: Peptidase S8/S53 domain; IPR003137: PA domain; IPR010259: Peptidase S8 propeptide/proteinase inhibitor I9; IPR015500: Peptidase S8, subtilisin-related; IPR023828: Peptidase S8, subtilisin, Ser-active site	GO:0004252 MF: serine-type endopeptidase activity;GO:0006508 BP: proteolysis	G	PF05922; PF00082; PF02225	IPR000209; IPR003137; IPR010259; IPR015500; IPR023828	GO:0004252; GO:0006508
TraesCS4B02G083800.1	1	***	tr|G7I4C6|G7I4C6_MEDTR	Diphthamide biosynthesis protein	PF01866: Putative diphthamide synthesis protein	IPR016435: Diphthamide synthesis DPH1/DPH2		G	PF01866	IPR016435
TraesCS7A02G537100.1	1	***	tr|G7K3R3|G7K3R3_MEDTR	12-oxophytodienoate reductase-like protein	PF00724: NADH:flavin oxidoreductase / NADH oxidase family	IPR001155: NADH:flavin oxidoreductase/NADH oxidase, N-terminal; IPR013785: Aldolase-type TIM barrel	GO:0003824 MF: catalytic activity;GO:0010181 MF: FMN binding;GO:0016491 MF: oxidoreductase activity;GO:0055114 BP: oxidation-reduction process	G	PF00724	IPR001155; IPR013785	GO:0003824; GO:0010181; GO:0016491; GO:0055114
TraesCS5D02G203900.1	1	*-*	sp|Q6CBQ8|RCF1_YARLI	Respiratory supercomplex factor 1, mitochondrial	PF04588: Hypoxia induced protein conserved region	IPR007667: Hypoxia induced protein, domain		G	PF04588	IPR007667
TraesCS7A02G370500.4	0	***	tr|A0A199VLM4|A0A199VLM4_ANACO	3-hydroxyisobutyryl-CoA hydrolase-like protein 3, mitochondrial	PF16113: Enoyl-CoA hydratase/isomerase	IPR029045: ClpP/crotonase-like domain; IPR032259: Enoyl-CoA hydratase/isomerase, HIBYL-CoA-H type	GO:0003860 MF: 3-hydroxyisobutyryl-CoA hydrolase activity	G	PF16113	IPR029045; IPR032259	GO:0003860
TraesCS2A02G384900.1	1	***	tr|M7YMG3|M7YMG3_TRIUA	Protein BREAST CANCER SUSCEPTIBILITY 1-like protein	PF13771: PHD-like zinc-binding domain; PF00533: BRCA1 C Terminus (BRCT) domain	IPR001357: BRCT domain; IPR001841: Zinc finger, RING-type; IPR013083: Zinc finger, RING/FYVE/PHD-type; IPR034732: Extended PHD (ePHD) domain	GO:0005515 MF: protein binding;GO:0008270 MF: zinc ion binding	G	PF13771; PF00533	IPR001357; IPR001841; IPR013083; IPR034732	GO:0005515; GO:0008270
TraesCS3D02G425500.2	0	***	tr|A0A059Q2R4|A0A059Q2R4_9POAL	Disease resistance protein	PF00931: NB-ARC domain	IPR002182: NB-ARC; IPR011991: Winged helix-turn-helix DNA-binding domain; IPR027417: P-loop containing nucleoside triphosphate hydrolase; IPR032675: Leucine-rich repeat domain, L domain-like	GO:0043531 MF: ADP binding	G	PF00931	IPR002182; IPR011991; IPR027417; IPR032675	GO:0043531
TraesCS7A02G214200.1	0	***	tr|M8AL49|M8AL49_TRIUA	DNA repair protein complementing XP-C cells-like protein	PF03835: Rad4 transglutaminase-like domain; PF10403: Rad4 beta-hairpin domain 1; PF10404: Rad4 beta-hairpin domain 2; PF10405: Rad4 beta-hairpin domain 3	IPR018325: Rad4/PNGase transglutaminase-like fold; IPR018326: Rad4 beta-hairpin domain 1; IPR018327: Rad4 beta-hairpin domain 2; IPR018328: Rad4 beta-hairpin domain 3	GO:0003677 MF: DNA binding	G	PF03835; PF10403; PF10404; PF10405	IPR018325; IPR018326; IPR018327; IPR018328	GO:0003677
TraesCS1D02G205700.1	1	***	tr|Q336W3|Q336W3_ORYSJ	Protein phosphatase 2C containing protein, expressed	PF00481: Protein phosphatase 2C	IPR000222: PPM-type phosphatase, divalent cation binding; IPR001932: PPM-type phosphatase domain	GO:0003824 MF: catalytic activity;GO:0043169 MF: cation binding	G	PF00481	IPR000222; IPR001932	GO:0003824; GO:0043169
TraesCS7A02G214200.2	0	***	tr|M8AL49|M8AL49_TRIUA	DNA repair protein complementing XP-C cells-like protein	PF03835: Rad4 transglutaminase-like domain; PF10403: Rad4 beta-hairpin domain 1; PF10404: Rad4 beta-hairpin domain 2; PF10405: Rad4 beta-hairpin domain 3	IPR018325: Rad4/PNGase transglutaminase-like fold; IPR018326: Rad4 beta-hairpin domain 1; IPR018327: Rad4 beta-hairpin domain 2; IPR018328: Rad4 beta-hairpin domain 3	GO:0003677 MF: DNA binding	G	PF03835; PF10403; PF10404; PF10405	IPR018325; IPR018326; IPR018327; IPR018328	GO:0003677
TraesCS4A02G102500.1	1	***	AT2G37370.3	centrosomal protein of 135 kDa-like protein				G
TraesCS2A02G104800.1	1	***	tr|A0A191XX69|A0A191XX69_WHEAT	WRKY transcription factor	PF03106: WRKY DNA -binding domain	IPR003657: WRKY domain	GO:0003700 MF: transcription factor activity, sequence-specific DNA binding;GO:0006355 BP: regulation of transcription, DNA-templated;GO:0043565 MF: sequence-specific DNA binding	G	PF03106	IPR003657	GO:0003700; GO:0006355; GO:0043565
TraesCS1D02G413100.1	1	***	tr|A0A160NTK3|A0A160NTK3_9LAMI	RADIALIS-like transcription factor	PF00249: Myb-like DNA-binding domain	IPR001005: SANT/Myb domain; IPR009057: Homeobox domain-like	GO:0003677 MF: DNA binding	G	PF00249	IPR001005; IPR009057	GO:0003677
TraesCS7D02G515100.1	1	***	tr|B6TWV8|B6TWV8_MAIZE	MYB transcription factor	PF00249: Myb-like DNA-binding domain	IPR001005: SANT/Myb domain; IPR009057: Homeobox domain-like; IPR017930: Myb domain	GO:0003677 MF: DNA binding	G	PF00249	IPR001005; IPR009057; IPR017930	GO:0003677
TraesCS3A02G502200.1	1	***	tr|A0A1D5V9T3|A0A1D5V9T3_WHEAT	Phosphatidylserine decarboxylase proenzyme 2	PF00168: C2 domain; PF13833: EF-hand domain pair; PF02666: Phosphatidylserine decarboxylase	IPR000008: C2 domain; IPR002048: EF-hand domain; IPR003817: Phosphatidylserine decarboxylase-related; IPR011992: EF-hand domain pair; IPR018247: EF-Hand 1, calcium-binding site; IPR033177: Phosphatidylserine decarboxylase; IPR033179: Phosphatidylserine decarboxylase, prokaryotic type 2	GO:0004609 MF: phosphatidylserine decarboxylase activity;GO:0005509 MF: calcium ion binding;GO:0005515 MF: protein binding;GO:0008654 BP: phospholipid biosynthetic process	G	PF00168; PF13833; PF02666	IPR000008; IPR002048; IPR003817; IPR011992; IPR018247; IPR033177; IPR033179	GO:0004609; GO:0005509; GO:0005515; GO:0008654
TraesCS3A02G294300.1	1	***	AT2G34510.1	choice-of-anchor C domain protein, putative (Protein of unknown function, DUF642)	PF04862: Protein of unknown function (DUF642)	IPR006946: Domain of unknown function DUF642; IPR008979: Galactose-binding domain-like		U	PF04862	IPR006946; IPR008979
TraesCS2D02G057900.1	1	***	tr|A0A1D1Z8J9|A0A1D1Z8J9_9ARAE	Chaperone protein DnaJ		IPR001305: Heat shock protein DnaJ, cysteine-rich domain	GO:0031072 MF: heat shock protein binding;GO:0051082 MF: unfolded protein binding	G		IPR001305	GO:0031072; GO:0051082
TraesCS1B02G287200.1	1	***	tr|B6T5A7|B6T5A7_MAIZE	Pleckstrin homology domain-containing protein 1	PF00169: PH domain	IPR001849: Pleckstrin homology domain; IPR011993: PH domain-like		G	PF00169	IPR001849; IPR011993
TraesCS1D02G123900.1	1	***	tr|A0A1D5SMX9|A0A1D5SMX9_WHEAT	Derlin	PF04511: Der1-like family	IPR022764: Peptidase S54, rhomboid domain	GO:0004252 MF: serine-type endopeptidase activity;GO:0016021 CC: integral component of membrane	G	PF04511	IPR022764	GO:0004252; GO:0016021
TraesCS1D02G123900.2	0	***	tr|W5AMB4|W5AMB4_WHEAT	Derlin	PF04511: Der1-like family	IPR022764: Peptidase S54, rhomboid domain	GO:0004252 MF: serine-type endopeptidase activity;GO:0016021 CC: integral component of membrane	G	PF04511	IPR022764	GO:0004252; GO:0016021
TraesCS3D02G241300.1	1	***	tr|A0A1E5VS12|A0A1E5VS12_9POAL	Mannan endo-1,4-beta-mannosidase 1	PF00150: Cellulase (glycosyl hydrolase family 5)	IPR001547: Glycoside hydrolase, family 5; IPR017853: Glycoside hydrolase superfamily; IPR018087: Glycoside hydrolase, family 5, conserved site	GO:0004553 MF: hydrolase activity, hydrolyzing O-glycosyl compounds;GO:0005975 BP: carbohydrate metabolic process	G	PF00150	IPR001547; IPR017853; IPR018087	GO:0004553; GO:0005975
TraesCS3D02G241300.2	0	***	tr|A0A1E5VS12|A0A1E5VS12_9POAL	Mannan endo-1,4-beta-mannosidase 1	PF00150: Cellulase (glycosyl hydrolase family 5)	IPR001547: Glycoside hydrolase, family 5; IPR017853: Glycoside hydrolase superfamily; IPR018087: Glycoside hydrolase, family 5, conserved site	GO:0004553 MF: hydrolase activity, hydrolyzing O-glycosyl compounds;GO:0005975 BP: carbohydrate metabolic process	G	PF00150	IPR001547; IPR017853; IPR018087	GO:0004553; GO:0005975
TraesCS3B02G364500.1	1	***	tr|A0A061EQW9|A0A061EQW9_THECC	Receptor lectin kinase	PF00139: Legume lectin domain; PF00069: Protein kinase domain	IPR000719: Protein kinase domain; IPR001220: Legume lectin domain; IPR008271: Serine/threonine-protein kinase, active site; IPR011009: Protein kinase-like domain; IPR013320: Concanavalin A-like lectin/glucanase domain; IPR017441: Protein kinase, ATP binding site; IPR019825: Legume lectin, beta chain, Mn/Ca-binding site	GO:0004672 MF: protein kinase activity;GO:0005524 MF: ATP binding;GO:0006468 BP: protein phosphorylation;GO:0030246 MF: carbohydrate binding	G	PF00139; PF00069	IPR000719; IPR001220; IPR008271; IPR011009; IPR013320; IPR017441; IPR019825	GO:0004672; GO:0005524; GO:0006468; GO:0030246
TraesCS2B02G406800.1	1	***	tr|B8BFH1|B8BFH1_ORYSI	Formin-like protein	PF10409: C2 domain of PTEN tumour-suppressor protein; PF02181: Formin Homology 2 Domain	IPR000008: C2 domain; IPR014020: Tensin phosphatase, C2 domain; IPR015425: Formin, FH2 domain; IPR029021: Protein-tyrosine phosphatase-like; IPR029023: Tensin-type phosphatase domain	GO:0005515 MF: protein binding	G	PF10409; PF02181	IPR000008; IPR014020; IPR015425; IPR029021; IPR029023	GO:0005515
TraesCS7A02G446700.1	1	***	tr|I3SGW1|I3SGW1_MEDTR	Lipid transfer protein	PF14368: Probable lipid transfer	IPR016140: Bifunctional inhibitor/plant lipid transfer protein/seed storage helical domain		G	PF14368	IPR016140
TraesCS3D02G224300.1	1	***	tr|B6TA80|B6TA80_MAIZE	Thaumatin-like protein	PF00314: Thaumatin family	IPR001938: Thaumatin		G	PF00314	IPR001938
TraesCS3B02G515200.1	1	***	tr|R7W0U4|R7W0U4_AEGTA	Basic 7S globulin 2	PF14543: Xylanase inhibitor N-terminal; PF14541: Xylanase inhibitor C-terminal	IPR021109: Aspartic peptidase domain; IPR032799: Xylanase inhibitor, C-terminal; IPR032861: Xylanase inhibitor, N-terminal; IPR033121: Peptidase family A1 domain		G	PF14543; PF14541	IPR021109; IPR032799; IPR032861; IPR033121
TraesCS4A02G081100.1	1	***	tr|F2D218|F2D218_HORVV	V-type proton ATPase subunit a	PF01496: V-type ATPase 116kDa subunit family	IPR002490: V-type ATPase, V0 complex, 116kDa subunit family; IPR026028: ATPase, V0 complex, subunit 116kDa, eukaryotic	GO:0000220 CC: vacuolar proton-transporting V-type ATPase, V0 domain;GO:0015078 MF: hydrogen ion transmembrane transporter activity;GO:0015991 BP: ATP hydrolysis coupled proton transport;GO:0033179 CC: proton-transporting V-type ATPase, V0 domain	G	PF01496	IPR002490; IPR026028	GO:0000220; GO:0015078; GO:0015991; GO:0033179
TraesCS2D02G597600.1	1	***	tr|A0A0K9P7S9|A0A0K9P7S9_ZOSMR	Kinase family protein	PF07714: Protein tyrosine kinase	IPR000719: Protein kinase domain; IPR001245: Serine-threonine/tyrosine-protein kinase, catalytic domain; IPR011009: Protein kinase-like domain; IPR011990: Tetratricopeptide-like helical domain	GO:0004672 MF: protein kinase activity;GO:0005515 MF: protein binding;GO:0005524 MF: ATP binding;GO:0006468 BP: protein phosphorylation	G	PF07714	IPR000719; IPR001245; IPR011009; IPR011990	GO:0004672; GO:0005515; GO:0005524; GO:0006468
TraesCS4A02G081100.2	0	***	tr|F2D218|F2D218_HORVV	V-type proton ATPase subunit a	PF01496: V-type ATPase 116kDa subunit family	IPR002490: V-type ATPase, V0 complex, 116kDa subunit family	GO:0015078 MF: hydrogen ion transmembrane transporter activity;GO:0015991 BP: ATP hydrolysis coupled proton transport;GO:0033179 CC: proton-transporting V-type ATPase, V0 domain	G	PF01496	IPR002490	GO:0015078; GO:0015991; GO:0033179
TraesCS7D02G294800.1	0	***	tr|A0A1E5UV76|A0A1E5UV76_9POAL	Tobamovirus multiplication protein 2A	PF00335: Tetraspanin family	IPR018499: Tetraspanin/Peripherin	GO:0016021 CC: integral component of membrane	G	PF00335	IPR018499	GO:0016021
TraesCS7D02G294800.2	1	***	tr|A0A1E5UV76|A0A1E5UV76_9POAL	Tobamovirus multiplication protein 2A	PF00335: Tetraspanin family	IPR018499: Tetraspanin/Peripherin	GO:0016021 CC: integral component of membrane	G	PF00335	IPR018499	GO:0016021
TraesCS2B02G173500.1	1	***	tr|W5BMF3|W5BMF3_WHEAT	Peroxidase	PF00141: Peroxidase	IPR000823: Plant peroxidase; IPR002016: Haem peroxidase, plant/fungal/bacterial; IPR010255: Haem peroxidase; IPR019793: Peroxidases heam-ligand binding site; IPR019794: Peroxidase, active site	GO:0004601 MF: peroxidase activity;GO:0006979 BP: response to oxidative stress;GO:0020037 MF: heme binding;GO:0055114 BP: oxidation-reduction process	G	PF00141	IPR000823; IPR002016; IPR010255; IPR019793; IPR019794	GO:0004601; GO:0006979; GO:0020037; GO:0055114
TraesCS2D02G505400.1	1	***	tr|G7JD52|G7JD52_MEDTR	Receptor-like kinase	PF07714: Protein tyrosine kinase	IPR000719: Protein kinase domain; IPR001245: Serine-threonine/tyrosine-protein kinase, catalytic domain; IPR008271: Serine/threonine-protein kinase, active site; IPR011009: Protein kinase-like domain; IPR017441: Protein kinase, ATP binding site	GO:0004672 MF: protein kinase activity;GO:0005524 MF: ATP binding;GO:0006468 BP: protein phosphorylation	G	PF07714	IPR000719; IPR001245; IPR008271; IPR011009; IPR017441	GO:0004672; GO:0005524; GO:0006468
TraesCS3A02G342500.2	0	***	tr|G9HVM6|G9HVM6_CAMSI	Ubiquitin-conjugating enzyme E2	PF00179: Ubiquitin-conjugating enzyme	IPR000608: Ubiquitin-conjugating enzyme E2; IPR016135: Ubiquitin-conjugating enzyme/RWD-like; IPR023313: Ubiquitin-conjugating enzyme, active site		G	PF00179	IPR000608; IPR016135; IPR023313
TraesCS3A02G342500.1	1	***	tr|G9HVM6|G9HVM6_CAMSI	Ubiquitin-conjugating enzyme E2	PF00179: Ubiquitin-conjugating enzyme	IPR000608: Ubiquitin-conjugating enzyme E2; IPR016135: Ubiquitin-conjugating enzyme/RWD-like; IPR023313: Ubiquitin-conjugating enzyme, active site		G	PF00179	IPR000608; IPR016135; IPR023313
TraesCS4D02G273200.2	0	***	tr|F4JDC3|F4JDC3_ARATH	Evolutionarily conserved C-terminal region 2	PF04146: YT521-B-like domain	IPR007275: YTH domain	GO:0003723 MF: RNA binding	G	PF04146	IPR007275	GO:0003723
TraesCS4D02G025400.1	1	***	tr|M8AS95|M8AS95_AEGTA	Exostosin-2	PF09258: Glycosyl transferase family 64 domain	IPR015338: Exostosin , C-terminal; IPR023296: Glycosyl hydrolase, five-bladed beta-propellor domain; IPR029044: Nucleotide-diphospho-sugar transferases	GO:0006024 BP: glycosaminoglycan biosynthetic process;GO:0015012 BP: heparan sulfate proteoglycan biosynthetic process;GO:0016021 CC: integral component of membrane	G	PF09258	IPR015338; IPR023296; IPR029044	GO:0006024; GO:0015012; GO:0016021
TraesCS2B02G209200.1	1	***	tr|B9SVK5|B9SVK5_RICCO	WRKY transcription factor, putative	PF03106: WRKY DNA -binding domain	IPR003657: WRKY domain	GO:0003700 MF: transcription factor activity, sequence-specific DNA binding;GO:0006355 BP: regulation of transcription, DNA-templated;GO:0043565 MF: sequence-specific DNA binding	G	PF03106	IPR003657	GO:0003700; GO:0006355; GO:0043565
TraesCS5A02G393800.1	1	***	tr|A0A199UE38|A0A199UE38_ANACO	Protein Asterix	PF03669: Uncharacterised protein family (UPF0139)	IPR005351: Uncharacterised protein family UPF0139		G	PF03669	IPR005351
TraesCS4D02G273200.3	0	***	tr|F4JDC3|F4JDC3_ARATH	Evolutionarily conserved C-terminal region 2	PF04146: YT521-B-like domain	IPR007275: YTH domain	GO:0003723 MF: RNA binding	G	PF04146	IPR007275	GO:0003723
TraesCS6D02G176300.3	1	***	tr|Q8S1A3|Q8S1A3_ORYSJ	Mitochondrial carrier protein-like	PF00153: Mitochondrial carrier protein	IPR002067: Mitochondrial carrier protein; IPR002167: Graves disease carrier protein; IPR018108: Mitochondrial substrate/solute carrier; IPR023395: Mitochondrial carrier domain	GO:0005743 CC: mitochondrial inner membrane;GO:0055085 BP: transmembrane transport	G	PF00153	IPR002067; IPR002167; IPR018108; IPR023395	GO:0005743; GO:0055085
TraesCS6D02G176300.2	0	***	tr|Q8S1A3|Q8S1A3_ORYSJ	Mitochondrial carrier protein-like	PF00153: Mitochondrial carrier protein	IPR002067: Mitochondrial carrier protein; IPR002167: Graves disease carrier protein; IPR018108: Mitochondrial substrate/solute carrier; IPR023395: Mitochondrial carrier domain	GO:0005743 CC: mitochondrial inner membrane;GO:0055085 BP: transmembrane transport	G	PF00153	IPR002067; IPR002167; IPR018108; IPR023395	GO:0005743; GO:0055085
TraesCS6D02G176300.1	0	***	tr|Q8S1A3|Q8S1A3_ORYSJ	Mitochondrial carrier protein-like	PF00153: Mitochondrial carrier protein	IPR002067: Mitochondrial carrier protein; IPR002167: Graves disease carrier protein; IPR018108: Mitochondrial substrate/solute carrier; IPR023395: Mitochondrial carrier domain	GO:0005743 CC: mitochondrial inner membrane;GO:0055085 BP: transmembrane transport	G	PF00153	IPR002067; IPR002167; IPR018108; IPR023395	GO:0005743; GO:0055085
TraesCS4A02G021600.1	1	*-*	tr|A0A1I9LSB9|A0A1I9LSB9_ARATH	Alba DNA/RNA-binding protein	PF01918: Alba	IPR002775: DNA/RNA-binding protein Alba-like	GO:0003676 MF: nucleic acid binding	G	PF01918	IPR002775	GO:0003676
TraesCS4A02G021600.2	0	*-*	tr|A0A1I9LSB9|A0A1I9LSB9_ARATH	Alba DNA/RNA-binding protein	PF01918: Alba	IPR002775: DNA/RNA-binding protein Alba-like	GO:0003676 MF: nucleic acid binding	G	PF01918	IPR002775	GO:0003676
TraesCS6D02G176300.4	0	***	tr|Q8S1A3|Q8S1A3_ORYSJ	Mitochondrial carrier protein-like	PF00153: Mitochondrial carrier protein	IPR002067: Mitochondrial carrier protein; IPR018108: Mitochondrial substrate/solute carrier; IPR023395: Mitochondrial carrier domain	GO:0055085 BP: transmembrane transport	G	PF00153	IPR002067; IPR018108; IPR023395	GO:0055085
TraesCS3D02G387200.1	1	***	tr|A0A072TTN1|A0A072TTN1_MEDTR	Multidrug resistance protein ABC transporter family protein	PF00664: ABC transporter transmembrane region; PF00005: ABC transporter	IPR003439: ABC transporter-like; IPR003593: AAA+ ATPase domain; IPR011527: ABC transporter type 1, transmembrane domain; IPR017871: ABC transporter, conserved site; IPR027417: P-loop containing nucleoside triphosphate hydrolase	GO:0005524 MF: ATP binding;GO:0006810 BP: transport;GO:0016021 CC: integral component of membrane;GO:0016887 MF: ATPase activity;GO:0042626 MF: ATPase activity, coupled to transmembrane movement of substances;GO:0055085 BP: transmembrane transport	G	PF00664; PF00005	IPR003439; IPR003593; IPR011527; IPR017871; IPR027417	GO:0005524; GO:0006810; GO:0016021; GO:0016887; GO:0042626; GO:0055085
TraesCS3B02G370200.1	0	***	tr|W5D5I3|W5D5I3_WHEAT	Cysteine synthase	PF00291: Pyridoxal-phosphate dependent enzyme	IPR001216: Cysteine synthase/cystathionine beta-synthase, pyridoxal-phosphate attachment site; IPR001926: Tryptophan synthase beta subunit-like PLP-dependent enzyme	GO:0006535 BP: cysteine biosynthetic process from serine	G	PF00291	IPR001216; IPR001926	GO:0006535
TraesCS4D02G143500.1	1	***	tr|M8CTN8|M8CTN8_AEGTA	Pentatricopeptide repeat-containing protein	PF01535: PPR repeat; PF13041: PPR repeat family; PF14432: DYW family of nucleic acid deaminases	IPR002885: Pentatricopeptide repeat; IPR011990: Tetratricopeptide-like helical domain; IPR032867: DYW domain	GO:0005515 MF: protein binding;GO:0008270 MF: zinc ion binding	G	PF01535; PF13041; PF14432	IPR002885; IPR011990; IPR032867	GO:0005515; GO:0008270
TraesCS2A02G203000.1	1	***	tr|W5BL01|W5BL01_WHEAT	Histone H4	PF15511: Centromere kinetochore component CENP-T histone fold	IPR001951: Histone H4; IPR009072: Histone-fold; IPR019809: Histone H4, conserved site	GO:0000786 CC: nucleosome;GO:0003677 MF: DNA binding;GO:0005634 CC: nucleus;GO:0006334 BP: nucleosome assembly;GO:0046982 MF: protein heterodimerization activity	G	PF15511	IPR001951; IPR009072; IPR019809	GO:0000786; GO:0003677; GO:0005634; GO:0006334; GO:0046982
TraesCS3D02G296700.1	1	***	tr|A0A0K9NQJ7|A0A0K9NQJ7_ZOSMR	Chaperone DnaK	PF00012: Hsp70 protein	IPR012725: Chaperone DnaK; IPR013126: Heat shock protein 70 family; IPR018181: Heat shock protein 70, conserved site; IPR029047: Heat shock protein 70kD, peptide-binding domain; IPR029048: Heat shock protein 70kD, C-terminal domain	GO:0005524 MF: ATP binding;GO:0006457 BP: protein folding;GO:0051082 MF: unfolded protein binding	G	PF00012	IPR012725; IPR013126; IPR018181; IPR029047; IPR029048	GO:0005524; GO:0006457; GO:0051082
TraesCS3D02G296700.2	0	***	tr|A0A103XKD2|A0A103XKD2_CYNCS	Chaperone DnaK	PF00012: Hsp70 protein	IPR013126: Heat shock protein 70 family; IPR018181: Heat shock protein 70, conserved site; IPR029047: Heat shock protein 70kD, peptide-binding domain; IPR029048: Heat shock protein 70kD, C-terminal domain		G	PF00012	IPR013126; IPR018181; IPR029047; IPR029048
TraesCS4B02G392000.1	1	*-*	tr|Q1PE83|Q1PE83_ARATH	ARM repeat superfamily protein		IPR011989: Armadillo-like helical		G		IPR011989
TraesCS3D02G418300.1	1	***	AT1G65295.1	ubiquitin carboxyl-terminal hydrolase				G
TraesCS7D02G340500.1	1	--*	tr|G7K520|G7K520_MEDTR	Lipid transfer protein	PF14368: Probable lipid transfer	IPR016140: Bifunctional inhibitor/plant lipid transfer protein/seed storage helical domain		G	PF14368	IPR016140
TraesCS3B02G370200.2	0	***	tr|A0A1D5W681|A0A1D5W681_WHEAT	Cysteine synthase	PF00291: Pyridoxal-phosphate dependent enzyme	IPR001216: Cysteine synthase/cystathionine beta-synthase, pyridoxal-phosphate attachment site; IPR001926: Tryptophan synthase beta subunit-like PLP-dependent enzyme; IPR005856: Cysteine synthase; IPR005859: Cysteine synthase CysK	GO:0004124 MF: cysteine synthase activity;GO:0006535 BP: cysteine biosynthetic process from serine	G	PF00291	IPR001216; IPR001926; IPR005856; IPR005859	GO:0004124; GO:0006535
TraesCS3D02G176900.1	1	***	tr|M8AX47|M8AX47_AEGTA	LIM domain and RING finger protein		IPR001841: Zinc finger, RING-type; IPR013087: Zinc finger C2H2-type	GO:0003676 MF: nucleic acid binding;GO:0005515 MF: protein binding;GO:0008270 MF: zinc ion binding	G		IPR001841; IPR013087	GO:0003676; GO:0005515; GO:0008270
TraesCS6B02G013700.11	0	--*	AT5G07610.1	F-box family protein	PF12937: F-box-like	IPR001810: F-box domain	GO:0005515 MF: protein binding	TE?	PF12937	IPR001810	GO:0005515
TraesCS6B02G013700.10	0	--*	AT5G07610.1	F-box family protein	PF12937: F-box-like	IPR001810: F-box domain	GO:0005515 MF: protein binding	TE?	PF12937	IPR001810	GO:0005515
TraesCS5A02G389900.1	1	*-*	tr|M8AC57|M8AC57_TRIUA	U3 small nucleolar RNA-associated protein 18-like protein	PF07893: Protein of unknown function (DUF1668)	IPR012871: Protein of unknown function DUF1677, Oryza sativa		G	PF07893	IPR012871
TraesCS7D02G150200.2	1	***	tr|M8CQK3|M8CQK3_AEGTA	Receptor-like protein kinase	PF08263: Leucine rich repeat N-terminal domain; PF00560: Leucine Rich Repeat; PF00069: Protein kinase domain	IPR000719: Protein kinase domain; IPR001611: Leucine-rich repeat; IPR003591: Leucine-rich repeat, typical subtype; IPR008271: Serine/threonine-protein kinase, active site; IPR011009: Protein kinase-like domain; IPR013210: Leucine-rich repeat-containing N-terminal, plant-type; IPR017441: Protein kinase, ATP binding site; IPR032675: Leucine-rich repeat domain, L domain-like	GO:0004672 MF: protein kinase activity;GO:0005515 MF: protein binding;GO:0005524 MF: ATP binding;GO:0006468 BP: protein phosphorylation	G	PF08263; PF00560; PF00069	IPR000719; IPR001611; IPR003591; IPR008271; IPR011009; IPR013210; IPR017441; IPR032675	GO:0004672; GO:0005515; GO:0005524; GO:0006468
TraesCS7D02G150200.1	0	***	tr|M8CQK3|M8CQK3_AEGTA	Receptor-like protein kinase	PF08263: Leucine rich repeat N-terminal domain; PF00560: Leucine Rich Repeat; PF00069: Protein kinase domain	IPR000719: Protein kinase domain; IPR001611: Leucine-rich repeat; IPR003591: Leucine-rich repeat, typical subtype; IPR008271: Serine/threonine-protein kinase, active site; IPR011009: Protein kinase-like domain; IPR013210: Leucine-rich repeat-containing N-terminal, plant-type; IPR017441: Protein kinase, ATP binding site; IPR032675: Leucine-rich repeat domain, L domain-like	GO:0004672 MF: protein kinase activity;GO:0005515 MF: protein binding;GO:0005524 MF: ATP binding;GO:0006468 BP: protein phosphorylation	G	PF08263; PF00560; PF00069	IPR000719; IPR001611; IPR003591; IPR008271; IPR011009; IPR013210; IPR017441; IPR032675	GO:0004672; GO:0005515; GO:0005524; GO:0006468
TraesCS7D02G150200.4	0	***	tr|M8CQK3|M8CQK3_AEGTA	Receptor-like protein kinase	PF08263: Leucine rich repeat N-terminal domain; PF00560: Leucine Rich Repeat; PF00069: Protein kinase domain	IPR000719: Protein kinase domain; IPR001611: Leucine-rich repeat; IPR003591: Leucine-rich repeat, typical subtype; IPR008271: Serine/threonine-protein kinase, active site; IPR011009: Protein kinase-like domain; IPR013210: Leucine-rich repeat-containing N-terminal, plant-type; IPR017441: Protein kinase, ATP binding site; IPR032675: Leucine-rich repeat domain, L domain-like	GO:0004672 MF: protein kinase activity;GO:0005515 MF: protein binding;GO:0005524 MF: ATP binding;GO:0006468 BP: protein phosphorylation	G	PF08263; PF00560; PF00069	IPR000719; IPR001611; IPR003591; IPR008271; IPR011009; IPR013210; IPR017441; IPR032675	GO:0004672; GO:0005515; GO:0005524; GO:0006468
TraesCS7A02G031100.1	1	***	tr|A0A061G3L2|A0A061G3L2_THECC	S-adenosyl-L-methionine-dependent methyltransferases superfamily protein	PF03141: Putative S-adenosyl-L-methionine-dependent methyltransferase	IPR004159: Putative S-adenosyl-L-methionine-dependent methyltransferase; IPR029063: S-adenosyl-L-methionine-dependent methyltransferase	GO:0008168 MF: methyltransferase activity	G	PF03141	IPR004159; IPR029063	GO:0008168
TraesCS1B02G476600.1	1	***	tr|G7J7N5|G7J7N5_MEDTR	ATP-dependent zinc metalloprotease FTSH protein	PF00004: ATPase family associated with various cellular activities (AAA); PF01434: Peptidase family M41	IPR000642: Peptidase M41; IPR003593: AAA+ ATPase domain; IPR003959: ATPase, AAA-type, core; IPR003960: ATPase, AAA-type, conserved site; IPR005936: Peptidase, FtsH; IPR027417: P-loop containing nucleoside triphosphate hydrolase	GO:0004222 MF: metalloendopeptidase activity;GO:0005524 MF: ATP binding;GO:0006508 BP: proteolysis;GO:0016020 CC: membrane	G	PF00004; PF01434	IPR000642; IPR003593; IPR003959; IPR003960; IPR005936; IPR027417	GO:0004222; GO:0005524; GO:0006508; GO:0016020
TraesCS5B02G544000.1	1	--*	AT1G53165.2	Protein kinase superfamily protein	PF12274: Protein of unknown function (DUF3615)	IPR022059: Protein of unknown function DUF3615		G	PF12274	IPR022059
TraesCS7A02G330100.3	0	***	tr|Q84WV3|Q84WV3_ARATH	Histone H2A deubiquitinase (DUF3755)	PF12579: Protein of unknown function (DUF3755)	IPR022228: Protein of unknown function DUF3755		G	PF12579	IPR022228
TraesCS4A02G139700.3	1	***	tr|A0A1D5XA73|A0A1D5XA73_WHEAT	ATP-dependent Clp protease proteolytic subunit	PF00574: Clp protease	IPR001907: ATP-dependent Clp protease proteolytic subunit; IPR023562: Clp protease proteolytic subunit /Translocation-enhancing protein TepA; IPR029045: ClpP/crotonase-like domain	GO:0004252 MF: serine-type endopeptidase activity;GO:0006508 BP: proteolysis	G	PF00574	IPR001907; IPR023562; IPR029045	GO:0004252; GO:0006508
TraesCS4A02G355600.2	0	***	tr|M8B0S2|M8B0S2_TRIUA	Photosystem II reaction center Psb28 protein	PF03912: Psb28 protein	IPR005610: Photosystem II Psb28, class 1	GO:0009523 CC: photosystem II;GO:0009654 CC: photosystem II oxygen evolving complex;GO:0015979 BP: photosynthesis;GO:0016020 CC: membrane	G	PF03912	IPR005610	GO:0009523; GO:0009654; GO:0015979; GO:0016020
TraesCS4A02G355600.3	0	***	tr|A0A1D5X170|A0A1D5X170_WHEAT	Photosystem II reaction center Psb28 protein	PF03912: Psb28 protein	IPR005610: Photosystem II Psb28, class 1	GO:0009523 CC: photosystem II;GO:0009654 CC: photosystem II oxygen evolving complex;GO:0015979 BP: photosynthesis;GO:0016020 CC: membrane	G	PF03912	IPR005610	GO:0009523; GO:0009654; GO:0015979; GO:0016020
TraesCS2D02G321900.1	1	***	tr|A0A1D5UH45|A0A1D5UH45_WHEAT	Aldose 1-epimerase	PF01263: Aldose 1-epimerase	IPR008183: Aldose 1-/Glucose-6-phosphate 1-epimerase; IPR011013: Galactose mutarotase-like domain; IPR014718: Glycoside hydrolase-type carbohydrate-binding; IPR015443: Aldose 1-epimerase	GO:0003824 MF: catalytic activity;GO:0005975 BP: carbohydrate metabolic process;GO:0016853 MF: isomerase activity;GO:0019318 BP: hexose metabolic process;GO:0030246 MF: carbohydrate binding	G	PF01263	IPR008183; IPR011013; IPR014718; IPR015443	GO:0003824; GO:0005975; GO:0016853; GO:0019318; GO:0030246
TraesCS4A02G355600.1	1	***	tr|A0A1D5X170|A0A1D5X170_WHEAT	Photosystem II reaction center Psb28 protein	PF03912: Psb28 protein	IPR005610: Photosystem II Psb28, class 1	GO:0009523 CC: photosystem II;GO:0009654 CC: photosystem II oxygen evolving complex;GO:0015979 BP: photosynthesis;GO:0016020 CC: membrane	G	PF03912	IPR005610	GO:0009523; GO:0009654; GO:0015979; GO:0016020
TraesCS7A02G249900.1	0	***	AT5G66600.9	electron transporter, putative (Protein of unknown function, DUF547)	PF14389: Leucine-zipper of ternary complex factor MIP1; PF04784: Protein of unknown function, DUF547	IPR006869: Domain of unknown function DUF547; IPR025757: Ternary complex factor MIP1, leucine-zipper		U	PF14389; PF04784	IPR006869; IPR025757
TraesCS7A02G249900.2	0	***	AT5G66600.9	electron transporter, putative (Protein of unknown function, DUF547)	PF14389: Leucine-zipper of ternary complex factor MIP1; PF04784: Protein of unknown function, DUF547	IPR006869: Domain of unknown function DUF547; IPR025757: Ternary complex factor MIP1, leucine-zipper		U	PF14389; PF04784	IPR006869; IPR025757
TraesCS7A02G249900.3	1	***	AT5G66600.2	electron transporter, putative (Protein of unknown function, DUF547)	PF14389: Leucine-zipper of ternary complex factor MIP1; PF04784: Protein of unknown function, DUF547	IPR006869: Domain of unknown function DUF547; IPR025757: Ternary complex factor MIP1, leucine-zipper		U	PF14389; PF04784	IPR006869; IPR025757
TraesCS3A02G116600.1	1	***	tr|B9T2G2|B9T2G2_RICCO	Transcription factor, putative	PF13837: Myb/SANT-like DNA-binding domain			G	PF13837
TraesCS3D02G310200.1	1	***	tr|A0A0E3T7B3|A0A0E3T7B3_SECCE	Cytokinin oxidase/dehydrogenase	PF01565: FAD binding domain; PF09265: Cytokinin dehydrogenase 1, FAD and cytokinin binding	IPR006093: Oxygen oxidoreductase covalent FAD-binding site; IPR006094: FAD linked oxidase, N-terminal; IPR015345: Cytokinin dehydrogenase 1, FAD/cytokinin binding domain; IPR016164: FAD-linked oxidase-like, C-terminal; IPR016166: FAD-binding, type 2; IPR016167: FAD-binding, type 2, subdomain 1; IPR016169: CO dehydrogenase flavoprotein-like, FAD-binding, subdomain 2; IPR016170: Vanillyl-alcohol ox…	GO:0003824 MF: catalytic activity;GO:0009690 BP: cytokinin metabolic process;GO:0016491 MF: oxidoreductase activity;GO:0016614 MF: oxidoreductase activity, acting on CH-OH group of donors;GO:0019139 MF: cytokinin dehydrogenase activity;GO:0050660 MF: flavin adenine dinucleotide binding;GO:0055114 BP: oxidation-reduction process	G	PF01565; PF09265	IPR006093; IPR006094; IPR015345; IPR016164; IPR016166; IPR016167; IPR016169; IPR016170	GO:0003824; GO:0009690; GO:0016491; GO:0016614; GO:0019139; GO:0050660; GO:0055114
TraesCS1B02G116900.2	0	*-*	tr|M8CZN5|M8CZN5_AEGTA	SKP1-like protein 4				G
TraesCS1B02G116900.1	1	***	tr|M8CZN5|M8CZN5_AEGTA	SKP1-like protein 4				G
TraesCS6B02G338100.3	0	*-*	tr|A0A072U5H4|A0A072U5H4_MEDTR	BAH domain-containing protein	PF01426: BAH domain; PF08711: TFIIS helical bundle-like domain	IPR001025: Bromo adjacent homology (BAH) domain; IPR003617: Transcription elongation factor, TFIIS/CRSP70, N-terminal, sub-type; IPR017923: Transcription factor IIS, N-terminal	GO:0003682 MF: chromatin binding;GO:0005634 CC: nucleus	G	PF01426; PF08711	IPR001025; IPR003617; IPR017923	GO:0003682; GO:0005634
TraesCS6B02G338100.2	0	*-*	tr|A0A072U5H4|A0A072U5H4_MEDTR	BAH domain-containing protein	PF01426: BAH domain; PF08711: TFIIS helical bundle-like domain	IPR001025: Bromo adjacent homology (BAH) domain; IPR003617: Transcription elongation factor, TFIIS/CRSP70, N-terminal, sub-type; IPR017923: Transcription factor IIS, N-terminal	GO:0003682 MF: chromatin binding;GO:0005634 CC: nucleus	G	PF01426; PF08711	IPR001025; IPR003617; IPR017923	GO:0003682; GO:0005634
TraesCS6B02G338100.1	1	*-*	tr|A0A072U5H4|A0A072U5H4_MEDTR	BAH domain-containing protein	PF01426: BAH domain; PF08711: TFIIS helical bundle-like domain	IPR001025: Bromo adjacent homology (BAH) domain; IPR003617: Transcription elongation factor, TFIIS/CRSP70, N-terminal, sub-type; IPR017923: Transcription factor IIS, N-terminal	GO:0003682 MF: chromatin binding;GO:0005634 CC: nucleus	G	PF01426; PF08711	IPR001025; IPR003617; IPR017923	GO:0003682; GO:0005634
TraesCS6A02G305200.1	1	***	tr|A0A199VQK5|A0A199VQK5_ANACO	Exocyst complex component SEC6	PF06046: Exocyst complex component Sec6	IPR010326: Exocyst complex component EXOC3/Sec6	GO:0000145 CC: exocyst;GO:0006887 BP: exocytosis	G	PF06046	IPR010326	GO:0000145; GO:0006887
TraesCS1A02G009100.1	1	--*	sp|Q91VN4|MIC25_MOUSE	MICOS complex subunit Mic25				G
TraesCS6A02G305200.3	0	***	tr|A0A199VQK5|A0A199VQK5_ANACO	Exocyst complex component SEC6	PF06046: Exocyst complex component Sec6	IPR010326: Exocyst complex component EXOC3/Sec6	GO:0000145 CC: exocyst;GO:0006887 BP: exocytosis	G	PF06046	IPR010326	GO:0000145; GO:0006887
TraesCS6A02G305200.2	0	***	tr|A0A199VQK5|A0A199VQK5_ANACO	Exocyst complex component SEC6	PF06046: Exocyst complex component Sec6	IPR010326: Exocyst complex component EXOC3/Sec6	GO:0000145 CC: exocyst;GO:0006887 BP: exocytosis	G	PF06046	IPR010326	GO:0000145; GO:0006887
TraesCS1B02G110300.1	1	***	tr|Q84QU5|Q84QU5_ORYSJ	F-box domain containing protein-like	PF03478: Protein of unknown function (DUF295)	IPR005174: Domain unknown function DUF295		TE?	PF03478	IPR005174
TraesCS2D02G299500.2	0	***	tr|W9QGC3|W9QGC3_9ROSA	3-hydroxybenzoate 6-hydroxylase 1	PF01494: FAD binding domain	IPR002938: FAD-binding domain; IPR023753: FAD/NAD(P)-binding domain	GO:0016491 MF: oxidoreductase activity;GO:0055114 BP: oxidation-reduction process;GO:0071949 MF: FAD binding	G	PF01494	IPR002938; IPR023753	GO:0016491; GO:0055114; GO:0071949
TraesCS2D02G299500.1	1	***	tr|W9QGC3|W9QGC3_9ROSA	3-hydroxybenzoate 6-hydroxylase 1	PF01494: FAD binding domain	IPR002938: FAD-binding domain; IPR023753: FAD/NAD(P)-binding domain	GO:0016491 MF: oxidoreductase activity;GO:0055114 BP: oxidation-reduction process;GO:0071949 MF: FAD binding	G	PF01494	IPR002938; IPR023753	GO:0016491; GO:0055114; GO:0071949
TraesCS7D02G105200.1	1	--*	AT1G66680.1	S-adenosyl-L-methionine-dependent methyltransferases superfamily protein				G
TraesCS4D02G247000.3	0	*-*	tr|F4IYH6|F4IYH6_ARATH	RING/FYVE/PHD zinc finger superfamily protein				TE?
TraesCS1A02G415700.1	1	***	tr|B9I246|B9I246_POPTR	Transporter family protein	PF03169: OPT oligopeptide transporter protein	IPR004813: Oligopeptide transporter, OPT superfamily	GO:0055085 BP: transmembrane transport	G	PF03169	IPR004813	GO:0055085
TraesCS2B02G261200.1	1	***	tr|W9QNC0|W9QNC0_9ROSA	Ras-related protein	PF00071: Ras family	IPR001806: Small GTPase superfamily; IPR005225: Small GTP-binding protein domain; IPR027417: P-loop containing nucleoside triphosphate hydrolase	GO:0003924 MF: GTPase activity;GO:0005525 MF: GTP binding	G	PF00071	IPR001806; IPR005225; IPR027417	GO:0003924; GO:0005525
TraesCS2A02G353400.1	1	***	AT5G16250.1	transmembrane protein				G
TraesCS5A02G529400.1	1	***	tr|A0A0K9PUI8|A0A0K9PUI8_ZOSMR	LOB domain-containing protein	PF03195: Protein of unknown function DUF260	IPR004883: Lateral organ boundaries, LOB		G	PF03195	IPR004883
TraesCS1A02G328000.1	1	***	tr|A0A096UJY5|A0A096UJY5_WHEAT	Poly [ADP-ribose] polymerase	PF08063: PADR1 (NUC008) domain; PF16589: BRCT domain, a BRCA1 C-terminus domain; PF05406: WGR domain; PF02877: Poly(ADP-ribose) polymerase, regulatory domain; PF00644: Poly(ADP-ribose) polymerase catalytic domain	IPR001357: BRCT domain; IPR004102: Poly(ADP-ribose) polymerase, regulatory domain; IPR008893: WGR domain; IPR012317: Poly(ADP-ribose) polymerase, catalytic domain; IPR012982: PADR1 domain	GO:0003950 MF: NAD+ ADP-ribosyltransferase activity;GO:0006471 BP: protein ADP-ribosylation	G	PF08063; PF16589; PF05406; PF02877; PF00644	IPR001357; IPR004102; IPR008893; IPR012317; IPR012982	GO:0003950; GO:0006471
TraesCS5D02G412300.3	0	***	tr|Q10EP0|Q10EP0_ORYSJ	Signal peptidase I family protein, expressed	PF00717: Peptidase S24-like	IPR000223: Peptidase S26A, signal peptidase I; IPR015927: Peptidase S24/S26A/S26B/S26C; IPR019756: Peptidase S26A, signal peptidase I, serine active site; IPR019757: Peptidase S26A, signal peptidase I, lysine active site	GO:0006508 BP: proteolysis;GO:0008236 MF: serine-type peptidase activity;GO:0016020 CC: membrane;GO:0016021 CC: integral component of membrane	G	PF00717	IPR000223; IPR015927; IPR019756; IPR019757	GO:0006508; GO:0008236; GO:0016020; GO:0016021
TraesCS5D02G412300.2	0	***	tr|Q10EP0|Q10EP0_ORYSJ	Signal peptidase I family protein, expressed	PF00717: Peptidase S24-like	IPR000223: Peptidase S26A, signal peptidase I; IPR015927: Peptidase S24/S26A/S26B/S26C; IPR019756: Peptidase S26A, signal peptidase I, serine active site; IPR019757: Peptidase S26A, signal peptidase I, lysine active site	GO:0006508 BP: proteolysis;GO:0008236 MF: serine-type peptidase activity;GO:0016020 CC: membrane;GO:0016021 CC: integral component of membrane	G	PF00717	IPR000223; IPR015927; IPR019756; IPR019757	GO:0006508; GO:0008236; GO:0016020; GO:0016021
TraesCS5D02G412300.4	0	***	tr|Q10EP0|Q10EP0_ORYSJ	Signal peptidase I family protein, expressed	PF00717: Peptidase S24-like	IPR000223: Peptidase S26A, signal peptidase I; IPR015927: Peptidase S24/S26A/S26B/S26C; IPR019756: Peptidase S26A, signal peptidase I, serine active site; IPR019757: Peptidase S26A, signal peptidase I, lysine active site	GO:0006508 BP: proteolysis;GO:0008236 MF: serine-type peptidase activity;GO:0016020 CC: membrane;GO:0016021 CC: integral component of membrane	G	PF00717	IPR000223; IPR015927; IPR019756; IPR019757	GO:0006508; GO:0008236; GO:0016020; GO:0016021
TraesCS5A02G469900.1	1	*-*	tr|D7KCZ7|D7KCZ7_ARALL	Thioesterase family protein	PF03061: Thioesterase superfamily	IPR006683: Thioesterase domain; IPR029069: HotDog domain		G	PF03061	IPR006683; IPR029069
TraesCS1D02G452300.1	1	***	tr|A0A1D5SQI2|A0A1D5SQI2_WHEAT	Nucleoside diphosphate kinase	PF00334: Nucleoside diphosphate kinase	IPR001564: Nucleoside diphosphate kinase; IPR023005: Nucleoside diphosphate kinase, active site	GO:0004550 MF: nucleoside diphosphate kinase activity;GO:0006165 BP: nucleoside diphosphate phosphorylation;GO:0006183 BP: GTP biosynthetic process;GO:0006228 BP: UTP biosynthetic process;GO:0006241 BP: CTP biosynthetic process	G	PF00334	IPR001564; IPR023005	GO:0004550; GO:0006165; GO:0006183; GO:0006228; GO:0006241
TraesCS1D02G264600.1	1	***	tr|A7VM41|A7VM41_MARPO	Receptor-like kinase	PF00069: Protein kinase domain	IPR000719: Protein kinase domain; IPR008271: Serine/threonine-protein kinase, active site; IPR011009: Protein kinase-like domain; IPR017441: Protein kinase, ATP binding site	GO:0004672 MF: protein kinase activity;GO:0005524 MF: ATP binding;GO:0006468 BP: protein phosphorylation	G	PF00069	IPR000719; IPR008271; IPR011009; IPR017441	GO:0004672; GO:0005524; GO:0006468
TraesCS2D02G102400.1	1	--*	tr|A0A1D1ZGX5|A0A1D1ZGX5_9ARAE	Translation initiation factor IF-2				G
TraesCS6D02G205700.1	1	***	tr|G7J6Y7|G7J6Y7_MEDTR	SPla/RYanodine receptor (SPRY) domain protein				G
TraesCS2B02G419400.1	1	***	tr|N1R1B5|N1R1B5_AEGTA	E3 ubiquitin-protein ligase	PF13639: Ring finger domain	IPR001841: Zinc finger, RING-type; IPR013083: Zinc finger, RING/FYVE/PHD-type	GO:0005515 MF: protein binding;GO:0008270 MF: zinc ion binding	G	PF13639	IPR001841; IPR013083	GO:0005515; GO:0008270
TraesCS7A02G242100.1	1	***	tr|A0A1E5VZW0|A0A1E5VZW0_9POAL	Pentatricopeptide repeat-containing protein	PF01535: PPR repeat; PF13041: PPR repeat family	IPR002885: Pentatricopeptide repeat; IPR011990: Tetratricopeptide-like helical domain	GO:0005515 MF: protein binding	G	PF01535; PF13041	IPR002885; IPR011990	GO:0005515
TraesCS2A02G006200.1	1	***	tr|A0A1B1X422|A0A1B1X422_9LILI	HXXXD-type acyl-transferase family protein	PF02458: Transferase family	IPR003480: Transferase	GO:0016747 MF: transferase activity, transferring acyl groups other than amino-acyl groups	G	PF02458	IPR003480	GO:0016747
TraesCS1D02G303900.1	0	***	tr|B6SVB8|B6SVB8_MAIZE	CCR4-NOT transcription complex subunit 2				G
TraesCS2A02G329000.1	1	***	tr|B1B611|B1B611_ROSHC	Beta-glucosidase	PF00232: Glycosyl hydrolase family 1	IPR001360: Glycoside hydrolase family 1; IPR017853: Glycoside hydrolase superfamily; IPR033132: Glycosyl hydrolases family 1, N-terminal conserved site	GO:0004553 MF: hydrolase activity, hydrolyzing O-glycosyl compounds;GO:0005975 BP: carbohydrate metabolic process	G	PF00232	IPR001360; IPR017853; IPR033132	GO:0004553; GO:0005975
TraesCS4D02G035900.1	0	***	tr|A0A1E5W1X5|A0A1E5W1X5_9POAL	Importin-5	PF13646: HEAT repeats; PF02985: HEAT repeat	IPR000357: HEAT repeat; IPR011989: Armadillo-like helical; IPR016024: Armadillo-type fold; IPR021133: HEAT, type 2; IPR034085: TOG domain	GO:0005488 MF: binding;GO:0005515 MF: protein binding	G	PF13646; PF02985	IPR000357; IPR011989; IPR016024; IPR021133; IPR034085	GO:0005488; GO:0005515
TraesCS1D02G453600.1	1	***	tr|U3LKI6|U3LKI6_WHEAT	Argonaute	PF16486: N-terminal domain of argonaute; PF08699: Argonaute linker 1 domain; PF02170: PAZ domain; PF16488: Argonaute linker 2 domain; PF02171: Piwi domain	IPR003100: PAZ domain; IPR003165: Piwi domain; IPR012337: Ribonuclease H-like domain; IPR014811: Argonaute, linker 1 domain; IPR032472: Argonaute linker 2 domain; IPR032474: Protein argonaute, N-terminal	GO:0003676 MF: nucleic acid binding;GO:0005515 MF: protein binding	G	PF16486; PF08699; PF02170; PF16488; PF02171	IPR003100; IPR003165; IPR012337; IPR014811; IPR032472; IPR032474	GO:0003676; GO:0005515
TraesCS7B02G169400.1	1	*-*	tr|A0A1J3HNP1|A0A1J3HNP1_NOCCA	Glutathione S-transferase T3	PF14303: No apical meristem-associated C-terminal domain	IPR029466: No apical meristem-associated, C-terminal domain		G	PF14303	IPR029466
TraesCS1D02G303900.4	0	***	tr|B6SVB8|B6SVB8_MAIZE	CCR4-NOT transcription complex subunit 2	PF04153: NOT2 / NOT3 / NOT5 family	IPR007282: NOT2/NOT3/NOT5	GO:0005634 CC: nucleus;GO:0006355 BP: regulation of transcription, DNA-templated	G	PF04153	IPR007282	GO:0005634; GO:0006355
TraesCS5A02G247500.1	0	*-*	tr|A0A173GPJ1|A0A173GPJ1_9ASPA	Glutathione S-transferase	PF02798: Glutathione S-transferase, N-terminal domain	IPR004045: Glutathione S-transferase, N-terminal; IPR010987: Glutathione S-transferase, C-terminal-like; IPR012336: Thioredoxin-like fold	GO:0005515 MF: protein binding	G	PF02798	IPR004045; IPR010987; IPR012336	GO:0005515
TraesCS5A02G247500.2	1	***	tr|A0A173GPJ1|A0A173GPJ1_9ASPA	Glutathione S-transferase	PF02798: Glutathione S-transferase, N-terminal domain; PF13410: Glutathione S-transferase, C-terminal domain	IPR004045: Glutathione S-transferase, N-terminal; IPR010987: Glutathione S-transferase, C-terminal-like; IPR012336: Thioredoxin-like fold	GO:0005515 MF: protein binding	G	PF02798; PF13410	IPR004045; IPR010987; IPR012336	GO:0005515
TraesCS6B02G115700.1	1	*-*	tr|A0A1J3CM44|A0A1J3CM44_NOCCA	Aspartate--tRNA(Asp/Asn) ligase				G
TraesCS2B02G608300.1	1	***	sp|P44933|KEFX_HAEIN	Glutathione-regulated potassium-efflux system protein	PF00999: Sodium/hydrogen exchanger family; PF02254: TrkA-N domain	IPR003148: Regulator of K+ conductance, N-terminal; IPR004771: K+/H+ exchanger; IPR006153: Cation/H+ exchanger; IPR016040: NAD(P)-binding domain	GO:0006812 BP: cation transport;GO:0006813 BP: potassium ion transport;GO:0008324 MF: cation transmembrane transporter activity;GO:0015299 MF: solute:proton antiporter activity;GO:0016021 CC: integral component of membrane;GO:0055085 BP: transmembrane transport	G	PF00999; PF02254	IPR003148; IPR004771; IPR006153; IPR016040	GO:0006812; GO:0006813; GO:0008324; GO:0015299; GO:0016021; GO:0055085
TraesCS4A02G415700.1	1	***	sp|F4HSX9|KLCR3_ARATH	Protein KINESIN LIGHT CHAIN-RELATED 3	PF13424: Tetratricopeptide repeat	IPR011990: Tetratricopeptide-like helical domain; IPR011991: Winged helix-turn-helix DNA-binding domain; IPR019734: Tetratricopeptide repeat	GO:0005515 MF: protein binding	G	PF13424	IPR011990; IPR011991; IPR019734	GO:0005515
TraesCS1D02G320800.2	0	***	tr|A0A1D5S013|A0A1D5S013_WHEAT	Serine/threonine-protein kinase	PF01453: D-mannose binding lectin; PF00954: S-locus glycoprotein domain; PF08276: PAN-like domain; PF07714: Protein tyrosine kinase	IPR000719: Protein kinase domain; IPR000742: EGF-like domain; IPR000858: S-locus glycoprotein domain; IPR001245: Serine-threonine/tyrosine-protein kinase, catalytic domain; IPR001480: Bulb-type lectin domain; IPR003609: PAN/Apple domain; IPR008271: Serine/threonine-protein kinase, active site; IPR011009: Protein kinase-like domain; IPR024171: S-receptor-like serine/threonine-protein kinase	GO:0004672 MF: protein kinase activity;GO:0004674 MF: protein serine/threonine kinase activity;GO:0005515 MF: protein binding;GO:0005524 MF: ATP binding;GO:0006468 BP: protein phosphorylation;GO:0048544 BP: recognition of pollen	G	PF01453; PF00954; PF08276; PF07714	IPR000719; IPR000742; IPR000858; IPR001245; IPR001480; IPR003609; IPR008271; IPR011009; IPR024171	GO:0004672; GO:0004674; GO:0005515; GO:0005524; GO:0006468; GO:0048544
TraesCS1D02G320800.3	1	***	tr|A0A1D5S013|A0A1D5S013_WHEAT	Serine/threonine-protein kinase	PF01453: D-mannose binding lectin; PF00954: S-locus glycoprotein domain; PF08276: PAN-like domain; PF07714: Protein tyrosine kinase	IPR000719: Protein kinase domain; IPR000742: EGF-like domain; IPR000858: S-locus glycoprotein domain; IPR001245: Serine-threonine/tyrosine-protein kinase, catalytic domain; IPR001480: Bulb-type lectin domain; IPR003609: PAN/Apple domain; IPR008271: Serine/threonine-protein kinase, active site; IPR011009: Protein kinase-like domain; IPR024171: S-receptor-like serine/threonine-protein kinase	GO:0004672 MF: protein kinase activity;GO:0004674 MF: protein serine/threonine kinase activity;GO:0005515 MF: protein binding;GO:0005524 MF: ATP binding;GO:0006468 BP: protein phosphorylation;GO:0048544 BP: recognition of pollen	G	PF01453; PF00954; PF08276; PF07714	IPR000719; IPR000742; IPR000858; IPR001245; IPR001480; IPR003609; IPR008271; IPR011009; IPR024171	GO:0004672; GO:0004674; GO:0005515; GO:0005524; GO:0006468; GO:0048544
TraesCS1D02G320800.1	0	***	tr|A0A1D5S013|A0A1D5S013_WHEAT	Serine/threonine-protein kinase	PF01453: D-mannose binding lectin; PF00954: S-locus glycoprotein domain; PF08276: PAN-like domain; PF07714: Protein tyrosine kinase	IPR000719: Protein kinase domain; IPR000742: EGF-like domain; IPR000858: S-locus glycoprotein domain; IPR001245: Serine-threonine/tyrosine-protein kinase, catalytic domain; IPR001480: Bulb-type lectin domain; IPR003609: PAN/Apple domain; IPR008271: Serine/threonine-protein kinase, active site; IPR011009: Protein kinase-like domain; IPR024171: S-receptor-like serine/threonine-protein kinase	GO:0004672 MF: protein kinase activity;GO:0004674 MF: protein serine/threonine kinase activity;GO:0005515 MF: protein binding;GO:0005524 MF: ATP binding;GO:0006468 BP: protein phosphorylation;GO:0048544 BP: recognition of pollen	G	PF01453; PF00954; PF08276; PF07714	IPR000719; IPR000742; IPR000858; IPR001245; IPR001480; IPR003609; IPR008271; IPR011009; IPR024171	GO:0004672; GO:0004674; GO:0005515; GO:0005524; GO:0006468; GO:0048544
TraesCS4D02G241200.1	1	--*	AT4G13020.6	Protein kinase superfamily protein	PF16029: Domain of unknown function (DUF4787)	IPR031985: Domain of unknown function DUF4787		G	PF16029	IPR031985
TraesCS2A02G323700.1	1	***	AT4G14615.1	sporulation-specific protein	PF09803: Uncharacterized conserved protein (DUF2346)	IPR018625: Protein Pet100	GO:0005739 CC: mitochondrion;GO:0033617 BP: mitochondrial respiratory chain complex IV assembly	G	PF09803	IPR018625	GO:0005739; GO:0033617
TraesCS7A02G477300.1	1	***	tr|G7KLS4|G7KLS4_MEDTR	Ubiquitin conjugation factor E4, putative	PF10408: Ubiquitin elongating factor core; PF04564: U-box domain	IPR003613: U box domain; IPR013083: Zinc finger, RING/FYVE/PHD-type; IPR019474: Ubiquitin conjugation factor E4, core	GO:0000151 CC: ubiquitin ligase complex;GO:0004842 MF: ubiquitin-protein transferase activity;GO:0006511 BP: ubiquitin-dependent protein catabolic process;GO:0016567 BP: protein ubiquitination;GO:0034450 MF: ubiquitin-ubiquitin ligase activity	G	PF10408; PF04564	IPR003613; IPR013083; IPR019474	GO:0000151; GO:0004842; GO:0006511; GO:0016567; GO:0034450
TraesCS3D02G327600.1	1	*-*	AT3G14880.2	transcription factor-like protein	PF00170: bZIP transcription factor; PF14144: Seed dormancy control	IPR004827: Basic-leucine zipper domain; IPR025422: Transcription factor TGA like domain	GO:0003700 MF: transcription factor activity, sequence-specific DNA binding;GO:0006351 BP: transcription, DNA-templated;GO:0006355 BP: regulation of transcription, DNA-templated;GO:0043565 MF: sequence-specific DNA binding	G	PF00170; PF14144	IPR004827; IPR025422	GO:0003700; GO:0006351; GO:0006355; GO:0043565
TraesCS3A02G471700.1	1	***	tr|M8BDU1|M8BDU1_AEGTA	Basic 7S globulin	PF14543: Xylanase inhibitor N-terminal; PF14541: Xylanase inhibitor C-terminal	IPR021109: Aspartic peptidase domain; IPR032799: Xylanase inhibitor, C-terminal; IPR032861: Xylanase inhibitor, N-terminal		G	PF14543; PF14541	IPR021109; IPR032799; IPR032861
TraesCS2D02G200500.1	1	***	tr|Q43448|Q43448_SOYBN	Cysteine proteinase	PF08246: Cathepsin propeptide inhibitor domain (I29); PF00112: Papain family cysteine protease	IPR000169: Cysteine peptidase, cysteine active site; IPR000668: Peptidase C1A, papain C-terminal; IPR013201: Cathepsin propeptide inhibitor domain (I29); IPR025660: Cysteine peptidase, histidine active site; IPR025661: Cysteine peptidase, asparagine active site	GO:0006508 BP: proteolysis;GO:0008234 MF: cysteine-type peptidase activity	G	PF08246; PF00112	IPR000169; IPR000668; IPR013201; IPR025660; IPR025661	GO:0006508; GO:0008234
TraesCS5B02G195900.1	1	***	tr|A0A072TUJ8|A0A072TUJ8_MEDTR	Trichome birefringence-like protein	PF14416: PMR5 N terminal Domain; PF13839: GDSL/SGNH-like Acyl-Esterase family found in Pmr5 and Cas1p	IPR025846: PMR5 N-terminal domain; IPR026057: PC-Esterase		G	PF14416; PF13839	IPR025846; IPR026057
TraesCS7D02G435100.1	1	***	tr|M8BDG5|M8BDG5_AEGTA	Protein SCO1-like protein, mitochondrial	PF02630: SCO1/SenC	IPR003782: Copper chaperone SCO1/SenC; IPR012336: Thioredoxin-like fold; IPR013766: Thioredoxin domain	GO:0045454 BP: cell redox homeostasis	G	PF02630	IPR003782; IPR012336; IPR013766	GO:0045454
TraesCS5A02G136400.1	1	***	tr|Q2RAS2|Q2RAS2_ORYSJ	Mitochondrial glycoprotein, expressed	PF02330: Mitochondrial glycoprotein	IPR003428: Mitochondrial glycoprotein	GO:0005759 CC: mitochondrial matrix	G	PF02330	IPR003428	GO:0005759
TraesCS7A02G330900.1	1	***	tr|W5H7G2|W5H7G2_WHEAT	Hexosyltransferase	PF13334: Domain of unknown function (DUF4094); PF01762: Galactosyltransferase	IPR002659: Glycosyl transferase, family 31; IPR025298: Domain of unknown function DUF4094	GO:0006486 BP: protein glycosylation;GO:0008378 MF: galactosyltransferase activity;GO:0016020 CC: membrane	G	PF13334; PF01762	IPR002659; IPR025298	GO:0006486; GO:0008378; GO:0016020
TraesCS1A02G308000.2	1	***	tr|A0A199W6W3|A0A199W6W3_ANACO	UV radiation resistance-associated				G
TraesCS1A02G308000.1	0	***	tr|A0A199W6W3|A0A199W6W3_ANACO	UV radiation resistance-associated				G
TraesCS6A02G298800.1	1	***	tr|A0A1E5UW37|A0A1E5UW37_9POAL	Microtubule-associated protein 70-2	PF07058: Microtubule-associated protein 70	IPR009768: Microtubule-associated protein 70	GO:0007010 BP: cytoskeleton organization;GO:0008017 MF: microtubule binding	G	PF07058	IPR009768	GO:0007010; GO:0008017
TraesCS4A02G310700.1	1	***	tr|A0A061G098|A0A061G098_THECC	C2H2-like zinc finger protein, putative		IPR013087: Zinc finger C2H2-type	GO:0003676 MF: nucleic acid binding	TE?		IPR013087	GO:0003676
TraesCS3A02G364600.1	1	***	AT5G59050.1	G patch domain protein				G
TraesCS5B02G092600.1	1	***	AT2G32500.2	Stress responsive alpha-beta barrel domain protein	PF07876: Stress responsive A/B Barrel Domain	IPR011008: Dimeric alpha-beta barrel; IPR013097: Stress responsive alpha-beta barrel		G	PF07876	IPR011008; IPR013097
TraesCS7B02G001500.3	1	***	tr|B9SZV1|B9SZV1_RICCO	RNA binding protein, putative	PF00076: RNA recognition motif. (a.k.a. RRM, RBD, or RNP domain)	IPR000504: RNA recognition motif domain	GO:0003676 MF: nucleic acid binding	G	PF00076	IPR000504	GO:0003676
TraesCS1D02G350900.1	1	***	tr|G7J9U0|G7J9U0_MEDTR	Early nodulin-like protein	PF02298: Plastocyanin-like domain	IPR003245: Phytocyanin domain; IPR008972: Cupredoxin	GO:0009055 MF: electron carrier activity	G	PF02298	IPR003245; IPR008972	GO:0009055
TraesCS7A02G192600.1	1	***	tr|R7W7X4|R7W7X4_AEGTA	Pre-mRNA-splicing factor SYF1		IPR003107: HAT (Half-A-TPR) repeat; IPR011990: Tetratricopeptide-like helical domain	GO:0005515 MF: protein binding;GO:0006396 BP: RNA processing	G		IPR003107; IPR011990	GO:0005515; GO:0006396
TraesCS6D02G127000.2	0	***	tr|A0A199W057|A0A199W057_ANACO	Exosome complex component rrp4	PF15985: KH domain	IPR004088: K Homology domain, type 1; IPR012340: Nucleic acid-binding, OB-fold	GO:0003723 MF: RNA binding	G	PF15985	IPR004088; IPR012340	GO:0003723
TraesCS4B02G065400.1	1	***	tr|G7LGL1|G7LGL1_MEDTR	Transducin/WD-like repeat-protein	PF00400: WD domain, G-beta repeat	IPR001680: WD40 repeat; IPR011047: Quinoprotein alcohol dehydrogenase-like superfamily; IPR015943: WD40/YVTN repeat-like-containing domain; IPR017986: WD40-repeat-containing domain	GO:0005515 MF: protein binding	G	PF00400	IPR001680; IPR011047; IPR015943; IPR017986	GO:0005515
TraesCS4A02G171800.1	0	***	tr|B9SGJ4|B9SGJ4_RICCO	Splicing factor u2af large subunit, putative	PF00076: RNA recognition motif. (a.k.a. RRM, RBD, or RNP domain)	IPR000504: RNA recognition motif domain; IPR006529: U2 snRNP auxilliary factor, large subunit, splicing factor	GO:0003676 MF: nucleic acid binding;GO:0003723 MF: RNA binding;GO:0005634 CC: nucleus;GO:0006397 BP: mRNA processing	G	PF00076	IPR000504; IPR006529	GO:0003676; GO:0003723; GO:0005634; GO:0006397
TraesCS4B02G047600.1	1	***	tr|A0A1D6D779|A0A1D6D779_WHEAT	Threonine dehydratase	PF00291: Pyridoxal-phosphate dependent enzyme; PF00585: C-terminal regulatory domain of Threonine dehydratase	IPR000634: Serine/threonine dehydratase, pyridoxal-phosphate-binding site; IPR001721: ACT-like domain; IPR001926: Tryptophan synthase beta subunit-like PLP-dependent enzyme; IPR005787: Threonine dehydratase, biosynthetic	GO:0004794 MF: L-threonine ammonia-lyase activity;GO:0006520 BP: cellular amino acid metabolic process;GO:0009097 BP: isoleucine biosynthetic process;GO:0030170 MF: pyridoxal phosphate binding	G	PF00291; PF00585	IPR000634; IPR001721; IPR001926; IPR005787	GO:0004794; GO:0006520; GO:0009097; GO:0030170
TraesCS2A02G385300.1	0	--*	tr|A0A061DKZ1|A0A061DKZ1_THECC	Aspartyl/glutamyl-tRNA(Asn/Gln) amidotransferase subunit B, putative isoform 1				G
TraesCS2A02G385300.2	0	***	AT1G04030.2	eisosome protein				G
TraesCS2A02G385300.3	1	*-*	tr|A0A061DK46|A0A061DK46_THECC	Aspartyl/glutamyl-tRNA(Asn/Gln) amidotransferase subunit B, putative isoform 3				G
TraesCS4A02G309900.1	1	***	tr|M8C5J4|M8C5J4_AEGTA	Wall-associated receptor kinase 2	PF13947: Wall-associated receptor kinase galacturonan-binding	IPR025287: Wall-associated receptor kinase, galacturonan-binding domain	GO:0030247 MF: polysaccharide binding	G	PF13947	IPR025287	GO:0030247
TraesCS4D02G035900.2	1	***	tr|A0A1E5W1X5|A0A1E5W1X5_9POAL	Importin-5	PF13646: HEAT repeats; PF02985: HEAT repeat	IPR000357: HEAT repeat; IPR011989: Armadillo-like helical; IPR016024: Armadillo-type fold; IPR021133: HEAT, type 2; IPR034085: TOG domain	GO:0005488 MF: binding;GO:0005515 MF: protein binding	G	PF13646; PF02985	IPR000357; IPR011989; IPR016024; IPR021133; IPR034085	GO:0005488; GO:0005515
TraesCS7B02G257900.1	1	***	tr|A0A1D6BP62|A0A1D6BP62_WHEAT	Glycosyltransferase	PF00201: UDP-glucoronosyl and UDP-glucosyl transferase	IPR002213: UDP-glucuronosyl/UDP-glucosyltransferase	GO:0008152 BP: metabolic process;GO:0016758 MF: transferase activity, transferring hexosyl groups	G	PF00201	IPR002213	GO:0008152; GO:0016758
TraesCS4A02G008000.1	1	*-*	tr|A0A0X8VYK1|A0A0X8VYK1_ELECO	Jasmonate ZIM domain protein	PF06200: tify domain; PF09425: Divergent CCT motif	IPR010399: Tify domain; IPR018467: CO/COL/TOC1, conserved site		G	PF06200; PF09425	IPR010399; IPR018467
TraesCS1B02G256200.1	0	***	tr|A0A0B2QMC9|A0A0B2QMC9_GLYSO	E3 ubiquitin-protein ligase KEG	PF12796: Ankyrin repeats (3 copies)	IPR002110: Ankyrin repeat; IPR020683: Ankyrin repeat-containing domain	GO:0005515 MF: protein binding	G	PF12796	IPR002110; IPR020683	GO:0005515
TraesCS4D02G180500.2	0	*-*	tr|F4JDC3|F4JDC3_ARATH	Evolutionarily conserved C-terminal region 2	PF04146: YT521-B-like domain	IPR007275: YTH domain	GO:0003723 MF: RNA binding	G	PF04146	IPR007275	GO:0003723
TraesCS4D02G180500.3	0	*-*	tr|F4JDC3|F4JDC3_ARATH	Evolutionarily conserved C-terminal region 2	PF04146: YT521-B-like domain	IPR007275: YTH domain	GO:0003723 MF: RNA binding	G	PF04146	IPR007275	GO:0003723
TraesCS4D02G180500.1	0	*-*	tr|F4JDC3|F4JDC3_ARATH	Evolutionarily conserved C-terminal region 2	PF04146: YT521-B-like domain	IPR007275: YTH domain	GO:0003723 MF: RNA binding	G	PF04146	IPR007275	GO:0003723
TraesCS1B02G256200.2	1	*-*	tr|B9RV87|B9RV87_RICCO	Protein kinase, putative	PF00097: Zinc finger, C3HC4 type (RING finger); PF00069: Protein kinase domain; PF12796: Ankyrin repeats (3 copies)	IPR000719: Protein kinase domain; IPR001841: Zinc finger, RING-type; IPR002110: Ankyrin repeat; IPR011009: Protein kinase-like domain; IPR013083: Zinc finger, RING/FYVE/PHD-type; IPR017907: Zinc finger, RING-type, conserved site; IPR018957: Zinc finger, C3HC4 RING-type; IPR020683: Ankyrin repeat-containing domain	GO:0004672 MF: protein kinase activity;GO:0005515 MF: protein binding;GO:0005524 MF: ATP binding;GO:0006468 BP: protein phosphorylation;GO:0008270 MF: zinc ion binding;GO:0046872 MF: metal ion binding	G	PF00097; PF00069; PF12796	IPR000719; IPR001841; IPR002110; IPR011009; IPR013083; IPR017907; IPR018957; IPR020683	GO:0004672; GO:0005515; GO:0005524; GO:0006468; GO:0008270; GO:0046872
TraesCS4D02G180500.4	0	*-*	tr|F4JDC3|F4JDC3_ARATH	Evolutionarily conserved C-terminal region 2	PF04146: YT521-B-like domain	IPR007275: YTH domain	GO:0003723 MF: RNA binding	G	PF04146	IPR007275	GO:0003723
TraesCS4D02G180500.5	1	*-*	tr|F4JDC3|F4JDC3_ARATH	Evolutionarily conserved C-terminal region 2	PF04146: YT521-B-like domain	IPR007275: YTH domain	GO:0003723 MF: RNA binding	G	PF04146	IPR007275	GO:0003723
TraesCS5D02G270400.1	1	--*	AT2G33240.8	myosin XI D				G
TraesCS7A02G263300.1	1	*-*	AT3G21500.3	1-deoxy-D-xylulose 5-phosphate synthase 1	PF02779: Transketolase, pyrimidine binding domain; PF02780: Transketolase, C-terminal domain	IPR005475: Transketolase-like, pyrimidine-binding domain; IPR009014: Transketolase C-terminal/Pyruvate-ferredoxin oxidoreductase domain II; IPR029061: Thiamin diphosphate-binding fold; IPR033248: Transketolase, C-terminal domain	GO:0003824 MF: catalytic activity;GO:0008152 BP: metabolic process	G	PF02779; PF02780	IPR005475; IPR009014; IPR029061; IPR033248	GO:0003824; GO:0008152
TraesCS3D02G063900.1	1	***	AT5G07610.1	F-box family protein	PF12937: F-box-like	IPR001810: F-box domain	GO:0005515 MF: protein binding	TE?	PF12937	IPR001810	GO:0005515
TraesCS3D02G063900.2	0	***	AT5G07610.1	F-box family protein	PF12937: F-box-like	IPR001810: F-box domain	GO:0005515 MF: protein binding	TE?	PF12937	IPR001810	GO:0005515
TraesCS3A02G029300.1	1	***	tr|A0A1D5VN60|A0A1D5VN60_WHEAT	E3 ubiquitin-protein ligase		IPR008974: TRAF-like; IPR013010: Zinc finger, SIAH-type; IPR013083: Zinc finger, RING/FYVE/PHD-type	GO:0005515 MF: protein binding;GO:0008270 MF: zinc ion binding	G		IPR008974; IPR013010; IPR013083	GO:0005515; GO:0008270
TraesCS6A02G312500.2	1	***	tr|Q2ACC1|Q2ACC1_MAIZE	Histidine kinase	PF03924: CHASE domain; PF00512: His Kinase A (phospho-acceptor) domain; PF02518: Histidine kinase-, DNA gyrase B-, and HSP90-like ATPase; PF00072: Response regulator receiver domain	IPR001789: Signal transduction response regulator, receiver domain; IPR003594: Histidine kinase-like ATPase, C-terminal domain; IPR003661: Signal transduction histidine kinase, dimerisation/phosphoacceptor domain; IPR004358: Signal transduction histidine kinase-related protein, C-terminal; IPR005467: Histidine kinase domain; IPR006189: CHASE domain; IPR011006: CheY-like superfamily	GO:0000155 MF: phosphorelay sensor kinase activity;GO:0000160 BP: phosphorelay signal transduction system;GO:0007165 BP: signal transduction;GO:0016310 BP: phosphorylation;GO:0016772 MF: transferase activity, transferring phosphorus-containing groups	G	PF03924; PF00512; PF02518; PF00072	IPR001789; IPR003594; IPR003661; IPR004358; IPR005467; IPR006189; IPR011006	GO:0000155; GO:0000160; GO:0007165; GO:0016310; GO:0016772
TraesCS6D02G184100.1	1	***	tr|A0A097PNE1|A0A097PNE1_BRADI	Iron-sulfur cluster biosynthesis family protein		IPR011991: Winged helix-turn-helix DNA-binding domain		G		IPR011991
TraesCS6A02G312500.1	0	***	tr|Q2ACC1|Q2ACC1_MAIZE	Histidine kinase	PF03924: CHASE domain; PF00512: His Kinase A (phospho-acceptor) domain; PF02518: Histidine kinase-, DNA gyrase B-, and HSP90-like ATPase; PF00072: Response regulator receiver domain	IPR001789: Signal transduction response regulator, receiver domain; IPR003594: Histidine kinase-like ATPase, C-terminal domain; IPR003661: Signal transduction histidine kinase, dimerisation/phosphoacceptor domain; IPR004358: Signal transduction histidine kinase-related protein, C-terminal; IPR005467: Histidine kinase domain; IPR006189: CHASE domain; IPR011006: CheY-like superfamily	GO:0000155 MF: phosphorelay sensor kinase activity;GO:0000160 BP: phosphorelay signal transduction system;GO:0007165 BP: signal transduction;GO:0016310 BP: phosphorylation;GO:0016772 MF: transferase activity, transferring phosphorus-containing groups	G	PF03924; PF00512; PF02518; PF00072	IPR001789; IPR003594; IPR003661; IPR004358; IPR005467; IPR006189; IPR011006	GO:0000155; GO:0000160; GO:0007165; GO:0016310; GO:0016772
TraesCS6B02G444500.1	1	***	tr|R7W4P2|R7W4P2_AEGTA	Mitochondrial metalloendopeptidase OMA1	PF01435: Peptidase family M48	IPR001915: Peptidase M48	GO:0004222 MF: metalloendopeptidase activity;GO:0006508 BP: proteolysis	G	PF01435	IPR001915	GO:0004222; GO:0006508
TraesCS5B02G432100.1	1	***	tr|R7WEL0|R7WEL0_AEGTA	Blue copper protein	PF02298: Plastocyanin-like domain	IPR003245: Phytocyanin domain; IPR008972: Cupredoxin	GO:0009055 MF: electron carrier activity	G	PF02298	IPR003245; IPR008972	GO:0009055
TraesCS6B02G388000.1	1	*-*	AT4G30710.3	QWRF motif protein (DUF566)	PF04484: Family of unknown function (DUF566)	IPR007573: QWRF family		G	PF04484	IPR007573
TraesCS4A02G469600.1	1	***	tr|R7W624|R7W624_AEGTA	Aspartic proteinase nepenthesin-1	PF14543: Xylanase inhibitor N-terminal; PF14541: Xylanase inhibitor C-terminal	IPR021109: Aspartic peptidase domain; IPR032799: Xylanase inhibitor, C-terminal; IPR032861: Xylanase inhibitor, N-terminal; IPR033121: Peptidase family A1 domain		G	PF14543; PF14541	IPR021109; IPR032799; IPR032861; IPR033121
TraesCS4D02G115900.1	1	--*	sp|Q5E7L5|IF2_VIBF1	Translation initiation factor IF-2				G
TraesCS4D02G163300.1	1	***	tr|C0SW31|C0SW31_SOYBN	Receptor-like kinase	PF08263: Leucine rich repeat N-terminal domain; PF00069: Protein kinase domain	IPR000719: Protein kinase domain; IPR003591: Leucine-rich repeat, typical subtype; IPR008271: Serine/threonine-protein kinase, active site; IPR011009: Protein kinase-like domain; IPR013210: Leucine-rich repeat-containing N-terminal, plant-type; IPR017441: Protein kinase, ATP binding site; IPR032675: Leucine-rich repeat domain, L domain-like	GO:0004672 MF: protein kinase activity;GO:0005524 MF: ATP binding;GO:0006468 BP: protein phosphorylation	G	PF08263; PF00069	IPR000719; IPR003591; IPR008271; IPR011009; IPR013210; IPR017441; IPR032675	GO:0004672; GO:0005524; GO:0006468
TraesCS6A02G394900.1	1	***	tr|Q9M7J5|Q9M7J5_ELYEL	Protein kinase	PF07714: Protein tyrosine kinase	IPR000719: Protein kinase domain; IPR001245: Serine-threonine/tyrosine-protein kinase, catalytic domain; IPR011009: Protein kinase-like domain; IPR017441: Protein kinase, ATP binding site	GO:0004672 MF: protein kinase activity;GO:0005524 MF: ATP binding;GO:0006468 BP: protein phosphorylation	G	PF07714	IPR000719; IPR001245; IPR011009; IPR017441	GO:0004672; GO:0005524; GO:0006468
TraesCS4D02G315200.1	0	***	tr|A0A199V808|A0A199V808_ANACO	DUF21 domain-containing protein	PF01595: Domain of unknown function DUF21	IPR002550: Domain of unknown function DUF21		G	PF01595	IPR002550
TraesCS5B02G514600.1	1	***	tr|R7WFN7|R7WFN7_AEGTA	B3 domain-containing protein	PF02362: B3 DNA binding domain	IPR003340: B3 DNA binding domain; IPR015300: DNA-binding pseudobarrel domain	GO:0003677 MF: DNA binding	G	PF02362	IPR003340; IPR015300	GO:0003677
TraesCS6B02G259600.1	0	***	tr|M8BT32|M8BT32_AEGTA	Regulator of nonsense transcripts 2	PF02854: MIF4G domain; PF04050: Up-frameshift suppressor 2	IPR003890: MIF4G-like, type 3; IPR007193: Up-frameshift suppressor 2; IPR016024: Armadillo-type fold	GO:0003723 MF: RNA binding;GO:0005488 MF: binding;GO:0005515 MF: protein binding	G	PF02854; PF04050	IPR003890; IPR007193; IPR016024	GO:0003723; GO:0005488; GO:0005515
TraesCS6B02G345800.1	1	***	tr|A0A199W7L6|A0A199W7L6_ANACO	Transport inhibitor response 1-like protein		IPR006553: Leucine-rich repeat, cysteine-containing subtype; IPR032675: Leucine-rich repeat domain, L domain-like		G		IPR006553; IPR032675
TraesCS4A02G216200.1	1	***	tr|A0A1D5X242|A0A1D5X242_WHEAT	Protein translocase subunit SecA	PF07517: SecA DEAD-like domain; PF01043: SecA preprotein cross-linking domain; PF07516: SecA Wing and Scaffold domain	IPR000185: Protein translocase subunit SecA; IPR011115: SecA DEAD-like, N-terminal; IPR011116: SecA Wing/Scaffold; IPR011130: SecA preprotein, cross-linking domain; IPR014018: SecA motor DEAD; IPR020937: SecA conserved site; IPR027417: P-loop containing nucleoside triphosphate hydrolase	GO:0005524 MF: ATP binding;GO:0006605 BP: protein targeting;GO:0006886 BP: intracellular protein transport;GO:0016020 CC: membrane;GO:0017038 BP: protein import	G	PF07517; PF01043; PF07516	IPR000185; IPR011115; IPR011116; IPR011130; IPR014018; IPR020937; IPR027417	GO:0005524; GO:0006605; GO:0006886; GO:0016020; GO:0017038
TraesCS5D02G334300.1	1	***	tr|A0A118K5A4|A0A118K5A4_CYNCS	Thaumatin	PF00314: Thaumatin family	IPR001938: Thaumatin		G	PF00314	IPR001938
TraesCS7D02G326400.3	1	***	tr|A0A0B0N9A8|A0A0B0N9A8_GOSAR	Hepatoma-derived growth factor-related 2	PF00855: PWWP domain; PF04818: RNA polymerase II-binding domain.	IPR000313: PWWP domain; IPR006569: CID domain; IPR006903: RNA polymerase II-binding domain; IPR008942: ENTH/VHS		G	PF00855; PF04818	IPR000313; IPR006569; IPR006903; IPR008942
TraesCS3B02G377100.1	1	***	tr|A0A061EJ91|A0A061EJ91_THECC	2-oxoglutarate (2OG) and Fe(II)-dependent oxygenase superfamily protein, putative		IPR027443: Isopenicillin N synthase-like		G		IPR027443
TraesCS6A02G365600.1	1	--*	sp|Q935S7|MUKB_SALTY	Chromosome partition protein MukB				G
TraesCS3B02G438500.1	1	***	AT1G57680.3	plasminogen activator inhibitor		IPR016971: Uncharacterised conserved protein UCP031277		G		IPR016971
TraesCS4D02G315200.4	1	***	tr|A0A199V808|A0A199V808_ANACO	DUF21 domain-containing protein	PF01595: Domain of unknown function DUF21	IPR002550: Domain of unknown function DUF21		G	PF01595	IPR002550
TraesCS1A02G391000.1	1	***	tr|A0A1D5RVZ6|A0A1D5RVZ6_WHEAT	Glycosyltransferases	PF03360: Glycosyltransferase family 43	IPR005027: Glycosyl transferase, family 43; IPR029044: Nucleotide-diphospho-sugar transferases	GO:0015018 MF: galactosylgalactosylxylosylprotein 3-beta-glucuronosyltransferase activity;GO:0016020 CC: membrane	G	PF03360	IPR005027; IPR029044	GO:0015018; GO:0016020
TraesCS4A02G270900.3	0	***	tr|M8BB18|M8BB18_AEGTA	Glutamyl-tRNA(Gln) amidotransferase subunit A	PF01425: Amidase	IPR011990: Tetratricopeptide-like helical domain; IPR013026: Tetratricopeptide repeat-containing domain; IPR019734: Tetratricopeptide repeat; IPR023631: Amidase signature domain; IPR027363: Methylthioribose-1-phosphate isomerase-like, N-terminal domain	GO:0005515 MF: protein binding	G	PF01425	IPR011990; IPR013026; IPR019734; IPR023631; IPR027363	GO:0005515
TraesCS7D02G326400.1	0	***	tr|A0A061ESJ6|A0A061ESJ6_THECC	Tudor/PWWP/MBT domain-containing protein, putative isoform 2	PF04818: RNA polymerase II-binding domain.	IPR006569: CID domain; IPR006903: RNA polymerase II-binding domain; IPR008942: ENTH/VHS		G	PF04818	IPR006569; IPR006903; IPR008942
TraesCS7B02G114200.5	0	*-*	tr|A0A0B0PUI2|A0A0B0PUI2_GOSAR	Carbon catabolite repressor 4-like protein	PF03372: Endonuclease/Exonuclease/phosphatase family	IPR005135: Endonuclease/exonuclease/phosphatase		TE?	PF03372	IPR005135
TraesCS3D02G266900.1	1	***	tr|A0A1E5V0Q9|A0A1E5V0Q9_9POAL	O-acyltransferase WSD1	PF03007: Wax ester synthase-like Acyl-CoA acyltransferase domain; PF06974: Protein of unknown function (DUF1298)	IPR004255: O-acyltransferase, WSD1, N-terminal; IPR009721: O-acyltransferase WSD1, C-terminal	GO:0004144 MF: diacylglycerol O-acyltransferase activity;GO:0045017 BP: glycerolipid biosynthetic process	G	PF03007; PF06974	IPR004255; IPR009721	GO:0004144; GO:0045017
TraesCS1B02G432500.1	1	***	AT3G48660.1	transmembrane protein, putative (DUF 3339)	PF11820: Protein of unknown function (DUF3339)	IPR021775: Protein of unknown function DUF3339		G	PF11820	IPR021775
TraesCS7B02G114200.1	1	***	tr|A0A0B0P8G6|A0A0B0P8G6_GOSAR	Carbon catabolite repressor 4-like protein	PF03372: Endonuclease/Exonuclease/phosphatase family	IPR005135: Endonuclease/exonuclease/phosphatase		TE?	PF03372	IPR005135
TraesCS7B02G114200.3	0	***	tr|A0A0B0P8G6|A0A0B0P8G6_GOSAR	Carbon catabolite repressor 4-like protein	PF03372: Endonuclease/Exonuclease/phosphatase family	IPR005135: Endonuclease/exonuclease/phosphatase		TE?	PF03372	IPR005135
TraesCS7A02G251600.1	1	***	tr|A8IKC6|A8IKC6_CHLRE	Exostosin-like glycosyltransferase	PF09258: Glycosyl transferase family 64 domain	IPR015338: Exostosin , C-terminal; IPR029044: Nucleotide-diphospho-sugar transferases	GO:0006024 BP: glycosaminoglycan biosynthetic process;GO:0015012 BP: heparan sulfate proteoglycan biosynthetic process;GO:0016021 CC: integral component of membrane	G	PF09258	IPR015338; IPR029044	GO:0006024; GO:0015012; GO:0016021
TraesCS5B02G428400.1	0	***	tr|O82107|O82107_MAIZE	Calcium-dependent protein kinase	PF00069: Protein kinase domain; PF13499: EF-hand domain pair; PF13405: EF-hand domain	IPR000719: Protein kinase domain; IPR002048: EF-hand domain; IPR008271: Serine/threonine-protein kinase, active site; IPR011009: Protein kinase-like domain; IPR011992: EF-hand domain pair; IPR017441: Protein kinase, ATP binding site; IPR018247: EF-Hand 1, calcium-binding site	GO:0004672 MF: protein kinase activity;GO:0005509 MF: calcium ion binding;GO:0005524 MF: ATP binding;GO:0006468 BP: protein phosphorylation	G	PF00069; PF13499; PF13405	IPR000719; IPR002048; IPR008271; IPR011009; IPR011992; IPR017441; IPR018247	GO:0004672; GO:0005509; GO:0005524; GO:0006468
TraesCS1D02G379300.1	1	--*	tr|Q9FKV7|Q9FKV7_ARATH	Late embryogenesis abundant protein family protein				G
TraesCS6B02G120600.1	1	--*	AT3G18070.5	beta glucosidase 43				G
TraesCS3A02G230400.1	0	***	tr|A0A1E5UUT6|A0A1E5UUT6_9POAL	Dual-specificity RNA methyltransferase RlmN	PF04055: Radical SAM superfamily; PF13394: 4Fe-4S single cluster domain	IPR004383: Ribosomal RNA large subunit methyltransferase RlmN/Cfr; IPR007197: Radical SAM; IPR013785: Aldolase-type TIM barrel	GO:0003824 MF: catalytic activity;GO:0005737 CC: cytoplasm;GO:0006364 BP: rRNA processing;GO:0008173 MF: RNA methyltransferase activity;GO:0051536 MF: iron-sulfur cluster binding	G	PF04055; PF13394	IPR004383; IPR007197; IPR013785	GO:0003824; GO:0005737; GO:0006364; GO:0008173; GO:0051536
TraesCS3A02G230400.2	1	***	tr|A0A1E5UUT6|A0A1E5UUT6_9POAL	Dual-specificity RNA methyltransferase RlmN	PF04055: Radical SAM superfamily; PF13394: 4Fe-4S single cluster domain	IPR004383: Ribosomal RNA large subunit methyltransferase RlmN/Cfr; IPR007197: Radical SAM; IPR013785: Aldolase-type TIM barrel	GO:0003824 MF: catalytic activity;GO:0005737 CC: cytoplasm;GO:0006364 BP: rRNA processing;GO:0008173 MF: RNA methyltransferase activity;GO:0051536 MF: iron-sulfur cluster binding	G	PF04055; PF13394	IPR004383; IPR007197; IPR013785	GO:0003824; GO:0005737; GO:0006364; GO:0008173; GO:0051536
TraesCS5B02G428400.2	1	***	tr|O82107|O82107_MAIZE	Calcium-dependent protein kinase	PF00069: Protein kinase domain; PF13499: EF-hand domain pair	IPR000719: Protein kinase domain; IPR002048: EF-hand domain; IPR008271: Serine/threonine-protein kinase, active site; IPR011009: Protein kinase-like domain; IPR011992: EF-hand domain pair; IPR017441: Protein kinase, ATP binding site; IPR018247: EF-Hand 1, calcium-binding site	GO:0004672 MF: protein kinase activity;GO:0005509 MF: calcium ion binding;GO:0005524 MF: ATP binding;GO:0006468 BP: protein phosphorylation	G	PF00069; PF13499	IPR000719; IPR002048; IPR008271; IPR011009; IPR011992; IPR017441; IPR018247	GO:0004672; GO:0005509; GO:0005524; GO:0006468
TraesCS7D02G086000.1	1	*-*	tr|M8B7S8|M8B7S8_AEGTA	Cytochrome c oxidase subunit 5B, mitochondrial	PF01215: Cytochrome c oxidase subunit Vb	IPR002124: Cytochrome c oxidase, subunit Vb	GO:0004129 MF: cytochrome-c oxidase activity;GO:0005740 CC: mitochondrial envelope	G	PF01215	IPR002124	GO:0004129; GO:0005740
TraesCS3B02G302700.1	1	***	tr|D8L9P2|D8L9P2_WHEAT	50S ribosomal protein L15, putative, expressed	PF00828: Ribosomal proteins 50S-L15, 50S-L18e, 60S-L27A	IPR005749: Ribosomal protein L15, bacterial-type; IPR021131: Ribosomal protein L18e/L15P; IPR030878: Ribosomal protein L15	GO:0003735 MF: structural constituent of ribosome;GO:0006412 BP: translation;GO:0015934 CC: large ribosomal subunit	G	PF00828	IPR005749; IPR021131; IPR030878	GO:0003735; GO:0006412; GO:0015934
TraesCS1D02G286300.2	0	*-*	tr|A0A0D2KJF0|A0A0D2KJF0_9CHLO	Phosphatidate phosphatase, Lipin	PF04571: lipin, N-terminal conserved region; PF16876: Lipin/Ned1/Smp2 multi-domain protein middle domain; PF08235: LNS2 (Lipin/Ned1/Smp2)	IPR007651: Lipin, N-terminal; IPR013209: Lipin/Ned1/Smp2 (LNS2); IPR023214: HAD-like domain; IPR031315: LNS2/PITP; IPR031703: Lipin, middle domain		G	PF04571; PF16876; PF08235	IPR007651; IPR013209; IPR023214; IPR031315; IPR031703
TraesCS1D02G286300.1	1	*-*	tr|A0A0D2KJF0|A0A0D2KJF0_9CHLO	Phosphatidate phosphatase, Lipin	PF04571: lipin, N-terminal conserved region; PF16876: Lipin/Ned1/Smp2 multi-domain protein middle domain; PF08235: LNS2 (Lipin/Ned1/Smp2)	IPR007651: Lipin, N-terminal; IPR013209: Lipin/Ned1/Smp2 (LNS2); IPR023214: HAD-like domain; IPR031315: LNS2/PITP; IPR031703: Lipin, middle domain		G	PF04571; PF16876; PF08235	IPR007651; IPR013209; IPR023214; IPR031315; IPR031703
TraesCS7A02G331400.1	1	***	tr|A0A072VSF9|A0A072VSF9_MEDTR	Neurogenic locus notch-like protein				G
TraesCS6A02G102700.2	0	***	tr|A0A1E5W5X5|A0A1E5W5X5_9POAL	Prolyl endopeptidase	PF02897: Prolyl oligopeptidase, N-terminal beta-propeller domain; PF00326: Prolyl oligopeptidase family	IPR001375: Peptidase S9, prolyl oligopeptidase, catalytic domain; IPR002470: Peptidase S9A, prolyl oligopeptidase; IPR023302: Peptidase S9A, N-terminal domain; IPR029058: Alpha/Beta hydrolase fold	GO:0004252 MF: serine-type endopeptidase activity;GO:0006508 BP: proteolysis;GO:0008236 MF: serine-type peptidase activity;GO:0070008 MF: serine-type exopeptidase activity	G	PF02897; PF00326	IPR001375; IPR002470; IPR023302; IPR029058	GO:0004252; GO:0006508; GO:0008236; GO:0070008
TraesCS6A02G102700.1	1	***	tr|B6U134|B6U134_MAIZE	Prolyl endopeptidase	PF02897: Prolyl oligopeptidase, N-terminal beta-propeller domain; PF00326: Prolyl oligopeptidase family	IPR001375: Peptidase S9, prolyl oligopeptidase, catalytic domain; IPR002470: Peptidase S9A, prolyl oligopeptidase; IPR023302: Peptidase S9A, N-terminal domain; IPR029058: Alpha/Beta hydrolase fold	GO:0004252 MF: serine-type endopeptidase activity;GO:0006508 BP: proteolysis;GO:0008236 MF: serine-type peptidase activity;GO:0070008 MF: serine-type exopeptidase activity	G	PF02897; PF00326	IPR001375; IPR002470; IPR023302; IPR029058	GO:0004252; GO:0006508; GO:0008236; GO:0070008
TraesCS1D02G304800.1	1	***	tr|A0A1D5SZN2|A0A1D5SZN2_WHEAT	Protein DETOXIFICATION	PF01554: MatE	IPR002528: Multi antimicrobial extrusion protein	GO:0006855 BP: drug transmembrane transport;GO:0015238 MF: drug transmembrane transporter activity;GO:0015297 MF: antiporter activity;GO:0016020 CC: membrane;GO:0055085 BP: transmembrane transport	G	PF01554	IPR002528	GO:0006855; GO:0015238; GO:0015297; GO:0016020; GO:0055085
TraesCS1D02G304800.2	0	***	tr|A0A1D5SZM9|A0A1D5SZM9_WHEAT	Protein DETOXIFICATION	PF01554: MatE	IPR002528: Multi antimicrobial extrusion protein	GO:0006855 BP: drug transmembrane transport;GO:0015238 MF: drug transmembrane transporter activity;GO:0015297 MF: antiporter activity;GO:0016020 CC: membrane;GO:0055085 BP: transmembrane transport	G	PF01554	IPR002528	GO:0006855; GO:0015238; GO:0015297; GO:0016020; GO:0055085
TraesCS1B02G057100.1	1	***	tr|T2DNC6|T2DNC6_PHAVU	Protein transport SEC13-like protein	PF00400: WD domain, G-beta repeat	IPR001680: WD40 repeat; IPR015943: WD40/YVTN repeat-like-containing domain; IPR017986: WD40-repeat-containing domain	GO:0005515 MF: protein binding	G	PF00400	IPR001680; IPR015943; IPR017986	GO:0005515
TraesCS7B02G302100.2	0	***	tr|A0A199UND4|A0A199UND4_ANACO	RAB6A-GEF complex partner protein 2		IPR013783: Immunoglobulin-like fold		G		IPR013783
TraesCS5B02G132000.1	1	***	tr|W5FVW5|W5FVW5_WHEAT	Ubiquitin-like protein 5	PF00240: Ubiquitin family	IPR000626: Ubiquitin domain; IPR029071: Ubiquitin-related domain	GO:0005515 MF: protein binding	G	PF00240	IPR000626; IPR029071	GO:0005515
TraesCS4B02G356800.1	1	***	tr|L0N608|L0N608_WHEAT	Cell wall invertase	PF00251: Glycosyl hydrolases family 32 N-terminal domain; PF08244: Glycosyl hydrolases family 32 C terminal	IPR001362: Glycoside hydrolase, family 32; IPR013148: Glycosyl hydrolase family 32, N-terminal; IPR013189: Glycosyl hydrolase family 32, C-terminal; IPR013320: Concanavalin A-like lectin/glucanase domain; IPR018053: Glycoside hydrolase, family 32, active site; IPR023296: Glycosyl hydrolase, five-bladed beta-propellor domain	GO:0004553 MF: hydrolase activity, hydrolyzing O-glycosyl compounds;GO:0005975 BP: carbohydrate metabolic process	G	PF00251; PF08244	IPR001362; IPR013148; IPR013189; IPR013320; IPR018053; IPR023296	GO:0004553; GO:0005975
TraesCS3B02G099600.1	1	***	tr|A0A061DTU0|A0A061DTU0_THECC	Cytochrome P450 family protein	PF00067: Cytochrome P450	IPR001128: Cytochrome P450; IPR002401: Cytochrome P450, E-class, group I	GO:0005506 MF: iron ion binding;GO:0016705 MF: oxidoreductase activity, acting on paired donors, with incorporation or reduction of molecular oxygen;GO:0020037 MF: heme binding;GO:0055114 BP: oxidation-reduction process	G	PF00067	IPR001128; IPR002401	GO:0005506; GO:0016705; GO:0020037; GO:0055114
TraesCS1A02G172800.1	1	--*	sp|P58854|GCP3_MOUSE	Gamma-tubulin complex component 3				G
TraesCS6B02G043300.1	1	***	tr|Q67UH1|Q67UH1_ORYSJ	Mitochondrial transcription termination factor-like	PF02536: mTERF	IPR003690: Transcription termination factor, mitochondrial/chloroplastic	GO:0003690 MF: double-stranded DNA binding;GO:0006355 BP: regulation of transcription, DNA-templated	G	PF02536	IPR003690	GO:0003690; GO:0006355
TraesCS5D02G365600.2	1	***	tr|M8APL5|M8APL5_AEGTA	Carboxyl-terminal-processing protease	PF13180: PDZ domain; PF03572: Peptidase family S41	IPR001478: PDZ domain; IPR004447: C-terminal-processing peptidase S41A; IPR005151: Tail specific protease; IPR029045: ClpP/crotonase-like domain	GO:0005515 MF: protein binding;GO:0006508 BP: proteolysis;GO:0008236 MF: serine-type peptidase activity	G	PF13180; PF03572	IPR001478; IPR004447; IPR005151; IPR029045	GO:0005515; GO:0006508; GO:0008236
TraesCS5D02G365600.1	0	***	tr|M8APL5|M8APL5_AEGTA	Carboxyl-terminal-processing protease	PF13180: PDZ domain; PF03572: Peptidase family S41	IPR001478: PDZ domain; IPR004447: C-terminal-processing peptidase S41A; IPR005151: Tail specific protease; IPR029045: ClpP/crotonase-like domain	GO:0005515 MF: protein binding;GO:0006508 BP: proteolysis;GO:0008236 MF: serine-type peptidase activity	G	PF13180; PF03572	IPR001478; IPR004447; IPR005151; IPR029045	GO:0005515; GO:0006508; GO:0008236
TraesCS4A02G001600.1	1	***	tr|M8AL36|M8AL36_AEGTA	Sn1-specific diacylglycerol lipase alpha	PF01764: Lipase (class 3)	IPR002921: Fungal lipase-like domain; IPR029058: Alpha/Beta hydrolase fold	GO:0006629 BP: lipid metabolic process	G	PF01764	IPR002921; IPR029058	GO:0006629
TraesCS6A02G370100.1	1	***	tr|B9T7R7|B9T7R7_RICCO	Alcohol dehydrogenase, putative	PF08240: Alcohol dehydrogenase GroES-like domain; PF00107: Zinc-binding dehydrogenase	IPR002328: Alcohol dehydrogenase, zinc-type, conserved site; IPR011032: GroES-like; IPR013149: Alcohol dehydrogenase, C-terminal; IPR013154: Alcohol dehydrogenase, N-terminal; IPR016040: NAD(P)-binding domain; IPR020843: Polyketide synthase, enoylreductase domain	GO:0008270 MF: zinc ion binding;GO:0016491 MF: oxidoreductase activity;GO:0055114 BP: oxidation-reduction process	G	PF08240; PF00107	IPR002328; IPR011032; IPR013149; IPR013154; IPR016040; IPR020843	GO:0008270; GO:0016491; GO:0055114
TraesCS3D02G099600.3	0	***	tr|M8CKI5|M8CKI5_AEGTA	Breast cancer type 2 susceptibility protein-like protein	PF00634: BRCA2 repeat; PF09169: BRCA2, helical; PF09103: BRCA2, oligonucleotide/oligosaccharide-binding, domain 1	IPR002093: BRCA2 repeat; IPR012340: Nucleic acid-binding, OB-fold; IPR015187: BRCA2, oligonucleotide/oligosaccharide-binding 1; IPR015205: Tower domain; IPR015252: Breast cancer type 2 susceptibility protein, helical domain	GO:0000724 BP: double-strand break repair via homologous recombination	G	PF00634; PF09169; PF09103	IPR002093; IPR012340; IPR015187; IPR015205; IPR015252	GO:0000724
TraesCS3D02G099600.2	0	***	tr|M8CKI5|M8CKI5_AEGTA	Breast cancer type 2 susceptibility protein-like protein	PF00634: BRCA2 repeat; PF09169: BRCA2, helical; PF09103: BRCA2, oligonucleotide/oligosaccharide-binding, domain 1	IPR002093: BRCA2 repeat; IPR012340: Nucleic acid-binding, OB-fold; IPR015187: BRCA2, oligonucleotide/oligosaccharide-binding 1; IPR015205: Tower domain; IPR015252: Breast cancer type 2 susceptibility protein, helical domain	GO:0000724 BP: double-strand break repair via homologous recombination	G	PF00634; PF09169; PF09103	IPR002093; IPR012340; IPR015187; IPR015205; IPR015252	GO:0000724
TraesCS3D02G099600.1	1	***	tr|M8CKI5|M8CKI5_AEGTA	Breast cancer type 2 susceptibility protein-like protein	PF00634: BRCA2 repeat; PF09169: BRCA2, helical; PF09103: BRCA2, oligonucleotide/oligosaccharide-binding, domain 1	IPR002093: BRCA2 repeat; IPR012340: Nucleic acid-binding, OB-fold; IPR015187: BRCA2, oligonucleotide/oligosaccharide-binding 1; IPR015205: Tower domain; IPR015252: Breast cancer type 2 susceptibility protein, helical domain	GO:0000724 BP: double-strand break repair via homologous recombination	G	PF00634; PF09169; PF09103	IPR002093; IPR012340; IPR015187; IPR015205; IPR015252	GO:0000724
TraesCS3D02G099600.7	0	***	tr|M8CKI5|M8CKI5_AEGTA	Breast cancer type 2 susceptibility protein-like protein	PF00634: BRCA2 repeat; PF09169: BRCA2, helical; PF09103: BRCA2, oligonucleotide/oligosaccharide-binding, domain 1	IPR002093: BRCA2 repeat; IPR012340: Nucleic acid-binding, OB-fold; IPR015187: BRCA2, oligonucleotide/oligosaccharide-binding 1; IPR015205: Tower domain; IPR015252: Breast cancer type 2 susceptibility protein, helical domain	GO:0000724 BP: double-strand break repair via homologous recombination	G	PF00634; PF09169; PF09103	IPR002093; IPR012340; IPR015187; IPR015205; IPR015252	GO:0000724
TraesCS3D02G099600.6	0	***	tr|M8CKI5|M8CKI5_AEGTA	Breast cancer type 2 susceptibility protein-like protein	PF00634: BRCA2 repeat; PF09169: BRCA2, helical	IPR002093: BRCA2 repeat; IPR015252: Breast cancer type 2 susceptibility protein, helical domain		G	PF00634; PF09169	IPR002093; IPR015252
TraesCS3D02G099600.5	0	***	tr|M8CKI5|M8CKI5_AEGTA	Breast cancer type 2 susceptibility protein-like protein	PF00634: BRCA2 repeat; PF09169: BRCA2, helical; PF09103: BRCA2, oligonucleotide/oligosaccharide-binding, domain 1	IPR002093: BRCA2 repeat; IPR012340: Nucleic acid-binding, OB-fold; IPR015187: BRCA2, oligonucleotide/oligosaccharide-binding 1; IPR015205: Tower domain; IPR015252: Breast cancer type 2 susceptibility protein, helical domain	GO:0000724 BP: double-strand break repair via homologous recombination	G	PF00634; PF09169; PF09103	IPR002093; IPR012340; IPR015187; IPR015205; IPR015252	GO:0000724
TraesCS3D02G099600.4	0	***	tr|M8CKI5|M8CKI5_AEGTA	Breast cancer type 2 susceptibility protein-like protein	PF00634: BRCA2 repeat; PF09169: BRCA2, helical; PF09103: BRCA2, oligonucleotide/oligosaccharide-binding, domain 1	IPR002093: BRCA2 repeat; IPR012340: Nucleic acid-binding, OB-fold; IPR015187: BRCA2, oligonucleotide/oligosaccharide-binding 1; IPR015205: Tower domain; IPR015252: Breast cancer type 2 susceptibility protein, helical domain	GO:0000724 BP: double-strand break repair via homologous recombination	G	PF00634; PF09169; PF09103	IPR002093; IPR012340; IPR015187; IPR015205; IPR015252	GO:0000724
TraesCS2D02G245500.2	1	*-*	tr|G7K2M1|G7K2M1_MEDTR	AT-rich interactive domain protein	PF01388: ARID/BRIGHT DNA binding domain; PF00011: Hsp20/alpha crystallin family	IPR001606: ARID DNA-binding domain; IPR002068: Alpha crystallin/Hsp20 domain; IPR008978: HSP20-like chaperone	GO:0003677 MF: DNA binding	G	PF01388; PF00011	IPR001606; IPR002068; IPR008978	GO:0003677
TraesCS3D02G019900.1	0	***	tr|A0A061EGA0|A0A061EGA0_THECC	RING/FYVE/PHD zinc finger superfamily protein	PF12906: RING-variant domain; PF12428: Protein of unknown function (DUF3675)	IPR011016: Zinc finger, RING-CH-type; IPR013083: Zinc finger, RING/FYVE/PHD-type; IPR022143: Protein of unknown function DUF3675	GO:0008270 MF: zinc ion binding	TE?	PF12906; PF12428	IPR011016; IPR013083; IPR022143	GO:0008270
TraesCS3D02G019900.2	1	***	tr|A0A061EGA0|A0A061EGA0_THECC	RING/FYVE/PHD zinc finger superfamily protein	PF12906: RING-variant domain; PF12428: Protein of unknown function (DUF3675)	IPR011016: Zinc finger, RING-CH-type; IPR013083: Zinc finger, RING/FYVE/PHD-type; IPR022143: Protein of unknown function DUF3675	GO:0008270 MF: zinc ion binding	TE?	PF12906; PF12428	IPR011016; IPR013083; IPR022143	GO:0008270
TraesCS2D02G245500.1	0	*-*	tr|G7K2M1|G7K2M1_MEDTR	AT-rich interactive domain protein	PF01388: ARID/BRIGHT DNA binding domain	IPR001606: ARID DNA-binding domain; IPR008978: HSP20-like chaperone	GO:0003677 MF: DNA binding	G	PF01388	IPR001606; IPR008978	GO:0003677
TraesCS6A02G051300.1	1	***	tr|A0A1D6AH17|A0A1D6AH17_WHEAT	Glycosyltransferase	PF00201: UDP-glucoronosyl and UDP-glucosyl transferase	IPR002213: UDP-glucuronosyl/UDP-glucosyltransferase	GO:0008152 BP: metabolic process;GO:0016758 MF: transferase activity, transferring hexosyl groups	G	PF00201	IPR002213	GO:0008152; GO:0016758
TraesCS3D02G194700.1	1	***	tr|A0A0B5WYA8|A0A0B5WYA8_MANES	Phosphate transporter	PF07690: Major Facilitator Superfamily	IPR011701: Major facilitator superfamily; IPR020846: Major facilitator superfamily domain	GO:0016021 CC: integral component of membrane;GO:0055085 BP: transmembrane transport	G	PF07690	IPR011701; IPR020846	GO:0016021; GO:0055085
TraesCS3D02G364600.1	1	***	tr|A0A1E5W316|A0A1E5W316_9POAL	Sialyltransferase-like protein 2	PF00777: Glycosyltransferase family 29 (sialyltransferase)	IPR001675: Glycosyl transferase family 29	GO:0006486 BP: protein glycosylation;GO:0008373 MF: sialyltransferase activity	G	PF00777	IPR001675	GO:0006486; GO:0008373
TraesCS3A02G469700.1	1	-**	AT5G50220.1	F-box family protein	PF08268: F-box associated domain	IPR001810: F-box domain; IPR013187: F-box associated domain, type 3	GO:0005515 MF: protein binding	TE?	PF08268	IPR001810; IPR013187	GO:0005515
TraesCS2B02G599600.1	1	***	tr|A0A118JZQ3|A0A118JZQ3_CYNCS	SART-1 protein	PF03343: SART-1 family	IPR005011: SNU66/SART1 family	GO:0000398 BP: mRNA splicing, via spliceosome	G	PF03343	IPR005011	GO:0000398
TraesCS7B02G087600.1	1	*-*	tr|Q67UH1|Q67UH1_ORYSJ	Mitochondrial transcription termination factor-like	PF02536: mTERF	IPR003690: Transcription termination factor, mitochondrial/chloroplastic	GO:0003690 MF: double-stranded DNA binding;GO:0006355 BP: regulation of transcription, DNA-templated	G	PF02536	IPR003690	GO:0003690; GO:0006355
TraesCS5B02G499100.1	1	***	tr|A0A0K9NWM9|A0A0K9NWM9_ZOSMR	Nucleobase ascorbate transporter	PF00860: Permease family	IPR006043: Xanthine/uracil/vitamin C permease	GO:0005215 MF: transporter activity;GO:0006810 BP: transport;GO:0016020 CC: membrane;GO:0055085 BP: transmembrane transport	G	PF00860	IPR006043	GO:0005215; GO:0006810; GO:0016020; GO:0055085
TraesCS5D02G506200.2	0	***	tr|B9IK08|B9IK08_POPTR	SPX domain-containing family protein	PF03105: SPX domain	IPR004331: SPX domain		G	PF03105	IPR004331
TraesCS5D02G506200.1	1	***	tr|B9IK08|B9IK08_POPTR	SPX domain-containing family protein	PF03105: SPX domain	IPR004331: SPX domain		G	PF03105	IPR004331
TraesCS6A02G155900.1	1	***	tr|M8AW73|M8AW73_TRIUA	Haloacid dehalogenase-like hydrolase domain-containing protein 3	PF00702: haloacid dehalogenase-like hydrolase	IPR006439: HAD hydrolase, subfamily IA; IPR011949: HAD-superfamily hydrolase, subfamily IA, REG-2-like; IPR023214: HAD-like domain	GO:0008152 BP: metabolic process;GO:0016787 MF: hydrolase activity	G	PF00702	IPR006439; IPR011949; IPR023214	GO:0008152; GO:0016787
TraesCS1B02G186200.4	0	***	tr|A0A1D1YY17|A0A1D1YY17_9ARAE	Wings apart-like	PF07814: Wings apart-like protein regulation of heterochromatin	IPR011989: Armadillo-like helical; IPR022771: Wings apart-like protein		G	PF07814	IPR011989; IPR022771
TraesCS1B02G186200.5	0	***	tr|A0A1D1YY17|A0A1D1YY17_9ARAE	Wings apart-like	PF07814: Wings apart-like protein regulation of heterochromatin	IPR011989: Armadillo-like helical; IPR022771: Wings apart-like protein		G	PF07814	IPR011989; IPR022771
TraesCS1B02G186200.6	0	***	tr|A0A1D1YY17|A0A1D1YY17_9ARAE	Wings apart-like	PF07814: Wings apart-like protein regulation of heterochromatin	IPR011989: Armadillo-like helical; IPR022771: Wings apart-like protein		G	PF07814	IPR011989; IPR022771
TraesCS1B02G186200.7	0	***	tr|A0A1D1YY17|A0A1D1YY17_9ARAE	Wings apart-like	PF07814: Wings apart-like protein regulation of heterochromatin	IPR011989: Armadillo-like helical; IPR022771: Wings apart-like protein		G	PF07814	IPR011989; IPR022771
TraesCS5A02G318200.4	0	*-*	tr|G7KGD4|G7KGD4_MEDTR	Zinc finger CCCH domain protein	PF02201: SWIB/MDM2 domain; PF03126: Plus-3 domain; PF02213: GYF domain	IPR000571: Zinc finger, CCCH-type; IPR003121: SWIB/MDM2 domain; IPR003169: GYF domain; IPR004343: Plus-3 domain	GO:0003677 MF: DNA binding;GO:0005515 MF: protein binding;GO:0046872 MF: metal ion binding	TE?	PF02201; PF03126; PF02213	IPR000571; IPR003121; IPR003169; IPR004343	GO:0003677; GO:0005515; GO:0046872
TraesCS1B02G186200.1	0	***	tr|A0A1D1YY17|A0A1D1YY17_9ARAE	Wings apart-like	PF07814: Wings apart-like protein regulation of heterochromatin	IPR011989: Armadillo-like helical; IPR022771: Wings apart-like protein		G	PF07814	IPR011989; IPR022771
TraesCS1B02G186200.2	0	***	tr|A0A1D1YY17|A0A1D1YY17_9ARAE	Wings apart-like	PF07814: Wings apart-like protein regulation of heterochromatin	IPR011989: Armadillo-like helical; IPR016024: Armadillo-type fold; IPR022771: Wings apart-like protein	GO:0005488 MF: binding	G	PF07814	IPR011989; IPR016024; IPR022771	GO:0005488
TraesCS1B02G186200.3	0	***	tr|A0A1D1YY17|A0A1D1YY17_9ARAE	Wings apart-like	PF07814: Wings apart-like protein regulation of heterochromatin	IPR011989: Armadillo-like helical; IPR016024: Armadillo-type fold; IPR022771: Wings apart-like protein	GO:0005488 MF: binding	G	PF07814	IPR011989; IPR016024; IPR022771	GO:0005488
TraesCS2B02G290700.1	1	*-*	tr|A0A199UHT6|A0A199UHT6_ANACO	Preprotein translocase subunit SECE1				G
TraesCS1B02G186200.8	0	***	tr|A0A1D1YY17|A0A1D1YY17_9ARAE	Wings apart-like	PF07814: Wings apart-like protein regulation of heterochromatin	IPR011989: Armadillo-like helical; IPR022771: Wings apart-like protein		G	PF07814	IPR011989; IPR022771
TraesCS1B02G186200.9	1	***	tr|A0A1D1YY17|A0A1D1YY17_9ARAE	Wings apart-like	PF07814: Wings apart-like protein regulation of heterochromatin	IPR011989: Armadillo-like helical; IPR022771: Wings apart-like protein		G	PF07814	IPR011989; IPR022771
TraesCS3B02G583000.3	0	***	AT4G13985.1	FBD-associated F-box protein	PF00646: F-box domain	IPR001810: F-box domain; IPR032675: Leucine-rich repeat domain, L domain-like	GO:0005515 MF: protein binding	TE?	PF00646	IPR001810; IPR032675	GO:0005515
TraesCS1D02G218200.1	1	***	tr|B9N888|B9N888_POPTR	Kinase family protein	PF00069: Protein kinase domain	IPR000719: Protein kinase domain; IPR008271: Serine/threonine-protein kinase, active site; IPR011009: Protein kinase-like domain; IPR017441: Protein kinase, ATP binding site	GO:0004672 MF: protein kinase activity;GO:0005524 MF: ATP binding;GO:0006468 BP: protein phosphorylation	G	PF00069	IPR000719; IPR008271; IPR011009; IPR017441	GO:0004672; GO:0005524; GO:0006468
TraesCS3B02G583000.1	0	***	AT4G13985.1	FBD-associated F-box protein	PF00646: F-box domain	IPR001810: F-box domain; IPR032675: Leucine-rich repeat domain, L domain-like	GO:0005515 MF: protein binding	TE?	PF00646	IPR001810; IPR032675	GO:0005515
TraesCS5B02G143400.1	1	***	tr|A0A199W9A8|A0A199W9A8_ANACO	Ethanolamine-phosphate cytidylyltransferase	PF01467: Cytidylyltransferase-like	IPR004821: Cytidyltransferase-like domain; IPR014729: Rossmann-like alpha/beta/alpha sandwich fold	GO:0003824 MF: catalytic activity;GO:0009058 BP: biosynthetic process	G	PF01467	IPR004821; IPR014729	GO:0003824; GO:0009058
TraesCS7A02G069700.1	1	***	tr|B9RYW1|B9RYW1_RICCO	Glucan endo-1,3-beta-glucosidase, putative	PF00332: Glycosyl hydrolases family 17	IPR000490: Glycoside hydrolase family 17; IPR017853: Glycoside hydrolase superfamily	GO:0004553 MF: hydrolase activity, hydrolyzing O-glycosyl compounds;GO:0005975 BP: carbohydrate metabolic process	G	PF00332	IPR000490; IPR017853	GO:0004553; GO:0005975
TraesCS4B02G165100.1	1	***	tr|A0A1D5XK08|A0A1D5XK08_WHEAT	ATP-dependent Clp protease proteolytic subunit	PF00574: Clp protease	IPR001907: ATP-dependent Clp protease proteolytic subunit; IPR023562: Clp protease proteolytic subunit /Translocation-enhancing protein TepA; IPR029045: ClpP/crotonase-like domain; IPR033135: ClpP, histidine active site	GO:0004252 MF: serine-type endopeptidase activity;GO:0006508 BP: proteolysis	G	PF00574	IPR001907; IPR023562; IPR029045; IPR033135	GO:0004252; GO:0006508
TraesCS5D02G192400.2	1	***	tr|A0A1E5WNA2|A0A1E5WNA2_9POAL	Protein SAWADEE HOMEODOMAIN-like protein 2	PF16719: SAWADEE domain	IPR032001: SAWADEE domain	GO:0003682 MF: chromatin binding	G	PF16719	IPR032001	GO:0003682
TraesCS4A02G297400.1	1	*-*	tr|A0A061EMS6|A0A061EMS6_THECC	PH-response transcription factor pacC/RIM101 isoform 2				G
TraesCS7A02G297900.1	0	***	tr|A0A072TGI9|A0A072TGI9_MEDTR	RNA polymerase sigma factor	PF04542: Sigma-70 region 2; PF04539: Sigma-70 region 3	IPR000943: RNA polymerase sigma-70; IPR007624: RNA polymerase sigma-70 region 3; IPR007627: RNA polymerase sigma-70 region 2; IPR011991: Winged helix-turn-helix DNA-binding domain; IPR013324: RNA polymerase sigma factor, region 3/4; IPR013325: RNA polymerase sigma factor, region 2; IPR014284: RNA polymerase sigma-70 like domain	GO:0003677 MF: DNA binding;GO:0003700 MF: transcription factor activity, sequence-specific DNA binding;GO:0006352 BP: DNA-templated transcription, initiation;GO:0006355 BP: regulation of transcription, DNA-templated;GO:0016987 MF: sigma factor activity	G	PF04542; PF04539	IPR000943; IPR007624; IPR007627; IPR011991; IPR013324; IPR013325; IPR014284	GO:0003677; GO:0003700; GO:0006352; GO:0006355; GO:0016987
TraesCS1B02G275300.1	1	***	tr|Q76M94|Q76M94_ASPOF	Cytochrome P450	PF00067: Cytochrome P450	IPR001128: Cytochrome P450; IPR002401: Cytochrome P450, E-class, group I; IPR017972: Cytochrome P450, conserved site	GO:0005506 MF: iron ion binding;GO:0016705 MF: oxidoreductase activity, acting on paired donors, with incorporation or reduction of molecular oxygen;GO:0020037 MF: heme binding;GO:0055114 BP: oxidation-reduction process	G	PF00067	IPR001128; IPR002401; IPR017972	GO:0005506; GO:0016705; GO:0020037; GO:0055114
TraesCS6A02G193700.1	1	***	tr|I1IAN6|I1IAN6_BRADI	Vesicle transport protein	PF04178: Got1/Sft2-like family	IPR007305: Vesicle transport protein, Got1/SFT2-like	GO:0016192 BP: vesicle-mediated transport	G	PF04178	IPR007305	GO:0016192
TraesCS1D02G140400.2	0	***	tr|A0A0K9PAR3|A0A0K9PAR3_ZOSMR	ABC transporter G family member	PF00005: ABC transporter	IPR003439: ABC transporter-like; IPR017871: ABC transporter, conserved site; IPR027417: P-loop containing nucleoside triphosphate hydrolase	GO:0005524 MF: ATP binding;GO:0016887 MF: ATPase activity	G	PF00005	IPR003439; IPR017871; IPR027417	GO:0005524; GO:0016887
TraesCS1D02G140400.1	1	***	tr|A0A0K9PAR3|A0A0K9PAR3_ZOSMR	ABC transporter G family member	PF00005: ABC transporter	IPR003439: ABC transporter-like; IPR003593: AAA+ ATPase domain; IPR017871: ABC transporter, conserved site; IPR027417: P-loop containing nucleoside triphosphate hydrolase	GO:0005524 MF: ATP binding;GO:0016887 MF: ATPase activity	G	PF00005	IPR003439; IPR003593; IPR017871; IPR027417	GO:0005524; GO:0016887
TraesCS3B02G173000.1	1	***	tr|A0A072VFJ3|A0A072VFJ3_MEDTR	IGR motif protein	PF09597: IGR protein motif	IPR019083: IGR protein motif		G	PF09597	IPR019083
TraesCS3B02G558800.1	1	***	tr|R7VYV4|R7VYV4_AEGTA	Strictosidine synthase	PF03088: Strictosidine synthase	IPR011042: Six-bladed beta-propeller, TolB-like; IPR018119: Strictosidine synthase, conserved region	GO:0009058 BP: biosynthetic process;GO:0016844 MF: strictosidine synthase activity	G	PF03088	IPR011042; IPR018119	GO:0009058; GO:0016844
TraesCS6B02G244700.1	1	***	tr|A0A061FS34|A0A061FS34_THECC	Leucine-rich repeat receptor-like protein kinase family protein, putative	PF08263: Leucine rich repeat N-terminal domain; PF13855: Leucine rich repeat; PF00560: Leucine Rich Repeat	IPR001611: Leucine-rich repeat; IPR003591: Leucine-rich repeat, typical subtype; IPR013210: Leucine-rich repeat-containing N-terminal, plant-type; IPR032675: Leucine-rich repeat domain, L domain-like	GO:0005515 MF: protein binding	G	PF08263; PF13855; PF00560	IPR001611; IPR003591; IPR013210; IPR032675	GO:0005515
TraesCS6A02G153700.1	1	***	tr|B6SRW9|B6SRW9_MAIZE	B-box zinc finger family protein		IPR000315: B-box-type zinc finger	GO:0005622 CC: intracellular;GO:0008270 MF: zinc ion binding	TE?		IPR000315	GO:0005622; GO:0008270
TraesCS3B02G185400.1	1	***	tr|A0A0K9PZ13|A0A0K9PZ13_ZOSMR	Basic helix-loop-helix (BHLH) family transcription factor	PF14215: bHLH-MYC and R2R3-MYB transcription factors N-terminal; PF00010: Helix-loop-helix DNA-binding domain	IPR011598: Myc-type, basic helix-loop-helix (bHLH) domain; IPR025610: Transcription factor MYC/MYB N-terminal; IPR029016: GAF domain-like	GO:0046983 MF: protein dimerization activity	G	PF14215; PF00010	IPR011598; IPR025610; IPR029016	GO:0046983
TraesCS7B02G059300.1	1	***	tr|D7LHK4|D7LHK4_ARALL	Kinase	PF00582: Universal stress protein family; PF07714: Protein tyrosine kinase	IPR000719: Protein kinase domain; IPR001245: Serine-threonine/tyrosine-protein kinase, catalytic domain; IPR006016: UspA; IPR008271: Serine/threonine-protein kinase, active site; IPR011009: Protein kinase-like domain; IPR014729: Rossmann-like alpha/beta/alpha sandwich fold	GO:0004672 MF: protein kinase activity;GO:0005524 MF: ATP binding;GO:0006468 BP: protein phosphorylation;GO:0006950 BP: response to stress	G	PF00582; PF07714	IPR000719; IPR001245; IPR006016; IPR008271; IPR011009; IPR014729	GO:0004672; GO:0005524; GO:0006468; GO:0006950
TraesCS3B02G267200.1	1	--*	sp|B9KJU9|CLPP_RHOSK	ATP-dependent Clp protease proteolytic subunit	PF07893: Protein of unknown function (DUF1668)	IPR012871: Protein of unknown function DUF1677, Oryza sativa		G	PF07893	IPR012871
TraesCS5A02G112400.1	1	***	tr|Q7X744|Q7X744_WHEAT	Ribosomal protein L3	PF00297: Ribosomal protein L3	IPR000597: Ribosomal protein L3; IPR009000: Translation protein, beta-barrel domain; IPR019926: Ribosomal protein L3, conserved site	GO:0003735 MF: structural constituent of ribosome;GO:0005622 CC: intracellular;GO:0005840 CC: ribosome;GO:0006412 BP: translation	G	PF00297	IPR000597; IPR009000; IPR019926	GO:0003735; GO:0005622; GO:0005840; GO:0006412
TraesCS2D02G558500.1	1	***	tr|Q6K268|Q6K268_ORYSJ	Ankyrin repeat protein-like	PF12796: Ankyrin repeats (3 copies)	IPR002110: Ankyrin repeat; IPR011990: Tetratricopeptide-like helical domain; IPR019734: Tetratricopeptide repeat; IPR020683: Ankyrin repeat-containing domain	GO:0005515 MF: protein binding	G	PF12796	IPR002110; IPR011990; IPR019734; IPR020683	GO:0005515
[truncated: 45,776 more rows]

## Sheet: BP_enrichment
File created with bingo (c) on Nov 18, 2019 at 10:50:09 AM
ontology: namespace
curator: bingo
Selected ontology file : bundle://112.0:1/data/GO_Biological_Process
Selected annotation file : /Users/busra.cagirici/workplace/G4/results/wheat/annotation/wheat_all_noUn.GAF
Discarded evidence codes :
Overrepresentation
Selected statistical test : Hypergeometric test
Selected correction : Benjamini & Hochberg False Discovery Rate (FDR) correction
[truncated: 213 more rows]

## Sheet: MF_enrichment
File created with bingo (c) on Nov 18, 2019 at 10:50:40 AM
[truncated: 114 more rows]

[truncated: 1 more sheets: CC_enrichment]
